# Supplementary material for: Catalyst-free formal [3 + 2] cycloaddition of stabilized N,N-cyclic azomethine imines to 3-nitrobenzofurans and 3-nitro-4H-chromenes: access to heteroannulated pyrazolo[1,2-a]pyrazoles
Source: Royal Society of Chemistry journal article supplement (doi:10.1039/d1ob01377g), 2021-01-01

Supporting Information for

**Catalyst-free formal [3 + 2] cycloaddition of stabilized N,N-cyclic azomethine imines to 3-nitrobenzofurans and 3-nitro-4H-chromenes.  
Access to heteroannulated pyrazolo[1,2-a]pyrazoles**

Dmitry V. Osipov,<sup>\*a</sup> Kirill S. Korzhenko,<sup>a</sup> Daria A. Rashchepkina,<sup>a</sup>  
Alina A. Artyomenko,<sup>a</sup> Oleg P. Demidov,<sup>b</sup> Vadim A. Shiryayev<sup>a</sup>  
and Vitaly A. Osyanin<sup>a</sup>

\*osipovdv25@mail.ru

<sup>a</sup>Department of Organic Chemistry, Chemical Technological Faculty, Samara State Technical University,  
244 Molodogvardeyskaya St., Samara 443100, Russia.

<sup>b</sup>Department of Chemistry, North Caucasus Federal University, 1 Pushkin St., Stavropol 355009, Russia.

Table of Contents

|      |                                                                                                                         |     |
|------|-------------------------------------------------------------------------------------------------------------------------|-----|
| I.   | Structures disclosure                                                                                                   | S2  |
| II.  | Cartesian coordinates of the geometries optimized in DMSO<br>for cycloaddition of azomethine imine <b>2a</b> with model |     |
|      | 3-nitrobenzofuran                                                                                                       | S3  |
|      | 3-nitro-4H-chromene                                                                                                     | S20 |
|      | 2-nitrobenzofuran                                                                                                       | S34 |
|      | 3-nitrobenzothiophene                                                                                                   | S39 |
|      | 1-mesyl-3-nitroindole                                                                                                   | S43 |
| III. | Single crystal X-ray structure analysis                                                                                 |     |
|      | crystal data and structure refinement for <b>3aa</b>                                                                    | S49 |
|      | crystal data and structure refinement for <b>3ac</b>                                                                    | S50 |
|      | crystal data and structure refinement for <b>3ac'</b>                                                                   | S51 |
|      | crystal data and structure refinement for <b>3ah</b>                                                                    | S52 |
|      | crystal data and structure refinement for <b>5bc</b>                                                                    | S53 |
|      | crystal data and structure refinement for <b>5cf</b>                                                                    | S54 |
|      | crystal data and structure refinement for <b>5bj</b>                                                                    | S55 |
|      | crystal data and structure refinement for <b>5bd'</b>                                                                   | S56 |
| IV.  | Copies of NMR spectra                                                                                                   |     |
|      | for <b>2j</b>                                                                                                           | S57 |
|      | for compounds of series <b>3</b>                                                                                        | S59 |
|      | for compounds of series <b>5</b>                                                                                        | S88 |

## I. Structures disclosure

3-nitrobenzofuran:

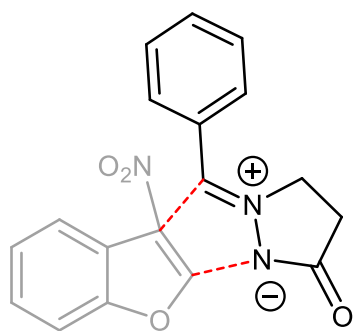

*anti exo*

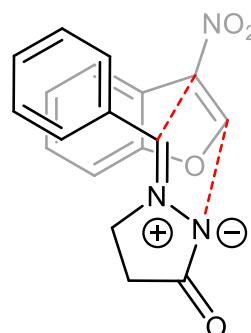

*anti endo*

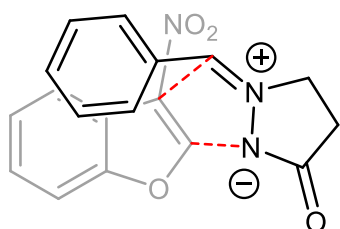

*syn exo*

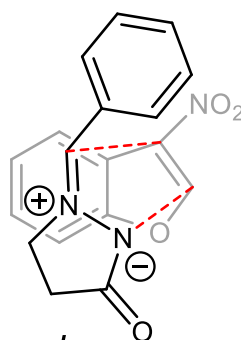

*syn endo*

---

3-nitro-4*H*-chromene:

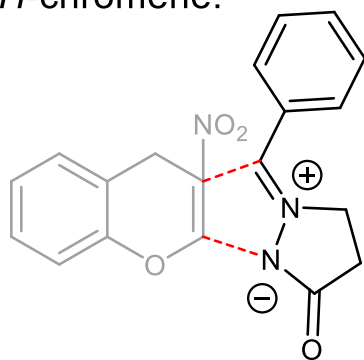

*anti exo*

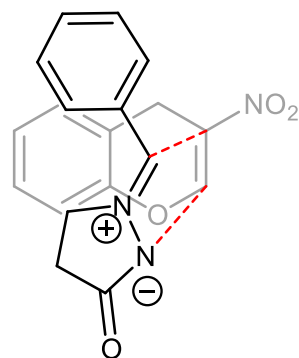

*anti endo*

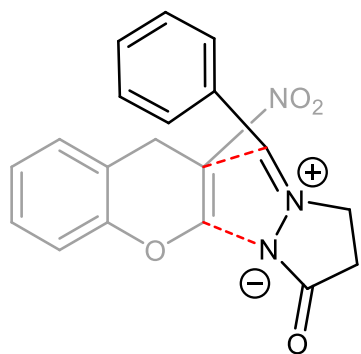

*syn exo*

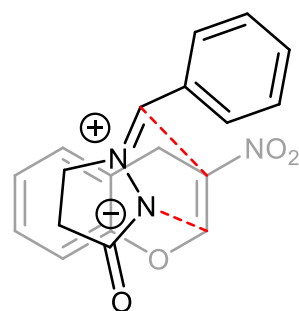

*syn endo*

II. Cartesian coordinates of the geometries optimized in DMSO

at the level of the DFT theory with mPW1PW91 functional in the 6-311 ++ (d, p)

| <b>3-Nitrobenzofuran + azomethine imine 2a</b> |                                                                                      |            |            |            |
|------------------------------------------------|--------------------------------------------------------------------------------------|------------|------------|------------|
| <i>anti-2a</i>                                 | 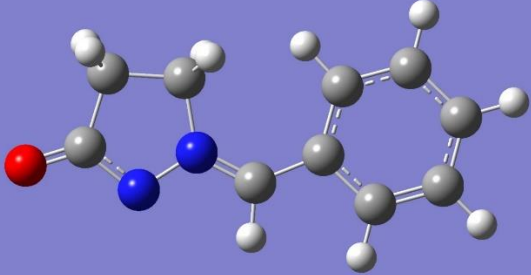   |            |            |            |
|                                                |                                                                                      | X          | Y          | Z          |
| 1                                              | O                                                                                    | -4.5080000 | -0.5634000 | -0.0072000 |
| 2                                              | N                                                                                    | -1.1380000 | -0.3068000 | -0.0298000 |
| 3                                              | N                                                                                    | -2.2778000 | -1.0408000 | -0.0609000 |
| 4                                              | C                                                                                    | 1.3564000  | -0.3552000 | -0.0241000 |
| 5                                              | C                                                                                    | 0.0157000  | -0.9008000 | -0.0443000 |
| 6                                              | C                                                                                    | 2.3778000  | -1.3230000 | 0.0404000  |
| 7                                              | H                                                                                    | 2.1078000  | -2.3728000 | 0.0708000  |
| 8                                              | C                                                                                    | -3.3352000 | -0.2006000 | 0.0037000  |
| 9                                              | C                                                                                    | 1.7322000  | 0.9993000  | -0.0717000 |
| 10                                             | H                                                                                    | 0.9990000  | 1.7879000  | -0.1374000 |
| 11                                             | C                                                                                    | -1.3810000 | 1.1612000  | 0.0227000  |
| 12                                             | H                                                                                    | -0.9677000 | 1.6060000  | -0.8812000 |
| 13                                             | H                                                                                    | -0.8709000 | 1.5626000  | 0.8966000  |
| 14                                             | C                                                                                    | -2.8870000 | 1.2492000  | 0.0974000  |
| 15                                             | H                                                                                    | -3.2392000 | 1.6756000  | 1.0375000  |
| 16                                             | H                                                                                    | -3.3202000 | 1.8234000  | -0.7216000 |
| 17                                             | C                                                                                    | 3.0727000  | 1.3557000  | -0.0469000 |
| 18                                             | H                                                                                    | 3.3406000  | 2.4052000  | -0.0863000 |
| 19                                             | C                                                                                    | 3.7134000  | -0.9584000 | 0.0674000  |
| 20                                             | H                                                                                    | 4.4782000  | -1.7246000 | 0.1199000  |
| 21                                             | C                                                                                    | 4.0680000  | 0.3862000  | 0.0251000  |
| 22                                             | H                                                                                    | 5.1118000  | 0.6774000  | 0.0447000  |
| 23                                             | H                                                                                    | -0.0626000 | -1.9815000 | -0.0687000 |
| <i>syn-2a</i>                                  |  |            |            |            |
|                                                |                                                                                      | X          | Y          | Z          |
| 1                                              | O                                                                                    | -3.4061000 | 1.8561000  | 0.0002000  |
| 2                                              | N                                                                                    | -1.1384000 | -0.6313000 | -0.0001000 |
| 3                                              | N                                                                                    | -1.4537000 | 0.6745000  | -0.0001000 |
| 4                                              | C                                                                                    | 1.3270000  | -0.4160000 | 0.0000000  |

|    |   |            |            |            |
|----|---|------------|------------|------------|
| 5  | C | 0.0645000  | -1.1186000 | 0.0000000  |
| 6  | C | 1.4844000  | 0.9807000  | -0.0001000 |
| 7  | H | 0.6084000  | 1.6121000  | -0.0001000 |
| 8  | C | -2.8082000 | 0.7879000  | -0.0001000 |
| 9  | C | 2.4785000  | -1.2251000 | 0.0000000  |
| 10 | H | 2.3676000  | -2.3042000 | 0.0001000  |
| 11 | C | -2.3270000 | -1.5445000 | -0.0001000 |
| 12 | H | -2.2691000 | -2.1698000 | 0.8887000  |
| 13 | H | -2.2693000 | -2.1694000 | -0.8892000 |
| 14 | C | -3.4840000 | -0.5766000 | 0.0002000  |
| 15 | H | -4.1165000 | -0.6656000 | -0.8834000 |
| 16 | H | -4.1159000 | -0.6655000 | 0.8843000  |
| 17 | C | 3.7429000  | -0.6606000 | 0.0000000  |
| 18 | H | 4.6183000  | -1.2998000 | 0.0001000  |
| 19 | C | 2.7567000  | 1.5362000  | -0.0001000 |
| 20 | H | 2.8653000  | 2.6149000  | -0.0001000 |
| 21 | C | 3.8868000  | 0.7248000  | 0.0000000  |
| 22 | H | 4.8757000  | 1.1689000  | 0.0000000  |
| 23 | H | 0.0994000  | -2.2014000 | 0.0000000  |

3-nitro-  
benzofuran

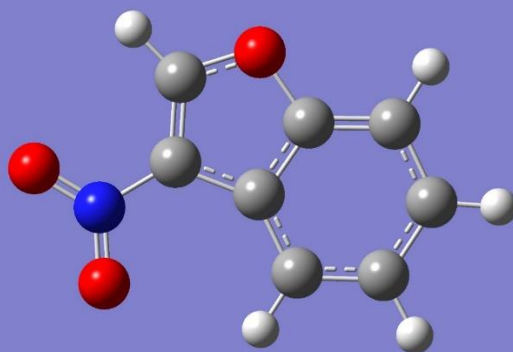

|    |   | X          | Y          | Z         |
|----|---|------------|------------|-----------|
| 1  | O | 0.3115000  | 2.0289000  | 0.0000000 |
| 2  | O | -3.3149000 | 0.1702000  | 0.0000000 |
| 3  | N | -2.2642000 | -0.4548000 | 0.0000000 |
| 4  | O | -2.1891000 | -1.6747000 | 0.0000000 |
| 5  | C | -1.0446000 | 0.2722000  | 0.0000000 |
| 6  | C | 0.2965000  | -0.2474000 | 0.0000000 |
| 7  | C | -0.9636000 | 1.6308000  | 0.0000000 |
| 8  | C | 1.0939000  | 0.9011000  | 0.0000000 |
| 9  | C | 0.9101000  | -1.5017000 | 0.0000000 |
| 10 | H | 0.3217000  | -2.4089000 | 0.0000000 |
| 11 | C | 2.2962000  | -1.5419000 | 0.0000000 |
| 12 | C | 3.0675000  | -0.3717000 | 0.0000000 |
| 13 | H | 4.1483000  | -0.4465000 | 0.0000000 |
| 14 | C | 2.4752000  | 0.8840000  | 0.0000000 |
| 15 | H | 3.0562000  | 1.7974000  | 0.0000000 |
| 16 | H | 2.7973000  | -2.5028000 | 0.0000000 |
| 17 | H | -1.7210000 | 2.3986000  | 0.0000000 |

*anti-endo* cycloaddition

TS1

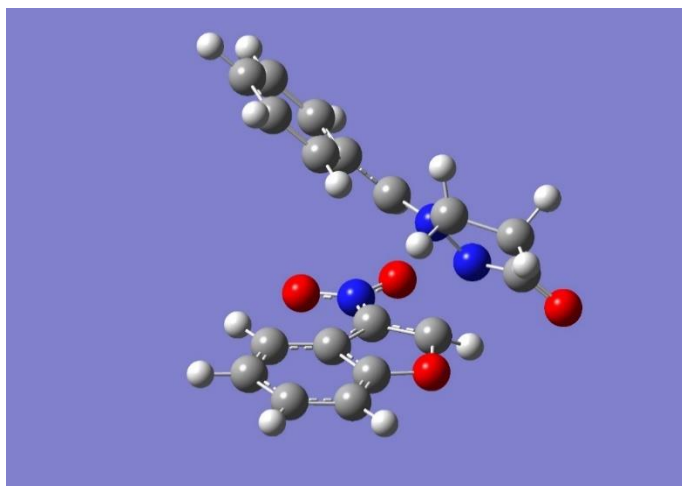

|    |   | X          | Y          | Z          |
|----|---|------------|------------|------------|
| 1  | O | -2.7157000 | -0.1534000 | -0.1791000 |
| 2  | O | -0.6231000 | 0.0555000  | 3.3113000  |
| 3  | O | -3.0349000 | 3.0278000  | 0.0382000  |
| 4  | N | 0.0315000  | 1.6078000  | -0.1560000 |
| 5  | N | -1.1481000 | 1.8222000  | 0.4980000  |
| 6  | N | -0.4852000 | -0.8770000 | 2.4974000  |
| 7  | O | 0.2301000  | -1.8637000 | 2.7300000  |
| 8  | C | -1.1339000 | -0.7980000 | 1.2906000  |
| 9  | C | 2.3116000  | 0.6725000  | 0.0052000  |
| 10 | C | -1.1022000 | -1.7309000 | 0.1984000  |
| 11 | C | 1.0262000  | 1.0989000  | 0.5061000  |
| 12 | H | 0.8607000  | 1.0513000  | 1.5766000  |
| 13 | C | -2.0718000 | 0.2204000  | 0.9644000  |
| 14 | H | -2.6924000 | 0.7396000  | 1.6782000  |
| 15 | C | -2.0759000 | -1.2618000 | -0.6899000 |
| 16 | C | -0.3793000 | -2.8748000 | -0.1373000 |
| 17 | H | 0.3737000  | -3.2656000 | 0.5336000  |
| 18 | C | -0.6597000 | -3.4982000 | -1.3511000 |
| 19 | C | 3.3248000  | 0.5407000  | 0.9705000  |
| 20 | H | 3.1011000  | 0.7666000  | 2.0071000  |
| 21 | C | -1.6323000 | -3.0002000 | -2.2192000 |
| 22 | H | -1.8276000 | -3.5079000 | -3.1564000 |
| 23 | C | -2.3660000 | -1.8571000 | -1.8966000 |
| 24 | H | -3.1296000 | -1.4616000 | -2.5550000 |
| 25 | C | -1.9207000 | 2.6679000  | -0.2778000 |
| 26 | C | 2.5988000  | 0.3490000  | -1.3311000 |
| 27 | H | 1.8324000  | 0.3880000  | -2.0921000 |
| 28 | C | -0.0133000 | 2.0628000  | -1.5657000 |
| 29 | H | -0.2218000 | 1.2056000  | -2.2067000 |
| 30 | H | 0.9490000  | 2.4971000  | -1.8251000 |
| 31 | C | -1.1647000 | 3.0490000  | -1.5328000 |
| 32 | H | -0.8175000 | 4.0805000  | -1.4376000 |
| 33 | H | -1.8176000 | 2.9803000  | -2.4012000 |

|    |                                                                                     |            |            |            |
|----|-------------------------------------------------------------------------------------|------------|------------|------------|
| 34 | C                                                                                   | 3.8730000  | -0.0662000 | -1.6841000 |
| 35 | H                                                                                   | 4.0834000  | -0.3212000 | -2.7160000 |
| 36 | C                                                                                   | 4.5984000  | 0.1369000  | 0.6061000  |
| 37 | H                                                                                   | 5.3724000  | 0.0496000  | 1.3594000  |
| 38 | C                                                                                   | 4.8761000  | -0.1648000 | -0.7235000 |
| 39 | H                                                                                   | 5.8702000  | -0.4874000 | -1.0106000 |
| 40 | H                                                                                   | -0.1094000 | -4.3907000 | -1.6267000 |
| IM | 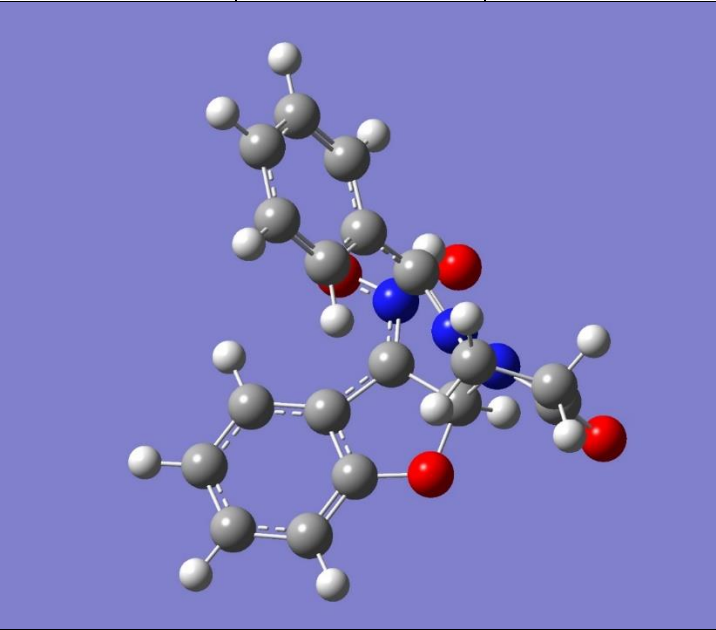 |            |            |            |
|    |                                                                                     | X          | Y          | Z          |
| 1  | O                                                                                   | -2.4579000 | 0.5402000  | -0.5665000 |
| 2  | O                                                                                   | -0.5380000 | 0.3698000  | 3.0718000  |
| 3  | O                                                                                   | -2.1143000 | 3.6658000  | 0.1317000  |
| 4  | N                                                                                   | 0.4717000  | 1.4588000  | -0.2105000 |
| 5  | N                                                                                   | -0.7223000 | 1.8566000  | 0.3682000  |
| 6  | N                                                                                   | -0.7961000 | -0.6599000 | 2.3779000  |
| 7  | O                                                                                   | -0.5448000 | -1.8148000 | 2.8034000  |
| 8  | C                                                                                   | -1.2941000 | -0.4839000 | 1.1455000  |
| 9  | C                                                                                   | 2.4687000  | 0.0596000  | 0.0050000  |
| 10 | C                                                                                   | -1.6672000 | -1.4827000 | 0.1886000  |
| 11 | C                                                                                   | 1.2603000  | 0.6845000  | 0.4724000  |
| 12 | H                                                                                   | 0.9803000  | 0.5621000  | 1.5162000  |
| 13 | C                                                                                   | -1.7708000 | 0.8409000  | 0.6547000  |
| 14 | H                                                                                   | -2.4540000 | 1.3642000  | 1.3240000  |
| 15 | C                                                                                   | -2.3373000 | -0.7959000 | -0.8329000 |
| 16 | C                                                                                   | -1.4959000 | -2.8616000 | 0.0787000  |
| 17 | H                                                                                   | -0.9906000 | -3.4082000 | 0.8634000  |
| 18 | C                                                                                   | -1.9938000 | -3.5080000 | -1.0540000 |
| 19 | C                                                                                   | 3.3627000  | -0.3755000 | 0.9977000  |
| 20 | H                                                                                   | 3.1135000  | -0.2230000 | 2.0416000  |
| 21 | C                                                                                   | -2.6489000 | -2.7997000 | -2.0579000 |
| 22 | H                                                                                   | -3.0294000 | -3.3225000 | -2.9279000 |
| 23 | C                                                                                   | -2.8323000 | -1.4157000 | -1.9583000 |
| 24 | H                                                                                   | -3.3491000 | -0.8538000 | -2.7270000 |
| 25 | C                                                                                   | -1.0977000 | 3.0946000  | -0.1660000 |

|    |   |            |            |            |
|----|---|------------|------------|------------|
| 26 | C | 2.7723000  | -0.1682000 | -1.3473000 |
| 27 | H | 2.0729000  | 0.1037000  | -2.1264000 |
| 28 | C | 0.7111000  | 2.2229000  | -1.4486000 |
| 29 | H | 0.2694000  | 1.6893000  | -2.2913000 |
| 30 | H | 1.7804000  | 2.3448000  | -1.5950000 |
| 31 | C | -0.0272000 | 3.5180000  | -1.1398000 |
| 32 | H | 0.6260000  | 4.2474000  | -0.6537000 |
| 33 | H | -0.4798000 | 3.9767000  | -2.0162000 |
| 34 | C | 3.9595000  | -0.7922000 | -1.6892000 |
| 35 | H | 4.1863000  | -0.9777000 | -2.7321000 |
| 36 | C | 4.5553000  | -0.9834000 | 0.6443000  |
| 37 | H | 5.2458000  | -1.3063000 | 1.4139000  |
| 38 | C | 4.8555000  | -1.1898000 | -0.6988000 |
| 39 | H | 5.7840000  | -1.6755000 | -0.9762000 |
| 40 | H | -1.8692000 | -4.5807000 | -1.1510000 |

TS2

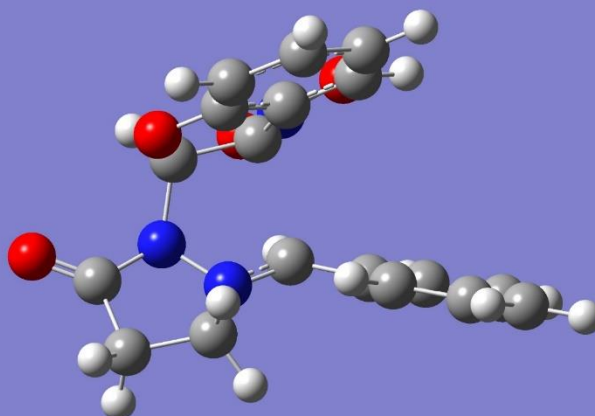

|    |   | X          | Y          | Z          |
|----|---|------------|------------|------------|
| 1  | O | 2.2767000  | 1.0972000  | -0.1098000 |
| 2  | O | 0.5315000  | -0.4517000 | 3.2225000  |
| 3  | O | 4.1345000  | -1.4586000 | -0.1591000 |
| 4  | N | 0.7271000  | -1.5385000 | -0.3565000 |
| 5  | N | 1.8952000  | -1.2213000 | 0.3219000  |
| 6  | N | -0.0388000 | 0.3857000  | 2.5028000  |
| 7  | O | -1.0523000 | 0.9969000  | 2.8609000  |
| 8  | C | 0.4262000  | 0.5389000  | 1.2024000  |
| 9  | C | -1.7052000 | -1.2402000 | -0.1284000 |
| 10 | C | 0.1005000  | 1.6741000  | 0.3627000  |
| 11 | C | -0.3556000 | -1.3422000 | 0.3979000  |
| 12 | H | -0.2490000 | -1.7096000 | 1.4175000  |
| 13 | C | 1.8518000  | 0.1596000  | 0.8852000  |
| 14 | H | 2.5445000  | 0.1914000  | 1.7222000  |
| 15 | C | 1.2290000  | 1.9122000  | -0.4253000 |
| 16 | C | -1.0378000 | 2.4558000  | 0.1827000  |
| 17 | H | -1.9179000 | 2.2886000  | 0.7887000  |
| 18 | C | -1.0093000 | 3.4613000  | -0.7813000 |
| 19 | C | -2.7561000 | -1.6627000 | 0.6982000  |
| 20 | H | -2.5317000 | -2.0722000 | 1.6767000  |
| 21 | C | 0.1280000  | 3.6753000  | -1.5588000 |
| 22 | H | 0.1290000  | 4.4629000  | -2.3037000 |
| 23 | C | 1.2741000  | 2.8974000  | -1.3916000 |
| 24 | H | 2.1670000  | 3.0641000  | -1.9816000 |

|    |   |            |            |            |
|----|---|------------|------------|------------|
| 25 | C | 2.9832000  | -1.6463000 | -0.4553000 |
| 26 | C | -1.9986000 | -0.6961000 | -1.3866000 |
| 27 | H | -1.2068000 | -0.3298000 | -2.0265000 |
| 28 | C | 0.9948000  | -1.7853000 | -1.7740000 |
| 29 | H | 0.9609000  | -0.8623000 | -2.3587000 |
| 30 | H | 0.2701000  | -2.4968000 | -2.1627000 |
| 31 | C | 2.4182000  | -2.3319000 | -1.6815000 |
| 32 | H | 2.4224000  | -3.4124000 | -1.5126000 |
| 33 | H | 3.0328000  | -2.1087000 | -2.5512000 |
| 34 | C | -3.3154000 | -0.6042000 | -1.8123000 |
| 35 | H | -3.5357000 | -0.1815000 | -2.7856000 |
| 36 | C | -4.0697000 | -1.5705000 | 0.2648000  |
| 37 | H | -4.8747000 | -1.9075000 | 0.9072000  |
| 38 | C | -4.3510000 | -1.0437000 | -0.9924000 |
| 39 | H | -5.3780000 | -0.9696000 | -1.3314000 |
| 40 | H | -1.8841000 | 4.0837000  | -0.9291000 |

IM-TS

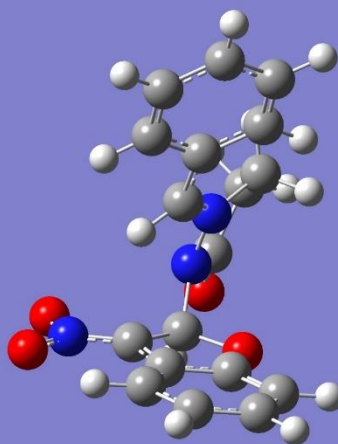

|    |   | X          | Y          | Z          |
|----|---|------------|------------|------------|
| 1  | O | -1.6944000 | 0.2879000  | -1.5016000 |
| 2  | O | -2.2780000 | 1.0657000  | 2.4925000  |
| 3  | O | -1.8914000 | 3.7455000  | -0.4702000 |
| 4  | N | 0.6366000  | 1.4518000  | -0.1798000 |
| 5  | N | -0.6877000 | 1.8409000  | -0.0517000 |
| 6  | N | -2.1618000 | -0.1070000 | 2.0343000  |
| 7  | O | -2.2932000 | -1.1167000 | 2.7776000  |
| 8  | C | -1.8775000 | -0.2671000 | 0.7352000  |
| 9  | C | 2.4349000  | -0.1290000 | 0.3529000  |
| 10 | C | -1.7916000 | -1.4773000 | -0.0233000 |
| 11 | C | 1.1094000  | 0.4271000  | 0.4524000  |
| 12 | H | 0.4119000  | -0.0564000 | 1.1274000  |
| 13 | C | -1.8013000 | 0.8869000  | -0.2065000 |
| 14 | H | -2.6692000 | 1.5500000  | -0.1731000 |
| 15 | C | -1.6695000 | -1.0766000 | -1.3632000 |
| 16 | C | -1.7984000 | -2.8393000 | 0.2733000  |
| 17 | H | -1.8960000 | -3.1670000 | 1.2996000  |
| 18 | C | -1.6849000 | -3.7550000 | -0.7763000 |
| 19 | C | 2.8304000  | -0.9352000 | 1.4337000  |
| 20 | H | 2.1439000  | -1.0943000 | 2.2572000  |
| 21 | C | -1.5638000 | -3.3286000 | -2.0949000 |
| 22 | H | -1.4782000 | -4.0559000 | -2.8940000 |
| 23 | C | -1.5562000 | -1.9624000 | -2.4087000 |
| 24 | H | -1.4704000 | -1.6151000 | -3.4315000 |
| 25 | C | -0.8302000 | 3.1770000  | -0.4208000 |
| 26 | C | 3.3068000  | 0.0459000  | -0.7342000 |
| 27 | H | 3.0051000  | 0.6063000  | -1.6082000 |



|    |   |            |            |            |
|----|---|------------|------------|------------|
| 28 | C | 1.3699000  | 2.4696000  | -0.9617000 |
| 29 | H | 1.3612000  | 2.1672000  | -2.0095000 |
| 30 | H | 2.3887000  | 2.5336000  | -0.5913000 |
| 31 | C | 0.5393000  | 3.7168000  | -0.7255000 |
| 32 | H | 0.8938000  | 4.2840000  | 0.1388000  |
| 33 | H | 0.5004000  | 4.3746000  | -1.5905000 |
| 34 | C | 4.5557000  | -0.5512000 | -0.7143000 |
| 35 | H | 5.2216000  | -0.4257000 | -1.5594000 |
| 36 | C | 4.0895000  | -1.5102000 | 1.4525000  |
| 37 | H | 4.3927000  | -2.1182000 | 2.2961000  |
| 38 | C | 4.9539000  | -1.3163000 | 0.3796000  |
| 39 | H | 5.9360000  | -1.7747000 | 0.3872000  |
| 40 | H | -1.6934000 | -4.8169000 | -0.5568000 |

*anti-exo* cycloaddition

TS1

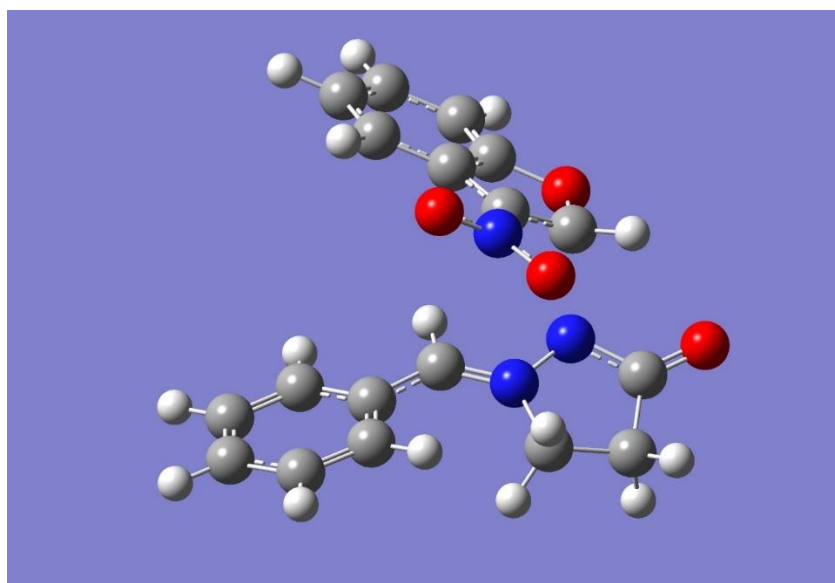

|    |   | X          | Y          | Z          |
|----|---|------------|------------|------------|
| 1  | O | -2.8488000 | 0.5478000  | -0.4816000 |
| 2  | O | -0.0979000 | 1.3758000  | 2.3808000  |
| 3  | O | -1.6374000 | 3.8889000  | -0.7718000 |
| 4  | N | 0.6755000  | 1.4251000  | -0.6264000 |
| 5  | N | -0.6089000 | 1.8525000  | -0.8020000 |
| 6  | N | -0.4443000 | 0.2080000  | 2.1183000  |
| 7  | O | -0.0258000 | -0.7714000 | 2.7525000  |
| 8  | C | -1.3187000 | 0.0079000  | 1.0800000  |
| 9  | C | 2.2029000  | -0.5194000 | -0.5802000 |
| 10 | C | -1.8164000 | -1.2245000 | 0.5355000  |
| 11 | C | 0.9545000  | 0.1707000  | -0.8087000 |
| 12 | H | 0.1448000  | -0.4082000 | -1.2367000 |
| 13 | C | -1.9139000 | 1.0718000  | 0.3535000  |
| 14 | H | -2.1800000 | 2.0344000  | 0.7668000  |
| 15 | C | -2.7321000 | -0.8241000 | -0.4452000 |
| 16 | C | -1.5966000 | -2.5859000 | 0.7383000  |
| 17 | H | -0.8977000 | -2.9235000 | 1.4918000  |
| 18 | C | -2.3049000 | -3.4914000 | -0.0487000 |
| 19 | C | 2.3247000  | -1.7653000 | -1.2195000 |
| 20 | H | 1.5070000  | -2.1266000 | -1.8328000 |
| 21 | C | -3.2094000 | -3.0610000 | -1.0203000 |
| 22 | H | -3.7454000 | -3.7900000 | -1.6167000 |
| 23 | C | -3.4398000 | -1.7010000 | -1.2360000 |
| 24 | H | -4.1424000 | -1.3500000 | -1.9817000 |

|    |   |            |            |            |
|----|---|------------|------------|------------|
| 25 | C | -0.6164000 | 3.2312000  | -0.7462000 |
| 26 | C | 3.2512000  | -0.0715000 | 0.2400000  |
| 27 | H | 3.1754000  | 0.8563000  | 0.7877000  |
| 28 | C | 1.5940000  | 2.5266000  | -0.2463000 |
| 29 | H | 2.5303000  | 2.3997000  | -0.7847000 |
| 30 | H | 1.7649000  | 2.4804000  | 0.8282000  |
| 31 | C | 0.7982000  | 3.7527000  | -0.6424000 |
| 32 | H | 0.8530000  | 4.5568000  | 0.0891000  |
| 33 | H | 1.1027000  | 4.1442000  | -1.6159000 |
| 34 | C | 4.3947000  | -0.8413000 | 0.3840000  |
| 35 | H | 5.1956000  | -0.4903000 | 1.0239000  |
| 36 | C | 3.4763000  | -2.5216000 | -1.0802000 |
| 37 | H | 3.5606000  | -3.4743000 | -1.5892000 |
| 38 | C | 4.5162000  | -2.0591000 | -0.2797000 |
| 39 | H | 5.4168000  | -2.6510000 | -0.1638000 |
| 40 | H | -2.1495000 | -4.5543000 | 0.0979000  |

IM

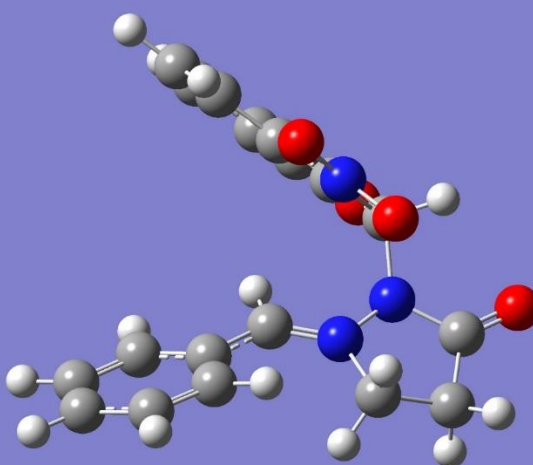

|    |   | X          | Y          | Z          |
|----|---|------------|------------|------------|
| 1  | O | -2.3380000 | 0.6482000  | -1.0963000 |
| 2  | O | -0.1991000 | 1.5868000  | 2.2727000  |
| 3  | O | -1.1520000 | 4.0391000  | -0.7241000 |
| 4  | N | 0.8714000  | 1.2932000  | -0.5014000 |
| 5  | N | -0.3624000 | 1.8940000  | -0.6304000 |
| 6  | N | -0.7091000 | 0.4412000  | 2.0975000  |
| 7  | O | -0.6142000 | -0.4602000 | 2.9674000  |
| 8  | C | -1.3427000 | 0.2010000  | 0.9405000  |
| 9  | C | 2.1714000  | -0.7903000 | -0.4758000 |
| 10 | C | -2.0122000 | -0.9838000 | 0.4989000  |
| 11 | C | 0.9994000  | 0.0196000  | -0.7018000 |
| 12 | H | 0.1406000  | -0.4748000 | -1.1392000 |
| 13 | C | -1.5761000 | 1.2770000  | -0.0627000 |
| 14 | H | -2.1353000 | 2.1394000  | 0.3095000  |
| 15 | C | -2.5800000 | -0.6528000 | -0.7415000 |
| 16 | C | -2.1824000 | -2.2736000 | 0.9985000  |
| 17 | H | -1.7533000 | -2.5442000 | 1.9541000  |
| 18 | C | -2.9175000 | -3.1912000 | 0.2445000  |
| 19 | C | 2.2074000  | -2.0126000 | -1.1681000 |
| 20 | H | 1.3835000  | -2.2797000 | -1.8200000 |
| 21 | C | -3.4692000 | -2.8370000 | -0.9830000 |
| 22 | H | -4.0370000 | -3.5649000 | -1.5511000 |
| 23 | C | -3.3054000 | -1.5447000 | -1.4979000 |
| 24 | H | -3.7341000 | -1.2533000 | -2.4493000 |
| 25 | C | -0.2186000 | 3.2782000  | -0.6932000 |
| 26 | C | 3.2221000  | -0.4623000 | 0.3961000  |

|    |   |            |            |            |
|----|---|------------|------------|------------|
| 27 | H | 3.1969000  | 0.4426000  | 0.9863000  |
| 28 | C | 1.8963000  | 2.3128000  | -0.1953000 |
| 29 | H | 2.8207000  | 2.0399000  | -0.6967000 |
| 30 | H | 2.0360000  | 2.3481000  | 0.8840000  |
| 31 | C | 1.2526000  | 3.5848000  | -0.7186000 |
| 32 | H | 1.4661000  | 4.4562000  | -0.1038000 |
| 33 | H | 1.5462000  | 3.7975000  | -1.7495000 |
| 34 | C | 4.2919000  | -1.3298000 | 0.5407000  |
| 35 | H | 5.0954000  | -1.0775000 | 1.2221000  |
| 36 | C | 3.2899000  | -2.8644000 | -1.0298000 |
| 37 | H | 3.3150000  | -3.7983000 | -1.5782000 |
| 38 | C | 4.3347000  | -2.5228000 | -0.1768000 |
| 39 | H | 5.1787000  | -3.1927000 | -0.0598000 |
| 40 | H | -3.0611000 | -4.1964000 | 0.6249000  |

TS2

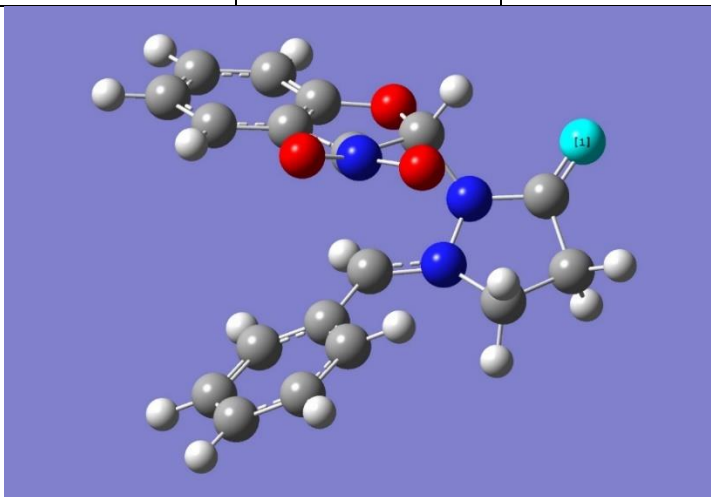

|    |   | X          | Y          | Z          |
|----|---|------------|------------|------------|
| 1  | O | -2.5709000 | 0.7909000  | -0.4762000 |
| 2  | O | 0.4942000  | 1.1099000  | 2.2022000  |
| 3  | O | -1.3787000 | 4.1299000  | -0.0919000 |
| 4  | N | 0.7173000  | 1.4970000  | -0.7074000 |
| 5  | N | -0.5465000 | 2.0372000  | -0.5144000 |
| 6  | N | 0.0161000  | 0.0035000  | 1.8896000  |
| 7  | O | 0.2962000  | -1.0422000 | 2.4877000  |
| 8  | C | -0.7912000 | -0.0425000 | 0.7692000  |
| 9  | C | 1.8861000  | -0.6770000 | -0.6390000 |
| 10 | C | -1.6694000 | -1.1352000 | 0.4118000  |
| 11 | C | 0.7141000  | 0.1672000  | -0.8063000 |
| 12 | H | -0.0624000 | -0.2348000 | -1.4506000 |
| 13 | C | -1.4542000 | 1.2256000  | 0.3048000  |
| 14 | H | -1.8171000 | 1.8710000  | 1.1068000  |
| 15 | C | -2.6830000 | -0.5648000 | -0.3653000 |
| 16 | C | -1.6549000 | -2.5104000 | 0.6213000  |
| 17 | H | -0.8768000 | -2.9638000 | 1.2204000  |
| 18 | C | -2.6699000 | -3.2802000 | 0.0542000  |
| 19 | C | 2.9596000  | -0.3654000 | 0.2076000  |
| 20 | H | 2.9674000  | 0.5506000  | 0.7815000  |
| 21 | C | -3.6707000 | -2.6898000 | -0.7144000 |
| 22 | H | -4.4500000 | -3.3064000 | -1.1474000 |
| 23 | C | -3.6939000 | -1.3113000 | -0.9358000 |
| 24 | H | -4.4729000 | -0.8424000 | -1.5245000 |
| 25 | C | -0.4558000 | 3.4186000  | -0.4059000 |
| 26 | C | 1.8951000  | -1.8972000 | -1.3315000 |
| 27 | H | 1.0605000  | -2.1487000 | -1.9760000 |
| 28 | C | 1.7432000  | 2.5119000  | -0.4312000 |
| 29 | H | 2.5977000  | 2.3434000  | -1.0820000 |

|    |   |            |            |            |
|----|---|------------|------------|------------|
| 30 | H | 2.0495000  | 2.4893000  | 0.6144000  |
| 31 | C | 0.9700000  | 3.7909000  | -0.7352000 |
| 32 | H | 1.2877000  | 4.6421000  | -0.1374000 |
| 33 | H | 1.0255000  | 4.0585000  | -1.7940000 |
| 34 | C | 2.9630000  | -2.7714000 | -1.2038000 |
| 35 | H | 2.9624000  | -3.7066000 | -1.7512000 |
| 36 | C | 4.0233000  | -1.2471000 | 0.3329000  |
| 37 | H | 4.8489000  | -0.9979000 | 0.9891000  |
| 38 | C | 4.0314000  | -2.4461000 | -0.3735000 |
| 39 | H | 4.8675000  | -3.1286000 | -0.2725000 |
| 40 | H | -2.6791000 | -4.3520000 | 0.2147000  |

*syn-endo* cycloaddition

TS1

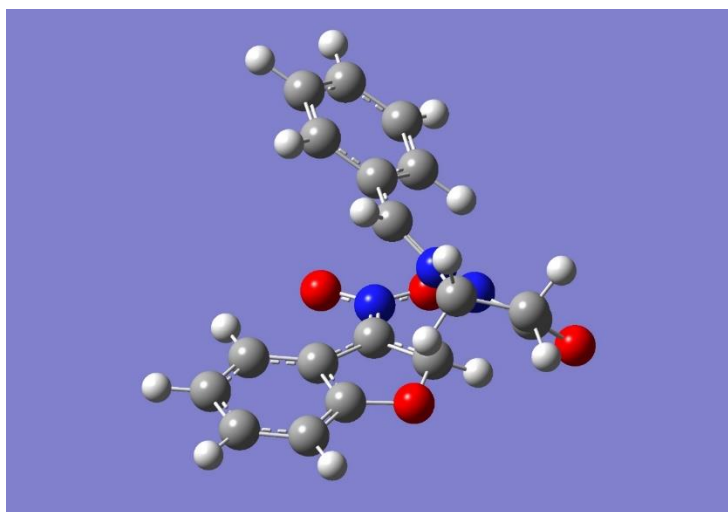

|    |   | X          | Y          | Z          |
|----|---|------------|------------|------------|
| 1  | O | -2.3351000 | 0.2079000  | 0.6616000  |
| 2  | O | 1.1327000  | -0.0322000 | 2.7631000  |
| 3  | O | -1.4480000 | 3.4262000  | 1.4907000  |
| 4  | N | -0.3271000 | 1.4955000  | -1.0466000 |
| 5  | N | -0.3846000 | 1.7933000  | 0.2926000  |
| 6  | N | 0.7157000  | -0.9646000 | 2.0493000  |
| 7  | O | 1.2763000  | -2.0752000 | 2.0118000  |
| 8  | C | -0.3932000 | -0.7607000 | 1.2793000  |
| 9  | C | 1.8963000  | 0.3878000  | -1.1109000 |
| 10 | C | -1.0862000 | -1.6991000 | 0.4430000  |
| 11 | C | 0.6207000  | 0.8234000  | -1.6220000 |
| 12 | H | 0.4213000  | 0.6216000  | -2.6690000 |
| 13 | C | -1.1406000 | 0.4546000  | 1.2938000  |
| 14 | H | -1.2249000 | 1.0863000  | 2.1686000  |
| 15 | C | -2.2662000 | -1.0403000 | 0.0766000  |
| 16 | C | -0.8649000 | -2.9910000 | -0.0310000 |
| 17 | H | 0.0333000  | -3.5281000 | 0.2424000  |
| 18 | C | -1.8299000 | -3.5663000 | -0.8575000 |
| 19 | C | 2.6329000  | -0.4597000 | -1.9577000 |
| 20 | H | 2.1873000  | -0.8033000 | -2.8847000 |
| 21 | C | -2.9916000 | -2.8800000 | -1.2087000 |
| 22 | H | -3.7243000 | -3.3535000 | -1.8517000 |
| 23 | C | -3.2310000 | -1.5857000 | -0.7370000 |
| 24 | H | -4.1322000 | -1.0413000 | -0.9918000 |
| 25 | C | -1.1940000 | 2.9229000  | 0.4191000  |
| 26 | C | 2.4831000  | 0.8514000  | 0.0783000  |
| 27 | H | 1.9268000  | 1.4986000  | 0.7401000  |
| 28 | C | -1.4309000 | 2.1401000  | -1.8027000 |

|    |   |            |            |            |
|----|---|------------|------------|------------|
| 29 | H | -2.2801000 | 1.4567000  | -1.8246000 |
| 30 | H | -1.0949000 | 2.3534000  | -2.8132000 |
| 31 | C | -1.6981000 | 3.3575000  | -0.9397000 |
| 32 | H | -1.1238000 | 4.2261000  | -1.2724000 |
| 33 | H | -2.7496000 | 3.6320000  | -0.8819000 |
| 34 | C | 3.7787000  | 0.4779000  | 0.3941000  |
| 35 | H | 4.2321000  | 0.8465000  | 1.3065000  |
| 36 | C | 3.9177000  | -0.8479000 | -1.6178000 |
| 37 | H | 4.4739000  | -1.5079000 | -2.2728000 |
| 38 | C | 4.4951000  | -0.3737000 | -0.4435000 |
| 39 | H | 5.5052000  | -0.6664000 | -0.1803000 |
| 40 | H | -1.6729000 | -4.5710000 | -1.2336000 |

IM

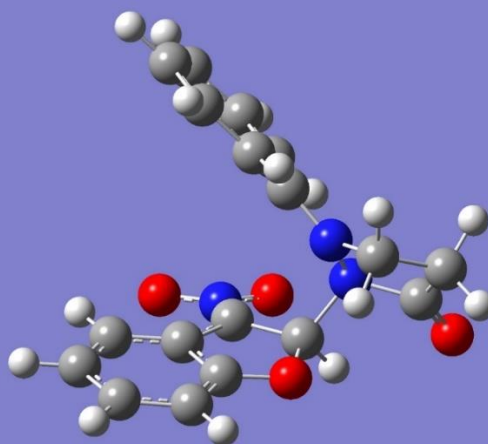

|    |   | X          | Y          | Z          |
|----|---|------------|------------|------------|
| 1  | O | -2.3253000 | 0.2471000  | 0.3636000  |
| 2  | O | 0.9270000  | 0.0713000  | 2.8056000  |
| 3  | O | -1.3923000 | 3.4075000  | 1.5776000  |
| 4  | N | -0.3156000 | 1.5314000  | -1.0547000 |
| 5  | N | -0.4741000 | 1.7144000  | 0.3198000  |
| 6  | N | 0.5635000  | -0.9026000 | 2.0874000  |
| 7  | O | 1.0768000  | -2.0425000 | 2.2253000  |
| 8  | C | -0.3799000 | -0.7024000 | 1.1543000  |
| 9  | C | 1.8808000  | 0.3564000  | -1.1019000 |
| 10 | C | -1.0760000 | -1.6857000 | 0.3787000  |
| 11 | C | 0.6638000  | 0.9071000  | -1.6294000 |
| 12 | H | 0.5362000  | 0.8480000  | -2.7059000 |
| 13 | C | -1.1248000 | 0.5759000  | 1.0651000  |
| 14 | H | -1.3578000 | 1.0336000  | 2.0271000  |
| 15 | C | -2.2356000 | -1.0469000 | -0.0864000 |
| 16 | C | -0.8629000 | -3.0204000 | 0.0390000  |
| 17 | H | 0.0171000  | -3.5362000 | 0.3992000  |
| 18 | C | -1.8084000 | -3.6682000 | -0.7604000 |
| 19 | C | 2.6285000  | -0.4231000 | -2.0027000 |
| 20 | H | 2.2244000  | -0.6381000 | -2.9848000 |
| 21 | C | -2.9461000 | -3.0066000 | -1.2120000 |
| 22 | H | -3.6675000 | -3.5293000 | -1.8294000 |
| 23 | C | -3.1793000 | -1.6673000 | -0.8709000 |
| 24 | H | -4.0681000 | -1.1432000 | -1.2014000 |
| 25 | C | -1.0936000 | 2.9776000  | 0.4965000  |
| 26 | C | 2.4128000  | 0.6631000  | 0.1616000  |
| 27 | H | 1.8511000  | 1.2577000  | 0.8680000  |
| 28 | C | -1.2701000 | 2.3922000  | -1.7857000 |
| 29 | H | -2.2318000 | 1.8809000  | -1.8332000 |
| 30 | H | -0.8883000 | 2.5929000  | -2.7819000 |
| 31 | C | -1.3152000 | 3.5968000  | -0.8599000 |

|    |   |            |            |            |
|----|---|------------|------------|------------|
| 32 | H | -0.5039000 | 4.2982000  | -1.0731000 |
| 33 | H | -2.2632000 | 4.1298000  | -0.8778000 |
| 34 | C | 3.6703000  | 0.1981000  | 0.5007000  |
| 35 | H | 4.0871000  | 0.4437000  | 1.4699000  |
| 36 | C | 3.8724000  | -0.9087000 | -1.6392000 |
| 37 | H | 4.4396000  | -1.5184000 | -2.3320000 |
| 38 | C | 4.3963000  | -0.5920000 | -0.3896000 |
| 39 | H | 5.3764000  | -0.9588000 | -0.1068000 |
| 40 | H | -1.6526000 | -4.7070000 | -1.0298000 |

TS2

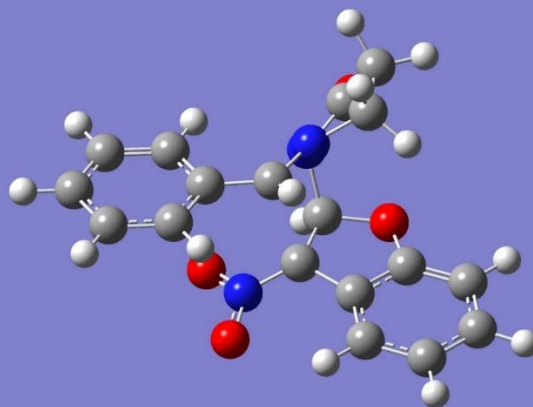

|    |   | X          | Y          | Z          |
|----|---|------------|------------|------------|
| 1  | O | -2.1461000 | 0.7620000  | 0.9594000  |
| 2  | O | 1.3736000  | -0.8348000 | 2.0802000  |
| 3  | O | -0.8997000 | 3.5997000  | 1.3690000  |
| 4  | N | 0.0907000  | 1.3261000  | -0.9575000 |
| 5  | N | -0.0265000 | 1.7126000  | 0.3684000  |
| 6  | N | 0.6046000  | -1.4464000 | 1.3231000  |
| 7  | O | 0.7270000  | -2.6558000 | 1.0812000  |
| 8  | C | -0.3845000 | -0.7299000 | 0.6722000  |
| 9  | C | 2.1196000  | -0.0821000 | -0.7634000 |
| 10 | C | -1.6040000 | -1.3260000 | 0.1653000  |
| 11 | C | 0.7637000  | 0.2081000  | -1.2014000 |
| 12 | H | 0.4356000  | -0.3157000 | -2.0954000 |
| 13 | C | -0.7349000 | 0.6367000  | 1.1684000  |
| 14 | H | -0.5056000 | 0.8355000  | 2.2116000  |
| 15 | C | -2.6026000 | -0.3636000 | 0.3346000  |
| 16 | C | -1.9279000 | -2.5477000 | -0.4187000 |
| 17 | H | -1.1698000 | -3.3079000 | -0.5507000 |
| 18 | C | -3.2437000 | -2.7662000 | -0.8219000 |
| 19 | C | 2.6978000  | -1.2719000 | -1.2304000 |
| 20 | H | 2.1044000  | -1.9509000 | -1.8324000 |
| 21 | C | -4.2192000 | -1.7845000 | -0.6517000 |
| 22 | H | -5.2366000 | -1.9750000 | -0.9735000 |
| 23 | C | -3.9099000 | -0.5573000 | -0.0630000 |
| 24 | H | -4.6618000 | 0.2075000  | 0.0885000  |
| 25 | C | -0.6552000 | 2.9862000  | 0.3665000  |
| 26 | C | 2.8972000  | 0.8030000  | -0.0028000 |
| 27 | H | 2.4654000  | 1.7242000  | 0.3651000  |
| 28 | C | -0.8840000 | 2.0206000  | -1.8063000 |
| 29 | H | -1.8434000 | 1.4981000  | -1.8234000 |
| 30 | H | -0.4880000 | 2.0999000  | -2.8153000 |
| 31 | C | -0.9660000 | 3.3535000  | -1.0678000 |
| 32 | H | -0.2068000 | 4.0550000  | -1.4249000 |
| 33 | H | -1.9406000 | 3.8350000  | -1.1224000 |
| 34 | C | 4.2263000  | 0.5097000  | 0.2567000  |
| 35 | H | 4.8257000  | 1.2082000  | 0.8293000  |

|    |   |            |            |            |
|----|---|------------|------------|------------|
| 36 | C | 4.0226000  | -1.5680000 | -0.9484000 |
| 37 | H | 4.4596000  | -2.4879000 | -1.3190000 |
| 38 | C | 4.7915000  | -0.6754000 | -0.2081000 |
| 39 | H | 5.8310000  | -0.8996000 | 0.0031000  |
| 40 | H | -3.5114000 | -3.7132000 | -1.2762000 |

*syn-exo* cycloaddition

TS1

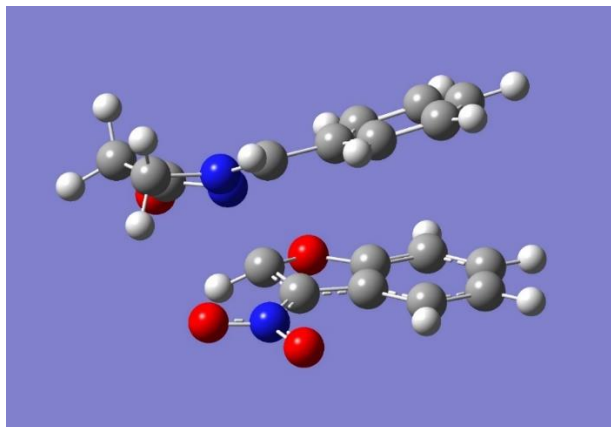

|    |   | X          | Y          | Z          |
|----|---|------------|------------|------------|
| 1  | O | -0.1637000 | -1.7300000 | -1.4260000 |
| 2  | O | -2.0620000 | -1.2583000 | 2.1335000  |
| 3  | O | -3.3134000 | -0.8336000 | -2.2349000 |
| 4  | N | -1.8946000 | 1.0939000  | 0.1450000  |
| 5  | N | -1.7881000 | 0.1843000  | -0.8664000 |
| 6  | N | -0.8163000 | -1.2782000 | 2.0394000  |
| 7  | O | -0.0763000 | -1.2672000 | 3.0374000  |
| 8  | C | -0.2553000 | -1.3198000 | 0.7936000  |
| 9  | C | 0.4508000  | 1.9056000  | 0.2022000  |
| 10 | C | 1.1306000  | -1.3991000 | 0.4336000  |
| 11 | C | -0.9046000 | 1.7511000  | 0.6677000  |
| 12 | H | -1.1871000 | 2.3187000  | 1.5478000  |
| 13 | C | -1.0226000 | -1.4305000 | -0.4079000 |
| 14 | H | -1.9528000 | -1.9806000 | -0.4629000 |
| 15 | C | 1.1221000  | -1.6367000 | -0.9467000 |
| 16 | C | 2.3555000  | -1.3015000 | 1.0923000  |
| 17 | H | 2.3922000  | -1.1202000 | 2.1580000  |
| 18 | C | 3.5208000  | -1.4559000 | 0.3444000  |
| 19 | C | 1.3381000  | 2.5327000  | 1.0937000  |
| 20 | H | 0.9905000  | 2.8060000  | 2.0839000  |
| 21 | C | 3.4782000  | -1.7027000 | -1.0286000 |
| 22 | H | 4.4022000  | -1.8231000 | -1.5821000 |
| 23 | C | 2.2601000  | -1.8001000 | -1.7034000 |
| 24 | H | 2.2087000  | -1.9927000 | -2.7681000 |
| 25 | C | -3.0704000 | -0.0168000 | -1.3753000 |
| 26 | C | 0.8954000  | 1.5753000  | -1.0881000 |
| 27 | H | 0.2197000  | 1.1072000  | -1.7903000 |
| 28 | C | -3.3014000 | 1.2755000  | 0.5883000  |
| 29 | H | -3.4382000 | 2.3038000  | 0.9101000  |
| 30 | H | -3.4878000 | 0.5844000  | 1.4096000  |
| 31 | C | -4.0534000 | 0.8882000  | -0.6680000 |
| 32 | H | -4.9836000 | 0.3568000  | -0.4774000 |
| 33 | H | -4.2630000 | 1.7538000  | -1.3019000 |
| 34 | C | 2.1934000  | 1.8785000  | -1.4676000 |
| 35 | H | 2.5263000  | 1.6367000  | -2.4699000 |
| 36 | C | 2.6417000  | 2.8040000  | 0.7147000  |
| 37 | H | 3.3199000  | 3.2782000  | 1.4142000  |

|    |                                                                                    |            |            |            |
|----|------------------------------------------------------------------------------------|------------|------------|------------|
| 38 | C                                                                                  | 3.0710000  | 2.4802000  | -0.5694000 |
| 39 | H                                                                                  | 4.0879000  | 2.7017000  | -0.8728000 |
| 40 | H                                                                                  | 4.4818000  | -1.3867000 | 0.8416000  |
| IM | 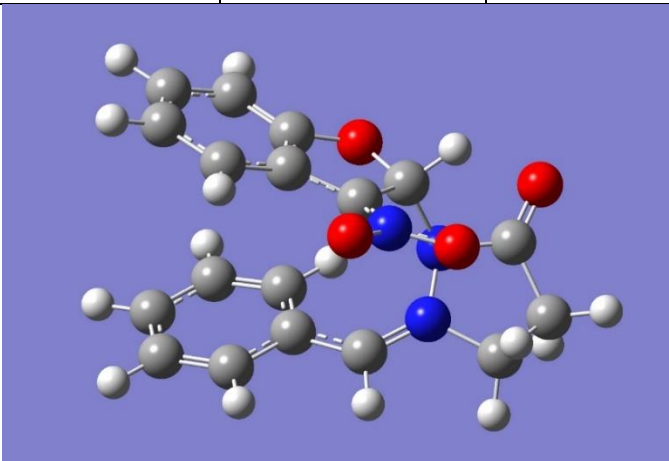 |            |            |            |
|    |                                                                                    | X          | Y          | Z          |
| 1  | O                                                                                  | -0.0391000 | 0.9011000  | -1.7723000 |
| 2  | O                                                                                  | 2.1160000  | 1.7424000  | 1.5910000  |
| 3  | O                                                                                  | 3.3056000  | 0.5203000  | -2.2957000 |
| 4  | N                                                                                  | 1.9146000  | -0.9361000 | 0.4472000  |
| 5  | N                                                                                  | 1.8115000  | -0.2032000 | -0.7180000 |
| 6  | N                                                                                  | 0.8508000  | 1.7820000  | 1.5794000  |
| 7  | O                                                                                  | 0.1984000  | 2.1853000  | 2.5731000  |
| 8  | C                                                                                  | 0.2142000  | 1.3698000  | 0.4718000  |
| 9  | C                                                                                  | -0.3973000 | -1.8278000 | 0.6114000  |
| 10 | C                                                                                  | -1.1778000 | 1.4533000  | 0.1510000  |
| 11 | C                                                                                  | 0.9402000  | -1.5276000 | 1.0605000  |
| 12 | H                                                                                  | 1.2306000  | -1.9150000 | 2.0322000  |
| 13 | C                                                                                  | 0.9579000  | 1.0369000  | -0.7685000 |
| 14 | H                                                                                  | 1.6671000  | 1.8035000  | -1.0901000 |
| 15 | C                                                                                  | -1.2640000 | 1.1600000  | -1.2184000 |
| 16 | C                                                                                  | -2.3435000 | 1.7540000  | 0.8532000  |
| 17 | H                                                                                  | -2.2952000 | 1.9874000  | 1.9084000  |
| 18 | C                                                                                  | -3.5569000 | 1.7606000  | 0.1620000  |
| 19 | C                                                                                  | -1.3321000 | -2.1606000 | 1.6047000  |
| 20 | H                                                                                  | -1.0474000 | -2.0919000 | 2.6486000  |
| 21 | C                                                                                  | -3.6123000 | 1.4733000  | -1.1991000 |
| 22 | H                                                                                  | -4.5648000 | 1.4881000  | -1.7164000 |
| 23 | C                                                                                  | -2.4494000 | 1.1689000  | -1.9169000 |
| 24 | H                                                                                  | -2.4770000 | 0.9490000  | -2.9774000 |
| 25 | C                                                                                  | 3.0813000  | -0.1395000 | -1.3148000 |
| 26 | C                                                                                  | -0.7481000 | -1.9530000 | -0.7409000 |
| 27 | H                                                                                  | -0.0294000 | -1.7275000 | -1.5171000 |
| 28 | C                                                                                  | 3.3359000  | -1.0441000 | 0.8501000  |
| 29 | H                                                                                  | 3.4789000  | -1.9738000 | 1.3917000  |
| 30 | H                                                                                  | 3.5728000  | -0.1818000 | 1.4710000  |
| 31 | C                                                                                  | 4.0278000  | -0.9788000 | -0.5000000 |
| 32 | H                                                                                  | 5.0088000  | -0.5106000 | -0.4651000 |
| 33 | H                                                                                  | 4.1172000  | -1.9665000 | -0.9601000 |
| 34 | C                                                                                  | -2.0131000 | -2.4025000 | -1.0813000 |
| 35 | H                                                                                  | -2.2755000 | -2.5188000 | -2.1261000 |
| 36 | C                                                                                  | -2.6060000 | -2.5733000 | 1.2529000  |
| 37 | H                                                                                  | -3.3276000 | -2.8143000 | 2.0241000  |
| 38 | C                                                                                  | -2.9463000 | -2.6994000 | -0.0910000 |
| 39 | H                                                                                  | -3.9376000 | -3.0391000 | -0.3684000 |
| 40 | H                                                                                  | -4.4705000 | 1.9981000  | 0.6956000  |



TS2

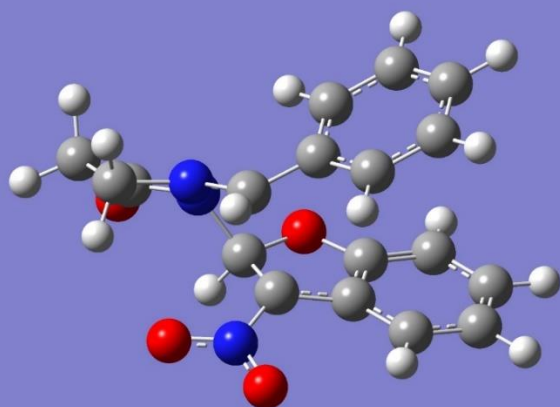

|    |   | X          | Y          | Z          |
|----|---|------------|------------|------------|
| 1  | O | -0.0327000 | -0.4896000 | 1.8845000  |
| 2  | O | 2.1785000  | -2.0026000 | -1.1740000 |
| 3  | O | 3.4623000  | -0.0358000 | 2.2528000  |
| 4  | N | 1.8408000  | 0.8917000  | -0.5998000 |
| 5  | N | 1.8335000  | 0.4254000  | 0.7058000  |
| 6  | N | 0.9343000  | -2.0078000 | -1.2155000 |
| 7  | O | 0.2963000  | -2.6547000 | -2.0555000 |
| 8  | C | 0.2607000  | -1.2150000 | -0.3032000 |
| 9  | C | -0.5470000 | 1.4920000  | -0.8634000 |
| 10 | C | -1.1259000 | -1.3777000 | 0.0631000  |
| 11 | C | 0.7007000  | 0.8601000  | -1.2793000 |
| 12 | H | 0.8387000  | 0.7493000  | -2.3521000 |
| 13 | C | 0.9876000  | -0.7715000 | 0.9303000  |
| 14 | H | 1.6567000  | -1.5266000 | 1.3483000  |
| 15 | C | -1.2306000 | -0.8919000 | 1.3717000  |
| 16 | C | -2.2633000 | -1.8522000 | -0.5840000 |
| 17 | H | -2.1979000 | -2.2329000 | -1.5942000 |
| 18 | C | -3.4762000 | -1.8358000 | 0.1027000  |
| 19 | C | -1.6407000 | 1.4020000  | -1.7341000 |
| 20 | H | -1.5444000 | 0.8325000  | -2.6520000 |
| 21 | C | -3.5555000 | -1.3441000 | 1.4041000  |
| 22 | H | -4.5091000 | -1.3384000 | 1.9197000  |
| 23 | C | -2.4231000 | -0.8635000 | 2.0648000  |
| 24 | H | -2.4720000 | -0.4915000 | 3.0809000  |
| 25 | C | 3.1437000  | 0.4484000  | 1.1963000  |
| 26 | C | -0.6655000 | 2.2472000  | 0.3101000  |
| 27 | H | 0.1753000  | 2.3401000  | 0.9859000  |
| 28 | C | 3.2138000  | 0.9540000  | -1.1265000 |
| 29 | H | 3.2889000  | 1.8010000  | -1.8036000 |
| 30 | H | 3.4724000  | 0.0298000  | -1.6420000 |
| 31 | C | 4.0068000  | 1.1285000  | 0.1630000  |
| 32 | H | 4.9925000  | 0.6692000  | 0.1397000  |
| 33 | H | 4.1139000  | 2.1830000  | 0.4322000  |
| 34 | C | -1.8556000 | 2.8980000  | 0.5979000  |
| 35 | H | -1.9350000 | 3.4917000  | 1.5013000  |
| 36 | C | -2.8314000 | 2.0466000  | -1.4344000 |
| 37 | H | -3.6706000 | 1.9720000  | -2.1162000 |
| 38 | C | -2.9424000 | 2.7953000  | -0.2668000 |
| 39 | H | -3.8704000 | 3.3052000  | -0.0344000 |
| 40 | H | -4.3697000 | -2.2093000 | -0.3842000 |

*cis*-product

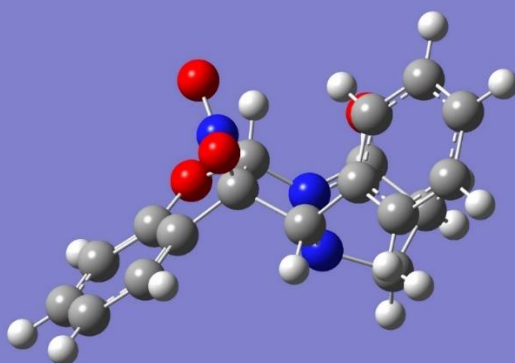

|    |   | X          | Y          | Z          |
|----|---|------------|------------|------------|
| 1  | O | -2.0787000 | 1.3950000  | 1.0250000  |
| 2  | O | -0.5578000 | -1.3655000 | 2.4547000  |
| 3  | O | 1.2683000  | 3.1573000  | 1.3715000  |
| 4  | N | 0.1510000  | 1.0493000  | -1.2016000 |
| 5  | N | 0.0557000  | 1.7341000  | 0.0437000  |
| 6  | N | -0.4562000 | -1.5832000 | 1.2667000  |
| 7  | O | -0.2267000 | -2.6632000 | 0.7692000  |
| 8  | C | -0.7066000 | -0.4448000 | 0.2958000  |
| 9  | C | 1.7760000  | -0.7576000 | -0.4334000 |
| 10 | C | -2.1265000 | -0.5636000 | -0.1785000 |
| 11 | C | 0.3646000  | -0.3704000 | -0.8203000 |
| 12 | H | 0.0551000  | -0.9822000 | -1.6666000 |
| 13 | C | -0.7152000 | 0.9667000  | 0.9617000  |
| 14 | H | -0.3002000 | 1.0258000  | 1.9649000  |
| 15 | C | -2.8331000 | 0.5331000  | 0.2963000  |
| 16 | C | -2.7531000 | -1.5368000 | -0.9408000 |
| 17 | H | -2.2035000 | -2.3934000 | -1.3132000 |
| 18 | C | -4.1093000 | -1.3860000 | -1.2139000 |
| 19 | C | 2.5450000  | -1.4280000 | -1.3882000 |
| 20 | H | 2.0975000  | -1.6888000 | -2.3416000 |
| 21 | C | -4.8083000 | -0.2808000 | -0.7271000 |
| 22 | H | -5.8643000 | -0.1784000 | -0.9498000 |
| 23 | C | -4.1830000 | 0.7006000  | 0.0365000  |
| 24 | H | -4.7229000 | 1.5618000  | 0.4098000  |
| 25 | C | 1.1137000  | 2.5639000  | 0.3240000  |
| 26 | C | 2.3627000  | -0.4481000 | 0.7969000  |
| 27 | H | 1.8065000  | 0.0537000  | 1.5800000  |
| 28 | C | 1.1983000  | 1.7763000  | -1.9473000 |
| 29 | H | 0.6993000  | 2.4369000  | -2.6573000 |
| 30 | H | 1.8121000  | 1.0714000  | -2.5045000 |
| 31 | C | 1.9819000  | 2.5871000  | -0.9135000 |
| 32 | H | 2.9455000  | 2.1457000  | -0.6489000 |
| 33 | H | 2.1584000  | 3.6145000  | -1.2311000 |
| 34 | C | 3.6854000  | -0.7906000 | 1.0566000  |
| 35 | H | 4.1214000  | -0.5442000 | 2.0181000  |
| 36 | C | 3.8667000  | -1.7690000 | -1.1307000 |
| 37 | H | 4.4448000  | -2.2903000 | -1.8854000 |
| 38 | C | 4.4423000  | -1.4479000 | 0.0939000  |
| 39 | H | 5.4724000  | -1.7156000 | 0.3001000  |
| 40 | H | -4.6246000 | -2.1310000 | -1.8078000 |

*trans*-product

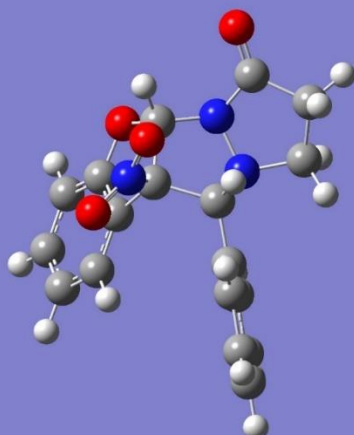

|    |   | X          | Y          | Z          |
|----|---|------------|------------|------------|
| 1  | O | 1.4983290  | 2.2053600  | -0.5248960 |
| 2  | O | 1.3366610  | -0.0765380 | 2.7580680  |
| 3  | O | 4.3235860  | -0.3948880 | 0.0585330  |
| 4  | N | 1.0452840  | -0.8290990 | -1.0790400 |
| 5  | N | 2.1739620  | -0.0567470 | -0.6750040 |
| 6  | N | 0.3580700  | 0.4211260  | 2.2387050  |
| 7  | O | -0.6149740 | 0.8234870  | 2.8328400  |
| 8  | C | 0.3572400  | 0.4915310  | 0.7154100  |
| 9  | C | -1.1090310 | -1.5205170 | -0.0513240 |
| 10 | C | -0.5851250 | 1.5088760  | 0.1709110  |
| 11 | C | 0.2721280  | -0.9735500 | 0.1675120  |
| 12 | H | 0.8057920  | -1.6106170 | 0.8867600  |
| 13 | C | 1.7425160  | 0.9919850  | 0.1839400  |
| 14 | H | 2.4932520  | 1.1793190  | 0.9485200  |
| 15 | C | 0.1614150  | 2.4437980  | -0.5363800 |
| 16 | C | -1.9662770 | 1.6361250  | 0.2482770  |
| 17 | H | -2.5592970 | 0.9191880  | 0.8003300  |
| 18 | C | -2.5721480 | 2.7148000  | -0.3870760 |
| 19 | C | -1.7220750 | -2.2423490 | 0.9736490  |
| 20 | H | -1.1863690 | -2.4185880 | 1.9009770  |
| 21 | C | -1.8041080 | 3.6429950  | -1.0910640 |
| 22 | H | -2.2921970 | 4.4774370  | -1.5818510 |
| 23 | C | -0.4210580 | 3.5248020  | -1.1777210 |
| 24 | H | 0.1799210  | 4.2430340  | -1.7212820 |
| 25 | C | 3.3064670  | -0.8202260 | -0.4426120 |
| 26 | C | -1.7955650 | -1.3193420 | -1.2493110 |
| 27 | H | -1.3226320 | -0.7680490 | -2.0527080 |
| 28 | C | 1.6411880  | -2.0688610 | -1.6186280 |
| 29 | H | 1.7554010  | -1.9400720 | -2.6955820 |
| 30 | H | 0.9681100  | -2.9045130 | -1.4382860 |
| 31 | C | 3.0034340  | -2.2112230 | -0.9431660 |
| 32 | H | 2.9946470  | -2.8757930 | -0.0751690 |
| 33 | H | 3.7830670  | -2.5562570 | -1.6212790 |
| 34 | C | -3.0773400 | -1.8311440 | -1.4148150 |
| 35 | H | -3.6004310 | -1.6751040 | -2.3516400 |
| 36 | C | -3.0087410 | -2.7424540 | 0.8113400  |
| 37 | H | -3.4752940 | -3.2997860 | 1.6156950  |
| 38 | C | -3.6890910 | -2.5381320 | -0.3846400 |
| 39 | H | -4.6896330 | -2.9346920 | -0.5159190 |
| 40 | H | -3.6473290 | 2.8354870  | -0.3333740 |

### 3-Nitro-4*H*-chromene + azomethine imine 2a

3-nitro-4*H*-chromene

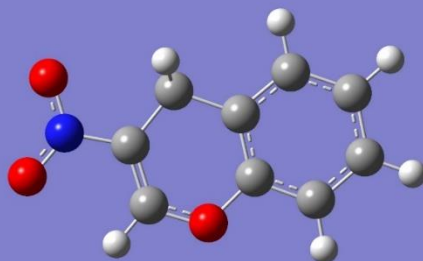

|    |   | X          | Y          | Z          |
|----|---|------------|------------|------------|
| 1  | O | 0.2240000  | -1.7104000 | 0.0001000  |
| 2  | O | -3.6453000 | -0.7217000 | -0.0005000 |
| 3  | O | -3.1914000 | 1.3887000  | -0.0005000 |
| 4  | N | -2.8510000 | 0.2120000  | 0.0004000  |
| 5  | C | 1.2121000  | -0.7368000 | 0.0001000  |
| 6  | C | -0.5136000 | 1.1153000  | 0.0002000  |
| 7  | H | -0.6920000 | 1.7469000  | -0.8756000 |
| 8  | H | -0.6918000 | 1.7468000  | 0.8761000  |
| 9  | C | 0.9101000  | 0.6194000  | 0.0001000  |
| 10 | C | -1.4445000 | -0.0471000 | 0.0002000  |
| 11 | C | 1.9809000  | 1.5127000  | 0.0001000  |
| 12 | C | -1.0487000 | -1.3297000 | 0.0002000  |
| 13 | C | 2.5162000  | -1.2106000 | 0.0000000  |
| 14 | H | 2.6937000  | -2.2793000 | -0.0001000 |
| 15 | C | 3.2947000  | 1.0644000  | 0.0000000  |
| 16 | C | 3.5632000  | -0.3017000 | -0.0001000 |
| 17 | H | 4.5855000  | -0.6607000 | -0.0002000 |
| 18 | H | 1.7704000  | 2.5769000  | 0.0001000  |
| 19 | H | 4.1087000  | 1.7797000  | -0.0001000 |
| 20 | H | -1.7383000 | -2.1627000 | 0.0002000  |

*anti-endo* cycloaddition

TS1

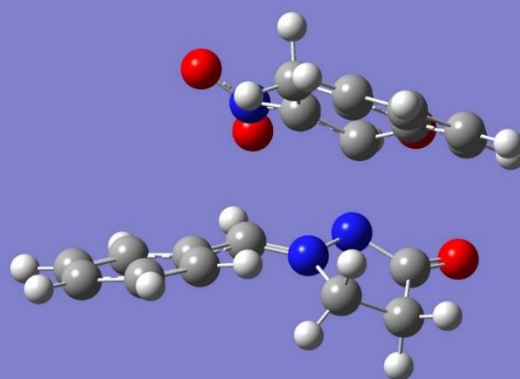

|   |   | X          | Y         | Z          |
|---|---|------------|-----------|------------|
| 1 | O | 2.5780000  | 0.8993000 | 0.3317000  |
| 2 | O | -0.5234000 | 3.3475000 | 0.9177000  |
| 3 | O | 2.5869000  | 1.6370000 | -2.6162000 |
| 4 | O | -1.1533000 | 2.1786000 | 2.6517000  |

|    |                                                                                      |            |            |            |
|----|--------------------------------------------------------------------------------------|------------|------------|------------|
| 5  | N                                                                                    | -0.3010000 | 0.3743000  | -1.3761000 |
| 6  | N                                                                                    | 0.7014000  | 1.3022000  | -1.3612000 |
| 7  | N                                                                                    | -0.4248000 | 2.3318000  | 1.6495000  |
| 8  | C                                                                                    | -4.9049000 | -0.3196000 | -0.0089000 |
| 9  | H                                                                                    | -5.8364000 | 0.1884000  | 0.2108000  |
| 10 | C                                                                                    | 2.4904000  | -0.4261000 | 0.7065000  |
| 11 | C                                                                                    | -4.8568000 | -1.7095000 | -0.0514000 |
| 12 | H                                                                                    | -5.7534000 | -2.2894000 | 0.1350000  |
| 13 | C                                                                                    | -1.4091000 | 0.6477000  | -0.7583000 |
| 14 | H                                                                                    | -1.4940000 | 1.6818000  | -0.4404000 |
| 15 | C                                                                                    | 1.5985000  | 0.9827000  | -2.3652000 |
| 16 | C                                                                                    | 0.5248000  | 0.1158000  | 2.1672000  |
| 17 | H                                                                                    | 0.8185000  | 0.3605000  | 3.1972000  |
| 18 | H                                                                                    | -0.4638000 | -0.3463000 | 2.2440000  |
| 19 | C                                                                                    | 1.5072000  | -0.8631000 | 1.5879000  |
| 20 | C                                                                                    | 0.4744000  | 1.3539000  | 1.3344000  |
| 21 | C                                                                                    | -2.5010000 | -1.6262000 | -0.5616000 |
| 22 | H                                                                                    | -1.5736000 | -2.1534000 | -0.7361000 |
| 23 | C                                                                                    | -2.5419000 | -0.2231000 | -0.5384000 |
| 24 | C                                                                                    | 1.4942000  | -2.2160000 | 1.9243000  |
| 25 | C                                                                                    | 1.4342000  | 1.6366000  | 0.3321000  |
| 26 | H                                                                                    | 1.6466000  | 2.6732000  | 0.1138000  |
| 27 | C                                                                                    | 1.1357000  | -0.2709000 | -3.0802000 |
| 28 | H                                                                                    | 1.9717000  | -0.9525000 | -3.2249000 |
| 29 | H                                                                                    | 0.7380000  | 0.0071000  | -4.0591000 |
| 30 | C                                                                                    | -3.7553000 | 0.4182000  | -0.2384000 |
| 31 | C                                                                                    | -3.6533000 | -2.3568000 | -0.3183000 |
| 32 | H                                                                                    | -3.6107000 | -3.4395000 | -0.3303000 |
| 33 | C                                                                                    | 0.0590000  | -0.8238000 | -2.1668000 |
| 34 | H                                                                                    | -0.8271000 | -1.1906000 | -2.6789000 |
| 35 | H                                                                                    | 0.4451000  | -1.5881000 | -1.4909000 |
| 36 | C                                                                                    | 3.4486000  | -1.2845000 | 0.1836000  |
| 37 | H                                                                                    | 4.1962000  | -0.8957000 | -0.4974000 |
| 38 | C                                                                                    | 2.4430000  | -3.0932000 | 1.4138000  |
| 39 | C                                                                                    | 3.4252000  | -2.6245000 | 0.5454000  |
| 40 | H                                                                                    | 4.1695000  | -3.3018000 | 0.1429000  |
| 41 | H                                                                                    | 0.7303000  | -2.5779000 | 2.6047000  |
| 42 | H                                                                                    | 2.4162000  | -4.1403000 | 1.6924000  |
| 43 | H                                                                                    | -3.7858000 | 1.5011000  | -0.1956000 |
| IM | 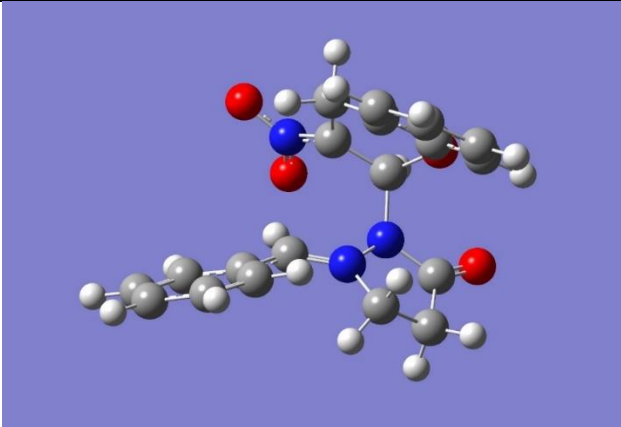 |            |            |            |
|    |                                                                                      | X          | Y          | Z          |
| 1  | O                                                                                    | 2.6440000  | 0.6573000  | 0.3119000  |
| 2  | O                                                                                    | -0.3716000 | 3.1984000  | 1.0919000  |
| 3  | O                                                                                    | 2.5452000  | 1.9564000  | -2.4262000 |
| 4  | O                                                                                    | -0.7873000 | 2.1127000  | 2.9668000  |
| 5  | N                                                                                    | -0.2734000 | 0.4567000  | -1.2147000 |
| 6  | N                                                                                    | 0.8186000  | 1.2884000  | -1.0706000 |

|    |   |            |            |            |
|----|---|------------|------------|------------|
| 7  | N | -0.1868000 | 2.1944000  | 1.8591000  |
| 8  | C | -4.8817000 | -0.2026000 | 0.0582000  |
| 9  | H | -5.7973000 | 0.2992000  | 0.3469000  |
| 10 | C | 2.4442000  | -0.6797000 | 0.5604000  |
| 11 | C | -4.8822000 | -1.5702000 | -0.1989000 |
| 12 | H | -5.8022000 | -2.1365000 | -0.1105000 |
| 13 | C | -1.3420000 | 0.7121000  | -0.5223000 |
| 14 | H | -1.3498000 | 1.6880000  | -0.0383000 |
| 15 | C | 1.5485000  | 1.3009000  | -2.2558000 |
| 16 | C | 0.7818000  | -0.0142000 | 2.2861000  |
| 17 | H | 1.3366000  | 0.2330000  | 3.2046000  |
| 18 | H | -0.1876000 | -0.3929000 | 2.6205000  |
| 19 | C | 1.5283000  | -1.0759000 | 1.5321000  |
| 20 | C | 0.5989000  | 1.2014000  | 1.4389000  |
| 21 | C | -2.5206000 | -1.5052000 | -0.6728000 |
| 22 | H | -1.6063000 | -2.0312000 | -0.9137000 |
| 23 | C | -2.5148000 | -0.1214000 | -0.4342000 |
| 24 | C | 1.3773000  | -2.4386000 | 1.7759000  |
| 25 | C | 1.4836000  | 1.4654000  | 0.2790000  |
| 26 | H | 1.8358000  | 2.4945000  | 0.2634000  |
| 27 | C | 0.8618000  | 0.3688000  | -3.2267000 |
| 28 | H | 1.6015000  | -0.2241000 | -3.7606000 |
| 29 | H | 0.2952000  | 0.9620000  | -3.9489000 |
| 30 | C | -3.7028000 | 0.5171000  | -0.0433000 |
| 31 | C | -3.7010000 | -2.2189000 | -0.5519000 |
| 32 | H | -3.7007000 | -3.2882000 | -0.7264000 |
| 33 | C | -0.0546000 | -0.4659000 | -2.3425000 |
| 34 | H | -1.0113000 | -0.7137000 | -2.7930000 |
| 35 | H | 0.4400000  | -1.3669000 | -1.9770000 |
| 36 | C | 3.2131000  | -1.6005000 | -0.1399000 |
| 37 | H | 3.9194000  | -1.2501000 | -0.8834000 |
| 38 | C | 2.1391000  | -3.3761000 | 1.0861000  |
| 39 | C | 3.0617000  | -2.9550000 | 0.1328000  |
| 40 | H | 3.6596000  | -3.6807000 | -0.4068000 |
| 41 | H | 0.6615000  | -2.7636000 | 2.5239000  |
| 42 | H | 2.0130000  | -4.4327000 | 1.2928000  |
| 43 | H | -3.6904000 | 1.5801000  | 0.1682000  |

TS2

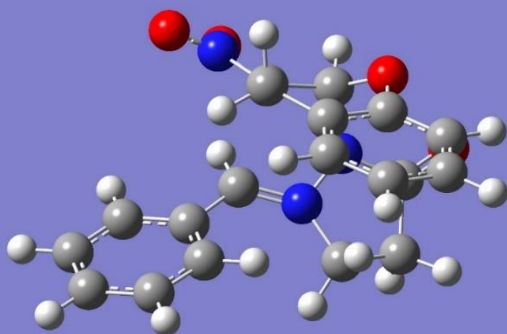

|   |   | X          | Y          | Z          |
|---|---|------------|------------|------------|
| 1 | O | 2.3797000  | -0.7463000 | -0.9270000 |
| 2 | O | -0.7575000 | -3.1864000 | -1.2014000 |
| 3 | O | 3.1208000  | -1.9668000 | 1.7664000  |
| 4 | O | -1.6226000 | -1.8090000 | -2.6649000 |
| 5 | N | 0.0152000  | -0.6142000 | 1.3356000  |
| 6 | N | 1.0410000  | -1.4456000 | 0.9317000  |
| 7 | N | -0.7997000 | -2.0619000 | -1.7613000 |

|    |   |            |            |            |
|----|---|------------|------------|------------|
| 8  | C | -4.6541000 | 0.3084000  | 0.5065000  |
| 9  | H | -5.6353000 | -0.1346000 | 0.3827000  |
| 10 | C | 2.2104000  | 0.6178000  | -0.9160000 |
| 11 | C | -4.5195000 | 1.6875000  | 0.6344000  |
| 12 | H | -5.3981000 | 2.3220000  | 0.6103000  |
| 13 | C | -1.1255000 | -0.8469000 | 0.7112000  |
| 14 | H | -1.3163000 | -1.8975000 | 0.4931000  |
| 15 | C | 2.0782000  | -1.3690000 | 1.8587000  |
| 16 | C | 0.0155000  | 0.2384000  | -2.0156000 |
| 17 | H | 0.2442000  | 0.0614000  | -3.0768000 |
| 18 | H | -0.9744000 | 0.7005000  | -1.9952000 |
| 19 | C | 1.0429000  | 1.1678000  | -1.4389000 |
| 20 | C | 0.0065000  | -1.0668000 | -1.2813000 |
| 21 | C | -2.1278000 | 1.4523000  | 0.8173000  |
| 22 | H | -1.1517000 | 1.9108000  | 0.9078000  |
| 23 | C | -2.2558000 | 0.0602000  | 0.7058000  |
| 24 | C | 0.9100000  | 2.5536000  | -1.4378000 |
| 25 | C | 1.2473000  | -1.5105000 | -0.5666000 |
| 26 | H | 1.4987000  | -2.5417000 | -0.7966000 |
| 27 | C | 1.6309000  | -0.4175000 | 2.9518000  |
| 28 | H | 2.4661000  | 0.2018000  | 3.2725000  |
| 29 | H | 1.2783000  | -1.0038000 | 3.8047000  |
| 30 | C | -3.5293000 | -0.5013000 | 0.5334000  |
| 31 | C | -3.2569000 | 2.2559000  | 0.7832000  |
| 32 | H | -3.1523000 | 3.3313000  | 0.8665000  |
| 33 | C | 0.4957000  | 0.3721000  | 2.3044000  |
| 34 | H | -0.3116000 | 0.6370000  | 2.9826000  |
| 35 | H | 0.8694000  | 1.2642000  | 1.7951000  |
| 36 | C | 3.2387000  | 1.4109000  | -0.4253000 |
| 37 | H | 4.1340000  | 0.9434000  | -0.0328000 |
| 38 | C | 1.9303000  | 3.3661000  | -0.9534000 |
| 39 | C | 3.0965000  | 2.7937000  | -0.4540000 |
| 40 | H | 3.8952000  | 3.4223000  | -0.0771000 |
| 41 | H | 0.0027000  | 2.9968000  | -1.8348000 |
| 42 | H | 1.8149000  | 4.4438000  | -0.9665000 |
| 43 | H | -3.6270000 | -1.5762000 | 0.4316000  |

*anti-exo* cycloaddition

TS1

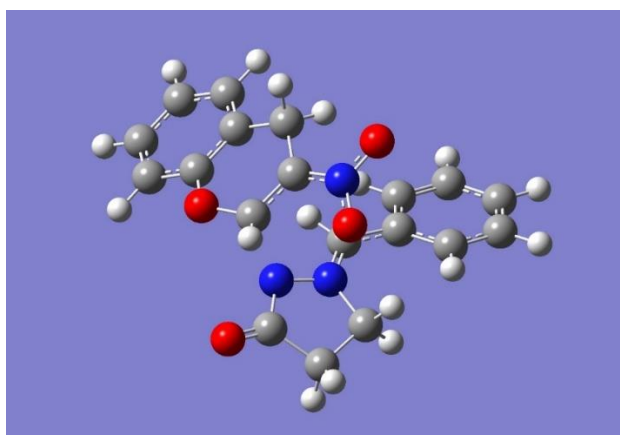

|   |   | X          | Y         | Z          |
|---|---|------------|-----------|------------|
| 1 | O | 2.6671000  | 0.8918000 | 0.1536000  |
| 2 | O | -0.6301000 | 2.0187000 | 2.0666000  |
| 3 | O | 1.3142000  | 3.7494000 | -1.0433000 |
| 4 | O | -0.7774000 | 0.1062000 | 3.1114000  |
| 5 | N | -0.8401000 | 1.1536000 | -0.8054000 |

|    |   |            |            |            |
|----|---|------------|------------|------------|
| 6  | N | 0.4293000  | 1.6540000  | -0.8214000 |
| 7  | N | -0.2385000 | 0.8420000  | 2.2609000  |
| 8  | C | -3.2847000 | -3.0484000 | -0.8591000 |
| 9  | H | -3.2116000 | -4.0929000 | -1.1377000 |
| 10 | C | 2.8796000  | -0.4463000 | -0.1001000 |
| 11 | C | -4.4927000 | -2.5249000 | -0.4092000 |
| 12 | H | -5.3672000 | -3.1611000 | -0.3370000 |
| 13 | C | -1.0104000 | -0.1313000 | -0.7363000 |
| 14 | H | -0.1049000 | -0.7099000 | -0.8688000 |
| 15 | C | 0.3517000  | 3.0110000  | -1.0744000 |
| 16 | C | 1.2231000  | -1.0704000 | 1.6837000  |
| 17 | H | 1.6734000  | -1.2221000 | 2.6743000  |
| 18 | H | 0.3633000  | -1.7455000 | 1.6413000  |
| 19 | C | 2.2171000  | -1.4383000 | 0.6161000  |
| 20 | C | 0.7951000  | 0.3492000  | 1.5145000  |
| 21 | C | -3.4655000 | -0.3592000 | -0.1325000 |
| 22 | H | -3.5563000 | 0.6694000  | 0.1840000  |
| 23 | C | -2.2449000 | -0.8718000 | -0.6011000 |
| 24 | C | 2.5167000  | -2.7663000 | 0.3134000  |
| 25 | C | 1.4791000  | 1.2655000  | 0.6873000  |
| 26 | H | 1.5121000  | 2.3045000  | 0.9896000  |
| 27 | C | -1.0773000 | 3.4002000  | -1.3738000 |
| 28 | H | -1.1846000 | 3.5484000  | -2.4509000 |
| 29 | H | -1.3280000 | 4.3306000  | -0.8677000 |
| 30 | C | -2.1683000 | -2.2332000 | -0.9432000 |
| 31 | C | -4.5746000 | -1.1853000 | -0.0398000 |
| 32 | H | -5.5098000 | -0.7806000 | 0.3288000  |
| 33 | C | -1.8753000 | 2.2136000  | -0.8772000 |
| 34 | H | -2.2702000 | 2.3801000  | 0.1231000  |
| 35 | H | -2.6630000 | 1.8833000  | -1.5502000 |
| 36 | C | 3.8229000  | -0.7477000 | -1.0744000 |
| 37 | H | 4.3155000  | 0.0594000  | -1.6035000 |
| 38 | C | 3.4575000  | -3.0899000 | -0.6556000 |
| 39 | C | 4.1141000  | -2.0763000 | -1.3489000 |
| 40 | H | 4.8490000  | -2.3183000 | -2.1078000 |
| 41 | H | 2.0031000  | -3.5534000 | 0.8560000  |
| 42 | H | 3.6769000  | -4.1292000 | -0.8708000 |
| 43 | H | -1.2234000 | -2.6406000 | -1.2844000 |

IM

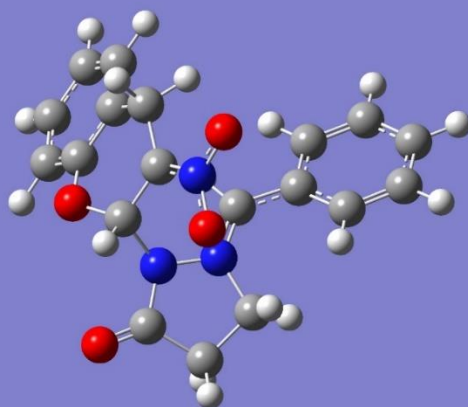

|   |   | X          | Y         | Z          |
|---|---|------------|-----------|------------|
| 1 | O | 2.6727000  | 0.7127000 | 0.1662000  |
| 2 | O | -0.6253000 | 2.0722000 | 1.9868000  |
| 3 | O | 1.6601000  | 3.6517000 | -0.9190000 |
| 4 | O | -0.7706000 | 0.2564000 | 3.2240000  |
| 5 | N | -0.6654000 | 1.1694000 | -0.7453000 |
| 6 | N | 0.6231000  | 1.6353000 | -0.6044000 |
| 7 | N | -0.2390000 | 0.8969000 | 2.2779000  |



|    |   |            |            |            |
|----|---|------------|------------|------------|
| 8  | C | -3.3865000 | -2.8342000 | -0.8140000 |
| 9  | H | -3.3868000 | -3.8896000 | -1.0587000 |
| 10 | C | 2.7228000  | -0.6292000 | -0.1181000 |
| 11 | C | -4.5713000 | -2.1960000 | -0.4597000 |
| 12 | H | -5.4993000 | -2.7552000 | -0.4293000 |
| 13 | C | -0.8986000 | -0.1009000 | -0.6070000 |
| 14 | H | -0.0279000 | -0.7433000 | -0.6315000 |
| 15 | C | 0.6886000  | 2.9515000  | -1.0580000 |
| 16 | C | 1.2277000  | -1.0353000 | 1.8364000  |
| 17 | H | 1.8404000  | -1.0450000 | 2.7512000  |
| 18 | H | 0.3878000  | -1.7061000 | 2.0324000  |
| 19 | C | 2.0453000  | -1.5463000 | 0.6833000  |
| 20 | C | 0.7311000  | 0.3398000  | 1.5400000  |
| 21 | C | -3.3862000 | -0.1165000 | -0.1695000 |
| 22 | H | -3.4018000 | 0.9255000  | 0.1178000  |
| 23 | C | -2.1888000 | -0.7472000 | -0.5429000 |
| 24 | C | 2.1688000  | -2.9009000 | 0.3803000  |
| 25 | C | 1.4457000  | 1.2340000  | 0.6094000  |
| 26 | H | 1.6817000  | 2.1950000  | 1.0677000  |
| 27 | C | -0.6291000 | 3.2880000  | -1.7023000 |
| 28 | H | -0.5324000 | 3.1658000  | -2.7843000 |
| 29 | H | -0.9041000 | 4.3177000  | -1.4855000 |
| 30 | C | -2.2008000 | -2.1193000 | -0.8432000 |
| 31 | C | -4.5650000 | -0.8433000 | -0.1295000 |
| 32 | H | -5.4845000 | -0.3527000 | 0.1670000  |
| 33 | C | -1.5826000 | 2.2712000  | -1.0996000 |
| 34 | H | -2.0477000 | 2.6487000  | -0.1910000 |
| 35 | H | -2.3316000 | 1.8943000  | -1.7909000 |
| 36 | C | 3.5185000  | -1.0381000 | -1.1818000 |
| 37 | H | 4.0327000  | -0.2935000 | -1.7781000 |
| 38 | C | 2.9634000  | -3.3285000 | -0.6771000 |
| 39 | C | 3.6417000  | -2.3943000 | -1.4555000 |
| 40 | H | 4.2622000  | -2.7195000 | -2.2828000 |
| 41 | H | 1.6386000  | -3.6253000 | 0.9900000  |
| 42 | H | 3.0516000  | -4.3867000 | -0.8947000 |
| 43 | H | -1.2723000 | -2.6134000 | -1.1064000 |

TS2

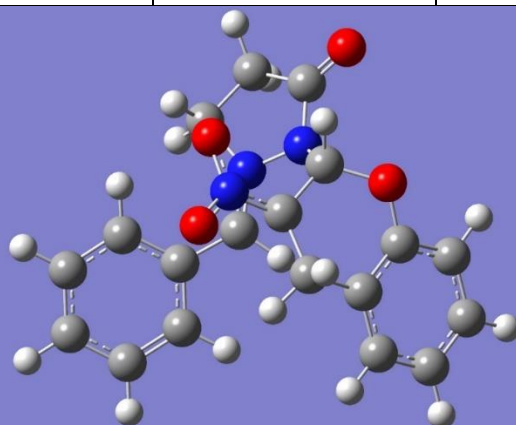

|   |   | X          | Y          | Z          |
|---|---|------------|------------|------------|
| 1 | O | 2.5752000  | 0.7328000  | 0.5793000  |
| 2 | O | -1.0642000 | 1.7219000  | 1.9342000  |
| 3 | O | 1.6860000  | 3.7662000  | -0.4251000 |
| 4 | O | -1.2865000 | -0.2463000 | 2.8679000  |
| 5 | N | -0.5711000 | 1.2472000  | -0.8245000 |
| 6 | N | 0.6831000  | 1.7043000  | -0.4775000 |
| 7 | N | -0.6822000 | 0.5354000  | 2.1046000  |
| 8 | C | -3.2702000 | -2.7631000 | -1.0357000 |
| 9 | H | -3.2873000 | -3.8004000 | -1.3489000 |

|    |   |            |            |            |
|----|---|------------|------------|------------|
| 10 | C | 2.7562000  | -0.5427000 | 0.1053000  |
| 11 | C | -4.4416000 | -2.1385000 | -0.6170000 |
| 12 | H | -5.3747000 | -2.6900000 | -0.6042000 |
| 13 | C | -0.7559000 | -0.0500000 | -0.6815000 |
| 14 | H | 0.1084000  | -0.6708000 | -0.8846000 |
| 15 | C | 0.7722000  | 3.0617000  | -0.7760000 |
| 16 | C | 0.9312000  | -1.2720000 | 1.6297000  |
| 17 | H | 1.3651000  | -1.3347000 | 2.6386000  |
| 18 | H | 0.1295000  | -2.0128000 | 1.5958000  |
| 19 | C | 1.9835000  | -1.5887000 | 0.6054000  |
| 20 | C | 0.3832000  | 0.0951000  | 1.3792000  |
| 21 | C | -3.2262000 | -0.0946000 | -0.2200000 |
| 22 | H | -3.2192000 | 0.9284000  | 0.1294000  |
| 23 | C | -2.0446000 | -0.7104000 | -0.6577000 |
| 24 | C | 2.2335000  | -2.8763000 | 0.1368000  |
| 25 | C | 1.2546000  | 1.1566000  | 0.8089000  |
| 26 | H | 1.3329000  | 2.0171000  | 1.4731000  |
| 27 | C | -0.4595000 | 3.4326000  | -1.5661000 |
| 28 | H | -0.2202000 | 3.3830000  | -2.6319000 |
| 29 | H | -0.7766000 | 4.4438000  | -1.3213000 |
| 30 | C | -2.0776000 | -2.0578000 | -1.0481000 |
| 31 | C | -4.4143000 | -0.8095000 | -0.2038000 |
| 32 | H | -5.3231000 | -0.3288000 | 0.1387000  |
| 33 | C | -1.4670000 | 2.3648000  | -1.1607000 |
| 34 | H | -2.0355000 | 2.6764000  | -0.2858000 |
| 35 | H | -2.1358000 | 2.0535000  | -1.9595000 |
| 36 | C | 3.7670000  | -0.7613000 | -0.8220000 |
| 37 | H | 4.3493000  | 0.0779000  | -1.1837000 |
| 38 | C | 3.2444000  | -3.1149000 | -0.7877000 |
| 39 | C | 4.0130000  | -2.0559000 | -1.2628000 |
| 40 | H | 4.8017000  | -2.2344000 | -1.9849000 |
| 41 | H | 1.6315000  | -3.6981000 | 0.5104000  |
| 42 | H | 3.4302000  | -4.1236000 | -1.1379000 |
| 43 | H | -1.1610000 | -2.5408000 | -1.3675000 |

*syn-endo* cycloaddition

TS1

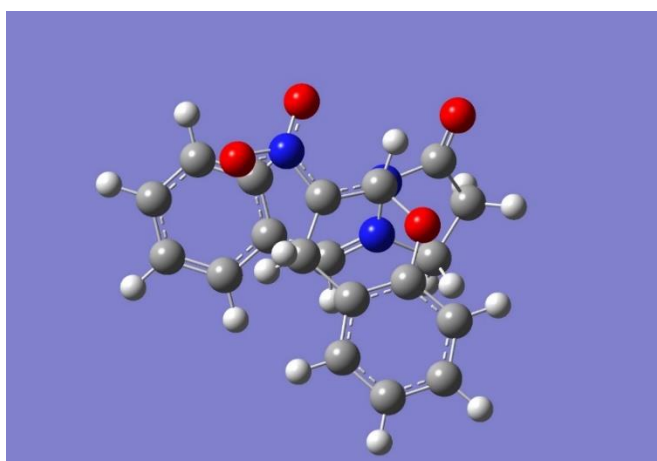

|   |   | X          | Y          | Z          |
|---|---|------------|------------|------------|
| 1 | O | 1.9753000  | 0.5561000  | 0.9987000  |
| 2 | O | -1.5641000 | 0.8267000  | 2.7938000  |
| 3 | O | 0.7715000  | 3.6844000  | 0.9801000  |
| 4 | O | -1.8560000 | -1.3359000 | 2.6891000  |
| 5 | N | 0.1813000  | 1.2163000  | -1.2595000 |
| 6 | N | 0.0357000  | 1.7481000  | 0.0022000  |
| 7 | N | -1.2062000 | -0.3079000 | 2.3861000  |

|    |   |            |            |            |
|----|---|------------|------------|------------|
| 8  | C | -3.7531000 | -1.5959000 | -1.9229000 |
| 9  | H | -4.1777000 | -2.3765000 | -2.5427000 |
| 10 | C | 2.3867000  | -0.6258000 | 0.4205000  |
| 11 | C | -4.4922000 | -1.0469000 | -0.8803000 |
| 12 | H | -5.4974000 | -1.4020000 | -0.6837000 |
| 13 | C | -0.6250000 | 0.3655000  | -1.8111000 |
| 14 | H | -0.2822000 | 0.0250000  | -2.7818000 |
| 15 | C | 0.7064000  | 2.9721000  | 0.0043000  |
| 16 | C | 0.2518000  | -1.7904000 | 1.0820000  |
| 17 | H | 0.2632000  | -2.5131000 | 1.9057000  |
| 18 | H | -0.5032000 | -2.1647000 | 0.3779000  |
| 19 | C | 1.6011000  | -1.7733000 | 0.4207000  |
| 20 | C | -0.1059000 | -0.4408000 | 1.6002000  |
| 21 | C | -2.6578000 | 0.4153000  | -0.3159000 |
| 22 | H | -2.2329000 | 1.1823000  | 0.3167000  |
| 23 | C | -1.9098000 | -0.1219000 | -1.3767000 |
| 24 | C | 2.1238000  | -2.9145000 | -0.1890000 |
| 25 | C | 0.6554000  | 0.7296000  | 1.3388000  |
| 26 | H | 0.5574000  | 1.5278000  | 2.0647000  |
| 27 | C | 1.3268000  | 3.2251000  | -1.3523000 |
| 28 | H | 2.3275000  | 3.6366000  | -1.2364000 |
| 29 | H | 0.7094000  | 3.9431000  | -1.8981000 |
| 30 | C | -2.4745000 | -1.1285000 | -2.1788000 |
| 31 | C | -3.9441000 | -0.0410000 | -0.0860000 |
| 32 | H | -4.5233000 | 0.3834000  | 0.7253000  |
| 33 | C | 1.3013000  | 1.8538000  | -1.9969000 |
| 34 | H | 1.0786000  | 1.8464000  | -3.0599000 |
| 35 | H | 2.2120000  | 1.2878000  | -1.7991000 |
| 36 | C | 3.6600000  | -0.6088000 | -0.1403000 |
| 37 | H | 4.2419000  | 0.3047000  | -0.1044000 |
| 38 | C | 3.3877000  | -2.9169000 | -0.7632000 |
| 39 | C | 4.1607000  | -1.7588000 | -0.7320000 |
| 40 | H | 5.1523000  | -1.7484000 | -1.1697000 |
| 41 | H | 1.5217000  | -3.8174000 | -0.2011000 |
| 42 | H | 3.7706000  | -3.8179000 | -1.2280000 |
| 43 | H | -1.9025000 | -1.5311000 | -3.0076000 |

IM

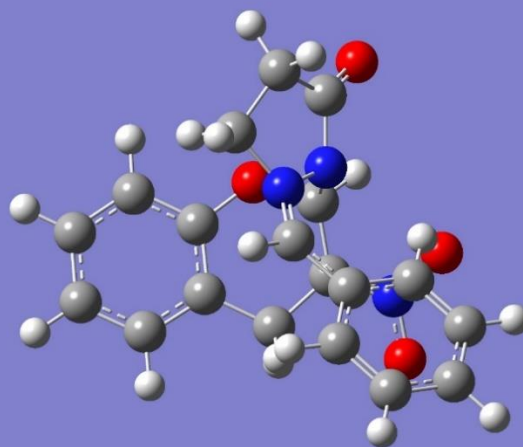

|   |   | X          | Y          | Z          |
|---|---|------------|------------|------------|
| 1 | O | 1.9801000  | 0.5201000  | 1.1275000  |
| 2 | O | -1.5794000 | 0.5770000  | 2.8161000  |
| 3 | O | 0.8106000  | 3.5851000  | 1.1060000  |
| 4 | O | -1.7815000 | -1.6017000 | 2.5883000  |
| 5 | N | 0.2085000  | 1.1346000  | -1.1852000 |
| 6 | N | 0.1394000  | 1.6184000  | 0.1210000  |
| 7 | N | -1.1878000 | -0.5208000 | 2.3013000  |

|    |   |            |            |            |
|----|---|------------|------------|------------|
| 8  | C | -3.8967000 | -1.4024000 | -1.9305000 |
| 9  | H | -4.3773000 | -2.1102000 | -2.5949000 |
| 10 | C | 2.4362000  | -0.5761000 | 0.4408000  |
| 11 | C | -4.5722000 | -0.9113000 | -0.8178000 |
| 12 | H | -5.5846000 | -1.2405000 | -0.6127000 |
| 13 | C | -0.6854000 | 0.3974000  | -1.7675000 |
| 14 | H | -0.4018000 | 0.1312000  | -2.7805000 |
| 15 | C | 0.7109000  | 2.9113000  | 0.1158000  |
| 16 | C | 0.2921000  | -1.8326000 | 0.8653000  |
| 17 | H | 0.2966000  | -2.5960000 | 1.6526000  |
| 18 | H | -0.4053000 | -2.2121000 | 0.1048000  |
| 19 | C | 1.6692000  | -1.7270000 | 0.2722000  |
| 20 | C | -0.1644000 | -0.5384000 | 1.4422000  |
| 21 | C | -2.6602000 | 0.4237000  | -0.2019000 |
| 22 | H | -2.1917000 | 1.1200000  | 0.4793000  |
| 23 | C | -1.9739000 | -0.0591000 | -1.3292000 |
| 24 | C | 2.2355000  | -2.7884000 | -0.4356000 |
| 25 | C | 0.5804000  | 0.7148000  | 1.2568000  |
| 26 | H | 0.4337000  | 1.3666000  | 2.1146000  |
| 27 | C | 1.1605000  | 3.2312000  | -1.2879000 |
| 28 | H | 2.1014000  | 3.7766000  | -1.2648000 |
| 29 | H | 0.4005000  | 3.8465000  | -1.7772000 |
| 30 | C | -2.6094000 | -0.9682000 | -2.1947000 |
| 31 | C | -3.9569000 | 0.0043000  | 0.0351000  |
| 32 | H | -4.4913000 | 0.3846000  | 0.8970000  |
| 33 | C | 1.2644000  | 1.8571000  | -1.9282000 |
| 34 | H | 1.0442000  | 1.8276000  | -2.9909000 |
| 35 | H | 2.2240000  | 1.3821000  | -1.7217000 |
| 36 | C | 3.7381000  | -0.4939000 | -0.0503000 |
| 37 | H | 4.3058000  | 0.4148000  | 0.1135000  |
| 38 | C | 3.5280000  | -2.7212000 | -0.9376000 |
| 39 | C | 4.2841000  | -1.5686000 | -0.7358000 |
| 40 | H | 5.2971000  | -1.5030000 | -1.1164000 |
| 41 | H | 1.6450000  | -3.6878000 | -0.5807000 |
| 42 | H | 3.9454000  | -3.5626000 | -1.4785000 |
| 43 | H | -2.0821000 | -1.3231000 | -3.0733000 |

TS2

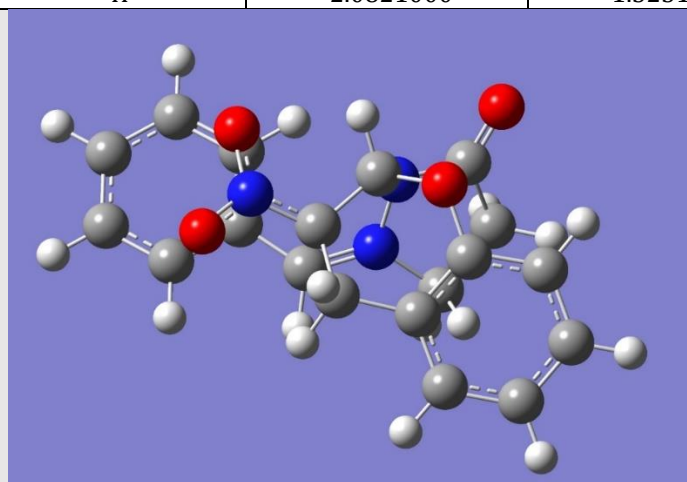

|   |   | X          | Y          | Z          |
|---|---|------------|------------|------------|
| 1 | O | 1.7369000  | 0.0026000  | 1.6477000  |
| 2 | O | -2.0332000 | -0.9192000 | 1.9366000  |
| 3 | O | 1.3272000  | 2.9705000  | 1.5597000  |
| 4 | O | -1.6528000 | -2.7981000 | 0.8986000  |
| 5 | N | -0.0027000 | 1.0390000  | -0.9025000 |
| 6 | N | 0.1431000  | 1.3456000  | 0.4330000  |
| 7 | N | -1.3188000 | -1.6327000 | 1.1999000  |

|    |   |            |            |            |
|----|---|------------|------------|------------|
| 8  | C | -4.5532000 | -0.7178000 | -1.1877000 |
| 9  | H | -5.1949000 | -1.4592000 | -1.6496000 |
| 10 | C | 2.5642000  | -0.4614000 | 0.6538000  |
| 11 | C | -5.0978000 | 0.2742000  | -0.3780000 |
| 12 | H | -6.1675000 | 0.3065000  | -0.2040000 |
| 13 | C | -0.9492000 | 0.1847000  | -1.2450000 |
| 14 | H | -0.7466000 | -0.3310000 | -2.1803000 |
| 15 | C | 1.0052000  | 2.4524000  | 0.5228000  |
| 16 | C | 0.7911000  | -2.1046000 | 0.0527000  |
| 17 | H | 0.9085000  | -2.9516000 | 0.7442000  |
| 18 | H | 0.4007000  | -2.5326000 | -0.8726000 |
| 19 | C | 2.1378000  | -1.4882000 | -0.1849000 |
| 20 | C | -0.1669000 | -1.1175000 | 0.6594000  |
| 21 | C | -2.8986000 | 1.1903000  | -0.0026000 |
| 22 | H | -2.2626000 | 1.9324000  | 0.4611000  |
| 23 | C | -2.3438000 | 0.2096000  | -0.8368000 |
| 24 | C | 3.0077000  | -1.9275000 | -1.1798000 |
| 25 | C | 0.3660000  | 0.1043000  | 1.3205000  |
| 26 | H | -0.1490000 | 0.3147000  | 2.2513000  |
| 27 | C | 1.4290000  | 2.8238000  | -0.8855000 |
| 28 | H | 2.4824000  | 3.0966000  | -0.8957000 |
| 29 | H | 0.8398000  | 3.6841000  | -1.2149000 |
| 30 | C | -3.1871000 | -0.7462000 | -1.4224000 |
| 31 | C | -4.2681000 | 1.2276000  | 0.2062000  |
| 32 | H | -4.6913000 | 2.0020000  | 0.8356000  |
| 33 | C | 1.1023000  | 1.5769000  | -1.7027000 |
| 34 | H | 0.7479000  | 1.7849000  | -2.7085000 |
| 35 | H | 1.9399000  | 0.8752000  | -1.7345000 |
| 36 | C | 3.8305000  | 0.0983000  | 0.5401000  |
| 37 | H | 4.1263000  | 0.8909000  | 1.2172000  |
| 38 | C | 4.2788000  | -1.3786000 | -1.3112000 |
| 39 | C | 4.6924000  | -0.3716000 | -0.4436000 |
| 40 | H | 5.6830000  | 0.0583000  | -0.5381000 |
| 41 | H | 2.6848000  | -2.7185000 | -1.8491000 |
| 42 | H | 4.9450000  | -1.7365000 | -2.0877000 |
| 43 | H | -2.7630000 | -1.4962000 | -2.0808000 |

*syn-exo* cycloaddition

TS1

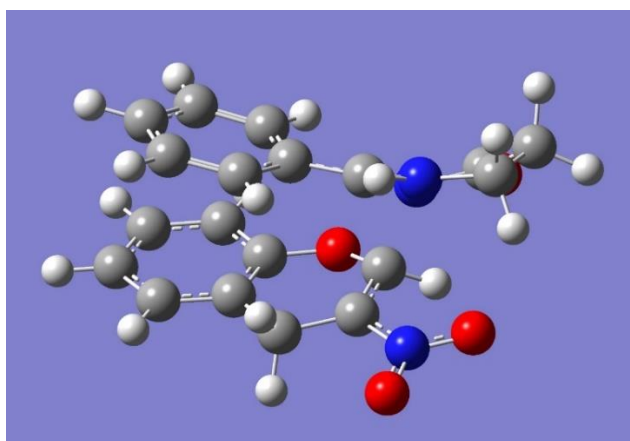

|   |   | X          | Y          | Z          |
|---|---|------------|------------|------------|
| 1 | O | -0.0208000 | -1.8797000 | -0.8420000 |
| 2 | O | 2.9153000  | -0.9456000 | 1.6530000  |
| 3 | O | 2.8901000  | -1.3895000 | -2.3287000 |
| 4 | O | 1.5367000  | -0.6352000 | 3.3239000  |
| 5 | N | 1.9144000  | 1.1428000  | -0.3179000 |

|    |   |            |            |            |
|----|---|------------|------------|------------|
| 6  | N | 1.6340000  | -0.0004000 | -1.0114000 |
| 7  | N | 1.7424000  | -0.8586000 | 2.1093000  |
| 8  | C | -2.4932000 | 2.9887000  | 0.6624000  |
| 9  | H | -3.0650000 | 3.5749000  | 1.3728000  |
| 10 | C | -1.3347000 | -1.6800000 | -0.4921000 |
| 11 | C | -3.1032000 | 2.4828000  | -0.4822000 |
| 12 | H | -4.1547000 | 2.6746000  | -0.6654000 |
| 13 | C | 1.0275000  | 1.9246000  | 0.2124000  |
| 14 | H | 1.4575000  | 2.6916000  | 0.8477000  |
| 15 | C | 2.7948000  | -0.3638000 | -1.6948000 |
| 16 | C | -0.6968000 | -0.8895000 | 1.8151000  |
| 17 | H | -0.8163000 | -1.5696000 | 2.6676000  |
| 18 | H | -0.8913000 | 0.1118000  | 2.2179000  |
| 19 | C | -1.7175000 | -1.2193000 | 0.7633000  |
| 20 | C | 0.6845000  | -1.0022000 | 1.2708000  |
| 21 | C | -1.0234000 | 1.4712000  | -1.1652000 |
| 22 | H | -0.4558000 | 0.8900000  | -1.8795000 |
| 23 | C | -0.3959000 | 1.9914000  | -0.0222000 |
| 24 | C | -3.0832000 | -1.0848000 | 1.0155000  |
| 25 | C | 0.9842000  | -1.3705000 | -0.0735000 |
| 26 | H | 1.8681000  | -1.9836000 | -0.2045000 |
| 27 | C | 3.8660000  | 0.6799000  | -1.4804000 |
| 28 | H | 3.9223000  | 1.3230000  | -2.3626000 |
| 29 | H | 4.8327000  | 0.2008000  | -1.3383000 |
| 30 | C | -1.1441000 | 2.7630000  | 0.8817000  |
| 31 | C | -2.3634000 | 1.7381000  | -1.3975000 |
| 32 | H | -2.8367000 | 1.3559000  | -2.2944000 |
| 33 | C | 3.3727000  | 1.4306000  | -0.2622000 |
| 34 | H | 3.7651000  | 1.0187000  | 0.6649000  |
| 35 | H | 3.5138000  | 2.5068000  | -0.2992000 |
| 36 | C | -2.2713000 | -2.0146000 | -1.4654000 |
| 37 | H | -1.9274000 | -2.3746000 | -2.4286000 |
| 38 | C | -4.0335000 | -1.4080000 | 0.0568000  |
| 39 | C | -3.6229000 | -1.8779000 | -1.1892000 |
| 40 | H | -4.3544000 | -2.1355000 | -1.9473000 |
| 41 | H | -3.3983000 | -0.7216000 | 1.9892000  |
| 42 | H | -5.0889000 | -1.2958000 | 0.2790000  |
| 43 | H | -0.6551000 | 3.1882000  | 1.7516000  |

IM

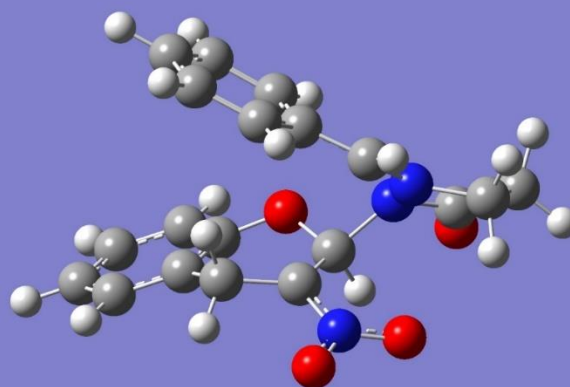

|   |   | X          | Y          | Z          |
|---|---|------------|------------|------------|
| 1 | O | -0.5947000 | -1.0601000 | -1.0459000 |
| 2 | O | 2.1120000  | -1.4564000 | 1.8847000  |
| 3 | O | 2.2971000  | -2.4822000 | -1.8456000 |
| 4 | O | 0.7789000  | -0.5739000 | 3.3950000  |
| 5 | N | 2.3321000  | 0.5025000  | -0.2175000 |
| 6 | N | 1.6570000  | -0.5469000 | -0.7985000 |

|    |   |            |            |            |
|----|---|------------|------------|------------|
| 7  | N | 1.0155000  | -0.8863000 | 2.1951000  |
| 8  | C | -1.0506000 | 3.9741000  | 0.3173000  |
| 9  | H | -1.3819000 | 4.7838000  | 0.9566000  |
| 10 | C | -1.8709000 | -1.2387000 | -0.5858000 |
| 11 | C | -1.7813000 | 3.6303000  | -0.8156000 |
| 12 | H | -2.6878000 | 4.1722000  | -1.0602000 |
| 13 | C | 1.8157000  | 1.6331000  | 0.1411000  |
| 14 | H | 2.5046000  | 2.2426000  | 0.7173000  |
| 15 | C | 2.5972000  | -1.4190000 | -1.3686000 |
| 16 | C | -1.2237000 | -0.0979000 | 1.5331000  |
| 17 | H | -1.2977000 | 0.9908000  | 1.3953000  |
| 18 | H | -1.4281000 | -0.2852000 | 2.5884000  |
| 19 | C | -2.2529000 | -0.7731000 | 0.6709000  |
| 20 | C | 0.1401000  | -0.6136000 | 1.2183000  |
| 21 | C | -0.1943000 | 1.8914000  | -1.3374000 |
| 22 | H | 0.1381000  | 1.0949000  | -1.9876000 |
| 23 | C | 0.5433000  | 2.2283000  | -0.1934000 |
| 24 | C | -3.5801000 | -0.9386000 | 1.0601000  |
| 25 | C | 0.4662000  | -1.1678000 | -0.1102000 |
| 26 | H | 0.7630000  | -2.2197000 | -0.0408000 |
| 27 | C | 3.9607000  | -0.7960000 | -1.2422000 |
| 28 | H | 4.2117000  | -0.2970000 | -2.1820000 |
| 29 | H | 4.7040000  | -1.5629000 | -1.0369000 |
| 30 | C | 0.1162000  | 3.2900000  | 0.6186000  |
| 31 | C | -1.3441000 | 2.5993000  | -1.6448000 |
| 32 | H | -1.9038000 | 2.3478000  | -2.5380000 |
| 33 | C | 3.7783000  | 0.1925000  | -0.1067000 |
| 34 | H | 3.9475000  | -0.2677000 | 0.8647000  |
| 35 | H | 4.3399000  | 1.1155000  | -0.2129000 |
| 36 | C | -2.7855000 | -1.8379000 | -1.4461000 |
| 37 | H | -2.4522000 | -2.1845000 | -2.4174000 |
| 38 | C | -4.5082000 | -1.5329000 | 0.2119000  |
| 39 | C | -4.1083000 | -1.9773000 | -1.0453000 |
| 40 | H | -4.8238000 | -2.4425000 | -1.7140000 |
| 41 | H | -3.8868000 | -0.5868000 | 2.0400000  |
| 42 | H | -5.5373000 | -1.6507000 | 0.5314000  |
| 43 | H | 0.7050000  | 3.5678000  | 1.4857000  |

TS2

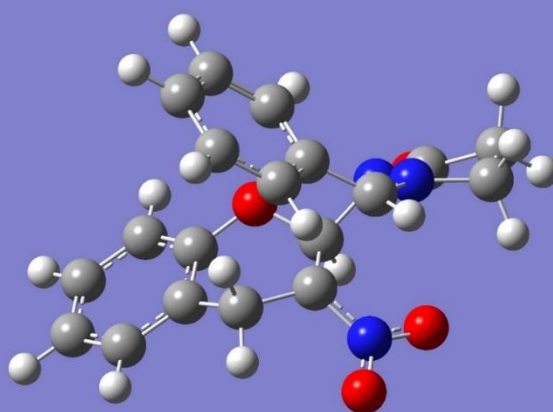

|   |   | X          | Y          | Z          |
|---|---|------------|------------|------------|
| 1 | O | -0.6938000 | -0.7911000 | -1.1550000 |
| 2 | O | 1.8278000  | -1.7322000 | 1.8077000  |
| 3 | O | 2.1236000  | -2.5363000 | -1.9779000 |
| 4 | O | 0.5241000  | -0.8688000 | 3.3260000  |
| 5 | N | 2.3236000  | 0.2979000  | -0.1052000 |
| 6 | N | 1.5995000  | -0.6056000 | -0.8537000 |
| 7 | N | 0.8203000  | -1.0586000 | 2.1312000  |

|    |   |            |            |            |
|----|---|------------|------------|------------|
| 8  | C | -0.7547000 | 4.0531000  | 0.4825000  |
| 9  | H | -1.1432000 | 4.7902000  | 1.1756000  |
| 10 | C | -1.9644000 | -1.0463000 | -0.7086000 |
| 11 | C | -1.1576000 | 4.0615000  | -0.8486000 |
| 12 | H | -1.8647000 | 4.8050000  | -1.1983000 |
| 13 | C | 1.6904000  | 1.2446000  | 0.5576000  |
| 14 | H | 2.2494000  | 1.6116000  | 1.4147000  |
| 15 | C | 2.4842000  | -1.5386000 | -1.4076000 |
| 16 | C | -1.2901000 | 0.0200000  | 1.4284000  |
| 17 | H | -1.4908000 | -0.1355000 | 2.4880000  |
| 18 | H | -1.3540000 | 1.1023000  | 1.2528000  |
| 19 | C | -2.3269000 | -0.6653000 | 0.5815000  |
| 20 | C | 0.0817000  | -0.4927000 | 1.1167000  |
| 21 | C | 0.2585000  | 2.1600000  | -1.2994000 |
| 22 | H | 0.6539000  | 1.4359000  | -1.9992000 |
| 23 | C | 0.6678000  | 2.1439000  | 0.0406000  |
| 24 | C | -3.6328000 | -0.9025000 | 1.0002000  |
| 25 | C | 0.3368000  | -1.0889000 | -0.2261000 |
| 26 | H | 0.4556000  | -2.1756000 | -0.1603000 |
| 27 | C | 3.8891000  | -1.0689000 | -1.1274000 |
| 28 | H | 4.2683000  | -0.5484000 | -2.0109000 |
| 29 | H | 4.5299000  | -1.9238000 | -0.9229000 |
| 30 | C | 0.1570000  | 3.1049000  | 0.9240000  |
| 31 | C | -0.6426000 | 3.1184000  | -1.7356000 |
| 32 | H | -0.9434000 | 3.1335000  | -2.7769000 |
| 33 | C | 3.7261000  | -0.1274000 | 0.0576000  |
| 34 | H | 3.8593000  | -0.6368000 | 1.0098000  |
| 35 | H | 4.3611000  | 0.7531000  | 0.0042000  |
| 36 | C | -2.8759000 | -1.6282000 | -1.5802000 |
| 37 | H | -2.5584000 | -1.9070000 | -2.5782000 |
| 38 | C | -4.5599000 | -1.4842000 | 0.1407000  |
| 39 | C | -4.1815000 | -1.8390000 | -1.1509000 |
| 40 | H | -4.9000000 | -2.2912000 | -1.8251000 |
| 41 | H | -3.9258000 | -0.6172000 | 2.0055000  |
| 42 | H | -5.5747000 | -1.6600000 | 0.4786000  |
| 43 | H | 0.4894000  | 3.1073000  | 1.9564000  |

*cis*-product

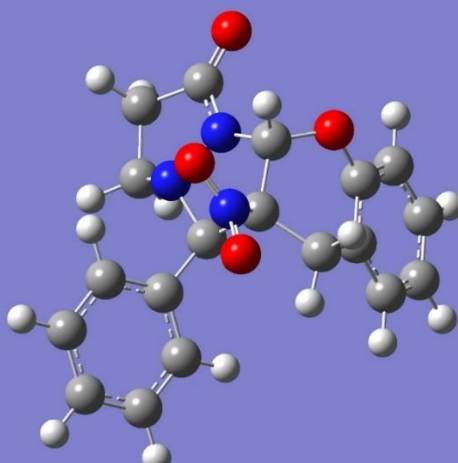

|   |   | X          | Y          | Z          |
|---|---|------------|------------|------------|
| 1 | O | 2.3759000  | 0.3188000  | 1.1959000  |
| 2 | O | -1.3039000 | 1.2594000  | 2.4214000  |
| 3 | O | 2.4956000  | 3.3102000  | -0.0468000 |
| 4 | O | -1.7581000 | -0.8387000 | 2.5216000  |
| 5 | N | -0.4432000 | 1.5058000  | -0.5314000 |
| 6 | N | 0.8596000  | 1.6941000  | 0.0231000  |
| 7 | N | -1.1192000 | 0.1024000  | 2.1030000  |



|    |   |            |            |            |
|----|---|------------|------------|------------|
| 8  | C | -3.7265000 | -1.9643000 | -1.2859000 |
| 9  | H | -3.9403000 | -2.9463000 | -1.6927000 |
| 10 | C | 2.6056000  | -0.7618000 | 0.3798000  |
| 11 | C | -4.7669000 | -1.0971000 | -0.9690000 |
| 12 | H | -5.7958000 | -1.4016000 | -1.1244000 |
| 13 | C | -0.6792000 | 0.0840000  | -0.3604000 |
| 14 | H | -0.0466000 | -0.4988000 | -1.0468000 |
| 15 | C | 1.4792000  | 2.7950000  | -0.4746000 |
| 16 | C | 0.4482000  | -1.6127000 | 1.2127000  |
| 17 | H | 0.7013000  | -1.7801000 | 2.2648000  |
| 18 | H | -0.3305000 | -2.3243000 | 0.9415000  |
| 19 | C | 1.6690000  | -1.7908000 | 0.3607000  |
| 20 | C | -0.0617000 | -0.1873000 | 1.0547000  |
| 21 | C | -3.1634000 | 0.5604000  | -0.2618000 |
| 22 | H | -2.9445000 | 1.5486000  | 0.1245000  |
| 23 | C | -2.1159000 | -0.3085000 | -0.5713000 |
| 24 | C | 1.9252000  | -2.9123000 | -0.4207000 |
| 25 | C | 1.0796000  | 0.8674000  | 1.1799000  |
| 26 | H | 1.0043000  | 1.4338000  | 2.1068000  |
| 27 | C | 0.6254000  | 3.2323000  | -1.6525000 |
| 28 | H | 1.2423000  | 3.4952000  | -2.5101000 |
| 29 | H | 0.0614000  | 4.1188000  | -1.3454000 |
| 30 | C | -2.4081000 | -1.5690000 | -1.0939000 |
| 31 | C | -4.4817000 | 0.1663000  | -0.4619000 |
| 32 | H | -5.2881000 | 0.8505000  | -0.2231000 |
| 33 | C | -0.2882000 | 2.0337000  | -1.8912000 |
| 34 | H | -1.2593000 | 2.2913000  | -2.3094000 |
| 35 | H | 0.2082000  | 1.2948000  | -2.5356000 |
| 36 | C | 3.7885000  | -0.8354000 | -0.3394000 |
| 37 | H | 4.4968000  | -0.0166000 | -0.2955000 |
| 38 | C | 3.1096000  | -3.0082000 | -1.1448000 |
| 39 | C | 4.0389000  | -1.9729000 | -1.0998000 |
| 40 | H | 4.9613000  | -2.0451000 | -1.6645000 |
| 41 | H | 1.1981000  | -3.7170000 | -0.4500000 |
| 42 | H | 3.3065000  | -3.8893000 | -1.7443000 |
| 43 | H | -1.5974000 | -2.2396000 | -1.3580000 |

*trans*-  
product

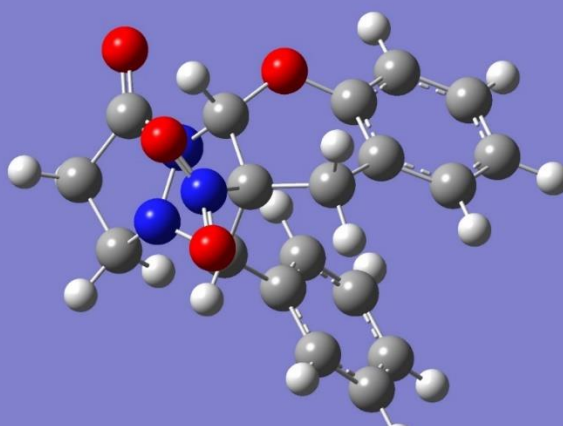

|   |   | X          | Y          | Z          |
|---|---|------------|------------|------------|
| 1 | O | -0.4225000 | 2.0551000  | -0.7345000 |
| 2 | O | -2.8130000 | 1.3583000  | 2.1795000  |
| 3 | O | -2.8228000 | 0.9163000  | -2.7274000 |
| 4 | O | -1.6037000 | 0.0302000  | 3.3499000  |
| 5 | N | -1.8850000 | -1.0682000 | -0.0429000 |
| 6 | N | -1.7300000 | 0.0864000  | -0.8812000 |
| 7 | N | -1.8472000 | 0.6442000  | 2.3335000  |
| 8 | C | 2.6018000  | -2.7834000 | 0.9427000  |

|    |   |            |            |            |
|----|---|------------|------------|------------|
| 9  | H | 3.1914000  | -3.3213000 | 1.6766000  |
| 10 | C | 0.9259000  | 1.8710000  | -0.5755000 |
| 11 | C | 3.0671000  | -2.6369000 | -0.3589000 |
| 12 | H | 4.0242000  | -3.0568000 | -0.6473000 |
| 13 | C | -0.7432000 | -1.0129000 | 0.8603000  |
| 14 | H | -0.9972000 | -1.5724000 | 1.7595000  |
| 15 | C | -2.5363000 | 0.0041000  | -1.9762000 |
| 16 | C | 0.4782000  | 1.1447000  | 1.7539000  |
| 17 | H | 0.2116000  | 2.0823000  | 2.2552000  |
| 18 | H | 0.9280000  | 0.4892000  | 2.4996000  |
| 19 | C | 1.4387000  | 1.4350000  | 0.6410000  |
| 20 | C | -0.7978000 | 0.5108000  | 1.2091000  |
| 21 | C | 1.0688000  | -1.4071000 | -0.9261000 |
| 22 | H | 0.4906000  | -0.8684000 | -1.6652000 |
| 23 | C | 0.5931000  | -1.5457000 | 0.3810000  |
| 24 | C | 2.8184000  | 1.3157000  | 0.7792000  |
| 25 | C | -1.3320000 | 1.2137000  | -0.0690000 |
| 26 | H | -2.1850000 | 1.8488000  | 0.1624000  |
| 27 | C | -2.9982000 | -1.4415000 | -2.0359000 |
| 28 | H | -2.8962000 | -1.8496000 | -3.0402000 |
| 29 | H | -4.0591000 | -1.4501000 | -1.7669000 |
| 30 | C | 1.3696000  | -2.2496000 | 1.3036000  |
| 31 | C | 2.2934000  | -1.9534000 | -1.2917000 |
| 32 | H | 2.6457000  | -1.8396000 | -2.3108000 |
| 33 | C | -2.1416000 | -2.1536000 | -0.9885000 |
| 34 | H | -2.6565000 | -2.9684000 | -0.4821000 |
| 35 | H | -1.2195000 | -2.5336000 | -1.4407000 |
| 36 | C | 1.7574000  | 2.2029000  | -1.6370000 |
| 37 | H | 1.3225000  | 2.5427000  | -2.5694000 |
| 38 | C | 3.6665000  | 1.6449000  | -0.2715000 |
| 39 | C | 3.1327000  | 2.0911000  | -1.4778000 |
| 40 | H | 3.7882000  | 2.3480000  | -2.3021000 |
| 41 | H | 3.2249000  | 0.9661000  | 1.7222000  |
| 42 | H | 4.7394000  | 1.5521000  | -0.1505000 |
| 43 | H | 1.0027000  | -2.3831000 | 2.3162000  |

## 2-Nitrobenzofuran + azomethine imine 2a

2-nitro-  
benzofuran

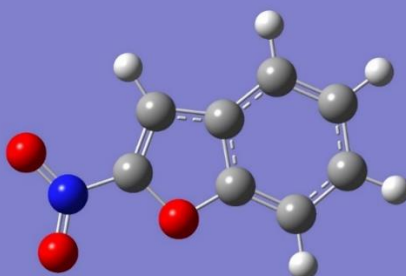

|   |   | X         | Y         | Z         |
|---|---|-----------|-----------|-----------|
| 1 | C | 2.4557000 | 2.2055000 | 0.0000000 |
| 2 | C | 1.2775000 | 2.9745000 | 0.0000000 |
| 3 | C | 0.0206000 | 2.3899000 | 0.0000000 |

|    |   |           |           |          |
|----|---|-----------|-----------|----------|
| 4  | C | 0.000000  | 1.005800  | 0.000000 |
| 5  | C | 1.155900  | 0.208200  | 0.000000 |
| 6  | C | 2.414600  | 0.824700  | 0.000000 |
| 7  | C | 0.695800  | -1.142600 | 0.000000 |
| 8  | C | -0.656500 | -1.042700 | 0.000000 |
| 9  | O | -1.115700 | 0.226800  | 0.000000 |
| 10 | N | -1.635200 | -2.071500 | 0.000000 |
| 11 | H | 3.321700  | 0.232900  | 0.000000 |
| 12 | H | 3.412900  | 2.713100  | 0.000000 |
| 13 | H | 1.354100  | 4.055500  | 0.000000 |
| 14 | H | -0.889000 | 2.976500  | 0.000000 |
| 15 | H | 1.275100  | -2.051600 | 0.000000 |
| 16 | O | -1.224000 | -3.223100 | 0.000000 |
| 17 | O | -2.811600 | -1.749500 | 0.000000 |

*anti-exo* cycloaddition

TS1

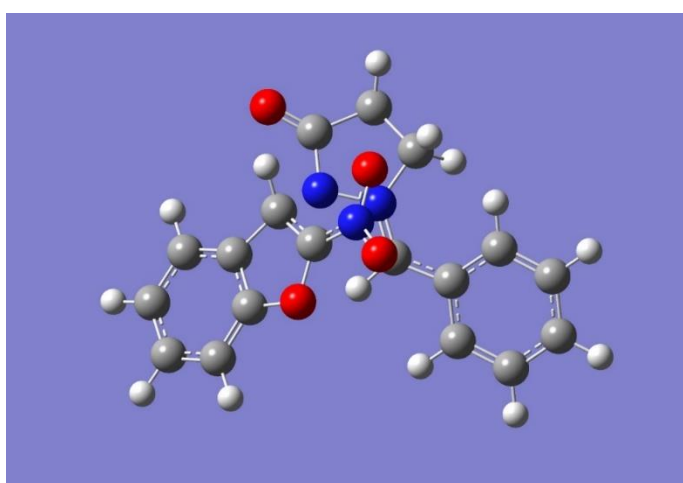

|    |   | X         | Y         | Z         |
|----|---|-----------|-----------|-----------|
| 1  | O | -1.071700 | -1.666200 | 1.075700  |
| 2  | O | 0.424000  | 1.173000  | 2.433600  |
| 3  | O | -2.039900 | 3.366300  | -0.471100 |
| 4  | N | 0.601700  | 1.260000  | -0.648600 |
| 5  | N | -0.742100 | 1.492200  | -0.626800 |
| 6  | N | 0.172100  | -0.043000 | 2.249400  |
| 7  | O | 0.761300  | -0.951100 | 2.861900  |
| 8  | C | -0.774000 | -0.339900 | 1.325400  |
| 9  | C | 2.366100  | -0.470700 | -0.714200 |
| 10 | C | -2.607100 | -0.327100 | 0.035500  |
| 11 | C | 1.016500  | 0.037000  | -0.802300 |
| 12 | C | -1.634300 | 0.579500  | 0.663400  |
| 13 | C | -2.187800 | -1.632100 | 0.299500  |
| 14 | C | -3.754200 | -0.109700 | -0.721700 |
| 15 | C | -4.449400 | -1.213800 | -1.197900 |
| 16 | C | 2.578700  | -1.728700 | -1.304300 |
| 17 | H | 1.749800  | -2.234200 | -1.787000 |
| 18 | C | -4.002600 | -2.512500 | -0.927800 |
| 19 | C | -2.859700 | -2.747700 | -0.172400 |
| 20 | C | -0.946700 | 2.862700  | -0.610400 |
| 21 | C | 3.437100  | 0.164000  | -0.064300 |
| 22 | H | 3.302800  | 1.108000  | 0.443200  |
| 23 | C | 1.392400  | 2.497800  | -0.449500 |
| 24 | H | 2.255600  | 2.468700  | -1.110000 |
| 25 | H | 1.708800  | 2.547800  | 0.591100  |
| 26 | C | 0.375900  | 3.571700  | -0.782000 |

|    |   |            |            |            |
|----|---|------------|------------|------------|
| 27 | H | 0.4292000  | 4.4360000  | -0.1228000 |
| 28 | H | 0.4621000  | 3.9131000  | -1.8165000 |
| 29 | C | 4.6856000  | -0.4372000 | -0.0378000 |
| 30 | H | 5.5040000  | 0.0579000  | 0.4712000  |
| 31 | C | 3.8323000  | -2.3165000 | -1.2829000 |
| 32 | H | 3.9834000  | -3.2813000 | -1.7522000 |
| 33 | C | 4.8903000  | -1.6697000 | -0.6516000 |
| 34 | H | 5.8717000  | -2.1294000 | -0.6285000 |
| 35 | H | -1.9674000 | 1.4727000  | 1.1788000  |
| 36 | H | -4.5618000 | -3.3579000 | -1.3123000 |
| 37 | H | -2.5137000 | -3.7508000 | 0.0440000  |
| 38 | H | -4.0933000 | 0.8962000  | -0.9386000 |
| 39 | H | -5.3468000 | -1.0710000 | -1.7883000 |
| 40 | H | 0.2485000  | -0.6596000 | -1.1171000 |

IM

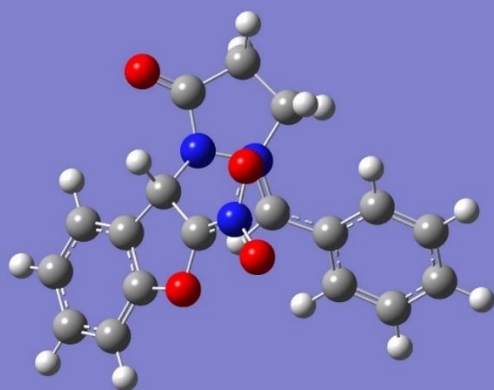

|    |   | X          | Y          | Z          |
|----|---|------------|------------|------------|
| 1  | O | -1.1736000 | -1.4998000 | 1.3860000  |
| 2  | O | 0.3512000  | 1.5168000  | 2.2617000  |
| 3  | O | -2.0107000 | 3.3818000  | -0.4544000 |
| 4  | N | 0.5859000  | 1.1806000  | -0.6410000 |
| 5  | N | -0.7498000 | 1.4739000  | -0.5023000 |
| 6  | N | 0.0581000  | 0.2762000  | 2.3112000  |
| 7  | O | 0.5678000  | -0.4943000 | 3.1678000  |
| 8  | C | -0.7836000 | -0.1700000 | 1.3889000  |
| 9  | C | 2.3075000  | -0.5743000 | -0.6408000 |
| 10 | C | -2.4683000 | -0.3698000 | -0.1378000 |
| 11 | C | 0.9580000  | -0.0642000 | -0.6925000 |
| 12 | C | -1.5813000 | 0.6791000  | 0.4736000  |
| 13 | C | -2.1687000 | -1.5898000 | 0.4609000  |
| 14 | C | -3.4606000 | -0.2967000 | -1.1035000 |
| 15 | C | -4.1372000 | -1.4630000 | -1.4520000 |
| 16 | C | 2.4907000  | -1.8729000 | -1.1447000 |
| 17 | H | 1.6386000  | -2.4120000 | -1.5433000 |
| 18 | C | -3.8215000 | -2.6764000 | -0.8376000 |
| 19 | C | -2.8275000 | -2.7630000 | 0.1325000  |
| 20 | C | -0.9534000 | 2.8384000  | -0.6616000 |
| 21 | C | 3.4050000  | 0.1092000  | -0.0937000 |
| 22 | H | 3.2880000  | 1.0878000  | 0.3497000  |
| 23 | C | 1.3843000  | 2.4216000  | -0.7068000 |
| 24 | H | 2.1890000  | 2.2806000  | -1.4237000 |
| 25 | H | 1.7815000  | 2.6362000  | 0.2834000  |
| 26 | C | 0.3436000  | 3.4466000  | -1.1225000 |
| 27 | H | 0.4893000  | 4.4177000  | -0.6549000 |
| 28 | H | 0.3050000  | 3.5775000  | -2.2068000 |
| 29 | C | 4.6546000  | -0.4890000 | -0.0833000 |
| 30 | H | 5.4959000  | 0.0404000  | 0.3479000  |
| 31 | C | 3.7461000  | -2.4569000 | -1.1424000 |

|     |                                                                                   |            |            |            |
|-----|-----------------------------------------------------------------------------------|------------|------------|------------|
| 32  | H                                                                                 | 3.8779000  | -3.4546000 | -1.5439000 |
| 33  | C                                                                                 | 4.8312000  | -1.7641000 | -0.6141000 |
| 34  | H                                                                                 | 5.8138000  | -2.2216000 | -0.6049000 |
| 35  | H                                                                                 | -2.1422000 | 1.4676000  | 0.9859000  |
| 36  | H                                                                                 | -4.3606000 | -3.5737000 | -1.1198000 |
| 37  | H                                                                                 | -2.5781000 | -3.7019000 | 0.6113000  |
| 38  | H                                                                                 | -3.7037000 | 0.6457000  | -1.5809000 |
| 39  | H                                                                                 | -4.9158000 | -1.4291000 | -2.2048000 |
| 40  | H                                                                                 | 0.1712000  | -0.7798000 | -0.8943000 |
| TS2 | 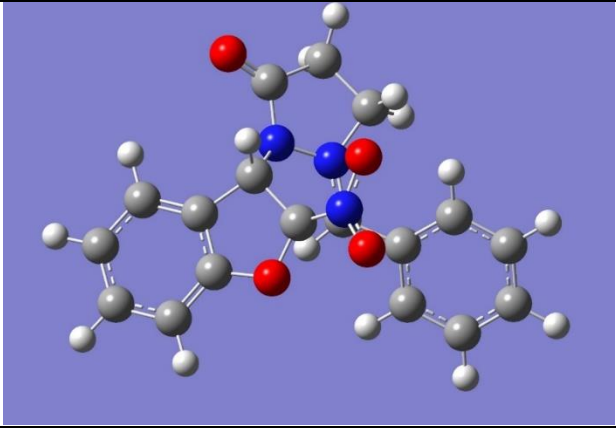 |            |            |            |
|     |                                                                                   | X          | Y          | Z          |
| 1   | O                                                                                 | -0.8386000 | -1.7827000 | 0.7699000  |
| 2   | O                                                                                 | 0.7785000  | 0.8967000  | 2.2439000  |
| 3   | O                                                                                 | -2.1812000 | 3.3260000  | 0.1059000  |
| 4   | N                                                                                 | 0.4794000  | 1.3444000  | -0.7131000 |
| 5   | N                                                                                 | -0.8589000 | 1.5228000  | -0.3909000 |
| 6   | N                                                                                 | 0.4838000  | -0.2896000 | 2.0004000  |
| 7   | O                                                                                 | 0.9907000  | -1.2509000 | 2.5871000  |
| 8   | C                                                                                 | -0.3759000 | -0.4932000 | 0.9374000  |
| 9   | C                                                                                 | 2.2316000  | -0.3976000 | -0.7137000 |
| 10  | C                                                                                 | -2.4921000 | -0.3631000 | 0.0430000  |
| 11  | C                                                                                 | 0.8494000  | 0.0587000  | -0.7768000 |
| 12  | C                                                                                 | -1.4170000 | 0.5323000  | 0.5879000  |
| 13  | C                                                                                 | -2.0753000 | -1.6792000 | 0.1930000  |
| 14  | C                                                                                 | -3.7286000 | -0.0890000 | -0.5198000 |
| 15  | C                                                                                 | -4.5242000 | -1.1577000 | -0.9267000 |
| 16  | C                                                                                 | 2.5525000  | -1.5689000 | -1.4147000 |
| 17  | H                                                                                 | 1.7834000  | -2.0687000 | -1.9932000 |
| 18  | C                                                                                 | -4.0833000 | -2.4720000 | -0.7677000 |
| 19  | C                                                                                 | -2.8431000 | -2.7593000 | -0.2035000 |
| 20  | C                                                                                 | -1.1387000 | 2.8751000  | -0.3095000 |
| 21  | C                                                                                 | 3.2248000  | 0.2349000  | 0.0469000  |
| 22  | H                                                                                 | 2.9973000  | 1.1181000  | 0.6272000  |
| 23  | C                                                                                 | 1.2063000  | 2.6094000  | -0.5519000 |
| 24  | H                                                                                 | 2.0170000  | 2.6543000  | -1.2753000 |
| 25  | H                                                                                 | 1.5956000  | 2.7174000  | 0.4613000  |
| 26  | C                                                                                 | 0.0853000  | 3.6116000  | -0.8043000 |
| 27  | H                                                                                 | 0.2084000  | 4.5472000  | -0.2633000 |
| 28  | H                                                                                 | -0.0366000 | 3.8283000  | -1.8692000 |
| 29  | C                                                                                 | 4.5107000  | -0.2861000 | 0.0814000  |
| 30  | H                                                                                 | 5.2719000  | 0.2089000  | 0.6730000  |
| 31  | C                                                                                 | 3.8400000  | -2.0813000 | -1.3793000 |
| 32  | H                                                                                 | 4.0770000  | -2.9825000 | -1.9328000 |
| 33  | C                                                                                 | 4.8235000  | -1.4383000 | -0.6334000 |
| 34  | H                                                                                 | 5.8310000  | -1.8372000 | -0.6046000 |
| 35  | H                                                                                 | -1.7448000 | 1.1201000  | 1.4489000  |
| 36  | H                                                                                 | -4.7168000 | -3.2907000 | -1.0896000 |

|                                                                                                                                                                                                                                |   |            |            |            |
|--------------------------------------------------------------------------------------------------------------------------------------------------------------------------------------------------------------------------------|---|------------|------------|------------|
| 37                                                                                                                                                                                                                             | H | -2.4941000 | -3.7769000 | -0.0796000 |
| 38                                                                                                                                                                                                                             | H | -4.0685000 | 0.9324000  | -0.6449000 |
| 39                                                                                                                                                                                                                             | H | -5.4938000 | -0.9674000 | -1.3714000 |
| 40                                                                                                                                                                                                                             | H | 0.1737000  | -0.5780000 | -1.3437000 |
| <div style="display: flex; align-items: center; justify-content: center;"> <div style="margin-right: 20px;"><i>cis-product</i></div> 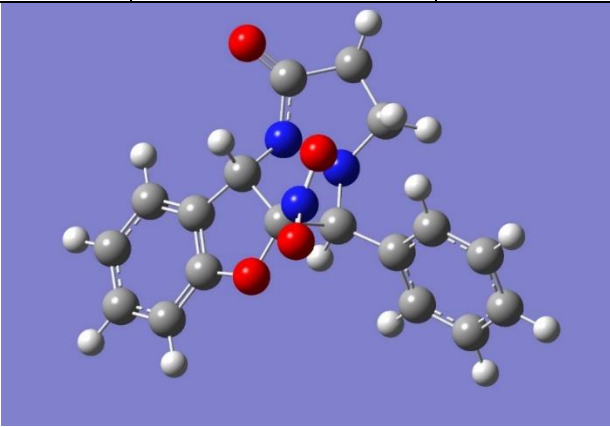 </div> |   |            |            |            |
|                                                                                                                                                                                                                                |   | X          | Y          | Z          |
| 1                                                                                                                                                                                                                              | O | -0.7552000 | -1.6515000 | 0.7578000  |
| 2                                                                                                                                                                                                                              | O | 0.7510000  | 1.1079000  | 2.1694000  |
| 3                                                                                                                                                                                                                              | O | -1.8290000 | 3.5500000  | 0.2638000  |
| 4                                                                                                                                                                                                                              | N | 0.3636000  | 1.1938000  | -1.0702000 |
| 5                                                                                                                                                                                                                              | N | -0.8743000 | 1.6002000  | -0.4644000 |
| 6                                                                                                                                                                                                                              | N | 0.4563000  | -0.0614000 | 1.9967000  |
| 7                                                                                                                                                                                                                              | O | 0.7200000  | -0.9698000 | 2.7455000  |
| 8                                                                                                                                                                                                                              | C | -0.2509000 | -0.3530000 | 0.7053000  |
| 9                                                                                                                                                                                                                              | C | 2.0922000  | -0.5762000 | -0.5277000 |
| 10                                                                                                                                                                                                                             | C | -2.4691000 | -0.3263000 | -0.0271000 |
| 11                                                                                                                                                                                                                             | C | 0.6451000  | -0.1491000 | -0.5645000 |
| 12                                                                                                                                                                                                                             | C | -1.4189000 | 0.6355000  | 0.4591000  |
| 13                                                                                                                                                                                                                             | C | -2.0190000 | -1.6148000 | 0.2131000  |
| 14                                                                                                                                                                                                                             | C | -3.7266000 | -0.1208000 | -0.5693000 |
| 15                                                                                                                                                                                                                             | C | -4.5073000 | -1.2351000 | -0.8705000 |
| 16                                                                                                                                                                                                                             | C | 2.4796000  | -1.5836000 | -1.4157000 |
| 17                                                                                                                                                                                                                             | H | 1.7441000  | -2.0089000 | -2.0901000 |
| 18                                                                                                                                                                                                                             | C | -4.0332000 | -2.5222000 | -0.6203000 |
| 19                                                                                                                                                                                                                             | C | -2.7705000 | -2.7384000 | -0.0717000 |
| 20                                                                                                                                                                                                                             | C | -0.9371000 | 2.9566000  | -0.3112000 |
| 21                                                                                                                                                                                                                             | C | 3.0547000  | -0.0390000 | 0.3328000  |
| 22                                                                                                                                                                                                                             | H | 2.8047000  | 0.7436000  | 1.0364000  |
| 23                                                                                                                                                                                                                             | C | 1.2685000  | 2.3410000  | -0.8708000 |
| 24                                                                                                                                                                                                                             | H | 2.0436000  | 2.3329000  | -1.6346000 |
| 25                                                                                                                                                                                                                             | H | 1.7280000  | 2.3507000  | 0.1208000  |
| 26                                                                                                                                                                                                                             | C | 0.2976000  | 3.5090000  | -0.9887000 |
| 27                                                                                                                                                                                                                             | H | 0.6376000  | 4.4166000  | -0.4948000 |
| 28                                                                                                                                                                                                                             | H | 0.0594000  | 3.7372000  | -2.0322000 |
| 29                                                                                                                                                                                                                             | C | 4.3645000  | -0.5032000 | 0.3018000  |
| 30                                                                                                                                                                                                                             | H | 5.0958000  | -0.0760000 | 0.9784000  |
| 31                                                                                                                                                                                                                             | C | 3.7895000  | -2.0454000 | -1.4479000 |
| 32                                                                                                                                                                                                                             | H | 4.0666000  | -2.8274000 | -2.1454000 |
| 33                                                                                                                                                                                                                             | C | 4.7370000  | -1.5055000 | -0.5866000 |
| 34                                                                                                                                                                                                                             | H | 5.7602000  | -1.8632000 | -0.6065000 |
| 35                                                                                                                                                                                                                             | H | -1.7461000 | 1.1631000  | 1.3583000  |
| 36                                                                                                                                                                                                                             | H | -4.6551000 | -3.3771000 | -0.8597000 |
| 37                                                                                                                                                                                                                             | H | -2.3934000 | -3.7352000 | 0.1197000  |
| 38                                                                                                                                                                                                                             | H | -4.0909000 | 0.8823000  | -0.7588000 |
| 39                                                                                                                                                                                                                             | H | -5.4916000 | -1.1006000 | -1.3030000 |
| 40                                                                                                                                                                                                                             | H | 0.1472000  | -0.8362000 | -1.2564000 |

### 3-Nitrobenzothiophene + azomethine imine 2a

3-nitrobenzothiophene

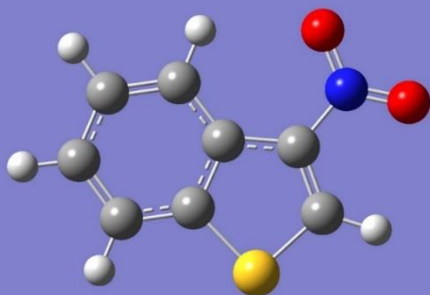

|    |   | X          | Y          | Z         |
|----|---|------------|------------|-----------|
| 1  | C | -0.7036000 | 2.7696000  | 0.0000000 |
| 2  | C | -2.0478000 | 2.3779000  | 0.0000000 |
| 3  | C | -2.3907000 | 1.0377000  | 0.0000000 |
| 4  | C | -1.3608000 | 0.1007000  | 0.0000000 |
| 5  | C | 0.0000000  | 0.4724000  | 0.0000000 |
| 6  | C | 0.3190000  | 1.8382000  | 0.0000000 |
| 7  | C | 0.8235000  | -0.7117000 | 0.0000000 |
| 8  | C | 0.1288000  | -1.8832000 | 0.0000000 |
| 9  | S | -1.5594000 | -1.6360000 | 0.0000000 |
| 10 | H | 1.3514000  | 2.1551000  | 0.0000000 |
| 11 | H | -0.4572000 | 3.8249000  | 0.0000000 |
| 12 | H | -2.8287000 | 3.1292000  | 0.0000000 |
| 13 | H | -3.4282000 | 0.7261000  | 0.0000000 |
| 14 | H | 0.5376000  | -2.8828000 | 0.0000000 |
| 15 | N | 2.2585000  | -0.7268000 | 0.0000000 |
| 16 | O | 2.8267000  | -1.8089000 | 0.0000000 |
| 17 | O | 2.8428000  | 0.3466000  | 0.0000000 |

*anti-exo* Cycloaddition

TS1

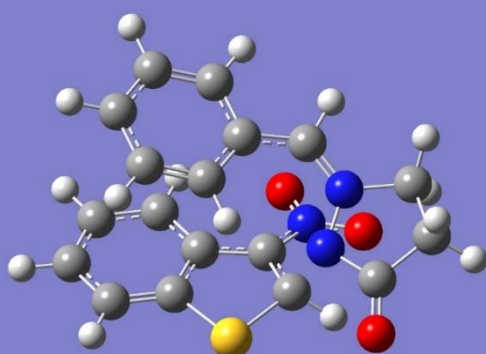

|   |   | X          | Y          | Z          |
|---|---|------------|------------|------------|
| 1 | O | -1.9664000 | -0.7702000 | 2.3776000  |
| 2 | O | -3.4295000 | -1.1736000 | -1.8774000 |
| 3 | N | -1.9598000 | 1.1653000  | 0.0628000  |
| 4 | N | -1.8757000 | 0.0940000  | -0.7778000 |
| 5 | N | -0.7245000 | -0.7892000 | 2.2452000  |
| 6 | O | 0.0364000  | -0.5721000 | 3.2025000  |
| 7 | C | -0.1961000 | -1.0709000 | 1.0037000  |

|    |   |            |            |            |
|----|---|------------|------------|------------|
| 8  | C | 0.3674000  | 2.0128000  | -0.1429000 |
| 9  | C | 1.2071000  | -1.1828000 | 0.6882000  |
| 10 | C | -0.9635000 | 1.9252000  | 0.4032000  |
| 11 | H | -1.2219000 | 2.6451000  | 1.1719000  |
| 12 | C | -1.0797000 | -1.3957000 | -0.0717000 |
| 13 | H | -2.0080000 | -1.9034000 | 0.1560000  |
| 14 | C | 1.3894000  | -1.7536000 | -0.5876000 |
| 15 | C | 2.3456000  | -0.8190000 | 1.4170000  |
| 16 | H | 2.2332000  | -0.3811000 | 2.3985000  |
| 17 | C | 3.6072000  | -1.0338000 | 0.8741000  |
| 18 | C | 1.2573000  | 2.8518000  | 0.5503000  |
| 19 | H | 0.9306000  | 3.3314000  | 1.4665000  |
| 20 | C | 3.7624000  | -1.6053000 | -0.3881000 |
| 21 | H | 4.7539000  | -1.7685000 | -0.7944000 |
| 22 | C | 2.6447000  | -1.9694000 | -1.1331000 |
| 23 | H | 2.7551000  | -2.4123000 | -2.1163000 |
| 24 | C | -3.1725000 | -0.2122000 | -1.1888000 |
| 25 | C | 0.7855000  | 1.4121000  | -1.3411000 |
| 26 | H | 0.1106000  | 0.7699000  | -1.8897000 |
| 27 | C | -3.3522000 | 1.4034000  | 0.5258000  |
| 28 | H | -3.4968000 | 2.4705000  | 0.6695000  |
| 29 | H | -3.4936000 | 0.8640000  | 1.4614000  |
| 30 | C | -4.1437000 | 0.7933000  | -0.6133000 |
| 31 | H | -5.0569000 | 0.2939000  | -0.2960000 |
| 32 | H | -4.3912000 | 1.5316000  | -1.3805000 |
| 33 | C | 2.0582000  | 1.6600000  | -1.8285000 |
| 34 | H | 2.3705000  | 1.2049000  | -2.7610000 |
| 35 | C | 2.5372000  | 3.0703000  | 0.0693000  |
| 36 | H | 3.2179000  | 3.7110000  | 0.6174000  |
| 37 | C | 2.9393000  | 2.4768000  | -1.1237000 |
| 38 | H | 3.9376000  | 2.6534000  | -1.5075000 |
| 39 | H | 4.4842000  | -0.7516000 | 1.4459000  |
| 40 | S | -0.1432000 | -2.1751000 | -1.3532000 |

IM

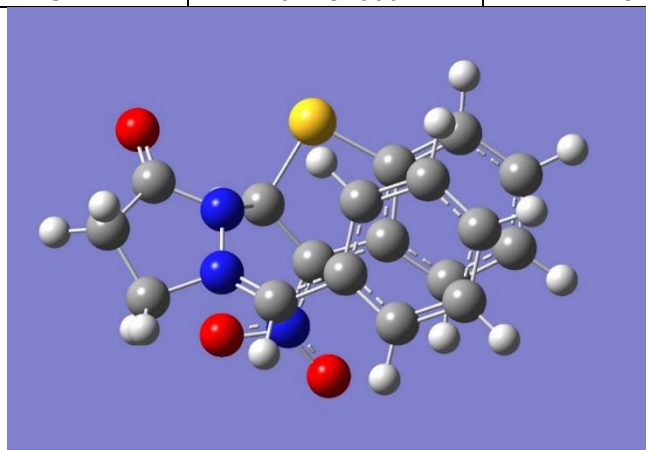

|    |   | X          | Y          | Z          |
|----|---|------------|------------|------------|
| 1  | O | -1.9280000 | -0.8758000 | 2.3000000  |
| 2  | O | -3.4054000 | -1.2906000 | -1.7941000 |
| 3  | N | -1.9950000 | 1.0582000  | 0.2163000  |
| 4  | N | -1.9007000 | -0.0443000 | -0.6085000 |
| 5  | N | -0.6697000 | -0.8870000 | 2.1843000  |
| 6  | O | 0.0709000  | -0.7682000 | 3.1884000  |
| 7  | C | -0.1404000 | -1.0250000 | 0.9455000  |
| 8  | C | 0.2942000  | 1.9940000  | -0.0377000 |
| 9  | C | 1.2567000  | -1.1596000 | 0.6278000  |
| 10 | C | -1.0260000 | 1.8607000  | 0.5246000  |
| 11 | H | -1.3083000 | 2.5813000  | 1.2854000  |



|    |   |            |            |            |
|----|---|------------|------------|------------|
| 12 | C | -1.0750000 | -1.2583000 | -0.1779000 |
| 13 | H | -1.8339000 | -2.0025000 | 0.0616000  |
| 14 | C | 1.4539000  | -1.5977000 | -0.6979000 |
| 15 | C | 2.3891000  | -0.9260000 | 1.4180000  |
| 16 | H | 2.2603000  | -0.5960000 | 2.4389000  |
| 17 | C | 3.6597000  | -1.1316000 | 0.8870000  |
| 18 | C | 1.2128000  | 2.7531000  | 0.7055000  |
| 19 | H | 0.9258000  | 3.1307000  | 1.6806000  |
| 20 | C | 3.8287000  | -1.5673000 | -0.4240000 |
| 21 | H | 4.8234000  | -1.7262000 | -0.8244000 |
| 22 | C | 2.7145000  | -1.8063000 | -1.2286000 |
| 23 | H | 2.8358000  | -2.1501000 | -2.2497000 |
| 24 | C | -3.1732000 | -0.3150000 | -1.1261000 |
| 25 | C | 0.6490000  | 1.5367000  | -1.3154000 |
| 26 | H | -0.0560000 | 0.9726000  | -1.9110000 |
| 27 | C | -3.4109000 | 1.2902000  | 0.5814000  |
| 28 | H | -3.5593000 | 2.3481000  | 0.7765000  |
| 29 | H | -3.6308000 | 0.6910000  | 1.4639000  |
| 30 | C | -4.1160000 | 0.7612000  | -0.6562000 |
| 31 | H | -5.0969000 | 0.3379000  | -0.4526000 |
| 32 | H | -4.2077000 | 1.5274000  | -1.4309000 |
| 33 | C | 1.8998000  | 1.8349000  | -1.8281000 |
| 34 | H | 2.1646000  | 1.4954000  | -2.8224000 |
| 35 | C | 2.4737000  | 3.0163000  | 0.1974000  |
| 36 | H | 3.1829000  | 3.5896000  | 0.7825000  |
| 37 | C | 2.8178000  | 2.5601000  | -1.0715000 |
| 38 | H | 3.7994000  | 2.7770000  | -1.4769000 |
| 39 | H | 4.5290000  | -0.9488000 | 1.5090000  |
| 40 | S | -0.0638000 | -1.8976000 | -1.5545000 |

TS2

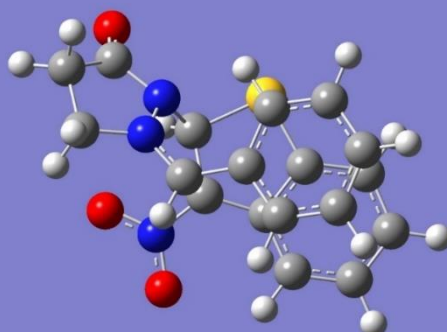

|    |   | X          | Y          | Z          |
|----|---|------------|------------|------------|
| 1  | O | 2.1314000  | -2.0165000 | -1.1831000 |
| 2  | O | 3.6143000  | -0.1045000 | 2.0555000  |
| 3  | N | 1.8868000  | 0.8279000  | -0.7281000 |
| 4  | N | 1.9314000  | 0.3995000  | 0.5876000  |
| 5  | N | 0.8897000  | -1.9933000 | -1.2283000 |
| 6  | O | 0.2490000  | -2.6162000 | -2.0808000 |
| 7  | C | 0.2293000  | -1.1820000 | -0.2997000 |
| 8  | C | -0.4798000 | 1.5371000  | -0.8881000 |
| 9  | C | -1.1905000 | -1.3181000 | -0.0162000 |
| 10 | C | 0.7057000  | 0.8103000  | -1.3399000 |
| 11 | H | 0.7781000  | 0.6568000  | -2.4143000 |
| 12 | C | 1.0554000  | -0.7784000 | 0.8837000  |
| 13 | H | 1.7397000  | -1.5672000 | 1.1952000  |
| 14 | C | -1.5133000 | -0.9135000 | 1.2907000  |
| 15 | C | -2.2255000 | -1.7382000 | -0.8564000 |
| 16 | H | -2.0013000 | -2.0491000 | -1.8663000 |

|    |   |            |            |            |
|----|---|------------|------------|------------|
| 17 | C | -3.5346000 | -1.7608000 | -0.3867000 |
| 18 | C | -1.6245000 | 1.4812000  | -1.6930000 |
| 19 | H | -1.6164000 | 0.8707000  | -2.5890000 |
| 20 | C | -3.8323000 | -1.3563000 | 0.9111000  |
| 21 | H | -4.8558000 | -1.3756000 | 1.2676000  |
| 22 | C | -2.8173000 | -0.9286000 | 1.7625000  |
| 23 | H | -3.0426000 | -0.6226000 | 2.7776000  |
| 24 | C | 3.2599000  | 0.3803000  | 1.0086000  |
| 25 | C | -0.4816000 | 2.3540000  | 0.2488000  |
| 26 | H | 0.4032000  | 2.4264000  | 0.8684000  |
| 27 | C | 3.2329000  | 0.8528000  | -1.3241000 |
| 28 | H | 3.2943000  | 1.6969000  | -2.0066000 |
| 29 | H | 3.4451000  | -0.0766000 | -1.8510000 |
| 30 | C | 4.0950000  | 1.0144000  | -0.0768000 |
| 31 | H | 5.0599000  | 0.5162000  | -0.1419000 |
| 32 | H | 4.2567000  | 2.0673000  | 0.1699000  |
| 33 | C | -1.6097000 | 3.0939000  | 0.5699000  |
| 34 | H | -1.5982000 | 3.7345000  | 1.4443000  |
| 35 | C | -2.7540000 | 2.2143000  | -1.3597000 |
| 36 | H | -3.6340000 | 2.1647000  | -1.9905000 |
| 37 | C | -2.7501000 | 3.0210000  | -0.2261000 |
| 38 | H | -3.6295000 | 3.6002000  | 0.0319000  |
| 39 | H | -4.3292000 | -2.0945000 | -1.0442000 |
| 40 | S | -0.1107000 | -0.4619000 | 2.2591000  |

*trans*-  
product

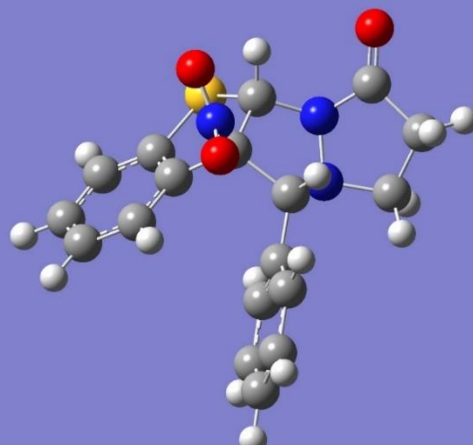

|    |   | X          | Y          | Z          |
|----|---|------------|------------|------------|
| 1  | O | 1.1631000  | 1.4292000  | 2.6617000  |
| 2  | O | 4.3099000  | -0.5494000 | 0.2335000  |
| 3  | N | 1.0841000  | -1.0502000 | -1.0046000 |
| 4  | N | 2.2121000  | -0.2628000 | -0.6563000 |
| 5  | N | 0.4681000  | 0.5612000  | 2.1801000  |
| 6  | O | -0.2343000 | -0.1981000 | 2.8110000  |
| 7  | C | 0.3989000  | 0.4608000  | 0.6545000  |
| 8  | C | -1.1039000 | -1.5996000 | -0.0215000 |
| 9  | C | -0.6824000 | 1.4130000  | 0.2214000  |
| 10 | C | 0.2707000  | -1.0444000 | 0.2291000  |
| 11 | H | 0.7583000  | -1.6336000 | 1.0169000  |
| 12 | C | 1.7586000  | 0.9009000  | 0.0295000  |
| 13 | H | 2.4950000  | 1.1984000  | 0.7721000  |
| 14 | C | -0.2600000 | 2.3971000  | -0.6727000 |
| 15 | C | -2.0057000 | 1.3840000  | 0.6486000  |
| 16 | H | -2.3379000 | 0.6300000  | 1.3522000  |
| 17 | C | -2.9011000 | 2.3330000  | 0.1711000  |
| 18 | C | -1.6881000 | -2.4504000 | 0.9160000  |
| 19 | H | -1.1498000 | -2.6958000 | 1.8244000  |

|    |   |            |            |            |
|----|---|------------|------------|------------|
| 20 | C | -2.4745000 | 3.3016000  | -0.7343000 |
| 21 | H | -3.1763000 | 4.0386000  | -1.1075000 |
| 22 | C | -1.1535000 | 3.3450000  | -1.1622000 |
| 23 | H | -0.8254000 | 4.1083000  | -1.8574000 |
| 24 | C | 3.3102000  | -1.0108000 | -0.2736000 |
| 25 | C | -1.7973000 | -1.3050000 | -1.1970000 |
| 26 | H | -1.3452000 | -0.6576000 | -1.9386000 |
| 27 | C | 1.6690000  | -2.3539000 | -1.3779000 |
| 28 | H | 1.8283000  | -2.3503000 | -2.4568000 |
| 29 | H | 0.9693000  | -3.1503000 | -1.1326000 |
| 30 | C | 3.0015000  | -2.4444000 | -0.6343000 |
| 31 | H | 2.9461000  | -3.0126000 | 0.2977000  |
| 32 | H | 3.8007000  | -2.8711000 | -1.2395000 |
| 33 | C | -3.0580000 | -1.8445000 | -1.4224000 |
| 34 | H | -3.5864000 | -1.6101000 | -2.3398000 |
| 35 | C | -2.9522000 | -2.9854000 | 0.6932000  |
| 36 | H | -3.3948000 | -3.6454000 | 1.4307000  |
| 37 | C | -3.6407000 | -2.6823000 | -0.4765000 |
| 38 | H | -4.6245000 | -3.1024000 | -0.6536000 |
| 39 | H | -3.9314000 | 2.3160000  | 0.5048000  |
| 40 | S | 1.4479000  | 2.3350000  | -1.0815000 |

### 1-Mesyl-3-nitroindole + azomethine imine 2a

*anti-exo* cycloaddition

1-mesyl-3-nitroindole

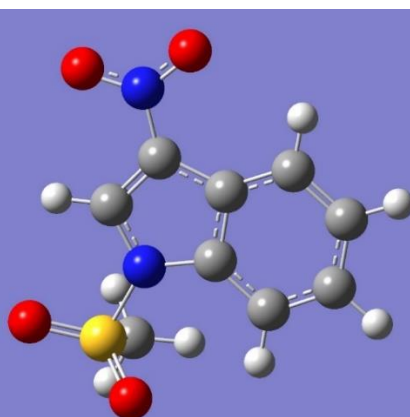

|   |   | X         | Y          | Z          |
|---|---|-----------|------------|------------|
| 1 | O | 2.4497000 | -2.8709000 | 0.0022000  |
| 2 | N | 2.5879000 | -1.6544000 | 0.0252000  |
| 3 | O | 3.6738000 | -1.0923000 | 0.0877000  |
| 4 | C | 1.4299000 | -0.8394000 | -0.0208000 |
| 5 | C | 1.3683000 | 0.5964000  | -0.0127000 |

|    |   |            |            |            |
|----|---|------------|------------|------------|
| 6  | C | 0.1601000  | -1.3450000 | -0.0841000 |
| 7  | C | -0.0043000 | 0.9137000  | -0.0806000 |
| 8  | C | 2.3098000  | 1.6273000  | 0.0431000  |
| 9  | H | 3.3661000  | 1.4028000  | 0.0929000  |
| 10 | C | 1.8537000  | 2.9347000  | 0.0354000  |
| 11 | C | 0.4859000  | 3.2289000  | -0.0301000 |
| 12 | H | 0.1615000  | 4.2626000  | -0.0369000 |
| 13 | C | -0.4670000 | 2.2242000  | -0.0918000 |
| 14 | H | -1.5210000 | 2.4585000  | -0.1537000 |
| 15 | H | 2.5691000  | 3.7475000  | 0.0796000  |
| 16 | H | -0.1808000 | -2.3669000 | -0.1077000 |
| 17 | N | -0.7115000 | -0.2981000 | -0.1279000 |
| 18 | S | -2.4237000 | -0.5024000 | -0.1244000 |
| 19 | O | -2.9528000 | 0.5059000  | -1.0177000 |
| 20 | O | -2.6287000 | -1.9097000 | -0.3963000 |
| 21 | C | -2.8474000 | -0.1238000 | 1.5487000  |
| 22 | H | -3.9315000 | -0.2265000 | 1.6216000  |
| 23 | H | -2.3443000 | -0.8379000 | 2.1993000  |
| 24 | H | -2.5431000 | 0.9003000  | 1.7633000  |

TS1

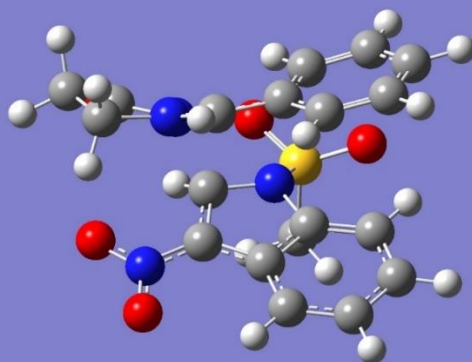

|    |   | X          | Y          | Z          |
|----|---|------------|------------|------------|
| 1  | O | -3.2221000 | -0.3144000 | 1.5207000  |
| 2  | O | -3.2588000 | -1.0875000 | -1.7651000 |
| 3  | N | -1.6588000 | 1.6529000  | -0.5952000 |
| 4  | N | -1.6341000 | 0.3524000  | -1.0284000 |
| 5  | N | -2.1423000 | -0.1241000 | 2.1262000  |
| 6  | O | -2.1075000 | 0.3003000  | 3.2970000  |
| 7  | C | -0.9787000 | -0.3824000 | 1.4677000  |
| 8  | C | 0.7407000  | 2.2258000  | -0.8639000 |
| 9  | C | 0.3657000  | -0.2078000 | 1.9397000  |
| 10 | C | -0.6267000 | 2.4191000  | -0.4423000 |
| 11 | H | -0.8647000 | 3.3706000  | 0.0215000  |
| 12 | C | -0.9650000 | -0.9015000 | 0.1313000  |
| 13 | H | -1.6843000 | -1.6371000 | -0.2118000 |
| 14 | C | 1.2077000  | -0.7063000 | 0.9276000  |
| 15 | C | 0.9288000  | 0.3243000  | 3.0986000  |
| 16 | H | 0.2909000  | 0.7072000  | 3.8834000  |
| 17 | C | 2.3160000  | 0.3418000  | 3.2195000  |
| 18 | C | 1.6905000  | 3.0982000  | -0.3097000 |
| 19 | H | 1.3827000  | 3.8044000  | 0.4534000  |
| 20 | C | 3.1334000  | -0.1479000 | 2.2037000  |
| 21 | H | 4.2110000  | -0.1197000 | 2.3157000  |
| 22 | C | 2.5857000  | -0.6721000 | 1.0310000  |
| 23 | H | 3.2186000  | -1.0448000 | 0.2381000  |
| 24 | C | -2.9405000 | 0.0169000  | -1.3879000 |

|    |   |            |            |            |
|----|---|------------|------------|------------|
| 25 | C | 1.1292000  | 1.3358000  | -1.8761000 |
| 26 | H | 0.4018000  | 0.6683000  | -2.3163000 |
| 27 | C | -3.0429000 | 2.1519000  | -0.3653000 |
| 28 | H | -3.0818000 | 3.1997000  | -0.6485000 |
| 29 | H | -3.2827000 | 2.0325000  | 0.6899000  |
| 30 | C | -3.8459000 | 1.2194000  | -1.2427000 |
| 31 | H | -4.7969000 | 0.9208000  | -0.8081000 |
| 32 | H | -4.0261000 | 1.6447000  | -2.2332000 |
| 33 | C | 2.4397000  | 1.3331000  | -2.3220000 |
| 34 | H | 2.7327000  | 0.6596000  | -3.1184000 |
| 35 | C | 3.0082000  | 3.0623000  | -0.7362000 |
| 36 | H | 3.7380000  | 3.7299000  | -0.2940000 |
| 37 | C | 3.3825000  | 2.1836000  | -1.7476000 |
| 38 | H | 4.4094000  | 2.1635000  | -2.0946000 |
| 39 | H | 2.7656000  | 0.7473000  | 4.1190000  |
| 40 | N | 0.3933000  | -1.1774000 | -0.1436000 |
| 41 | S | 0.8155000  | -2.5489000 | -1.0508000 |
| 42 | C | 0.7376000  | -3.8854000 | 0.1125000  |
| 43 | H | 1.0260000  | -4.7876000 | -0.4288000 |
| 44 | H | 1.4385000  | -3.6849000 | 0.9218000  |
| 45 | H | -0.2844000 | -3.9685000 | 0.4802000  |
| 46 | O | -0.2242000 | -2.7100000 | -2.0484000 |
| 47 | O | 2.1944000  | -2.3635000 | -1.4662000 |

IM

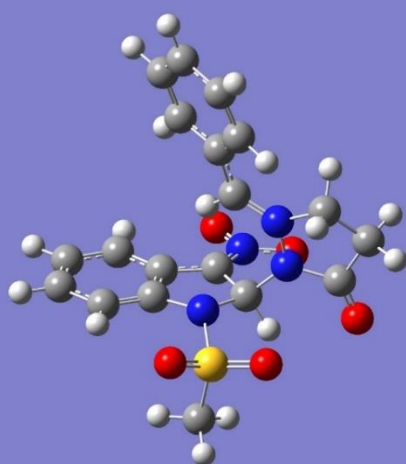

|    |   | X          | Y          | Z          |
|----|---|------------|------------|------------|
| 1  | O | 1.1343000  | -0.9292000 | 3.2925000  |
| 2  | O | 1.5870000  | -3.4191000 | 1.0656000  |
| 3  | N | -1.0725000 | -1.4191000 | 0.2291000  |
| 4  | N | 0.2424000  | -1.6336000 | 0.5602000  |
| 5  | N | 1.0908000  | 0.2662000  | 2.8896000  |
| 6  | O | 1.0052000  | 1.2259000  | 3.7024000  |
| 7  | C | 1.1254000  | 0.5108000  | 1.5714000  |
| 8  | C | -2.9634000 | 0.1003000  | -0.1891000 |
| 9  | C | 1.1586000  | 1.7789000  | 0.9125000  |
| 10 | C | -1.6181000 | -0.2477000 | 0.2065000  |
| 11 | H | -0.9971000 | 0.5635000  | 0.5660000  |
| 12 | C | 1.2781000  | -0.5967000 | 0.5731000  |
| 13 | H | 2.1781000  | -1.1984000 | 0.7402000  |
| 14 | C | 1.2826000  | 1.5423000  | -0.4720000 |
| 15 | C | 1.0772000  | 3.0957000  | 1.3709000  |
| 16 | H | 0.9800000  | 3.2827000  | 2.4312000  |
| 17 | C | 1.1361000  | 4.1391000  | 0.4484000  |
| 18 | C | -3.4262000 | 1.3278000  | 0.3152000  |
| 19 | H | -2.7761000 | 1.9204000  | 0.9488000  |
| 20 | C | 1.2567000  | 3.8848000  | -0.9129000 |

|    |   |            |            |            |
|----|---|------------|------------|------------|
| 21 | H | 1.2948000  | 4.7059000  | -1.6192000 |
| 22 | C | 1.3210000  | 2.5716000  | -1.3921000 |
| 23 | H | 1.4003000  | 2.3732000  | -2.4517000 |
| 24 | C | 0.5012000  | -2.9781000 | 0.7923000  |
| 25 | C | -3.7927000 | -0.6465000 | -1.0413000 |
| 26 | H | -3.4480000 | -1.5631000 | -1.4974000 |
| 27 | C | -1.7119000 | -2.7268000 | -0.0447000 |
| 28 | H | -1.7152000 | -2.8762000 | -1.1242000 |
| 29 | H | -2.7271000 | -2.7025000 | 0.3407000  |
| 30 | C | -0.8005000 | -3.7144000 | 0.6533000  |
| 31 | H | -1.1581000 | -3.9652000 | 1.6547000  |
| 32 | H | -0.6595000 | -4.6329000 | 0.0883000  |
| 33 | C | -5.0607000 | -0.1814000 | -1.3491000 |
| 34 | H | -5.6910000 | -0.7563000 | -2.0170000 |
| 35 | C | -4.7030000 | 1.7732000  | 0.0182000  |
| 36 | H | -5.0540000 | 2.7139000  | 0.4248000  |
| 37 | C | -5.5232000 | 1.0176000  | -0.8135000 |
| 38 | H | -6.5194000 | 1.3689000  | -1.0566000 |
| 39 | H | 1.0833000  | 5.1633000  | 0.8010000  |
| 40 | N | 1.3052000  | 0.1332000  | -0.7083000 |
| 41 | S | 2.1591000  | -0.5429000 | -1.9922000 |
| 42 | O | 1.9241000  | -1.9744000 | -1.9051000 |
| 43 | O | 1.7591000  | 0.1755000  | -3.1907000 |
| 44 | C | 3.8684000  | -0.2051000 | -1.6568000 |
| 45 | H | 4.1405000  | -0.6807000 | -0.7150000 |
| 46 | H | 4.4416000  | -0.6327000 | -2.4802000 |
| 47 | H | 4.0088000  | 0.8745000  | -1.6127000 |

TS2

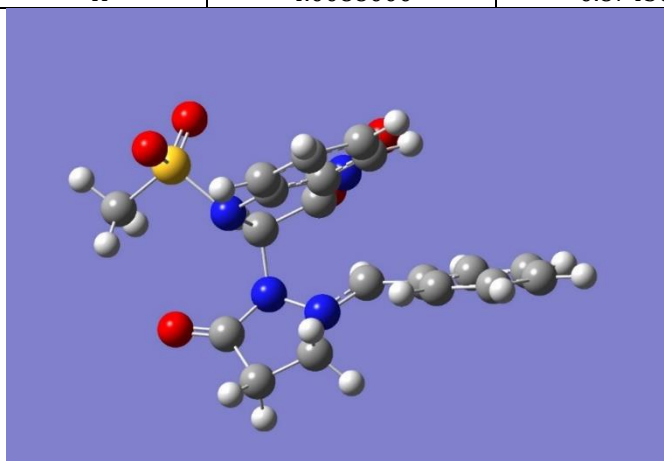

|    |   | X          | Y          | Z          |
|----|---|------------|------------|------------|
| 1  | O | -0.2540000 | -0.3147000 | 3.1610000  |
| 2  | O | 2.3995000  | -3.0240000 | -0.4812000 |
| 3  | N | -0.7766000 | -1.7928000 | -0.3064000 |
| 4  | N | 0.5077000  | -1.9051000 | 0.1968000  |
| 5  | N | -0.4894000 | 0.5705000  | 2.3187000  |
| 6  | O | -1.1499000 | 1.5828000  | 2.5828000  |
| 7  | C | -0.0848000 | 0.3405000  | 1.0118000  |
| 8  | C | -2.8980000 | -0.6425000 | 0.1554000  |
| 9  | C | -0.0511000 | 1.3627000  | -0.0163000 |
| 10 | C | -1.6048000 | -1.1828000 | 0.5336000  |
| 11 | H | -1.4736000 | -1.4712000 | 1.5757000  |
| 12 | C | 1.0575000  | -0.6076000 | 0.7434000  |
| 13 | H | 1.6349000  | -0.8505000 | 1.6309000  |
| 14 | C | 1.0676000  | 1.1234000  | -0.8254000 |
| 15 | C | -0.9348000 | 2.3881000  | -0.3485000 |
| 16 | H | -1.7933000 | 2.5942000  | 0.2758000  |
| 17 | C | -0.6844000 | 3.1392000  | -1.4921000 |

|    |   |            |            |            |
|----|---|------------|------------|------------|
| 18 | C | -3.8867000 | -0.5819000 | 1.1483000  |
| 19 | H | -3.6655000 | -0.9541000 | 2.1422000  |
| 20 | C | 0.4111000  | 2.8608000  | -2.3085000 |
| 21 | H | 0.5762000  | 3.4452000  | -3.2063000 |
| 22 | C | 1.3030000  | 1.8405000  | -1.9860000 |
| 23 | H | 2.1613000  | 1.6285000  | -2.6080000 |
| 24 | C | 1.2343000  | -2.7577000 | -0.6347000 |
| 25 | C | -3.1808000 | -0.1449000 | -1.1247000 |
| 26 | H | -2.4234000 | -0.1446000 | -1.8970000 |
| 27 | C | -0.8314000 | -2.2169000 | -1.7062000 |
| 28 | H | -0.6171000 | -1.3857000 | -2.3819000 |
| 29 | H | -1.8141000 | -2.6296000 | -1.9213000 |
| 30 | C | 0.2947000  | -3.2462000 | -1.7163000 |
| 31 | H | -0.0661000 | -4.2422000 | -1.4455000 |
| 32 | H | 0.8224000  | -3.3097000 | -2.6658000 |
| 33 | C | -4.4360000 | 0.3737000  | -1.4051000 |
| 34 | H | -4.6481000 | 0.7567000  | -2.3964000 |
| 35 | C | -5.1396000 | -0.0638000 | 0.8600000  |
| 36 | H | -5.8996000 | -0.0288000 | 1.6318000  |
| 37 | C | -5.4171000 | 0.4115000  | -0.4182000 |
| 38 | H | -6.3964000 | 0.8177000  | -0.6445000 |
| 39 | H | -1.3612000 | 3.9423000  | -1.7607000 |
| 40 | N | 1.8758000  | 0.0638000  | -0.2894000 |
| 41 | S | 3.4060000  | 0.6279000  | 0.2813000  |
| 42 | O | 3.9822000  | 1.3909000  | -0.8151000 |
| 43 | O | 3.2424000  | 1.2895000  | 1.5729000  |
| 44 | C | 4.3320000  | -0.8599000 | 0.5107000  |
| 45 | H | 4.3972000  | -1.3849000 | -0.4381000 |
| 46 | H | 5.3159000  | -0.5233000 | 0.8422000  |
| 47 | H | 3.8679000  | -1.4753000 | 1.2777000  |

*trans-*  
product

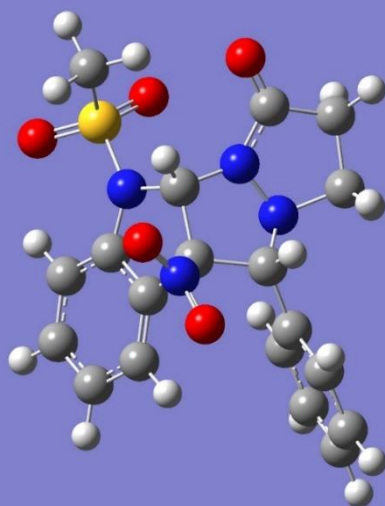

|    |   | X          | Y          | Z          |
|----|---|------------|------------|------------|
| 1  | O | 0.2615000  | 0.3036000  | 3.2568000  |
| 2  | O | 2.6346000  | -2.9961000 | 0.4304000  |
| 3  | N | -0.3858000 | -1.5889000 | -0.6788000 |
| 4  | N | 0.8864000  | -1.5969000 | -0.0451000 |
| 5  | N | -0.6681000 | 0.1749000  | 2.4904000  |
| 6  | O | -1.8381000 | 0.1895000  | 2.8034000  |
| 7  | C | -0.3740000 | 0.0586000  | 1.0008000  |
| 8  | C | -2.6093000 | -0.6583000 | -0.2037000 |
| 9  | C | -0.4259000 | 1.4359000  | 0.4140000  |
| 10 | C | -1.2740000 | -1.0538000 | 0.3657000  |
| 11 | H | -1.4266000 | -1.8139000 | 1.1452000  |
| 12 | C | 1.0818000  | -0.4271000 | 0.7407000  |

|    |   |            |            |            |
|----|---|------------|------------|------------|
| 13 | H | 1.6278000  | -0.6760000 | 1.6484000  |
| 14 | C | 0.8050000  | 1.7559000  | -0.1622000 |
| 15 | C | -1.4835000 | 2.3308000  | 0.4031000  |
| 16 | H | -2.4254000 | 2.0759000  | 0.8730000  |
| 17 | C | -1.3117000 | 3.5622000  | -0.2192000 |
| 18 | C | -3.7739000 | -0.9378000 | 0.5104000  |
| 19 | H | -3.7050000 | -1.4260000 | 1.4758000  |
| 20 | C | -0.0943000 | 3.8657000  | -0.8211000 |
| 21 | H | 0.0347000  | 4.8220000  | -1.3154000 |
| 22 | C | 0.9780000  | 2.9783000  | -0.8049000 |
| 23 | H | 1.9162000  | 3.2424000  | -1.2668000 |
| 24 | C | 1.5641000  | -2.7674000 | -0.1068000 |
| 25 | C | -2.7088000 | -0.0493000 | -1.4558000 |
| 26 | H | -1.8109000 | 0.1538000  | -2.0266000 |
| 27 | C | -0.6348000 | -3.0128000 | -1.0150000 |
| 28 | H | -1.1463000 | -3.0817000 | -1.9726000 |
| 29 | H | -1.2621000 | -3.4703000 | -0.2425000 |
| 30 | C | 0.7492000  | -3.6565000 | -1.0167000 |
| 31 | H | 0.7499000  | -4.6860000 | -0.6635000 |
| 32 | H | 1.2140000  | -3.6316000 | -2.0066000 |
| 33 | C | -3.9534000 | 0.2858000  | -1.9759000 |
| 34 | H | -4.0190000 | 0.7564000  | -2.9506000 |
| 35 | C | -5.0182000 | -0.5972000 | -0.0074000 |
| 36 | H | -5.9158000 | -0.8202000 | 0.5584000  |
| 37 | C | -5.1105000 | 0.0175000  | -1.2517000 |
| 38 | H | -6.0808000 | 0.2792000  | -1.6591000 |
| 39 | H | -2.1246000 | 4.2775000  | -0.2391000 |
| 40 | N | 1.7197000  | 0.7100000  | 0.0521000  |
| 41 | S | 3.2729000  | 0.5994000  | -0.5914000 |
| 42 | O | 3.2766000  | -0.3250000 | -1.7146000 |
| 43 | O | 3.7168000  | 1.9653000  | -0.8267000 |
| 44 | C | 4.1904000  | -0.1078000 | 0.7449000  |
| 45 | H | 3.8448000  | -1.1279000 | 0.9174000  |
| 46 | H | 5.2277000  | -0.1186000 | 0.4059000  |
| 47 | H | 4.0805000  | 0.5268000  | 1.6229000  |



### III. Single crystal X-ray structure analysis

Table S1 Crystal data and structure refinement for 3aa.

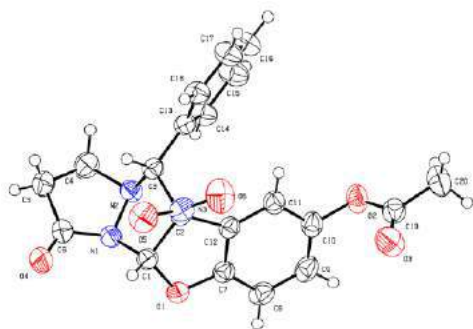

|                                             |                                                               |
|---------------------------------------------|---------------------------------------------------------------|
| CCDC Number                                 | 2076737                                                       |
| Empirical formula                           | C <sub>20</sub> H <sub>17</sub> N <sub>3</sub> O <sub>6</sub> |
| Formula weight                              | 395.36                                                        |
| Temperature/K                               | 293(2)                                                        |
| Crystal system                              | monoclinic                                                    |
| Space group                                 | C2/c                                                          |
| a/Å                                         | 17.08060(10)                                                  |
| b/Å                                         | 12.64680(10)                                                  |
| c/Å                                         | 17.15760(10)                                                  |
| α/°                                         | 90                                                            |
| β/°                                         | 92.4370(10)                                                   |
| γ/°                                         | 90                                                            |
| Volume/Å <sup>3</sup>                       | 3702.95(4)                                                    |
| Z                                           | 8                                                             |
| ρ <sub>calc</sub> /cm <sup>3</sup>          | 1.418                                                         |
| μ/mm <sup>-1</sup>                          | 0.897                                                         |
| F(000)                                      | 1648.0                                                        |
| Crystal size/mm <sup>3</sup>                | 0.602 × 0.348 × 0.26                                          |
| Radiation                                   | Cu Kα (λ = 1.54184)                                           |
| 2θ range for data collection/°              | 8.702 to 152.746                                              |
| Index ranges                                | -21 ≤ h ≤ 21, -10 ≤ k ≤ 15, -21 ≤ l ≤ 21                      |
| Reflections collected                       | 19784                                                         |
| Independent reflections                     | 3883 [R <sub>int</sub> = 0.0124, R <sub>sigma</sub> = 0.0086] |
| Data/restraints/parameters                  | 3883/0/264                                                    |
| Goodness-of-fit on F <sup>2</sup>           | 1.044                                                         |
| Final R indexes [I >= 2σ (I)]               | R <sub>1</sub> = 0.0354, wR <sub>2</sub> = 0.0965             |
| Final R indexes [all data]                  | R <sub>1</sub> = 0.0366, wR <sub>2</sub> = 0.0977             |
| Largest diff. peak/hole / e Å <sup>-3</sup> | 0.25/-0.16                                                    |

#### Crystal structure determination of 3aa

**Crystal Data** for C<sub>20</sub>H<sub>17</sub>N<sub>3</sub>O<sub>6</sub> (*M* = 395.36 g/mol): monoclinic, space group C2/c (no. 15), *a* = 17.08060(10) Å, *b* = 12.64680(10) Å, *c* = 17.15760(10) Å, β = 92.4370(10)°, *V* = 3702.95(4) Å<sup>3</sup>, *Z* = 8, *T* = 293(2) K, μ(Cu Kα) = 0.897 mm<sup>-1</sup>, *D*<sub>calc</sub> = 1.418 g/cm<sup>3</sup>, 19784 reflections measured (8.702° ≤ 2θ ≤ 152.746°), 3883 unique (*R*<sub>int</sub> = 0.0124, *R*<sub>sigma</sub> = 0.0086) which were used in all calculations. The final *R*<sub>1</sub> was 0.0354 (*I* > 2σ(*I*)) and *wR*<sub>2</sub> was 0.0977 (all data). The crystals were grown from MeCN.

**Table S2 Crystal data and structure refinement for 3ac.**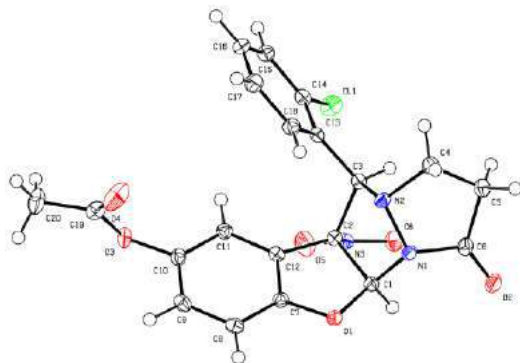

|                                                |                                                                  |
|------------------------------------------------|------------------------------------------------------------------|
| CCDC Number                                    | 2076749                                                          |
| Empirical formula                              | $C_{20}H_{16}ClN_3O_6$                                           |
| Formula weight                                 | 429.81                                                           |
| Temperature/K                                  | 100.00(10)                                                       |
| Crystal system                                 | monoclinic                                                       |
| Space group                                    | I2/a                                                             |
| a/Å                                            | 18.28800(10)                                                     |
| b/Å                                            | 8.88670(10)                                                      |
| c/Å                                            | 24.7898(2)                                                       |
| $\alpha/^\circ$                                | 90                                                               |
| $\beta/^\circ$                                 | 110.7630(10)                                                     |
| $\gamma/^\circ$                                | 90                                                               |
| Volume/Å <sup>3</sup>                          | 3767.18(6)                                                       |
| Z                                              | 8                                                                |
| $\rho_{\text{calc}}/\text{cm}^3$               | 1.516                                                            |
| $\mu/\text{mm}^{-1}$                           | 2.207                                                            |
| F(000)                                         | 1776.0                                                           |
| Crystal size/mm <sup>3</sup>                   | 0.399 × 0.322 × 0.266                                            |
| Radiation                                      | Cu K $\alpha$ ( $\lambda = 1.54184$ )                            |
| 2 $\Theta$ range for data collection/ $^\circ$ | 7.628 to 152.602                                                 |
| Index ranges                                   | -23 ≤ h ≤ 23, -10 ≤ k ≤ 10, -31 ≤ l ≤ 30                         |
| Reflections collected                          | 21644                                                            |
| Independent reflections                        | 3899 [ $R_{\text{int}} = 0.0184$ , $R_{\text{sigma}} = 0.0108$ ] |
| Data/restraints/parameters                     | 3899/0/273                                                       |
| Goodness-of-fit on F <sup>2</sup>              | 1.070                                                            |
| Final R indexes [ $I \geq 2\sigma(I)$ ]        | $R_1 = 0.0288$ , $wR_2 = 0.0739$                                 |
| Final R indexes [all data]                     | $R_1 = 0.0291$ , $wR_2 = 0.0742$                                 |
| Largest diff. peak/hole / e Å <sup>-3</sup>    | 0.34/-0.22                                                       |

**Crystal structure determination of 3ac**

**Crystal Data** for  $C_{20}H_{16}ClN_3O_6$  ( $M = 429.81$  g/mol): monoclinic, space group I2/a (no. 15),  $a = 18.28800(10)$  Å,  $b = 8.88670(10)$  Å,  $c = 24.7898(2)$  Å,  $\beta = 110.7630(10)^\circ$ ,  $V = 3767.18(6)$  Å<sup>3</sup>,  $Z = 8$ ,  $T = 100.00(10)$  K,  $\mu(\text{Cu K}\alpha) = 2.207$  mm<sup>-1</sup>,  $D_{\text{calc}} = 1.516$  g/cm<sup>3</sup>, 21644 reflections measured ( $7.628^\circ \leq 2\Theta \leq 152.602^\circ$ ), 3899 unique ( $R_{\text{int}} = 0.0184$ ,  $R_{\text{sigma}} = 0.0108$ ) which were used in all calculations. The final  $R_1$  was 0.0288 ( $I > 2\sigma(I)$ ) and  $wR_2$  was 0.0742 (all data). The crystals were grown from MeCN.

**Table S3 Crystal data and structure refinement for 3ac'.**

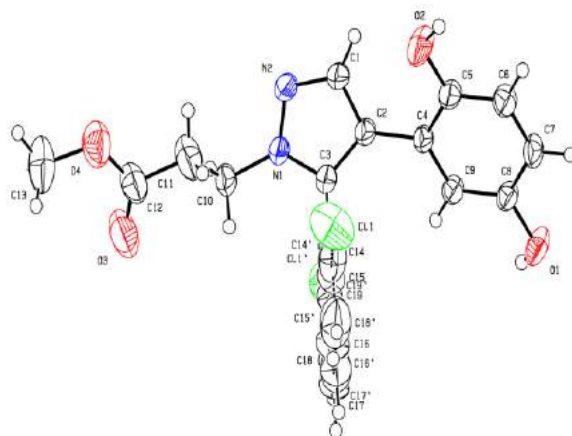

|                                               |                                                               |
|-----------------------------------------------|---------------------------------------------------------------|
| CCDC Number                                   | 2083589                                                       |
| Empirical formula                             | $C_{19}H_{17}ClN_2O_4$                                        |
| Formula weight                                | 372.79                                                        |
| Temperature/K                                 | 293(2)                                                        |
| Crystal system                                | monoclinic                                                    |
| Space group                                   | $P2_1/n$                                                      |
| $a/\text{\AA}$                                | 8.63400(10)                                                   |
| $b/\text{\AA}$                                | 13.47330(10)                                                  |
| $c/\text{\AA}$                                | 15.5128(2)                                                    |
| $\alpha/^\circ$                               | 90                                                            |
| $\beta/^\circ$                                | 92.0160(10)                                                   |
| $\gamma/^\circ$                               | 90                                                            |
| Volume/ $\text{\AA}^3$                        | 1803.46(3)                                                    |
| Z                                             | 4                                                             |
| $\rho_{\text{calc}}/\text{g/cm}^3$            | 1.373                                                         |
| $\mu/\text{mm}^{-1}$                          | 2.112                                                         |
| F(000)                                        | 776.0                                                         |
| Crystal size/ $\text{mm}^3$                   | $0.33 \times 0.202 \times 0.157$                              |
| Radiation                                     | Cu $K\alpha$ ( $\lambda = 1.54184$ )                          |
| $2\theta$ range for data collection/ $^\circ$ | 8.696 to 152.984                                              |
| Index ranges                                  | $-10 \leq h \leq 10, -12 \leq k \leq 16, -19 \leq l \leq 17$  |
| Reflections collected                         | 20601                                                         |
| Independent reflections                       | 3783 [ $R_{\text{int}} = 0.0214, R_{\text{sigma}} = 0.0139$ ] |
| Data/restraints/parameters                    | 3783/72/303                                                   |
| Goodness-of-fit on $F^2$                      | 1.174                                                         |
| Final R indexes [ $I \geq 2\sigma(I)$ ]       | $R_1 = 0.0707, wR_2 = 0.1605$                                 |
| Final R indexes [all data]                    | $R_1 = 0.0722, wR_2 = 0.1612$                                 |
| Largest diff. peak/hole / $e \text{\AA}^{-3}$ | 0.24/-0.28                                                    |

**Crystal structure determination of 3ac'**

**Crystal Data** for  $C_{19}H_{17}ClN_2O_4$  ( $M = 372.79$  g/mol): monoclinic, space group  $P2_1/n$  (no. 14),  $a = 8.63400(10)$   $\text{\AA}$ ,  $b = 13.47330(10)$   $\text{\AA}$ ,  $c = 15.5128(2)$   $\text{\AA}$ ,  $\beta = 92.0160(10)^\circ$ ,  $V = 1803.46(3)$   $\text{\AA}^3$ ,  $Z = 4$ ,  $T = 293(2)$  K,  $\mu(\text{Cu } K\alpha) = 2.112$   $\text{mm}^{-1}$ ,  $D_{\text{calc}} = 1.373$   $\text{g/cm}^3$ , 20601 reflections measured ( $8.696^\circ \leq 2\theta \leq 152.984^\circ$ ), 3783 unique ( $R_{\text{int}} = 0.0214, R_{\text{sigma}} = 0.0139$ ) which were used in all calculations. The final  $R_1$  was 0.0707 ( $I > 2\sigma(I)$ ) and  $wR_2$  was 0.1612 (all data).

**Table S4 Crystal data and structure refinement for 3ah.**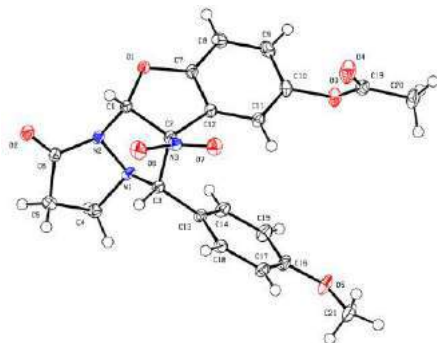

|                                             |                                                               |
|---------------------------------------------|---------------------------------------------------------------|
| CCDC Number                                 | 2076734                                                       |
| Empirical formula                           | C <sub>21</sub> H <sub>19</sub> N <sub>3</sub> O <sub>7</sub> |
| Formula weight                              | 425.39                                                        |
| Temperature/K                               | 100.00(10)                                                    |
| Crystal system                              | monoclinic                                                    |
| Space group                                 | P2 <sub>1</sub> /c                                            |
| a/Å                                         | 14.40077(10)                                                  |
| b/Å                                         | 16.91016(12)                                                  |
| c/Å                                         | 8.11294(5)                                                    |
| α/°                                         | 90                                                            |
| β/°                                         | 91.4865(6)                                                    |
| γ/°                                         | 90                                                            |
| Volume/Å <sup>3</sup>                       | 1974.99(2)                                                    |
| Z                                           | 4                                                             |
| ρ <sub>calc</sub> /cm <sup>3</sup>          | 1.431                                                         |
| μ/mm <sup>-1</sup>                          | 0.921                                                         |
| F(000)                                      | 888.0                                                         |
| Crystal size/mm <sup>3</sup>                | 0.468 × 0.401 × 0.05                                          |
| Radiation                                   | Cu Kα (λ = 1.54184)                                           |
| 2θ range for data collection/°              | 6.14 to 152.836                                               |
| Index ranges                                | -18 ≤ h ≤ 17, -21 ≤ k ≤ 21, -10 ≤ l ≤ 7                       |
| Reflections collected                       | 21205                                                         |
| Independent reflections                     | 4136 [R <sub>int</sub> = 0.0375, R <sub>sigma</sub> = 0.0256] |
| Data/restraints/parameters                  | 4136/0/283                                                    |
| Goodness-of-fit on F <sup>2</sup>           | 1.049                                                         |
| Final R indexes [I ≥ 2σ (I)]                | R <sub>1</sub> = 0.0358, wR <sub>2</sub> = 0.0946             |
| Final R indexes [all data]                  | R <sub>1</sub> = 0.0375, wR <sub>2</sub> = 0.0964             |
| Largest diff. peak/hole / e Å <sup>-3</sup> | 0.33/-0.26                                                    |

**Crystal structure determination of 3ah**

**Crystal Data** for C<sub>21</sub>H<sub>19</sub>N<sub>3</sub>O<sub>7</sub> (*M* = 425.39 g/mol): monoclinic, space group P2<sub>1</sub>/c (no. 14), *a* = 14.40077(10) Å, *b* = 16.91016(12) Å, *c* = 8.11294(5) Å, β = 91.4865(6)°, *V* = 1974.99(2) Å<sup>3</sup>, *Z* = 4, *T* = 100.00(10) K, μ(Cu Kα) = 0.921 mm<sup>-1</sup>, *D*<sub>calc</sub> = 1.431 g/cm<sup>3</sup>, 21205 reflections measured (6.14° ≤ 2θ ≤ 152.836°), 4136 unique (*R*<sub>int</sub> = 0.0375, *R*<sub>sigma</sub> = 0.0256) which were used in all calculations. The final *R*<sub>1</sub> was 0.0358 (*I* > 2σ(*I*)) and *wR*<sub>2</sub> was 0.0964 (all data). The crystals were grown from a mixture CCl<sub>4</sub>/CHCl<sub>3</sub>.

**Table S5 Crystal data and structure refinement for 5bc.**

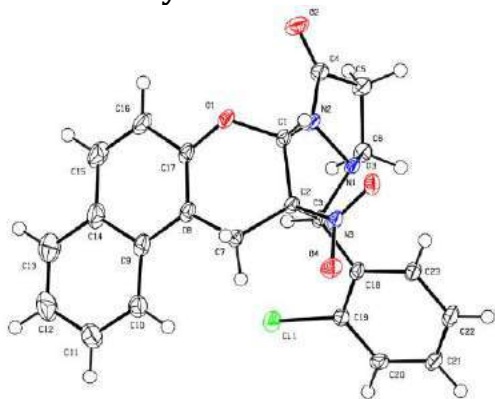

|                                             |                                                                 |
|---------------------------------------------|-----------------------------------------------------------------|
| CCDC Number                                 | 2077063                                                         |
| Empirical formula                           | C <sub>23</sub> H <sub>18</sub> ClN <sub>3</sub> O <sub>4</sub> |
| Formula weight                              | 435.85                                                          |
| Temperature/K                               | 100.00(10)                                                      |
| Crystal system                              | triclinic                                                       |
| Space group                                 | P-1                                                             |
| a/Å                                         | 7.5805(2)                                                       |
| b/Å                                         | 8.9682(3)                                                       |
| c/Å                                         | 15.1658(5)                                                      |
| α/°                                         | 92.886(3)                                                       |
| β/°                                         | 97.851(3)                                                       |
| γ/°                                         | 102.333(3)                                                      |
| Volume/Å <sup>3</sup>                       | 994.41(6)                                                       |
| Z                                           | 2                                                               |
| ρ <sub>calc</sub> /cm <sup>3</sup>          | 1.456                                                           |
| μ/mm <sup>-1</sup>                          | 2.022                                                           |
| F(000)                                      | 452.0                                                           |
| Crystal size/mm <sup>3</sup>                | 0.579 × 0.421 × 0.381                                           |
| Radiation                                   | Cu Kα (λ = 1.54184)                                             |
| 2θ range for data collection/°              | 5.902 to 153.186                                                |
| Index ranges                                | -9 ≤ h ≤ 9, -11 ≤ k ≤ 11, -18 ≤ l ≤ 19                          |
| Reflections collected                       | 7849                                                            |
| Independent reflections                     | 7849 [R <sub>sigma</sub> = 0.0090]                              |
| Data/restraints/parameters                  | 7849/0/281                                                      |
| Goodness-of-fit on F <sup>2</sup>           | 1.069                                                           |
| Final R indexes [I >= 2σ (I)]               | R <sub>1</sub> = 0.0759, wR <sub>2</sub> = 0.2129               |
| Final R indexes [all data]                  | R <sub>1</sub> = 0.0762, wR <sub>2</sub> = 0.2134               |
| Largest diff. peak/hole / e Å <sup>-3</sup> | 0.45/-0.80                                                      |

#### Crystal structure determination of 5bc

**Crystal Data** for C<sub>23</sub>H<sub>18</sub>ClN<sub>3</sub>O<sub>4</sub> (*M* = 435.85 g/mol): triclinic, space group P-1 (no. 2), *a* = 7.5805(2) Å, *b* = 8.9682(3) Å, *c* = 15.1658(5) Å, α = 92.886(3)°, β = 97.851(3)°, γ = 102.333(3)°, *V* = 994.41(6) Å<sup>3</sup>, *Z* = 2, *T* = 100.00(10) K, μ(Cu Kα) = 2.022 mm<sup>-1</sup>, *D*<sub>calc</sub> = 1.456 g/cm<sup>3</sup>, 7849 reflections measured (5.902° ≤ 2θ ≤ 153.186°), 7849 unique (*R*<sub>int</sub> = ?, *R*<sub>sigma</sub> = 0.0090) which were used in all calculations. The final *R*<sub>1</sub> was 0.0759 (*I* > 2σ(*I*)) and *wR*<sub>2</sub> was 0.2134 (all data). Twinned data refinement Scales: 0.3908 0.6092. The crystals were grown from MeCN.

**Table S6 Crystal data and structure refinement for 5cf.**

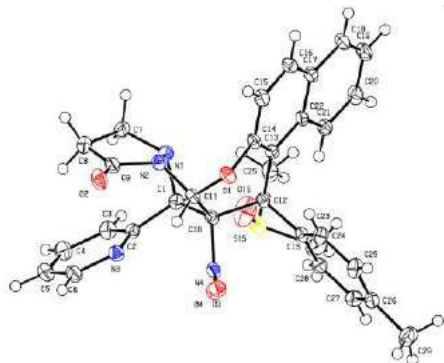

|                                             |                                                                 |
|---------------------------------------------|-----------------------------------------------------------------|
| CCDC Number                                 | 2076671                                                         |
| Empirical formula                           | C <sub>31</sub> H <sub>30</sub> N <sub>4</sub> O <sub>5</sub> S |
| Formula weight                              | 570.65                                                          |
| Temperature/K                               | 100.00(10)                                                      |
| Crystal system                              | monoclinic                                                      |
| Space group                                 | Cc                                                              |
| a/Å                                         | 11.55130(10)                                                    |
| b/Å                                         | 17.20680(10)                                                    |
| c/Å                                         | 14.50100(10)                                                    |
| α/°                                         | 90                                                              |
| β/°                                         | 106.9860(10)                                                    |
| γ/°                                         | 90                                                              |
| Volume/Å <sup>3</sup>                       | 2756.50(4)                                                      |
| Z                                           | 4                                                               |
| ρ <sub>calc</sub> /g/cm <sup>3</sup>        | 1.375                                                           |
| μ/mm <sup>-1</sup>                          | 1.449                                                           |
| F(000)                                      | 1200.0                                                          |
| Crystal size/mm <sup>3</sup>                | 0.359 × 0.303 × 0.178                                           |
| Radiation                                   | Cu Kα (λ = 1.54184)                                             |
| 2θ range for data collection/°              | 9.514 to 153.02                                                 |
| Index ranges                                | -14 ≤ h ≤ 14, -21 ≤ k ≤ 21, -16 ≤ l ≤ 18                        |
| Reflections collected                       | 28113                                                           |
| Independent reflections                     | 4672 [R <sub>int</sub> = 0.0276, R <sub>sigma</sub> = 0.0196]   |
| Data/restraints/parameters                  | 4672/2/373                                                      |
| Goodness-of-fit on F <sup>2</sup>           | 1.050                                                           |
| Final R indexes [I>=2σ (I)]                 | R <sub>1</sub> = 0.0281, wR <sub>2</sub> = 0.0745               |
| Final R indexes [all data]                  | R <sub>1</sub> = 0.0282, wR <sub>2</sub> = 0.0746               |
| Largest diff. peak/hole / e Å <sup>-3</sup> | 0.35/-0.37                                                      |
| Flack parameter                             | 0.002(8)                                                        |

**Crystal structure determination of 5cf**

**Crystal Data** for C<sub>31</sub>H<sub>30</sub>N<sub>4</sub>O<sub>5</sub>S (M = 570.65 g/mol): monoclinic, space group Cc (no. 9), a = 11.55130(10) Å, b = 17.20680(10) Å, c = 14.50100(10) Å, β = 106.9860(10)°, V = 2756.50(4) Å<sup>3</sup>, Z = 4, T = 100.00(10) K, μ(Cu Kα) = 1.449 mm<sup>-1</sup>, D<sub>calc</sub> = 1.375 g/cm<sup>3</sup>, 28113 reflections measured (9.514° ≤ 2θ ≤ 153.02°), 4672 unique (R<sub>int</sub> = 0.0276, R<sub>sigma</sub> = 0.0196) which were used in all calculations. The final R<sub>1</sub> was 0.0281 (I > 2σ(I)) and wR<sub>2</sub> was 0.0746 (all data). The crystals were grown from DMSO.

**Table S7 Crystal data and structure refinement for 5bj.**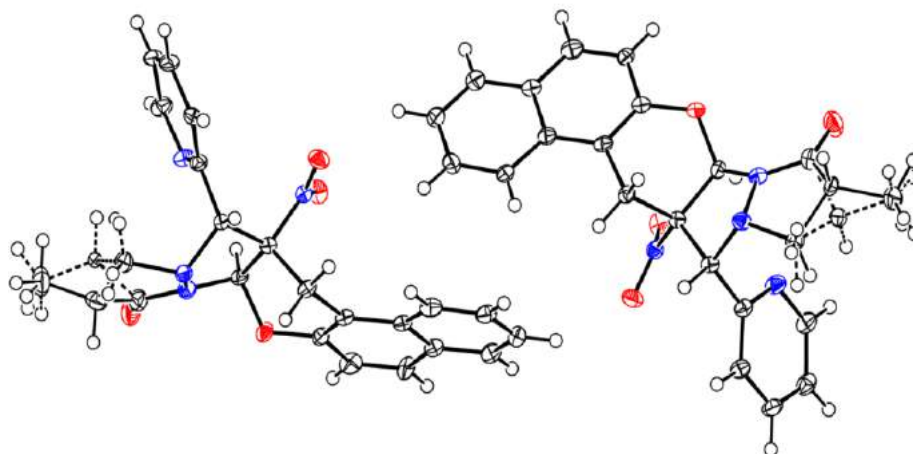

|                                             |                                                               |
|---------------------------------------------|---------------------------------------------------------------|
| CCDC Number                                 | 2083590                                                       |
| Empirical formula                           | C <sub>23</sub> H <sub>20</sub> N <sub>4</sub> O <sub>4</sub> |
| Formula weight                              | 416.43                                                        |
| Temperature/K                               | 99.99(10)                                                     |
| Crystal system                              | orthorhombic                                                  |
| Space group                                 | Pna2 <sub>1</sub>                                             |
| a/Å                                         | 16.82982(8)                                                   |
| b/Å                                         | 5.65071(4)                                                    |
| c/Å                                         | 41.3175(2)                                                    |
| α/°                                         | 90                                                            |
| β/°                                         | 90                                                            |
| γ/°                                         | 90                                                            |
| Volume/Å <sup>3</sup>                       | 3929.32(4)                                                    |
| Z                                           | 8                                                             |
| ρ <sub>calc</sub> /g/cm <sup>3</sup>        | 1.408                                                         |
| μ/mm <sup>-1</sup>                          | 0.812                                                         |
| F(000)                                      | 1744.0                                                        |
| Crystal size/mm <sup>3</sup>                | 0.466 × 0.217 × 0.04                                          |
| Radiation                                   | Cu Kα (λ = 1.54184)                                           |
| 2θ range for data collection/°              | 4.278 to 153.184                                              |
| Index ranges                                | -21 ≤ h ≤ 21, -6 ≤ k ≤ 7, -52 ≤ l ≤ 52                        |
| Reflections collected                       | 140500                                                        |
| Independent reflections                     | 8234 [R <sub>int</sub> = 0.0558, R <sub>sigma</sub> = 0.0166] |
| Data/restraints/parameters                  | 8234/13/581                                                   |
| Goodness-of-fit on F <sup>2</sup>           | 1.080                                                         |
| Final R indexes [I ≥ 2σ (I)]                | R <sub>1</sub> = 0.0469, wR <sub>2</sub> = 0.1234             |
| Final R indexes [all data]                  | R <sub>1</sub> = 0.0472, wR <sub>2</sub> = 0.1236             |
| Largest diff. peak/hole / e Å <sup>-3</sup> | 0.31/-0.27                                                    |
| Flack parameter                             | 0.64(8)                                                       |

**Crystal structure determination of 5bj**

**Crystal Data** for C<sub>23</sub>H<sub>20</sub>N<sub>4</sub>O<sub>4</sub> (*M* = 416.43 g/mol): orthorhombic, space group Pna2<sub>1</sub> (no. 33), *a* = 16.82982(8) Å, *b* = 5.65071(4) Å, *c* = 41.3175(2) Å, *V* = 3929.32(4) Å<sup>3</sup>, *Z* = 8, *T* = 99.99(10) K, μ(Cu Kα) = 0.812 mm<sup>-1</sup>, *D*<sub>calc</sub> = 1.408 g/cm<sup>3</sup>, 140500 reflections measured (4.278° ≤ 2θ ≤ 153.184°), 8234 unique (*R*<sub>int</sub> = 0.0558, *R*<sub>sigma</sub> = 0.0166) which were used in all calculations. The final *R*<sub>1</sub> was 0.0469 (*I* > 2σ(*I*)) and *wR*<sub>2</sub> was 0.1236 (all data).

**Table S8 Crystal data and structure refinement for 5bd'**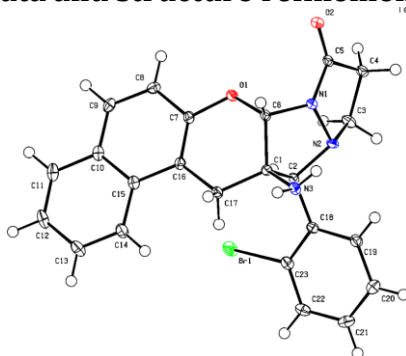

|                                               |                                                               |
|-----------------------------------------------|---------------------------------------------------------------|
| CCDC Number                                   | 2117341                                                       |
| Empirical formula                             | $C_{23}H_{20}BrN_3O_2$                                        |
| Formula weight                                | 450.34                                                        |
| Temperature/K                                 | 100.00(10)                                                    |
| Crystal system                                | monoclinic                                                    |
| Space group                                   | $I 1 2/a 1$                                                   |
| $a/\text{\AA}$                                | 22.22011(17)                                                  |
| $b/\text{\AA}$                                | 7.84209(3)                                                    |
| $c/\text{\AA}$                                | 24.48716(18)                                                  |
| $\alpha/^\circ$                               | 90                                                            |
| $\beta/^\circ$                                | 116.6327(9)                                                   |
| $\gamma/^\circ$                               | 90                                                            |
| Volume/ $\text{\AA}^3$                        | 3814.21                                                       |
| Z                                             | 8                                                             |
| $\rho_{\text{calc}}/\text{g/cm}^3$            | 1.568                                                         |
| $\mu/\text{mm}^{-1}$                          | 3.148                                                         |
| F(000)                                        | 1840.0                                                        |
| Crystal size/ $\text{mm}^3$                   | $0.483 \times 0.208 \times 0.121$                             |
| Radiation                                     | Cu $K\alpha$ ( $\lambda = 1.54184$ )                          |
| $2\Theta$ range for data collection/ $^\circ$ | 4.039 to 76.086                                               |
| Index ranges                                  | $-27 \leq h \leq 23, -9 \leq k \leq 7, -30 \leq l \leq 30$    |
| Reflections collected                         | 20647                                                         |
| Independent reflections                       | 3971 [ $R_{\text{int}} = 0.0226, R_{\text{sigma}} = 0.0157$ ] |
| Data/restraints/parameters                    | 3971/0/271                                                    |
| Goodness-of-fit on $F^2$                      | 1.096                                                         |
| Final R indexes [ $I \geq 2\sigma(I)$ ]       | $R_1 = 0.093, wR_2 = 0.0655$                                  |
| Final R indexes [all data]                    | $R_1 = 0.0254, wR_2 = 0.0657$                                 |
| Largest diff. peak/hole / $e \text{\AA}^{-3}$ | 0.41/-0.47                                                    |

**Crystal structure determination of 5bd'**

**Crystal Data**  $C_{23}H_{20}BrN_3O_2$  ( $M = 450.34$  g/mol): monoclinic, space group  $I 1 2/a 1$ ,  $a = 22.22011(17)$   $\text{\AA}$ ,  $b = 7.84209(3)$   $\text{\AA}$ ,  $c = 24.48716(18)$   $\text{\AA}$ ,  $\alpha = 90^\circ$ ,  $\beta = 116.6327(9)^\circ$ ,  $\gamma = 90^\circ$ ,  $V = 3814.21$   $\text{\AA}^3$ ,  $Z = 8$ ,  $T = 100.00(10)$  K,  $\mu(\text{Cu } K\alpha) = 2.022$   $\text{mm}^{-1}$ ,  $D_{\text{calc}} = 1.568$   $\text{g/cm}^3$ , 20647 reflections measured ( $4.039^\circ \leq 2\Theta \leq 76.086^\circ$ ), 3971 unique ( $R_{\text{int}} = 0.0226, R_{\text{sigma}} = 0.0157$ ) which were used in all calculations. The final  $R_1$  was 0.093 ( $I > 2\sigma(I)$ ) and  $wR_2$  was 0.0657 (all data).



# IV. Copies of NMR spectra

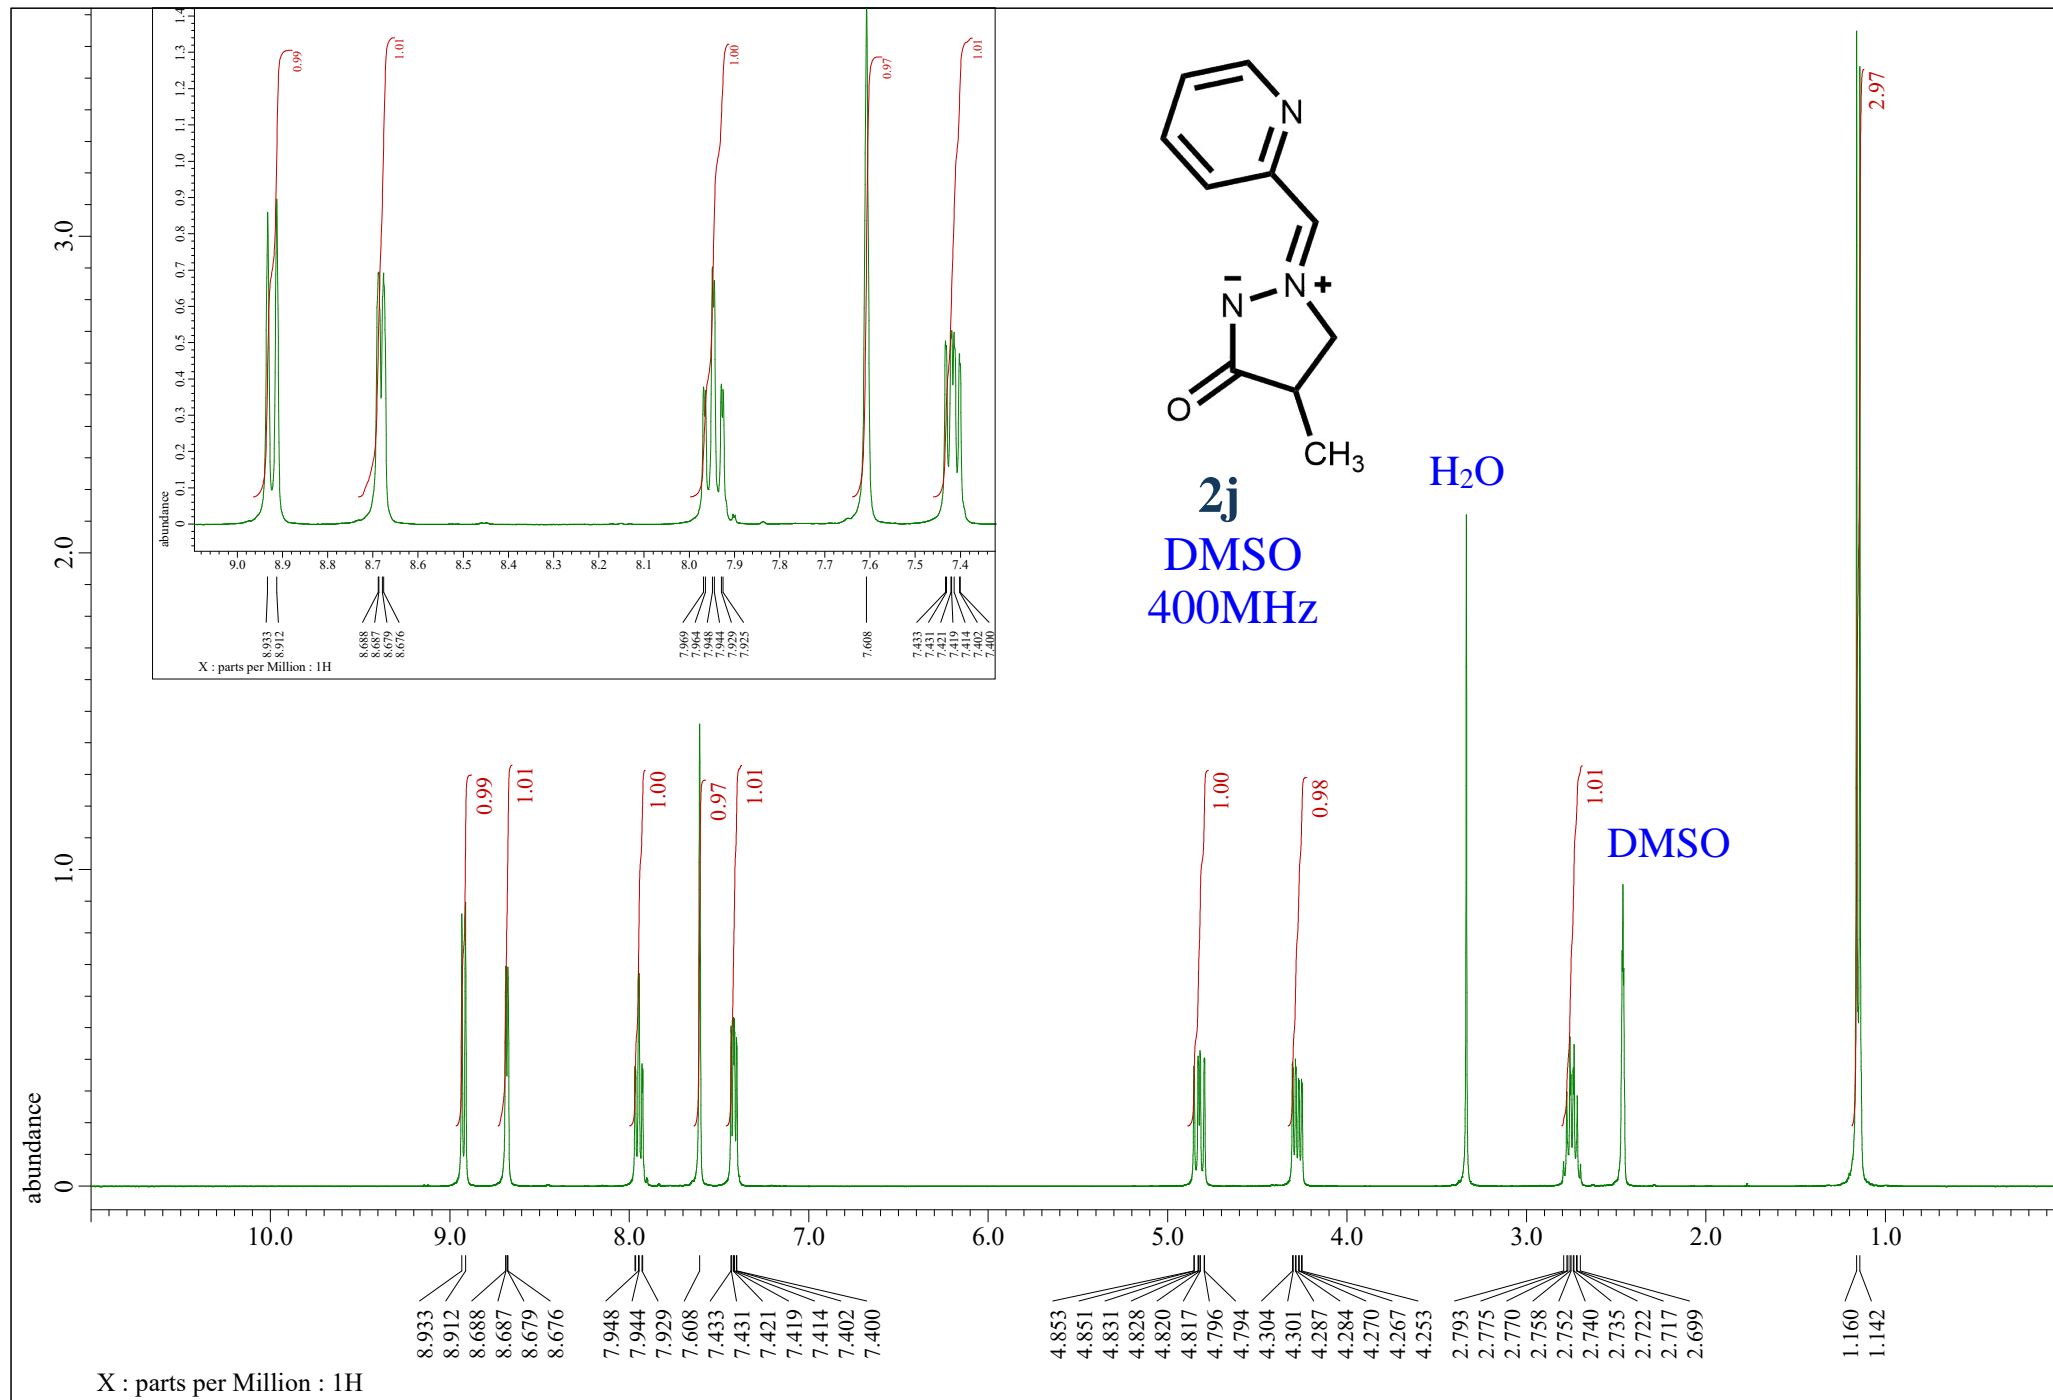

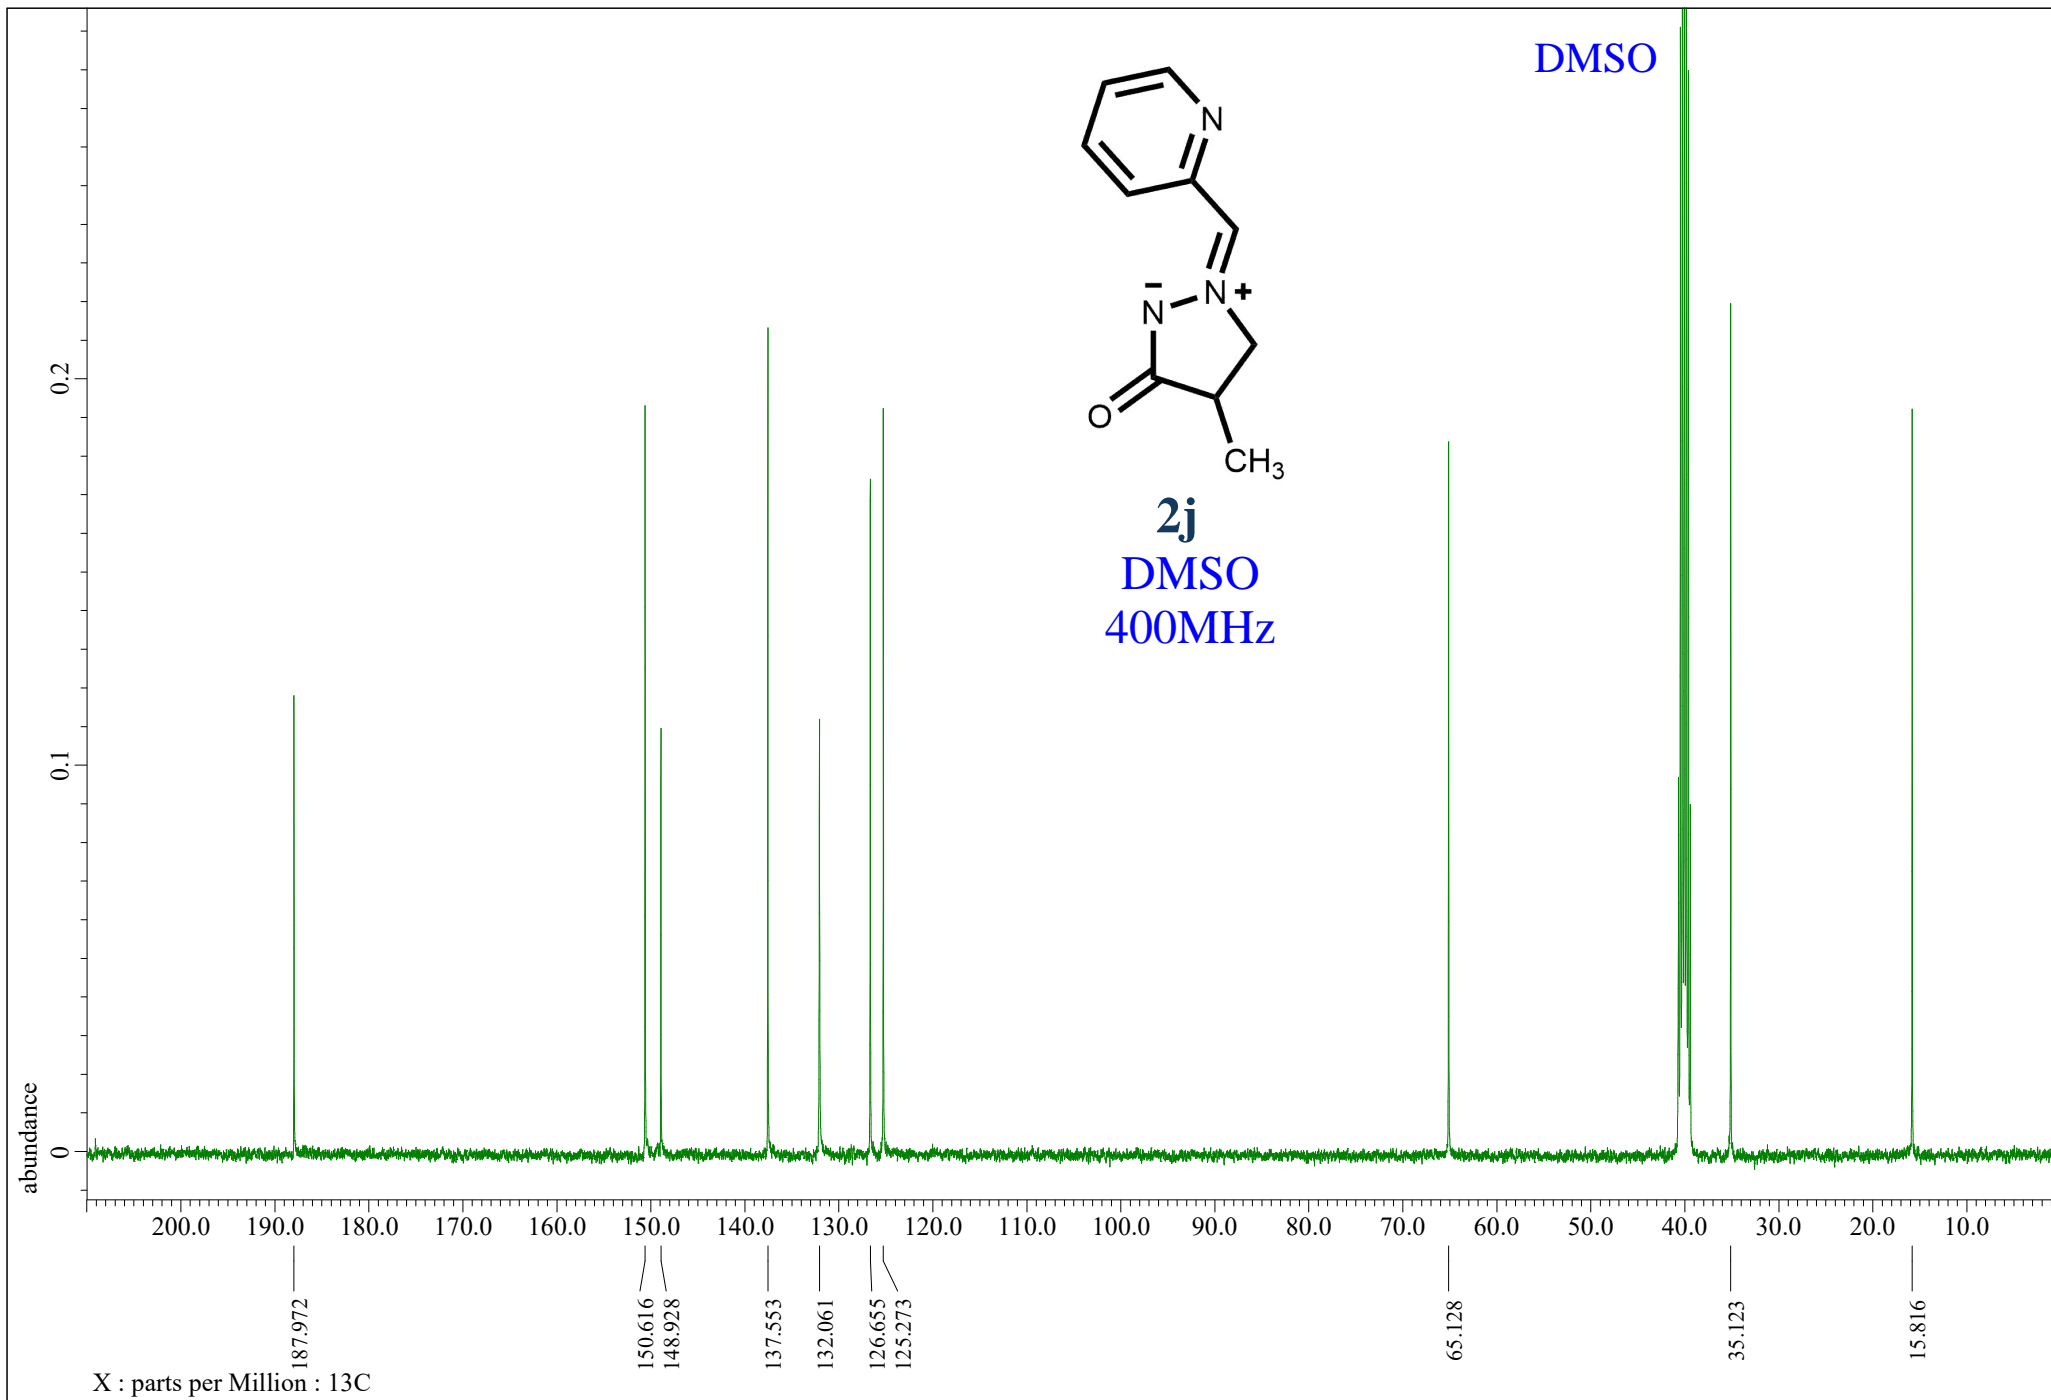

# VT <sup>1</sup>H NMR

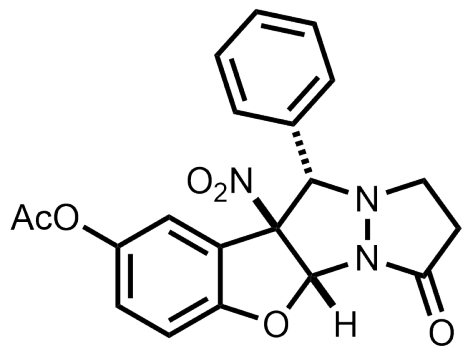

**3aa**  
**CDCl<sub>3</sub>**  
**400MHz**

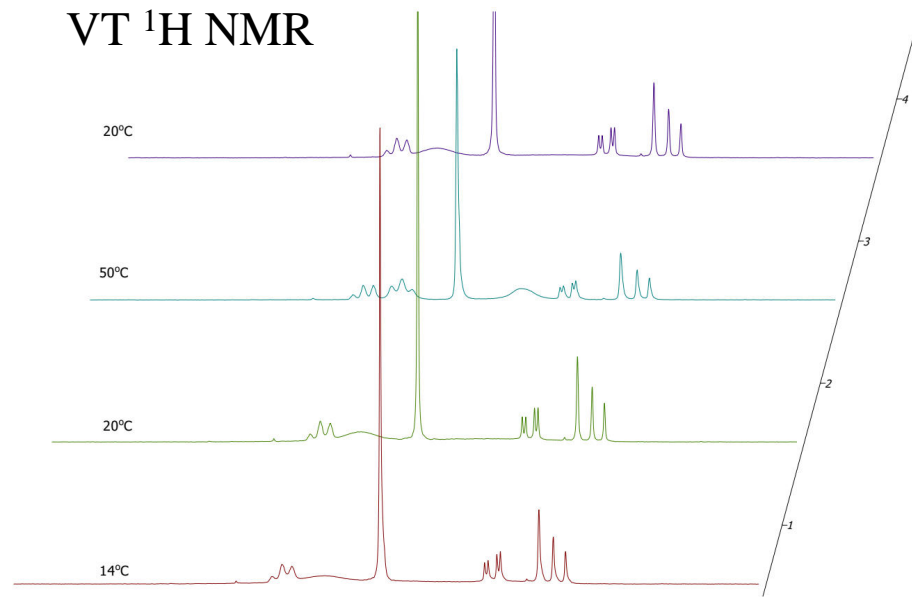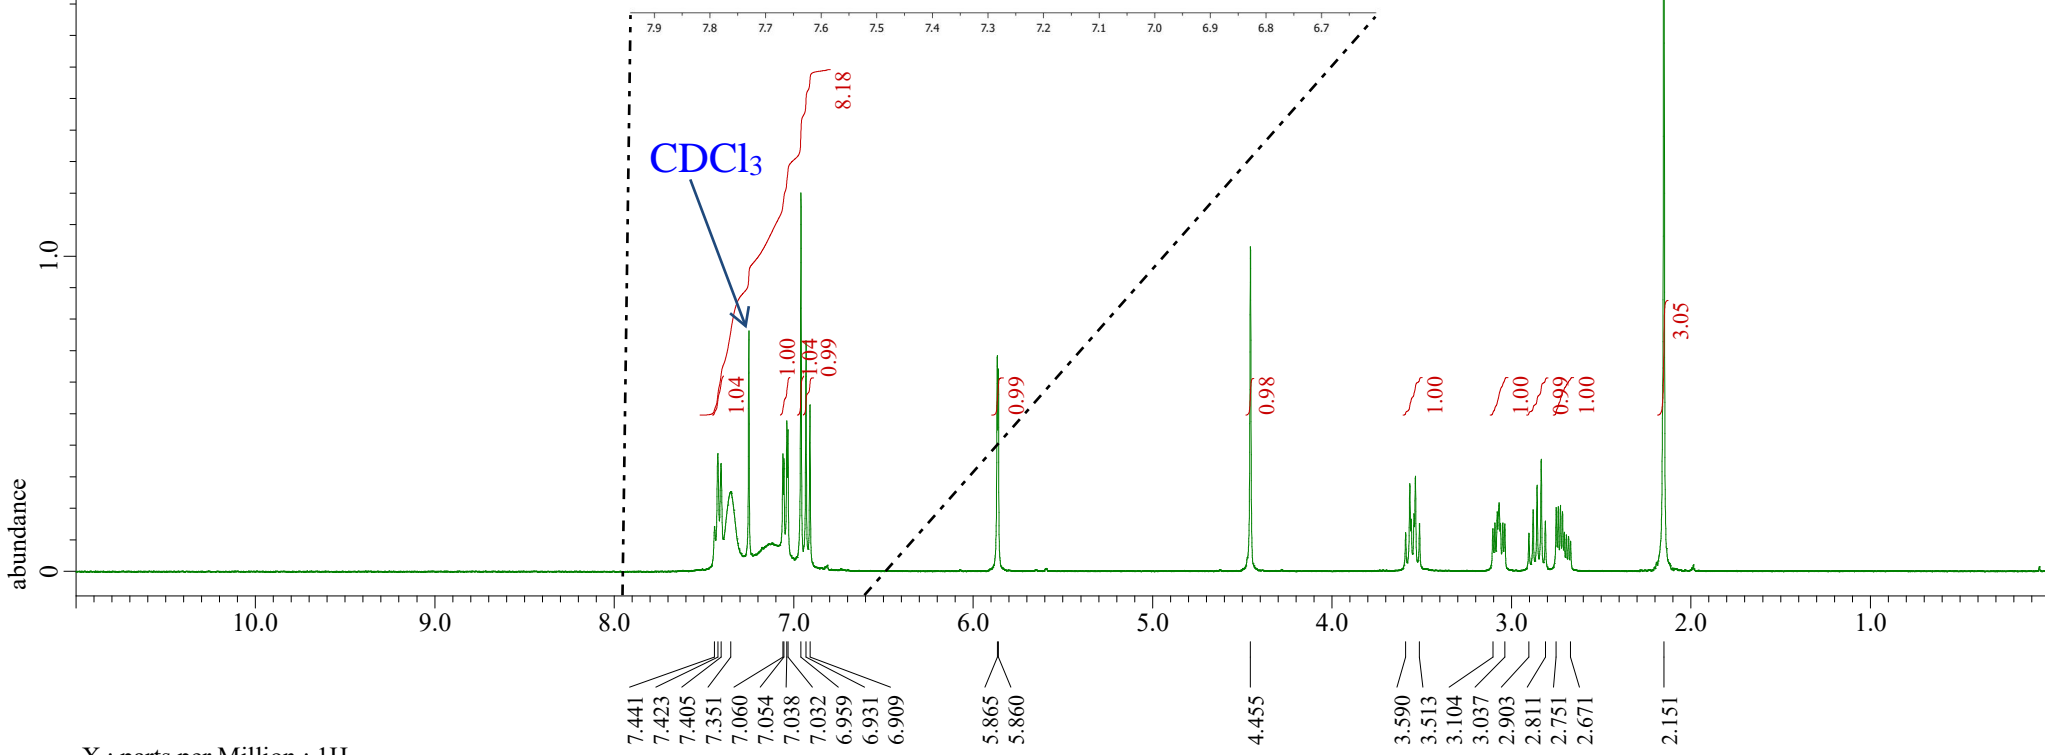

X : parts per Million : <sup>1</sup>H

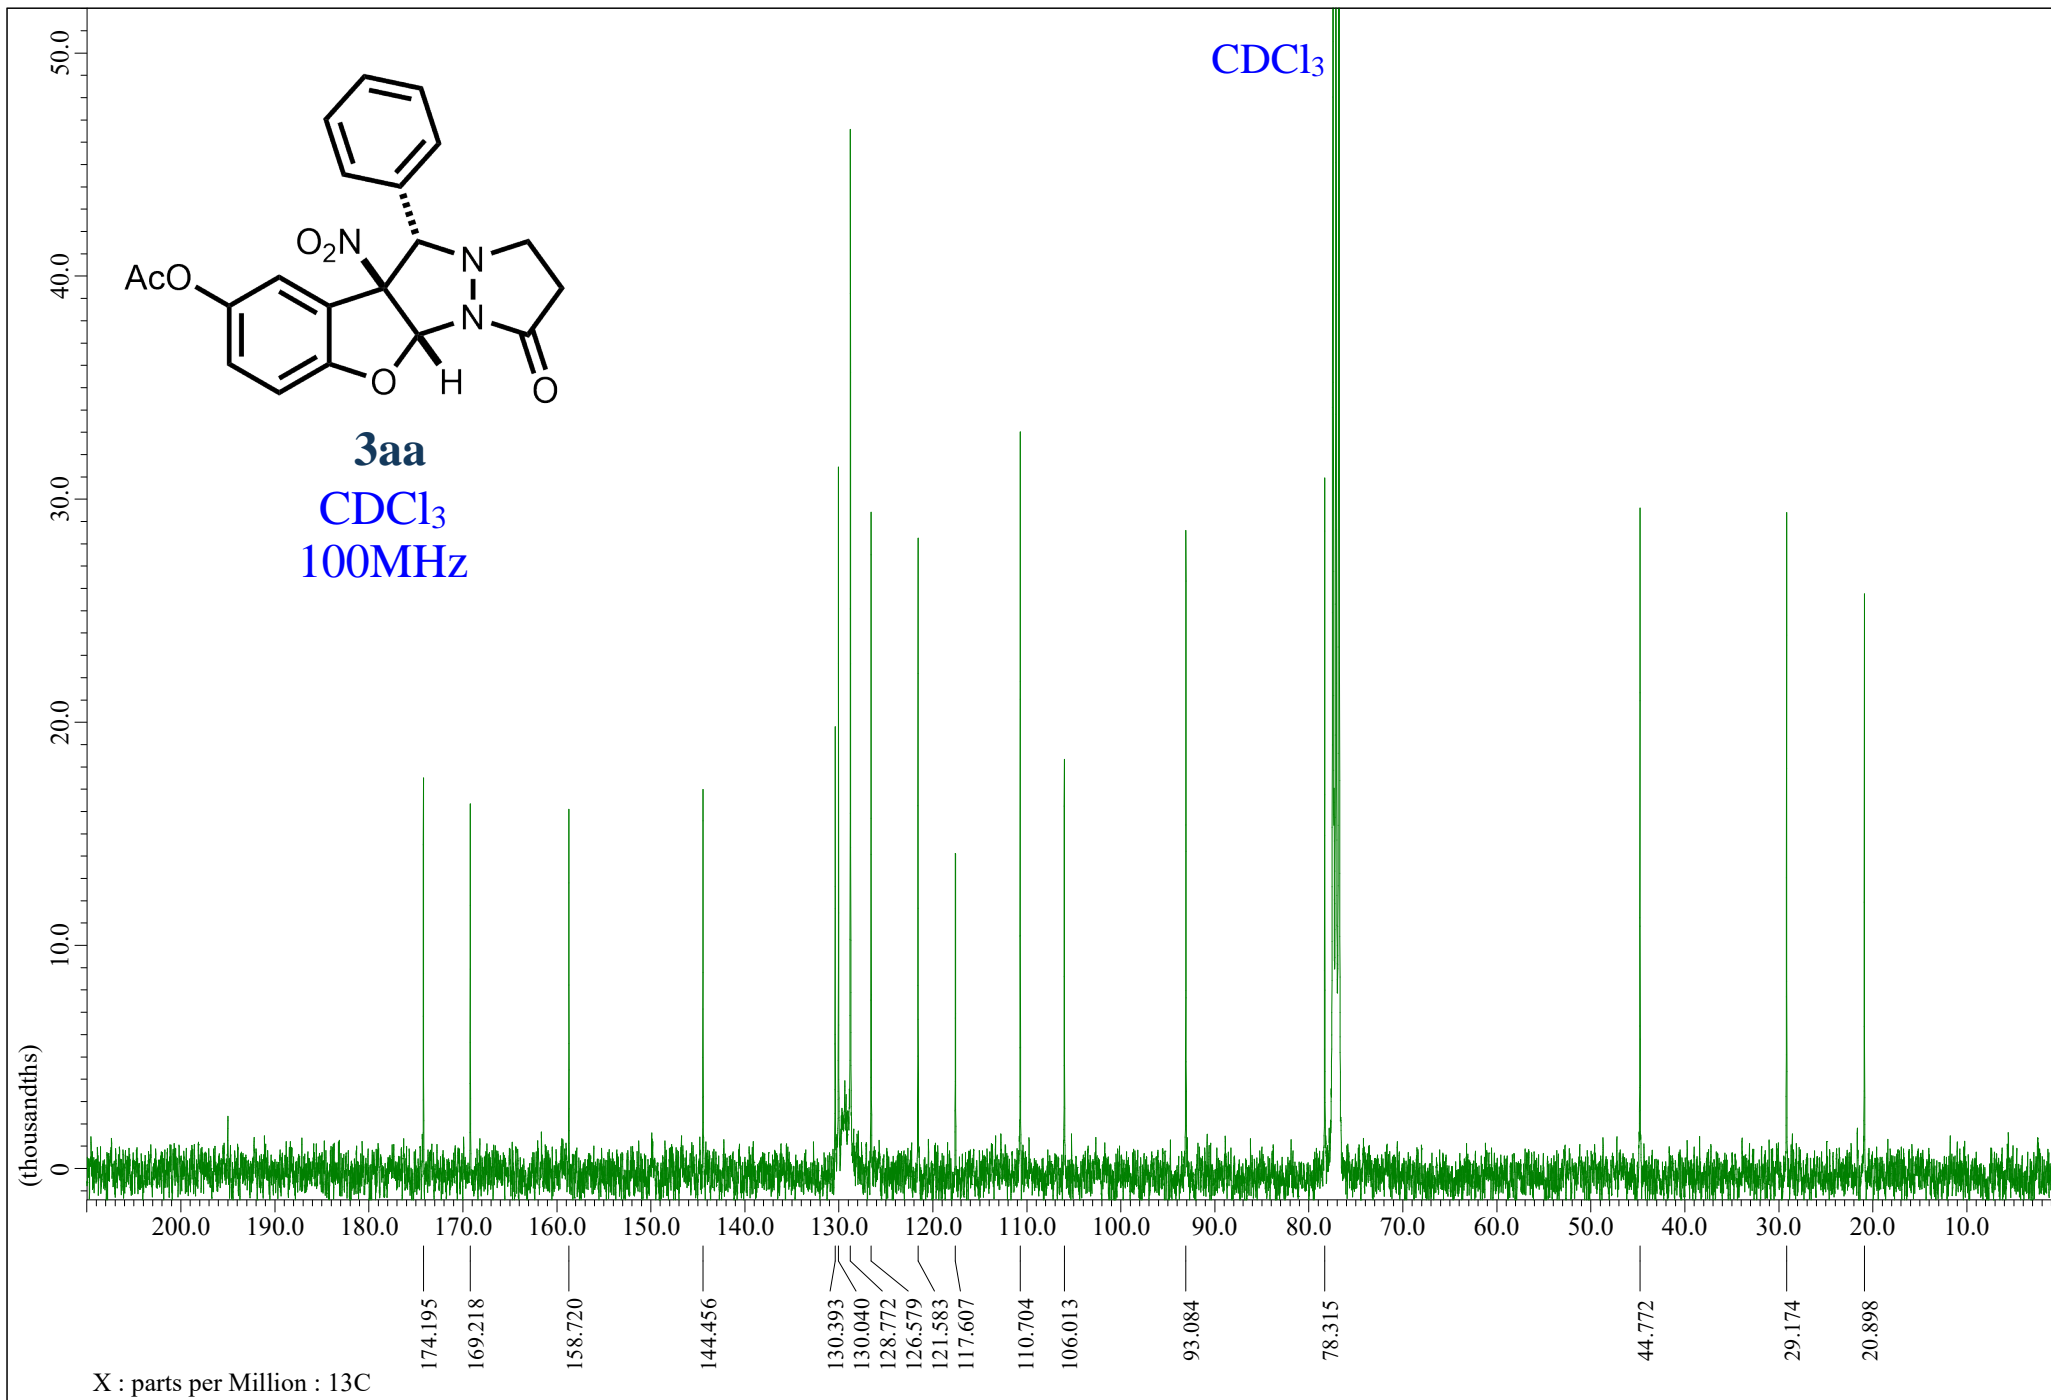

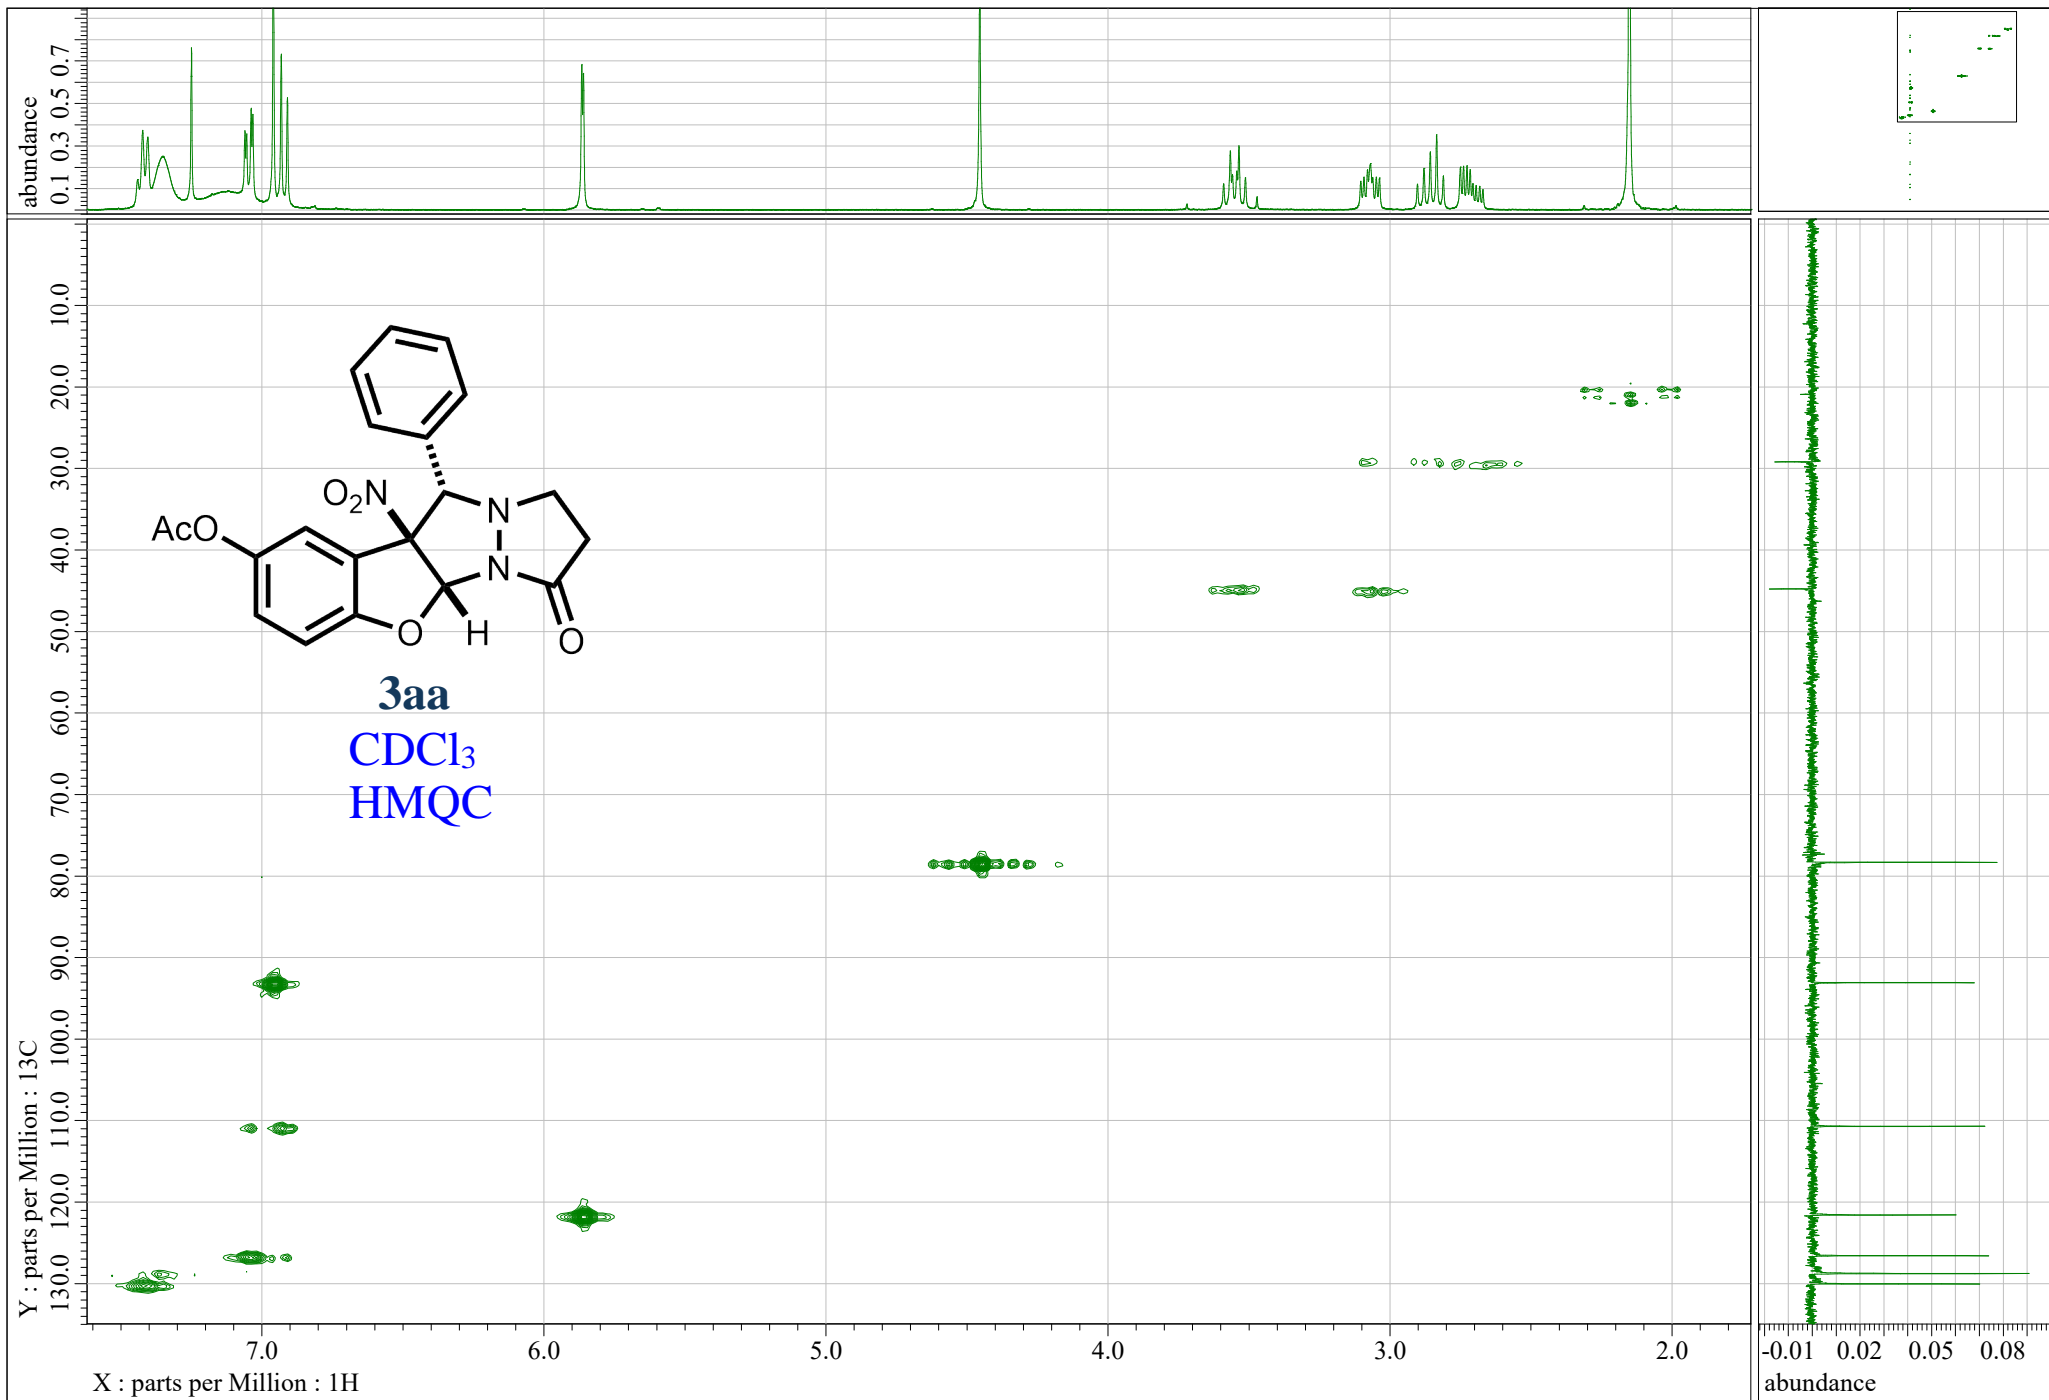

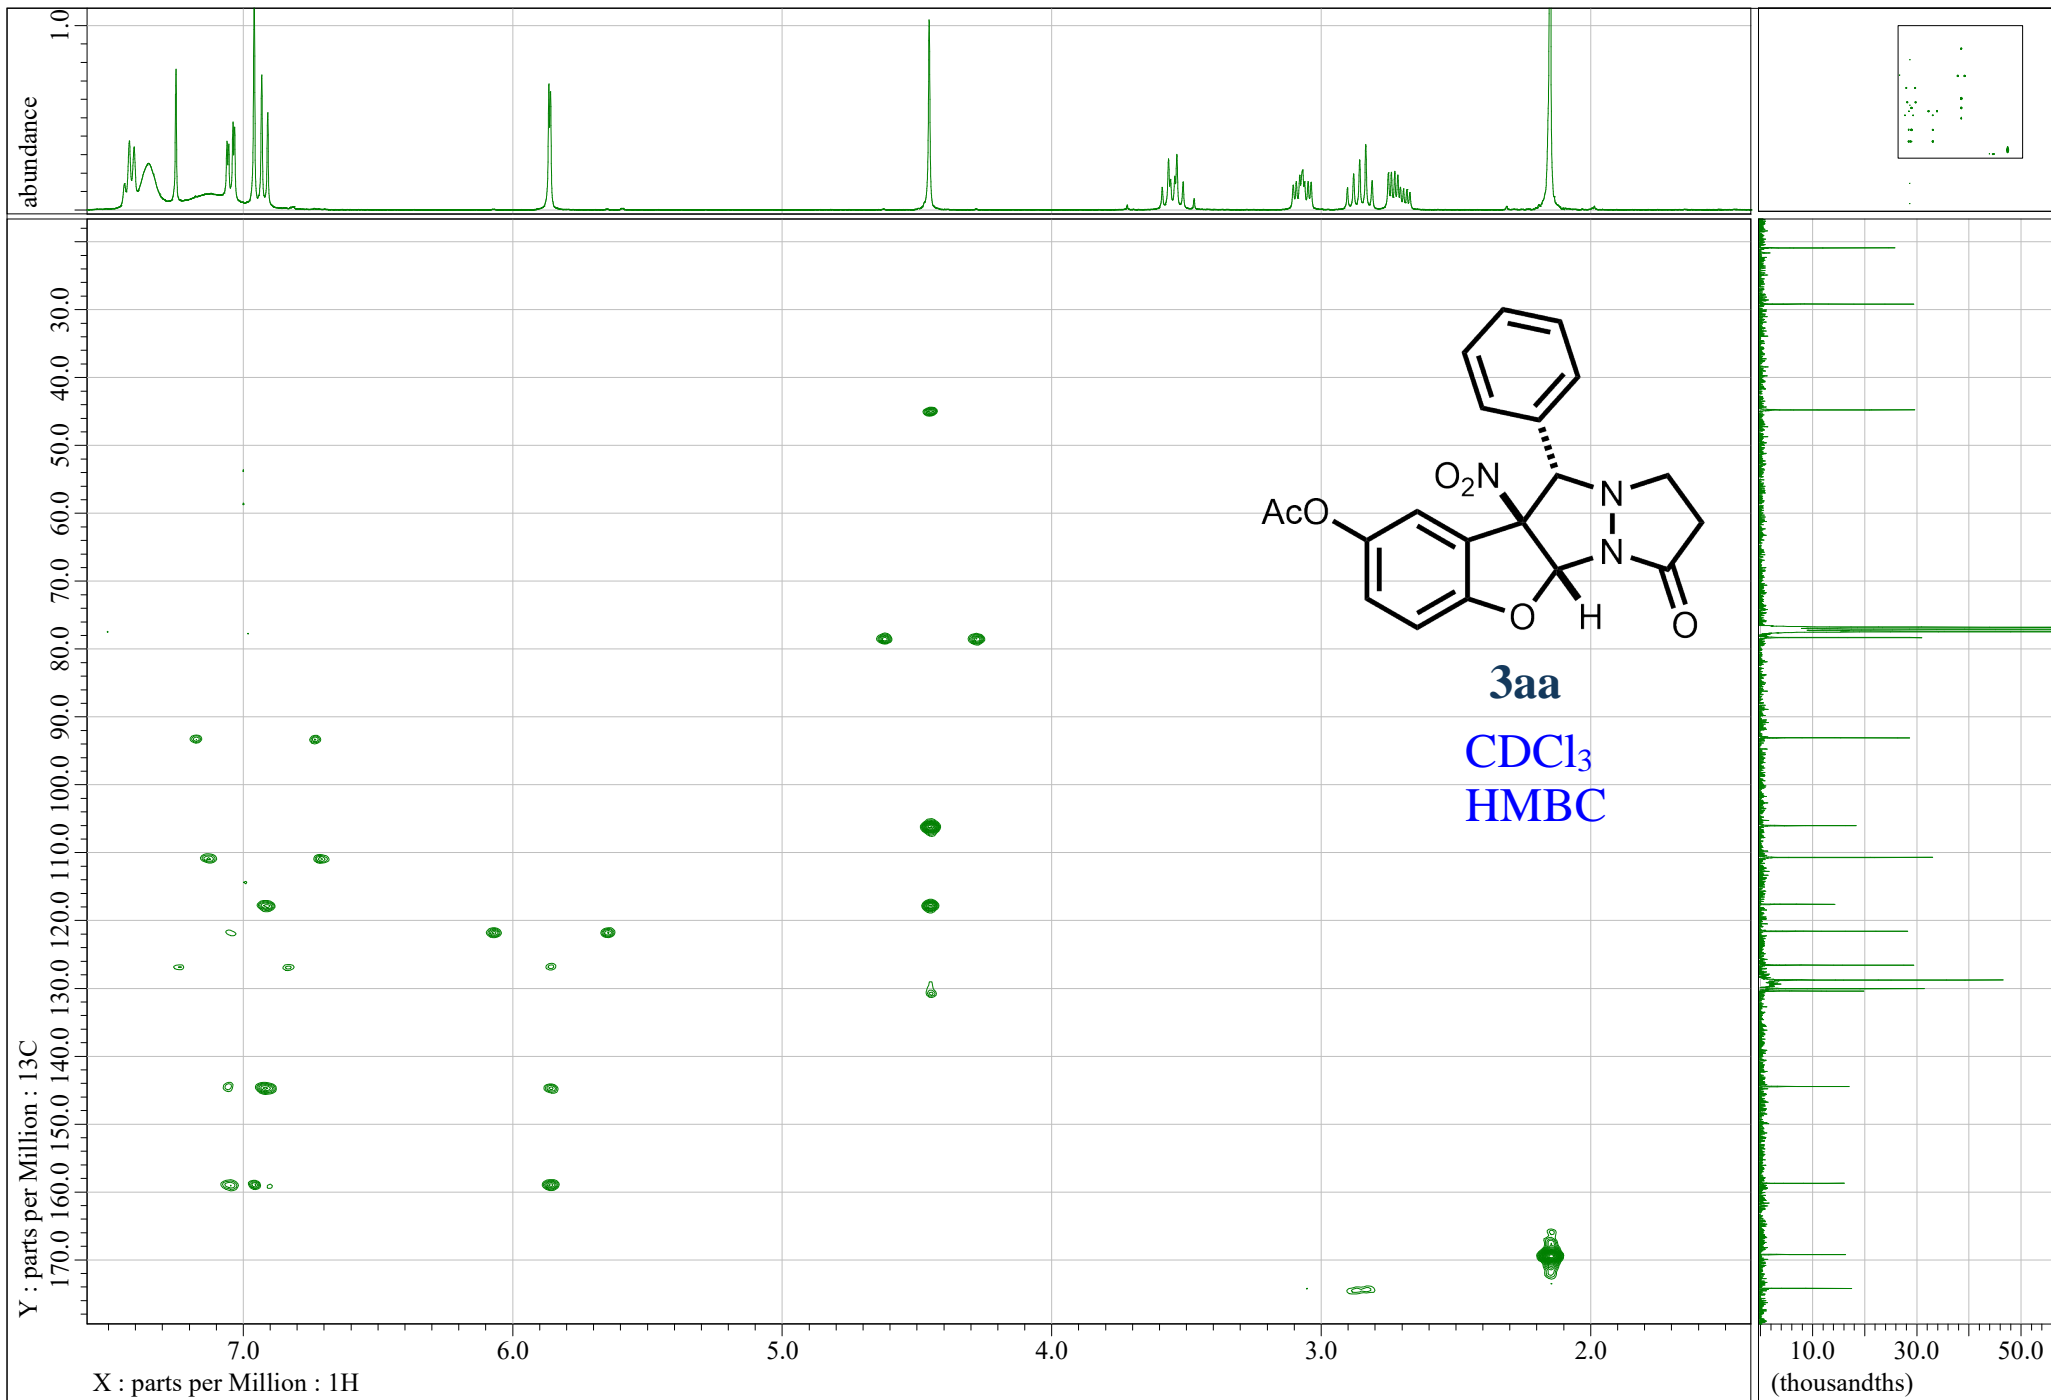

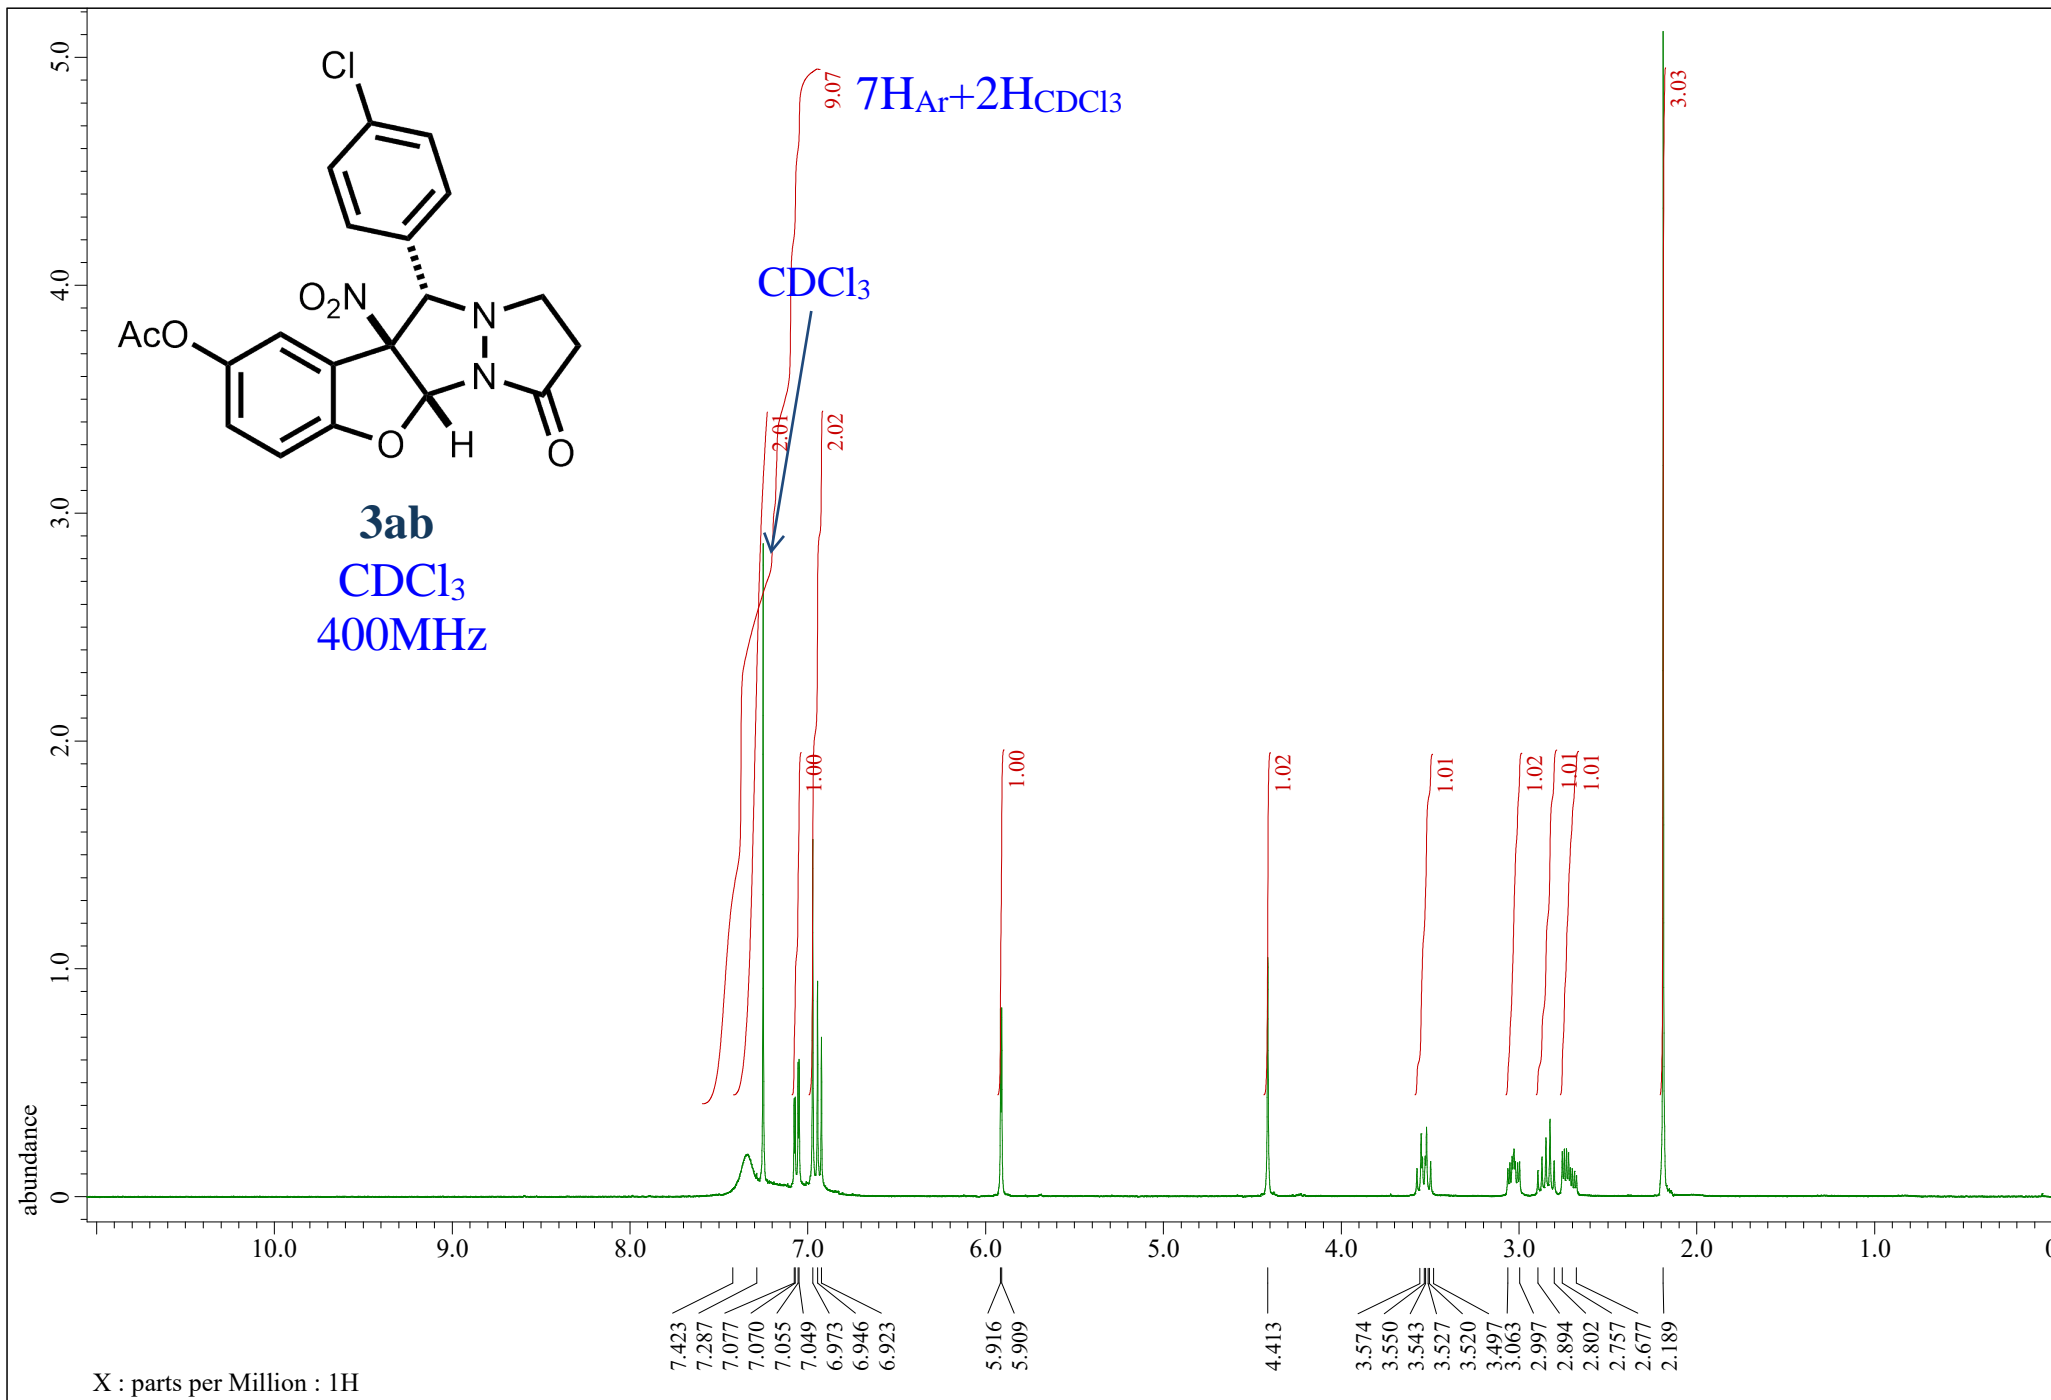

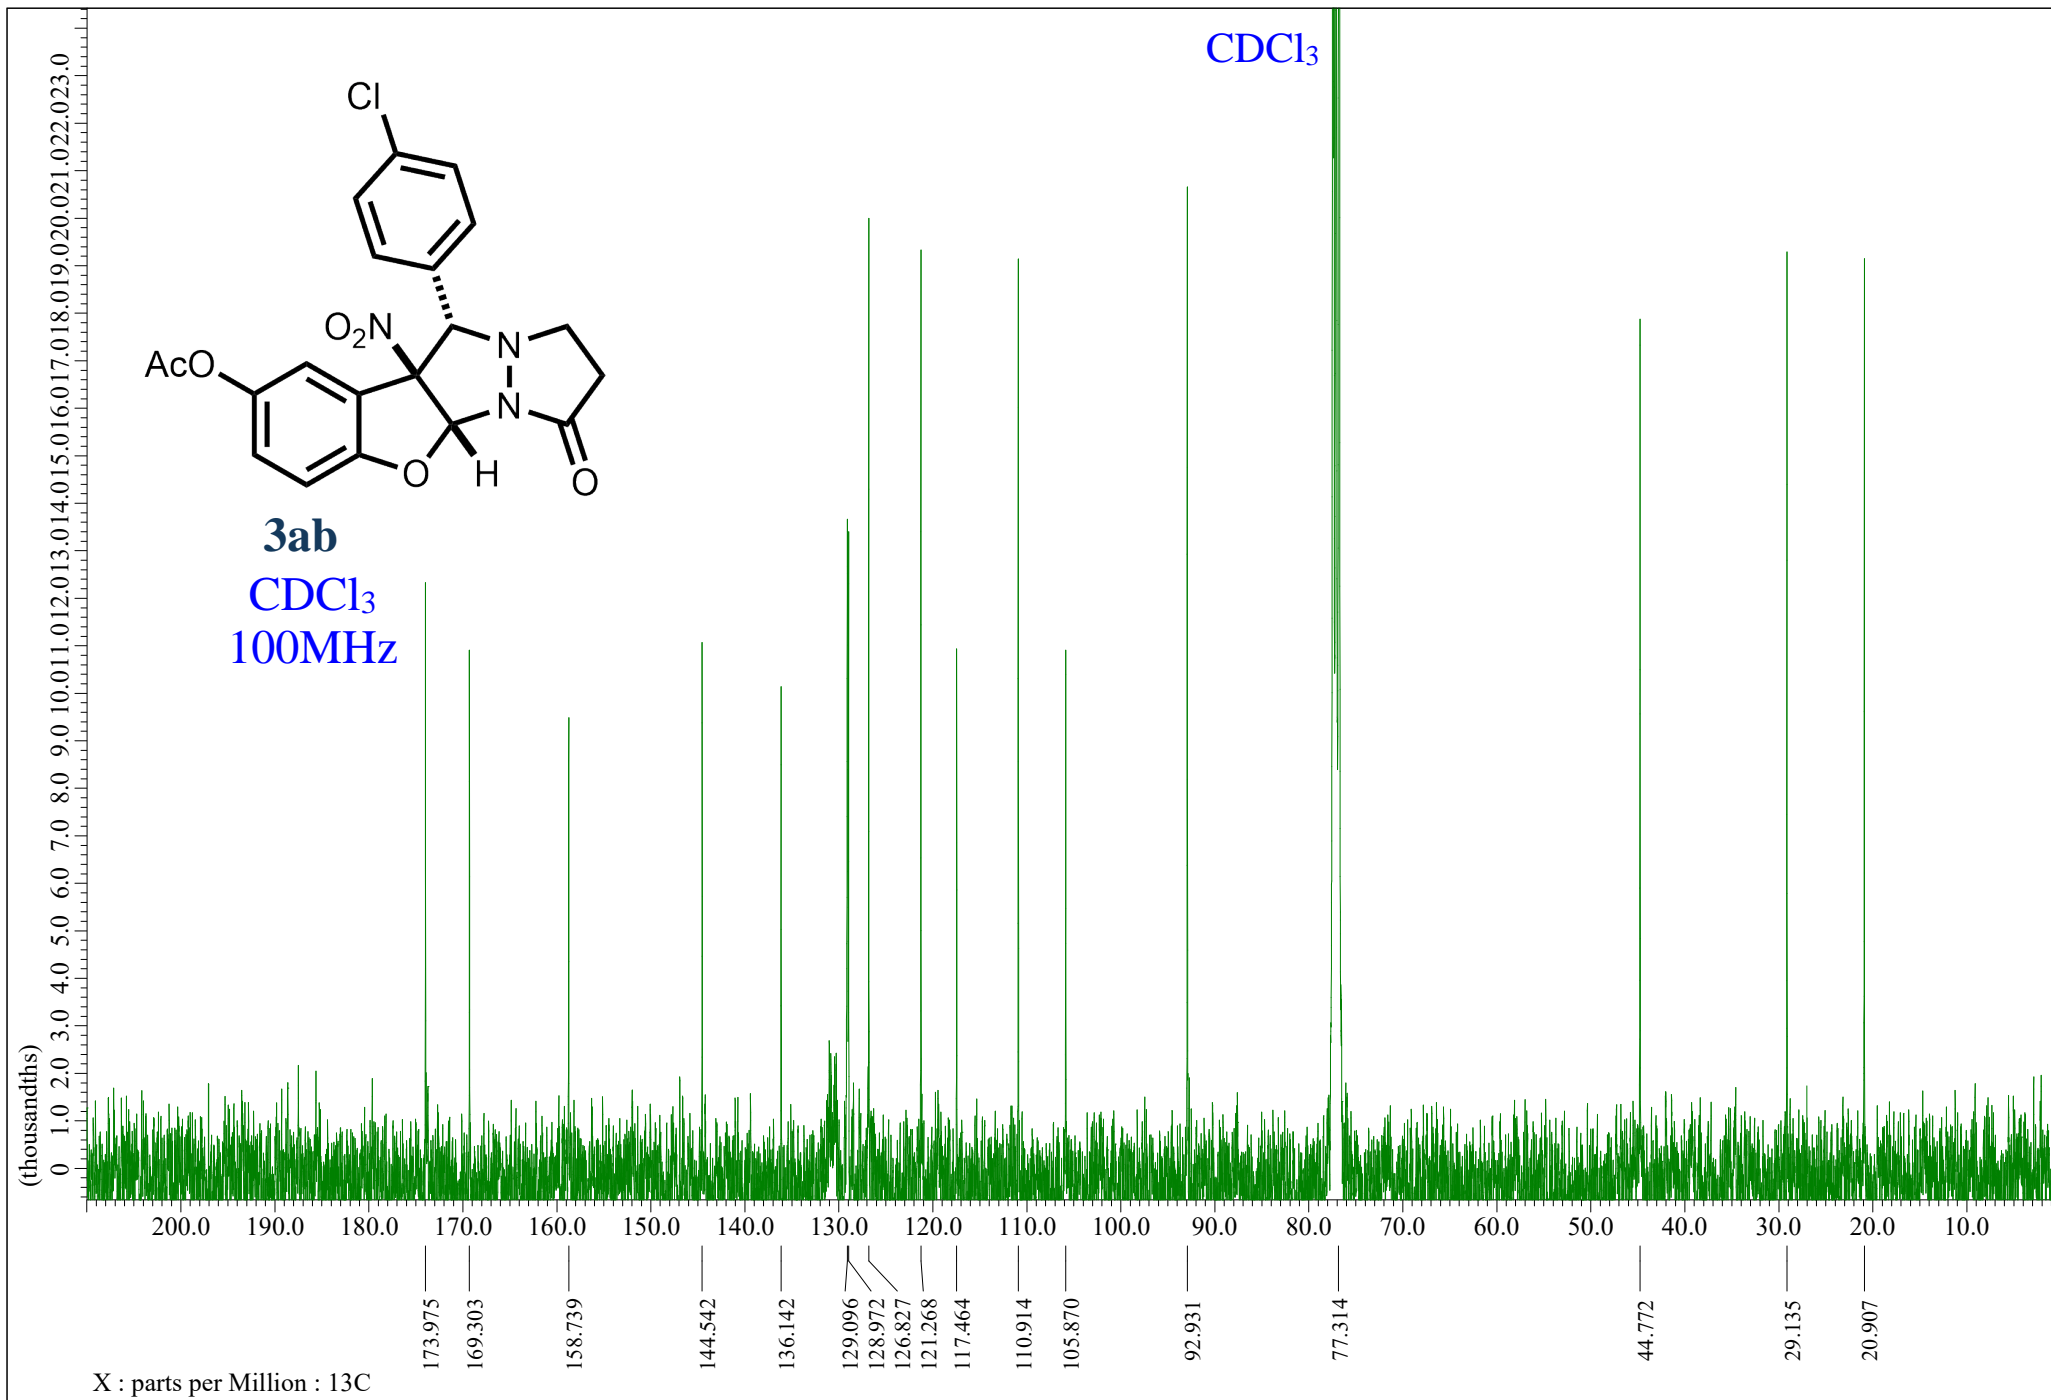



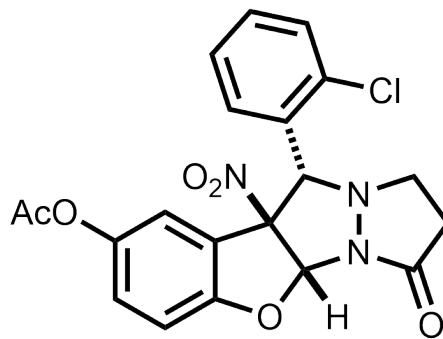

**3ac**  
 CDCl<sub>3</sub>  
 400MHz

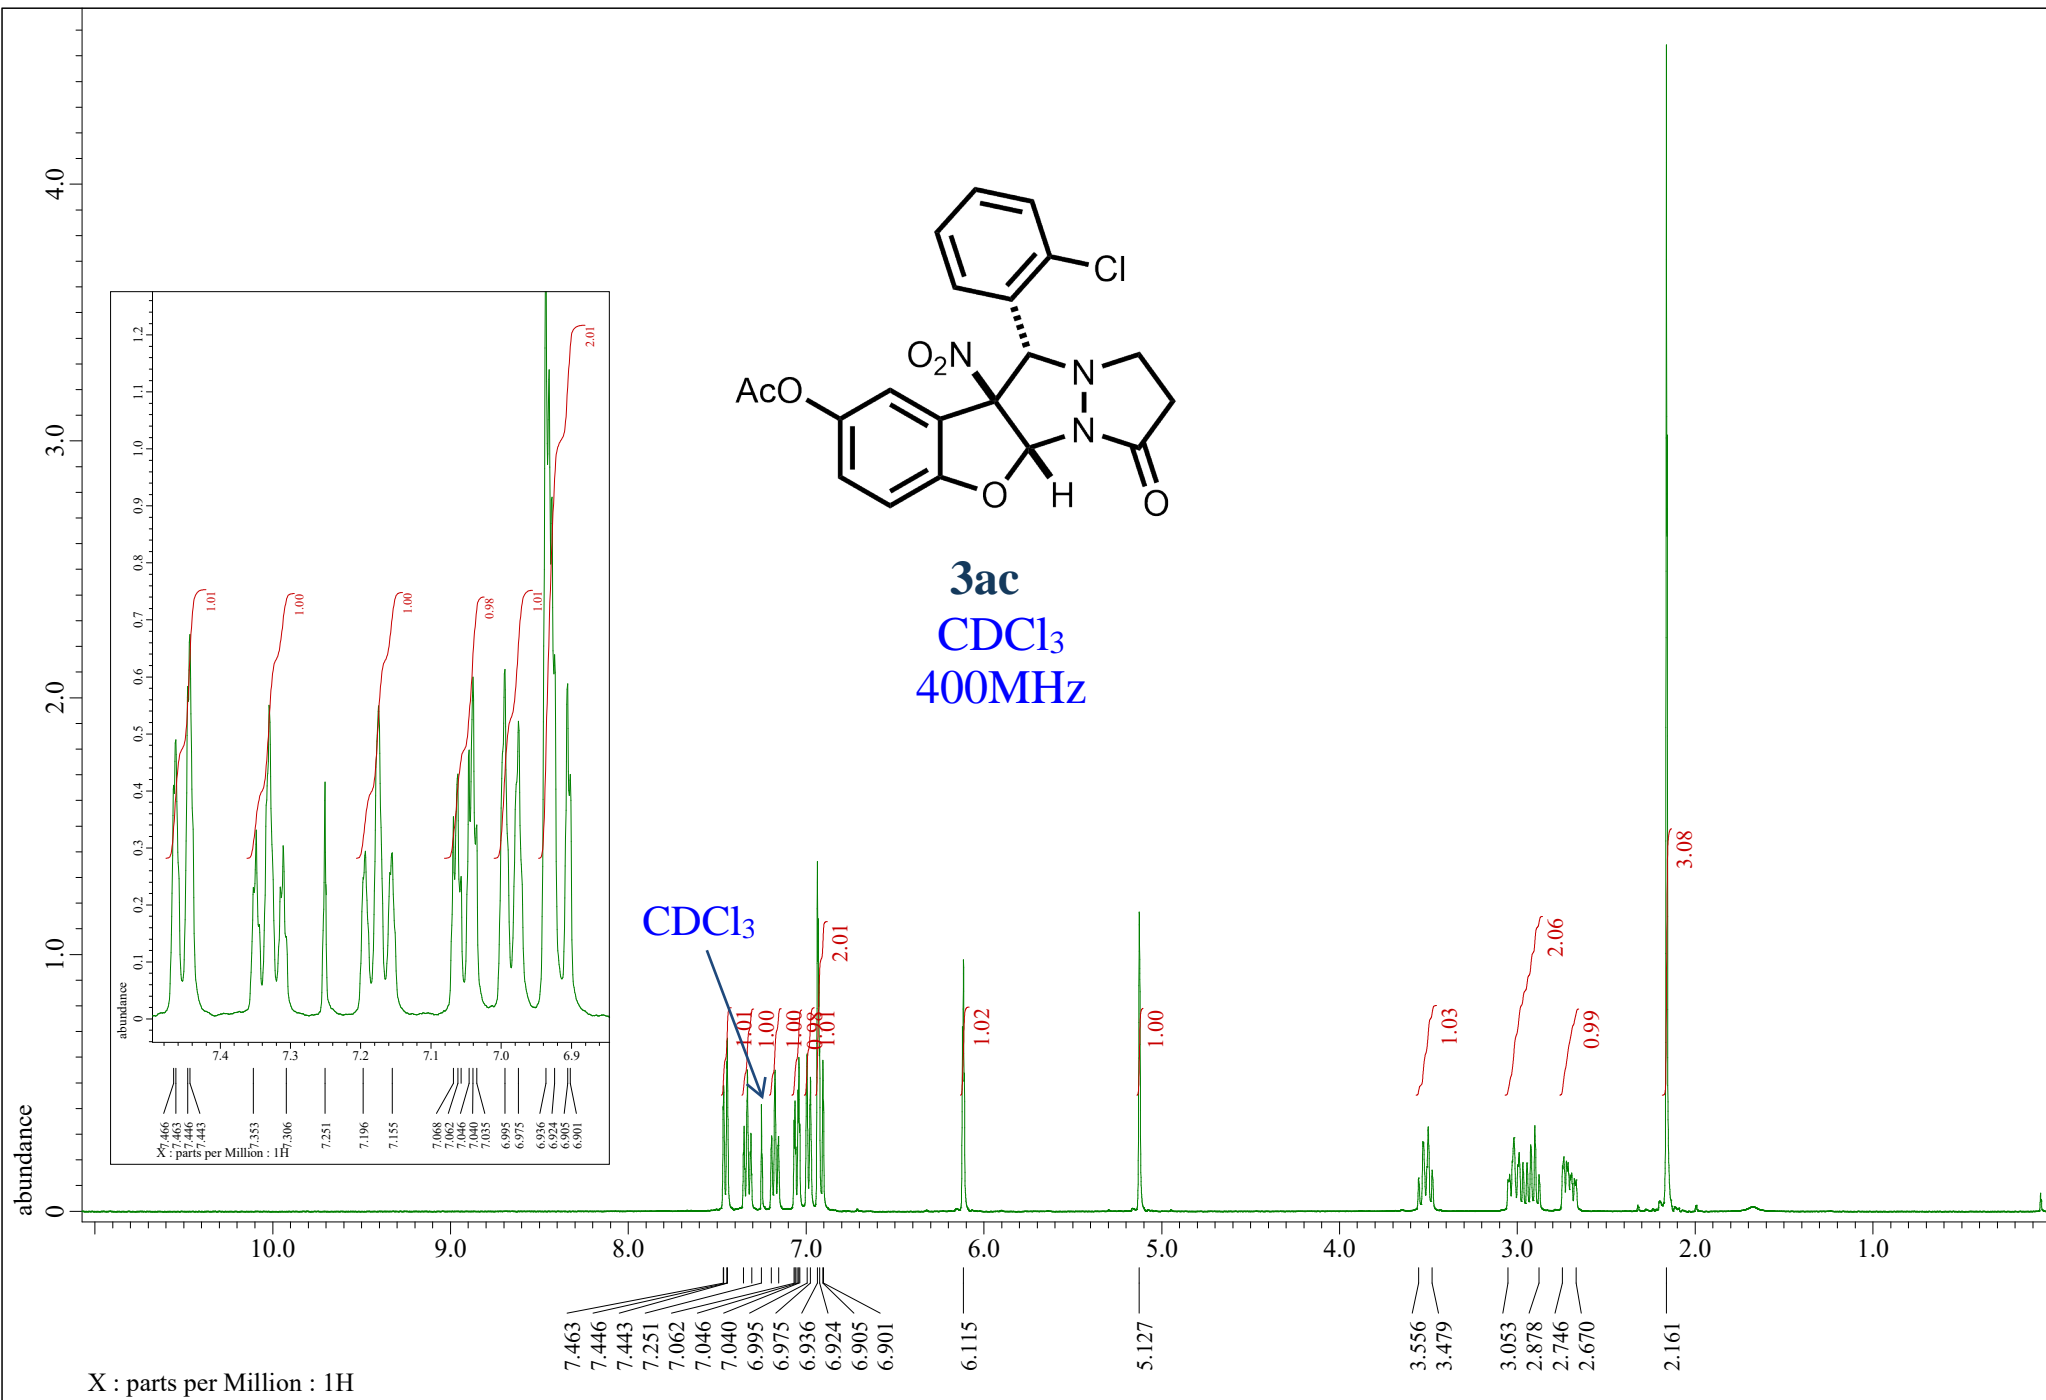

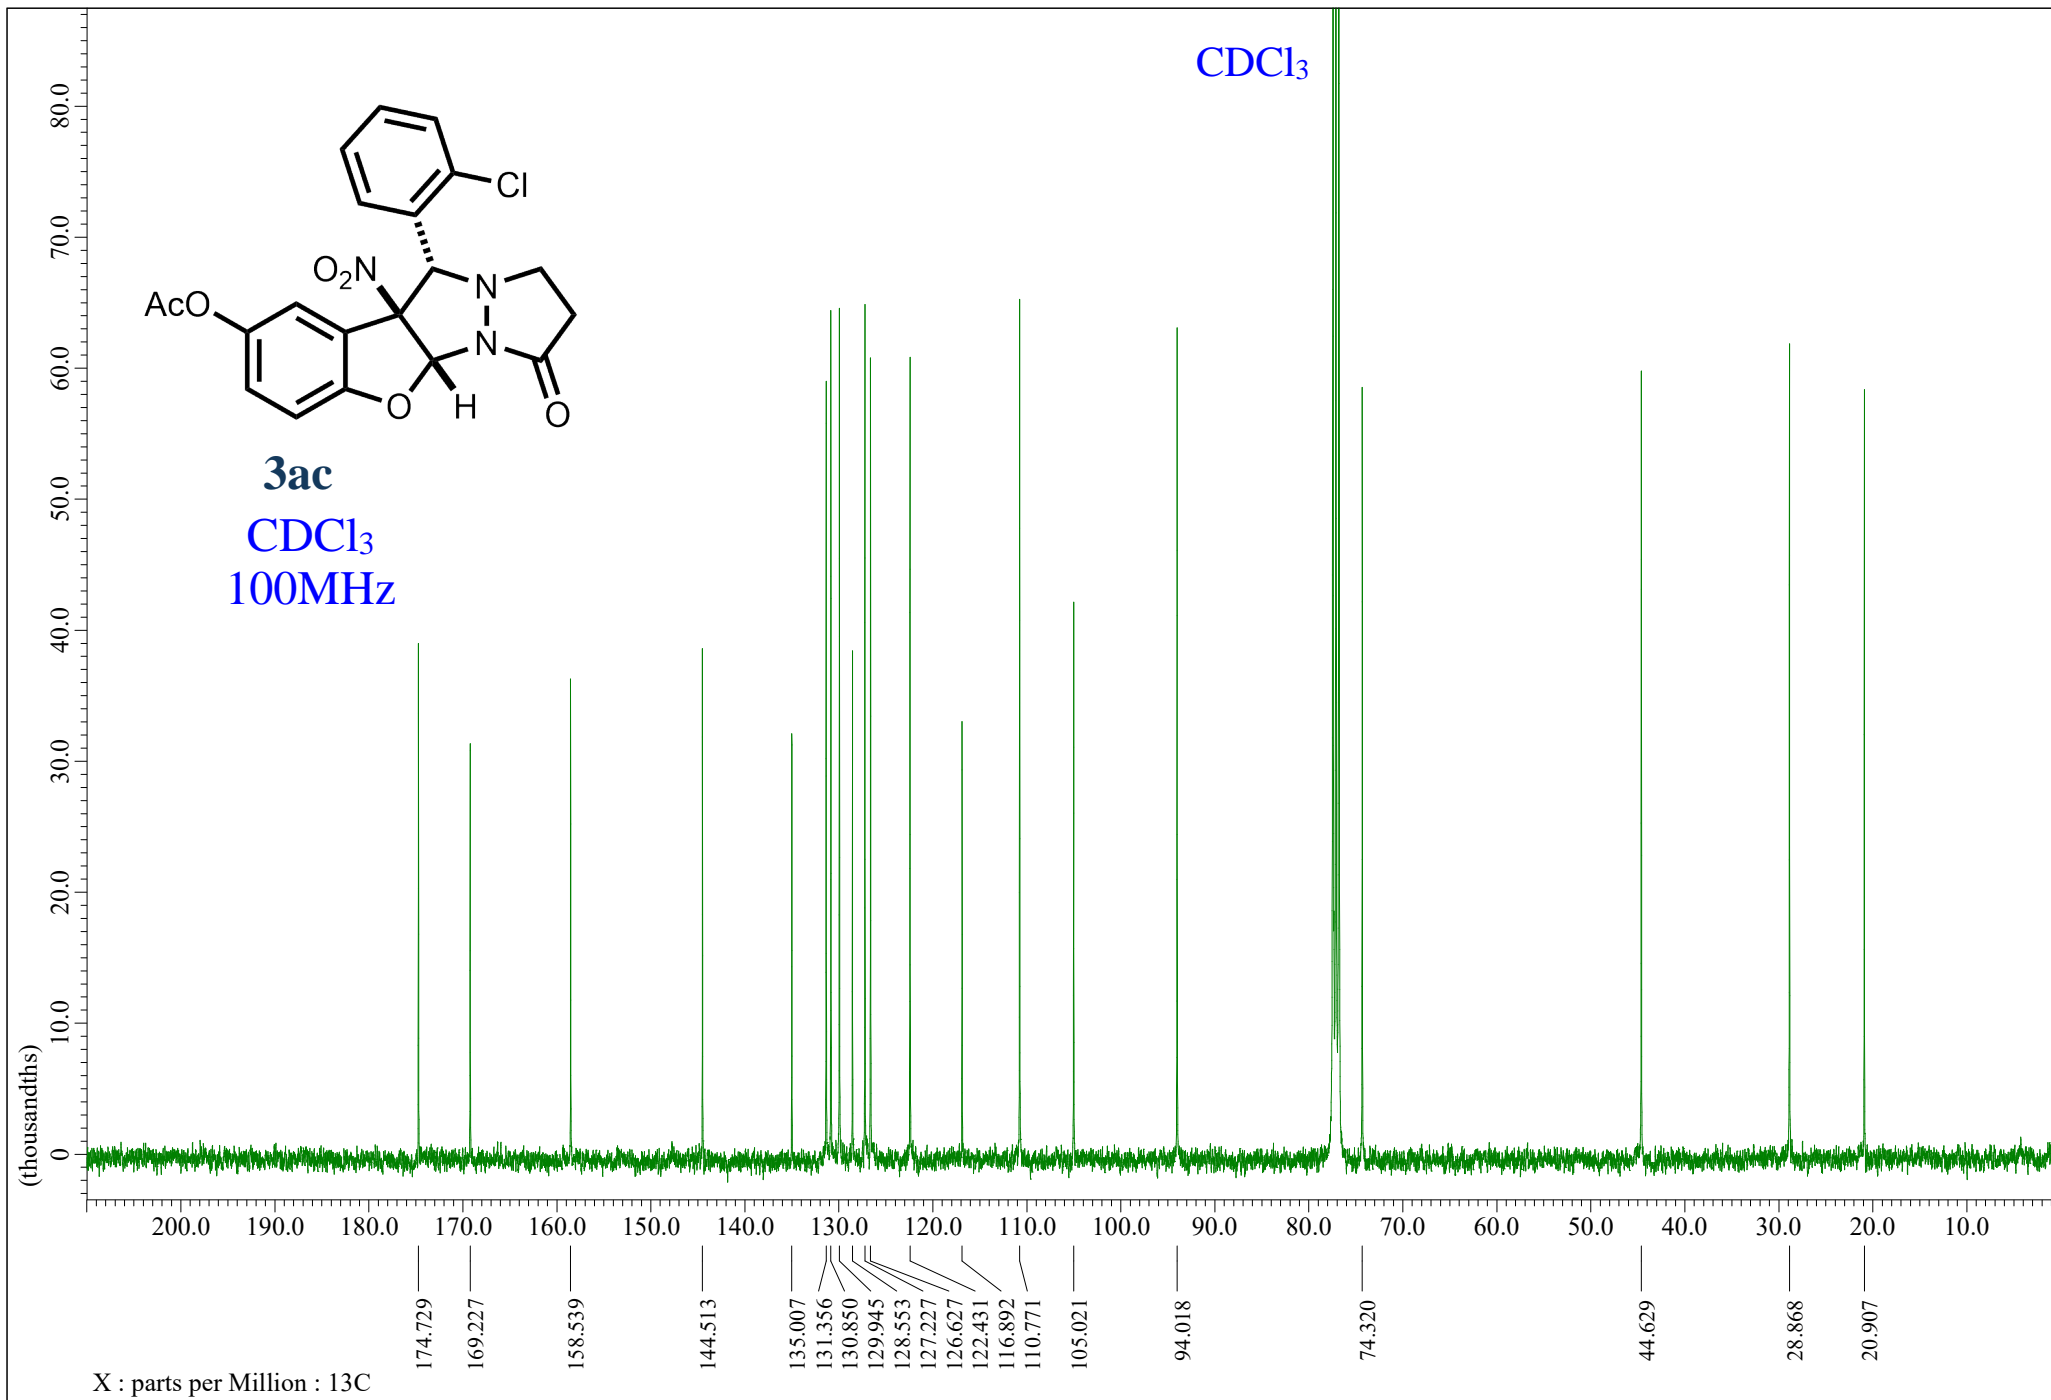

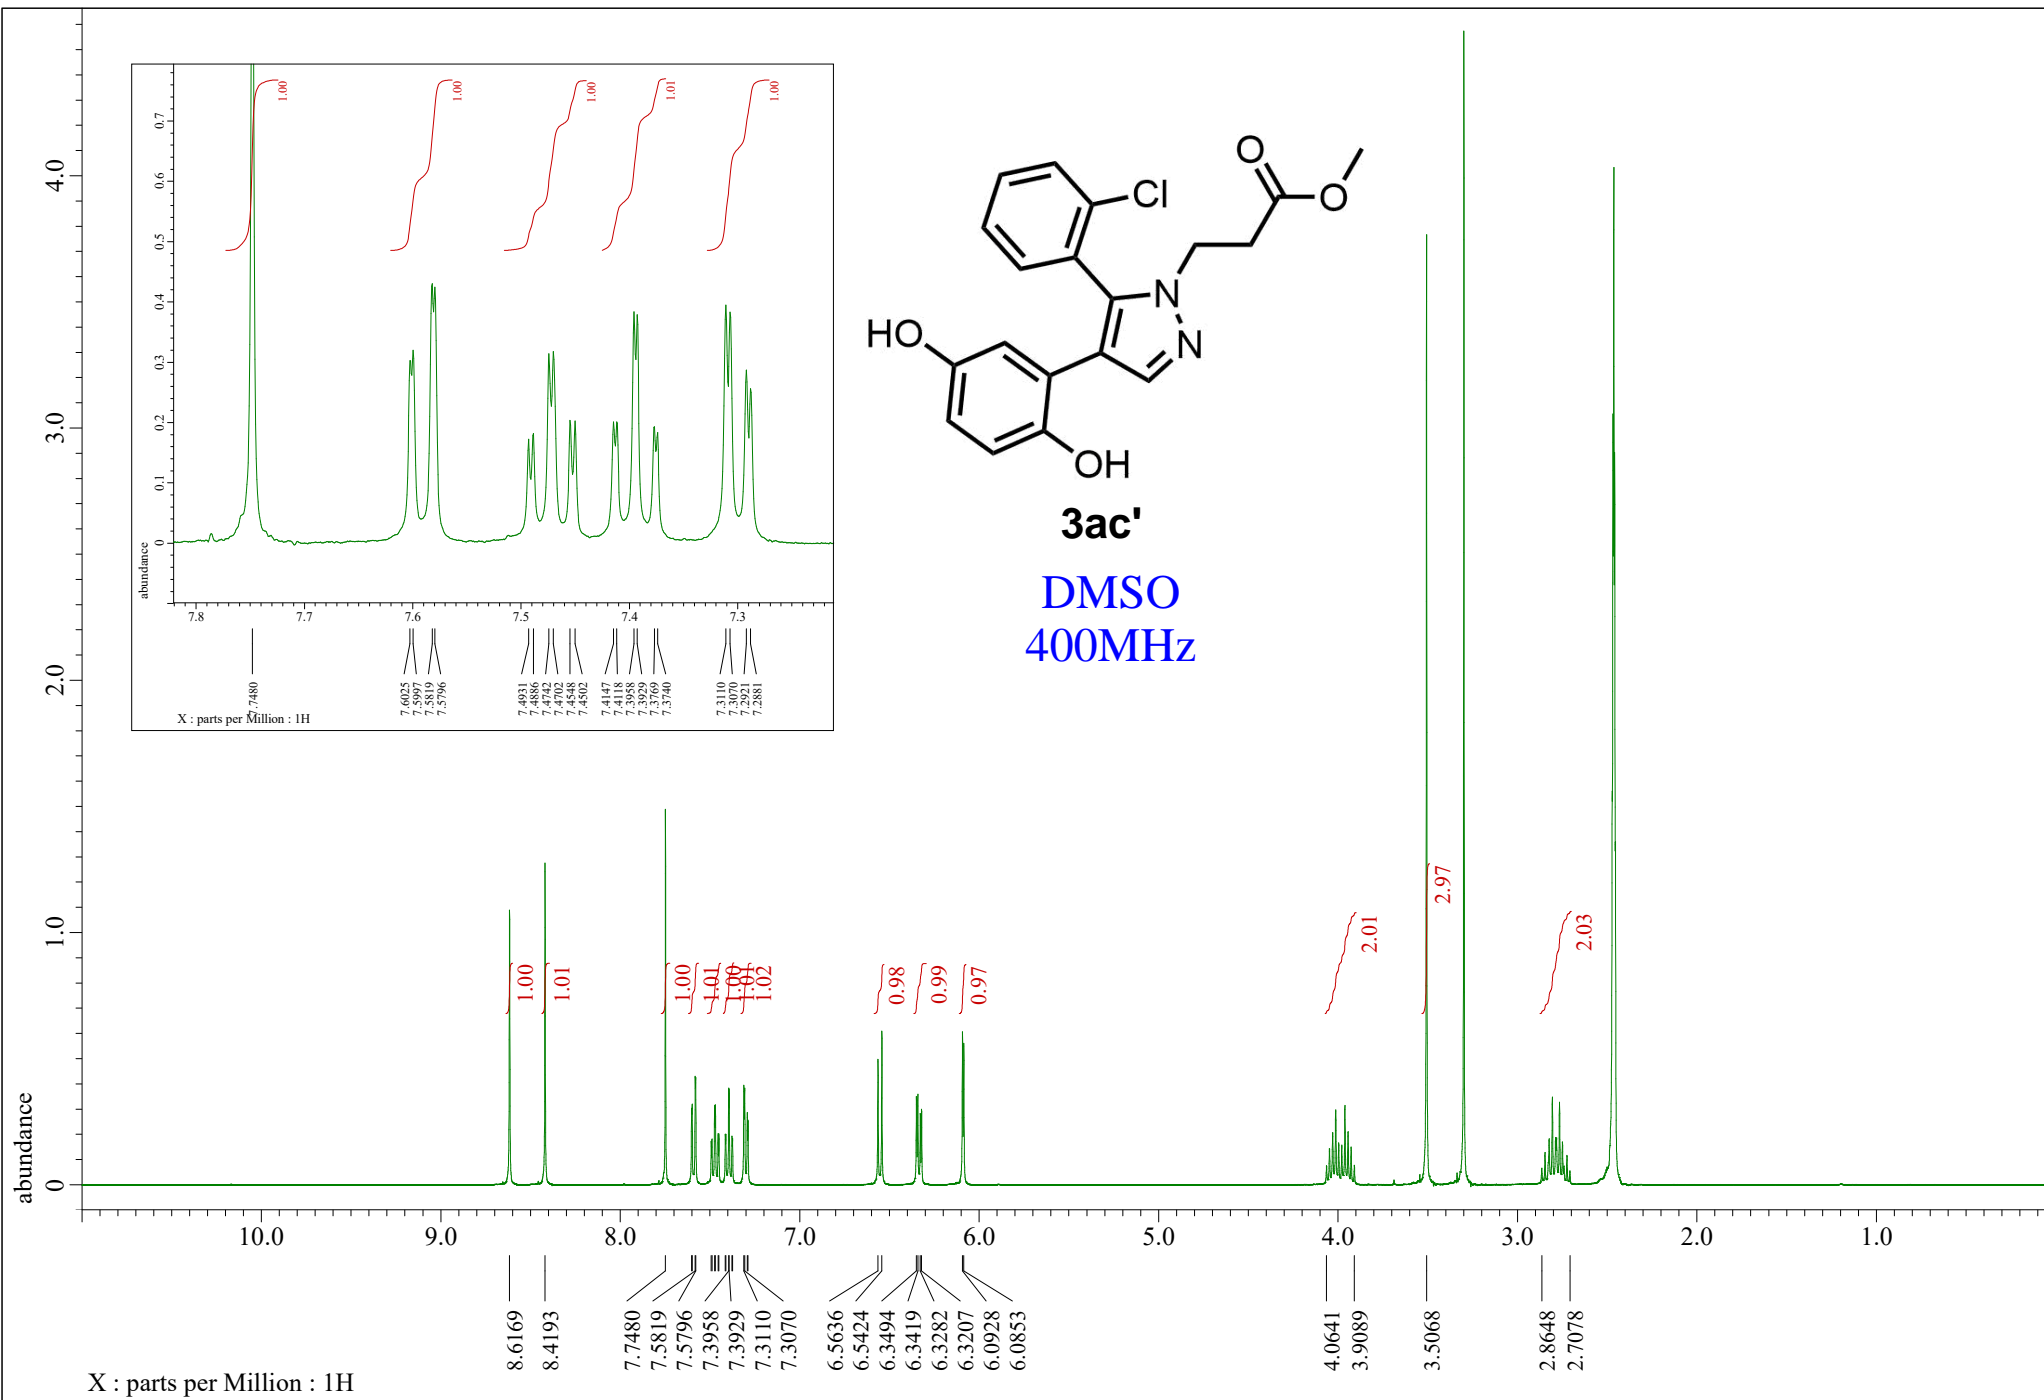

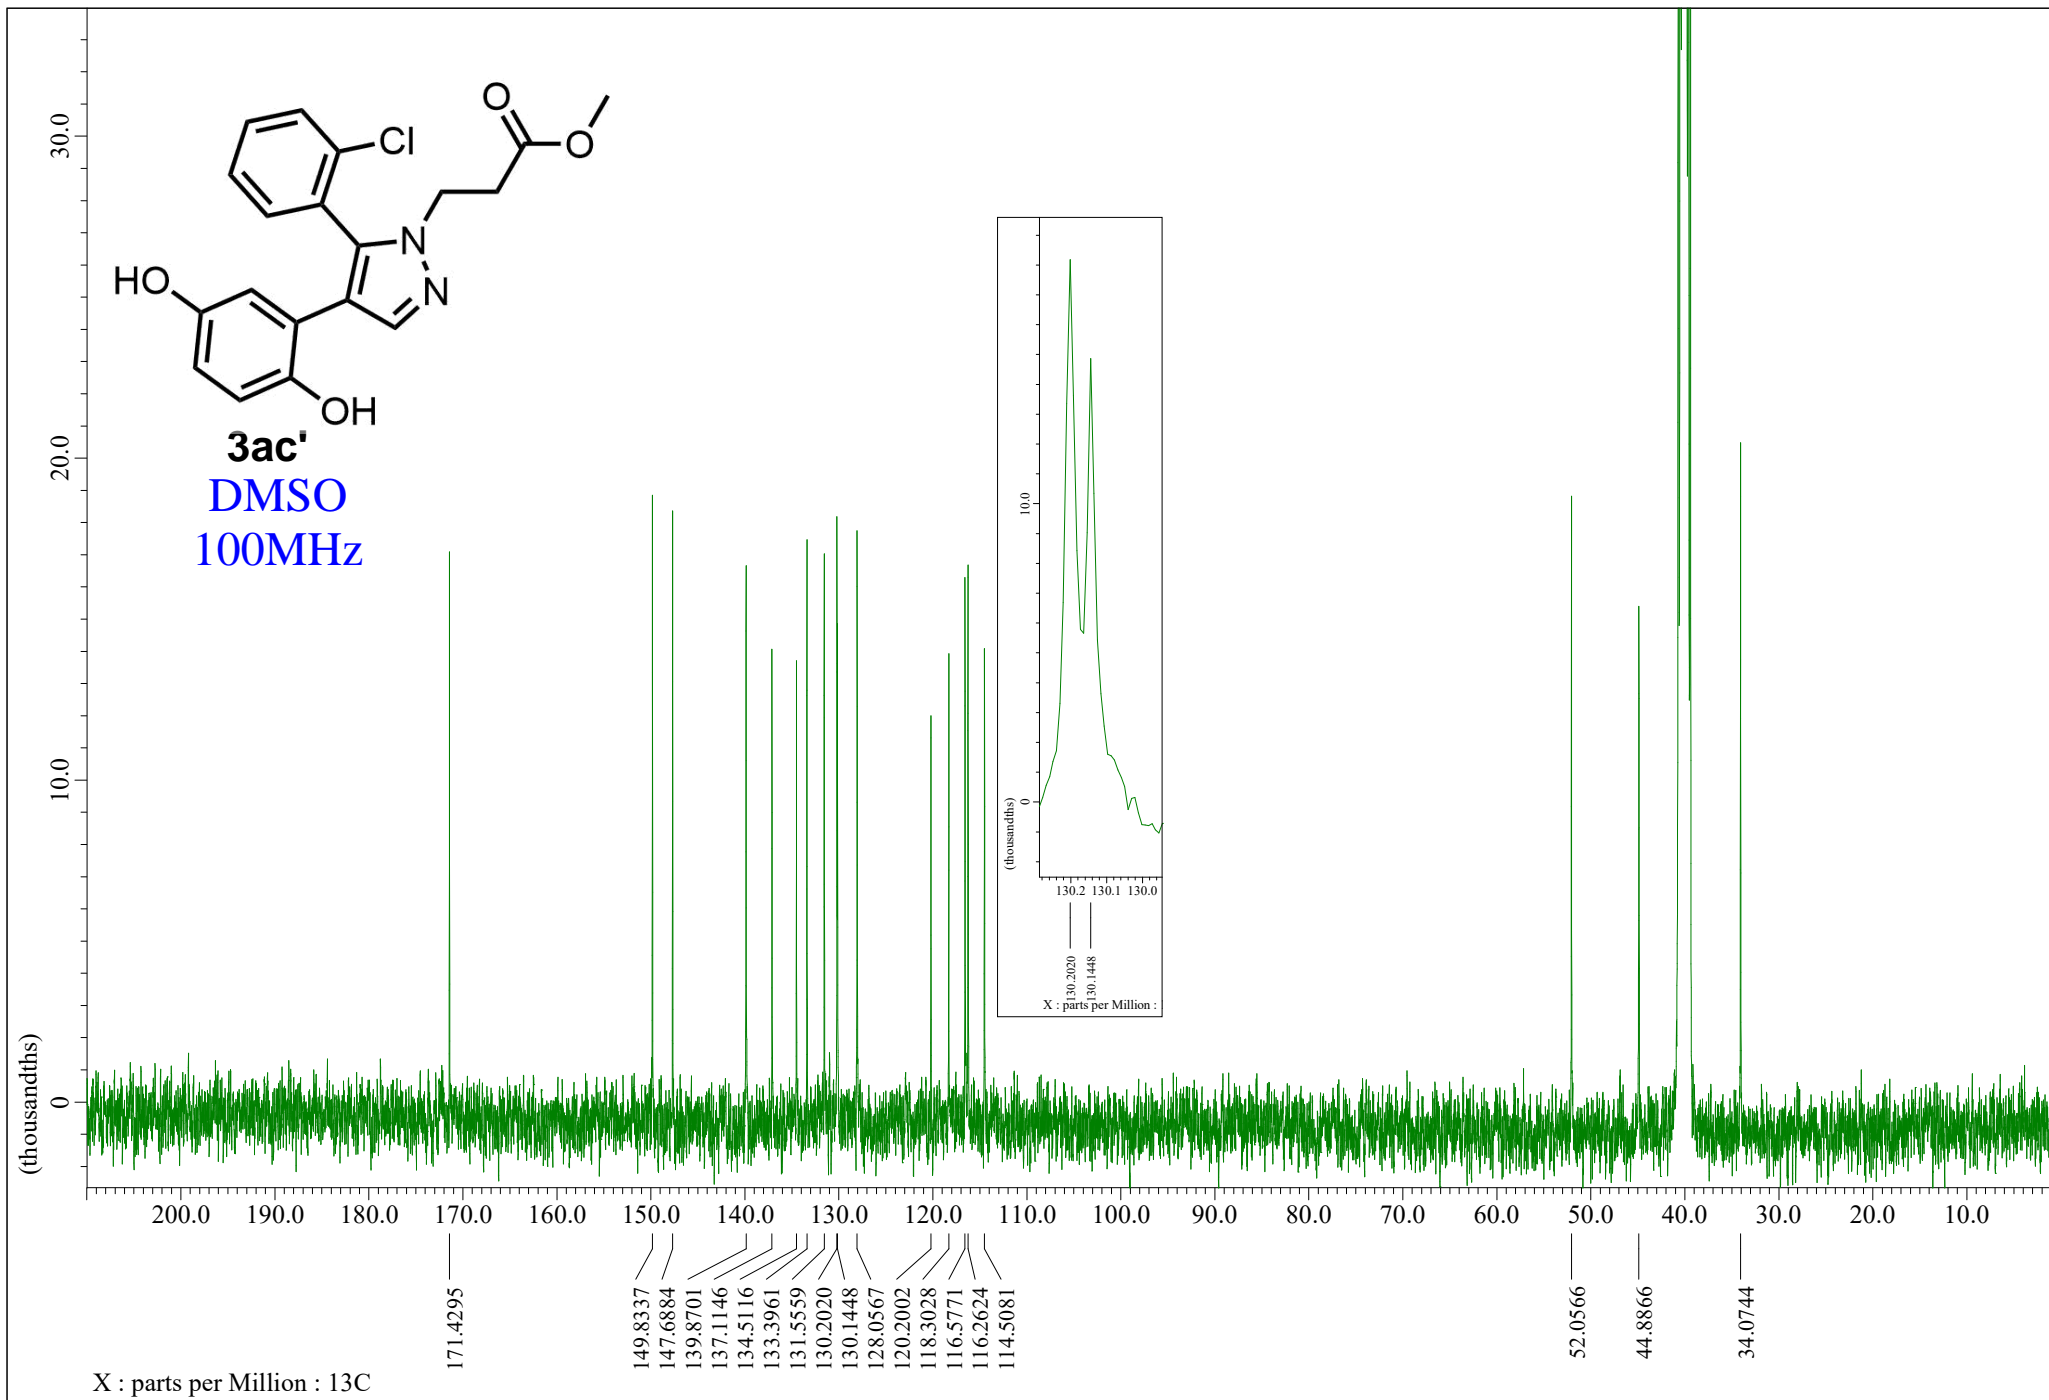

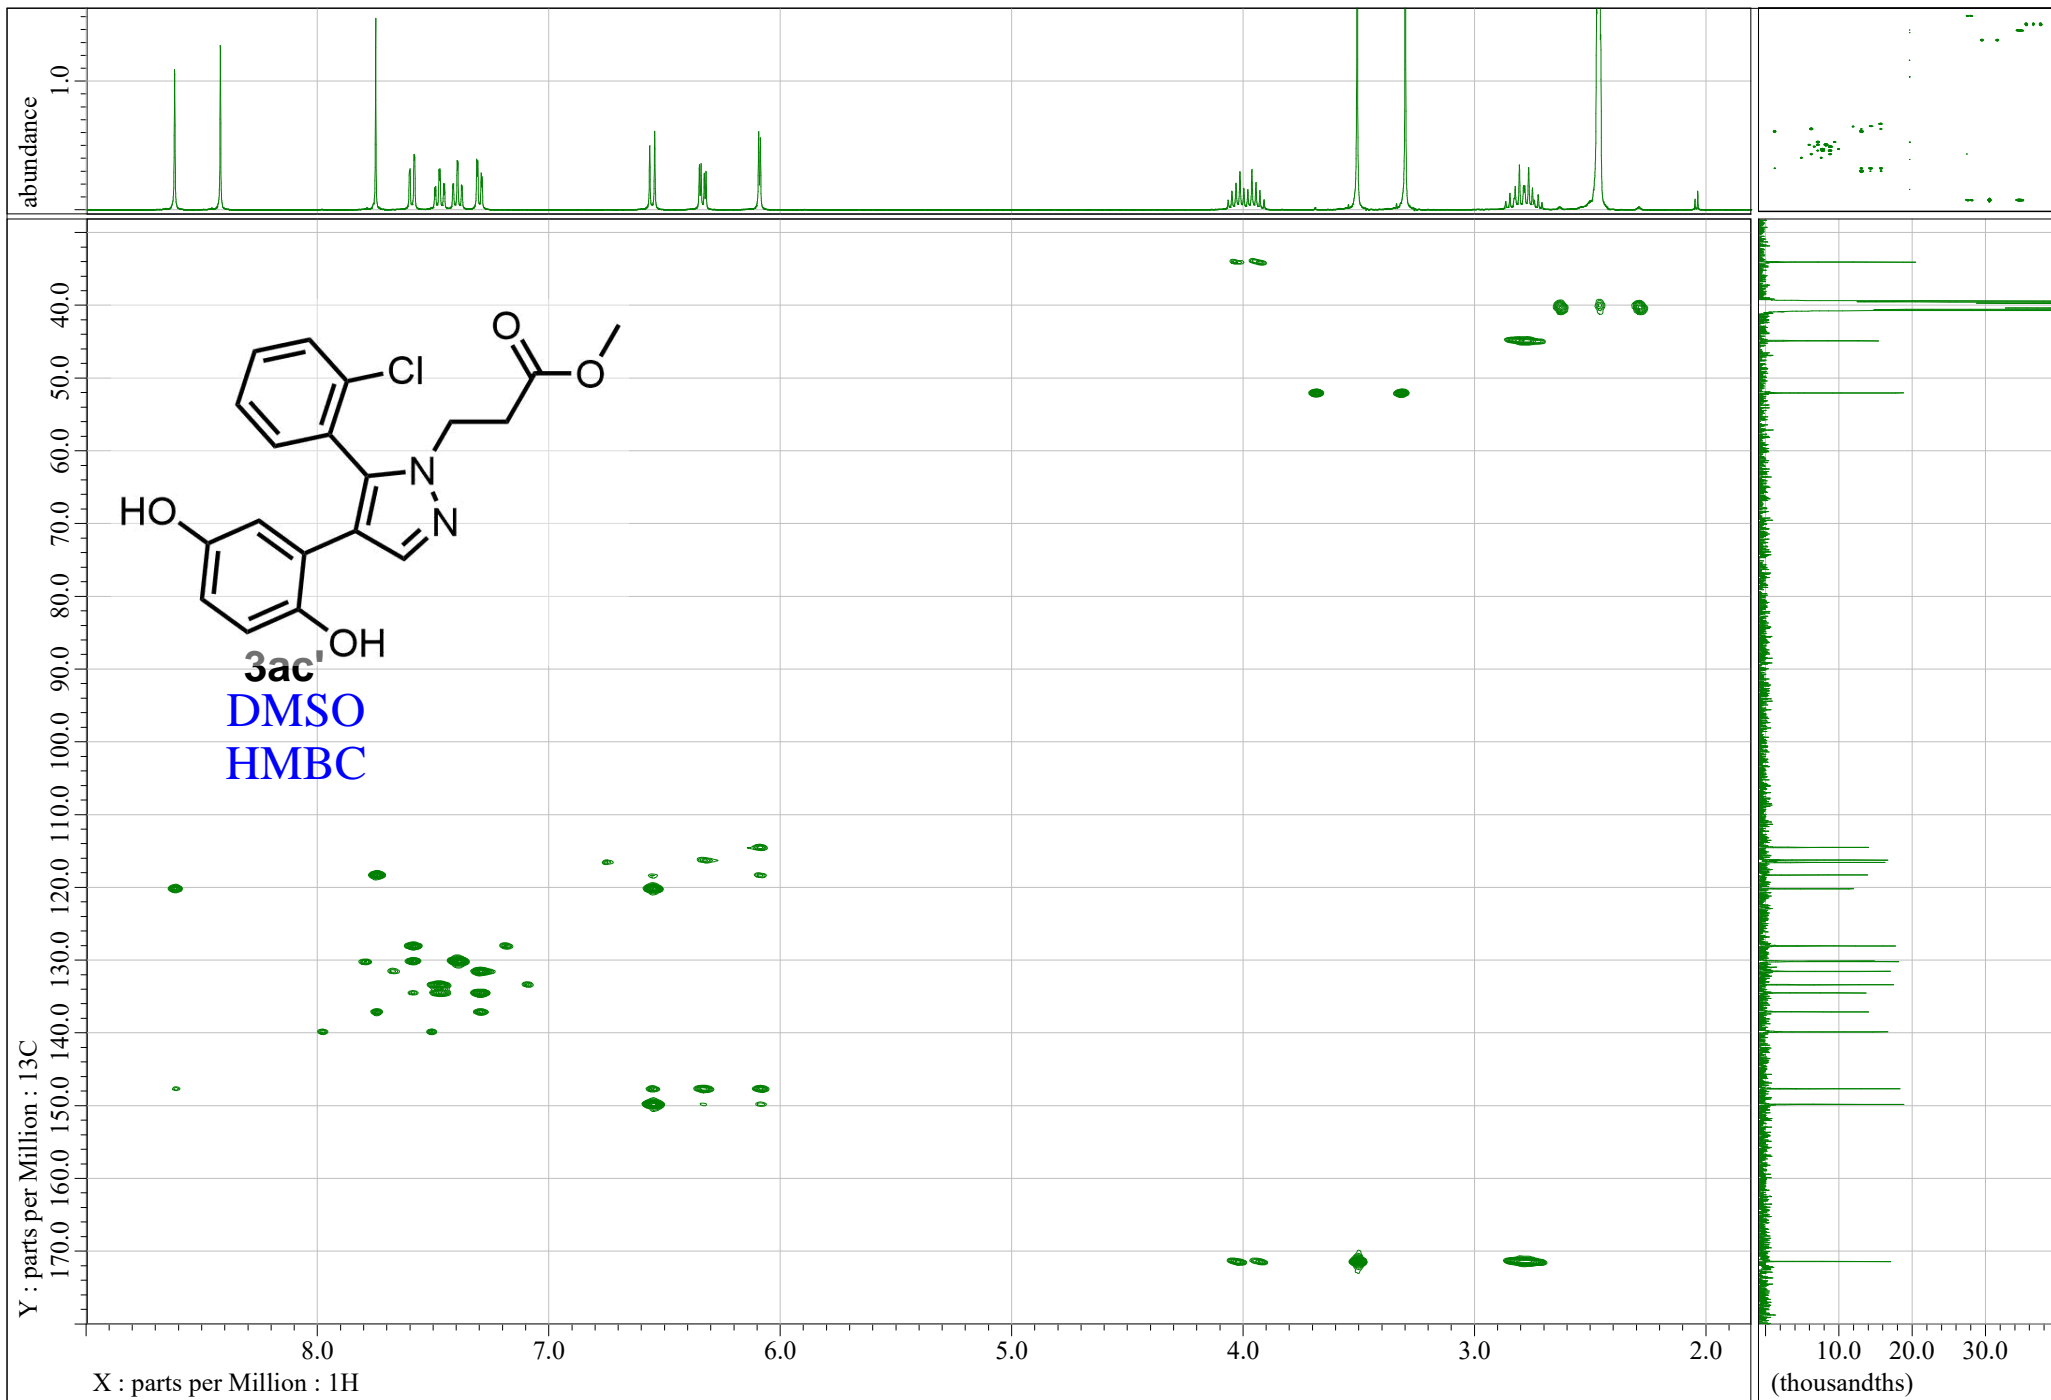

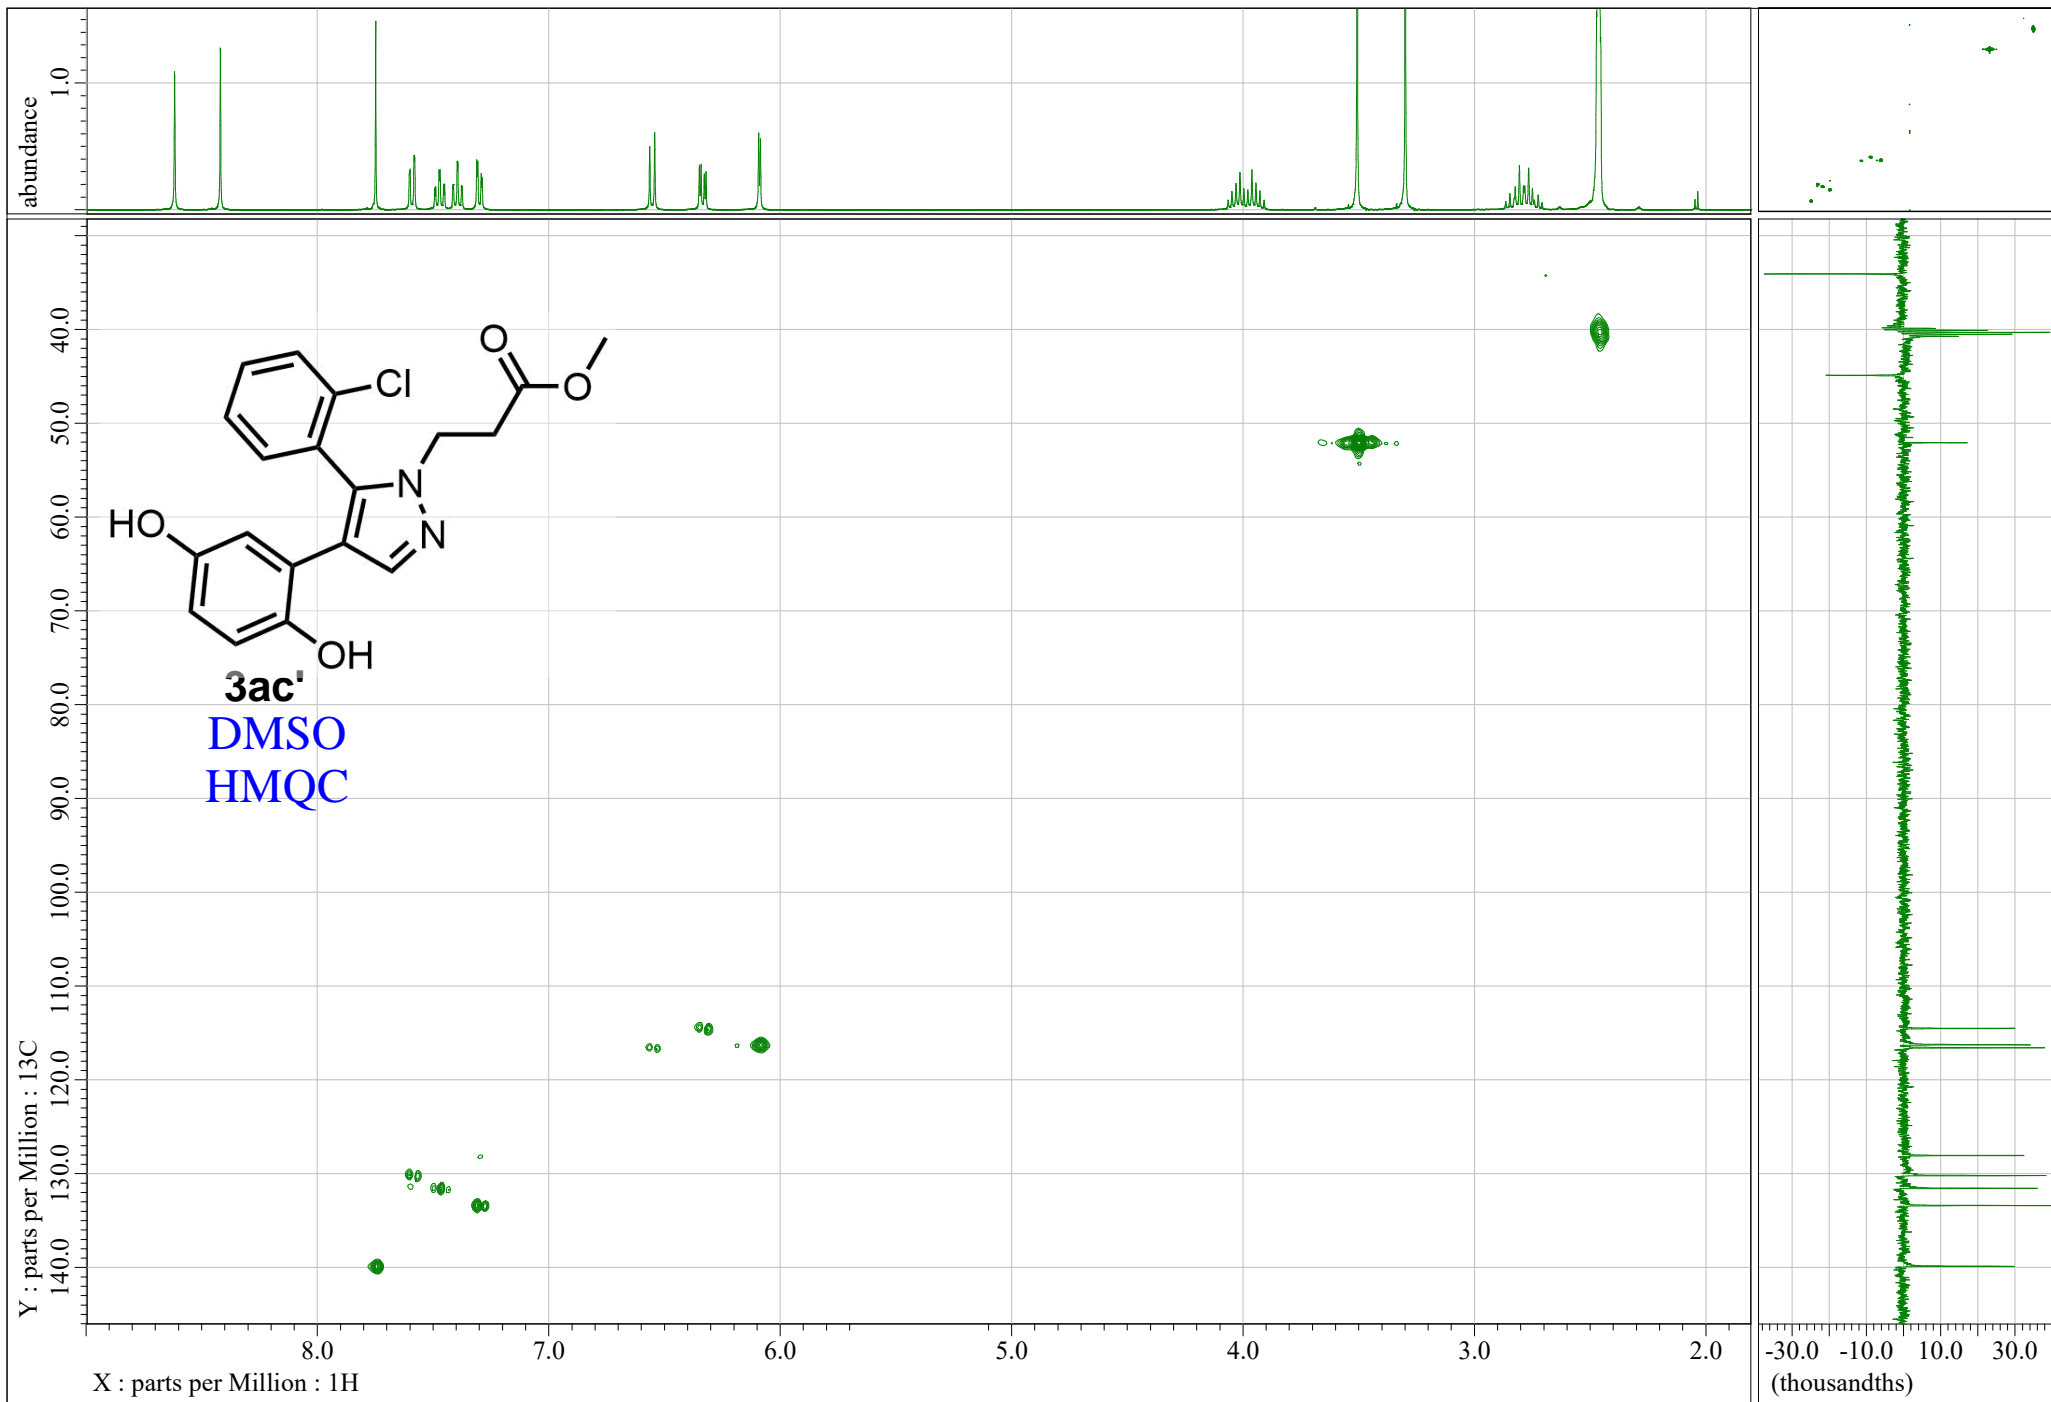

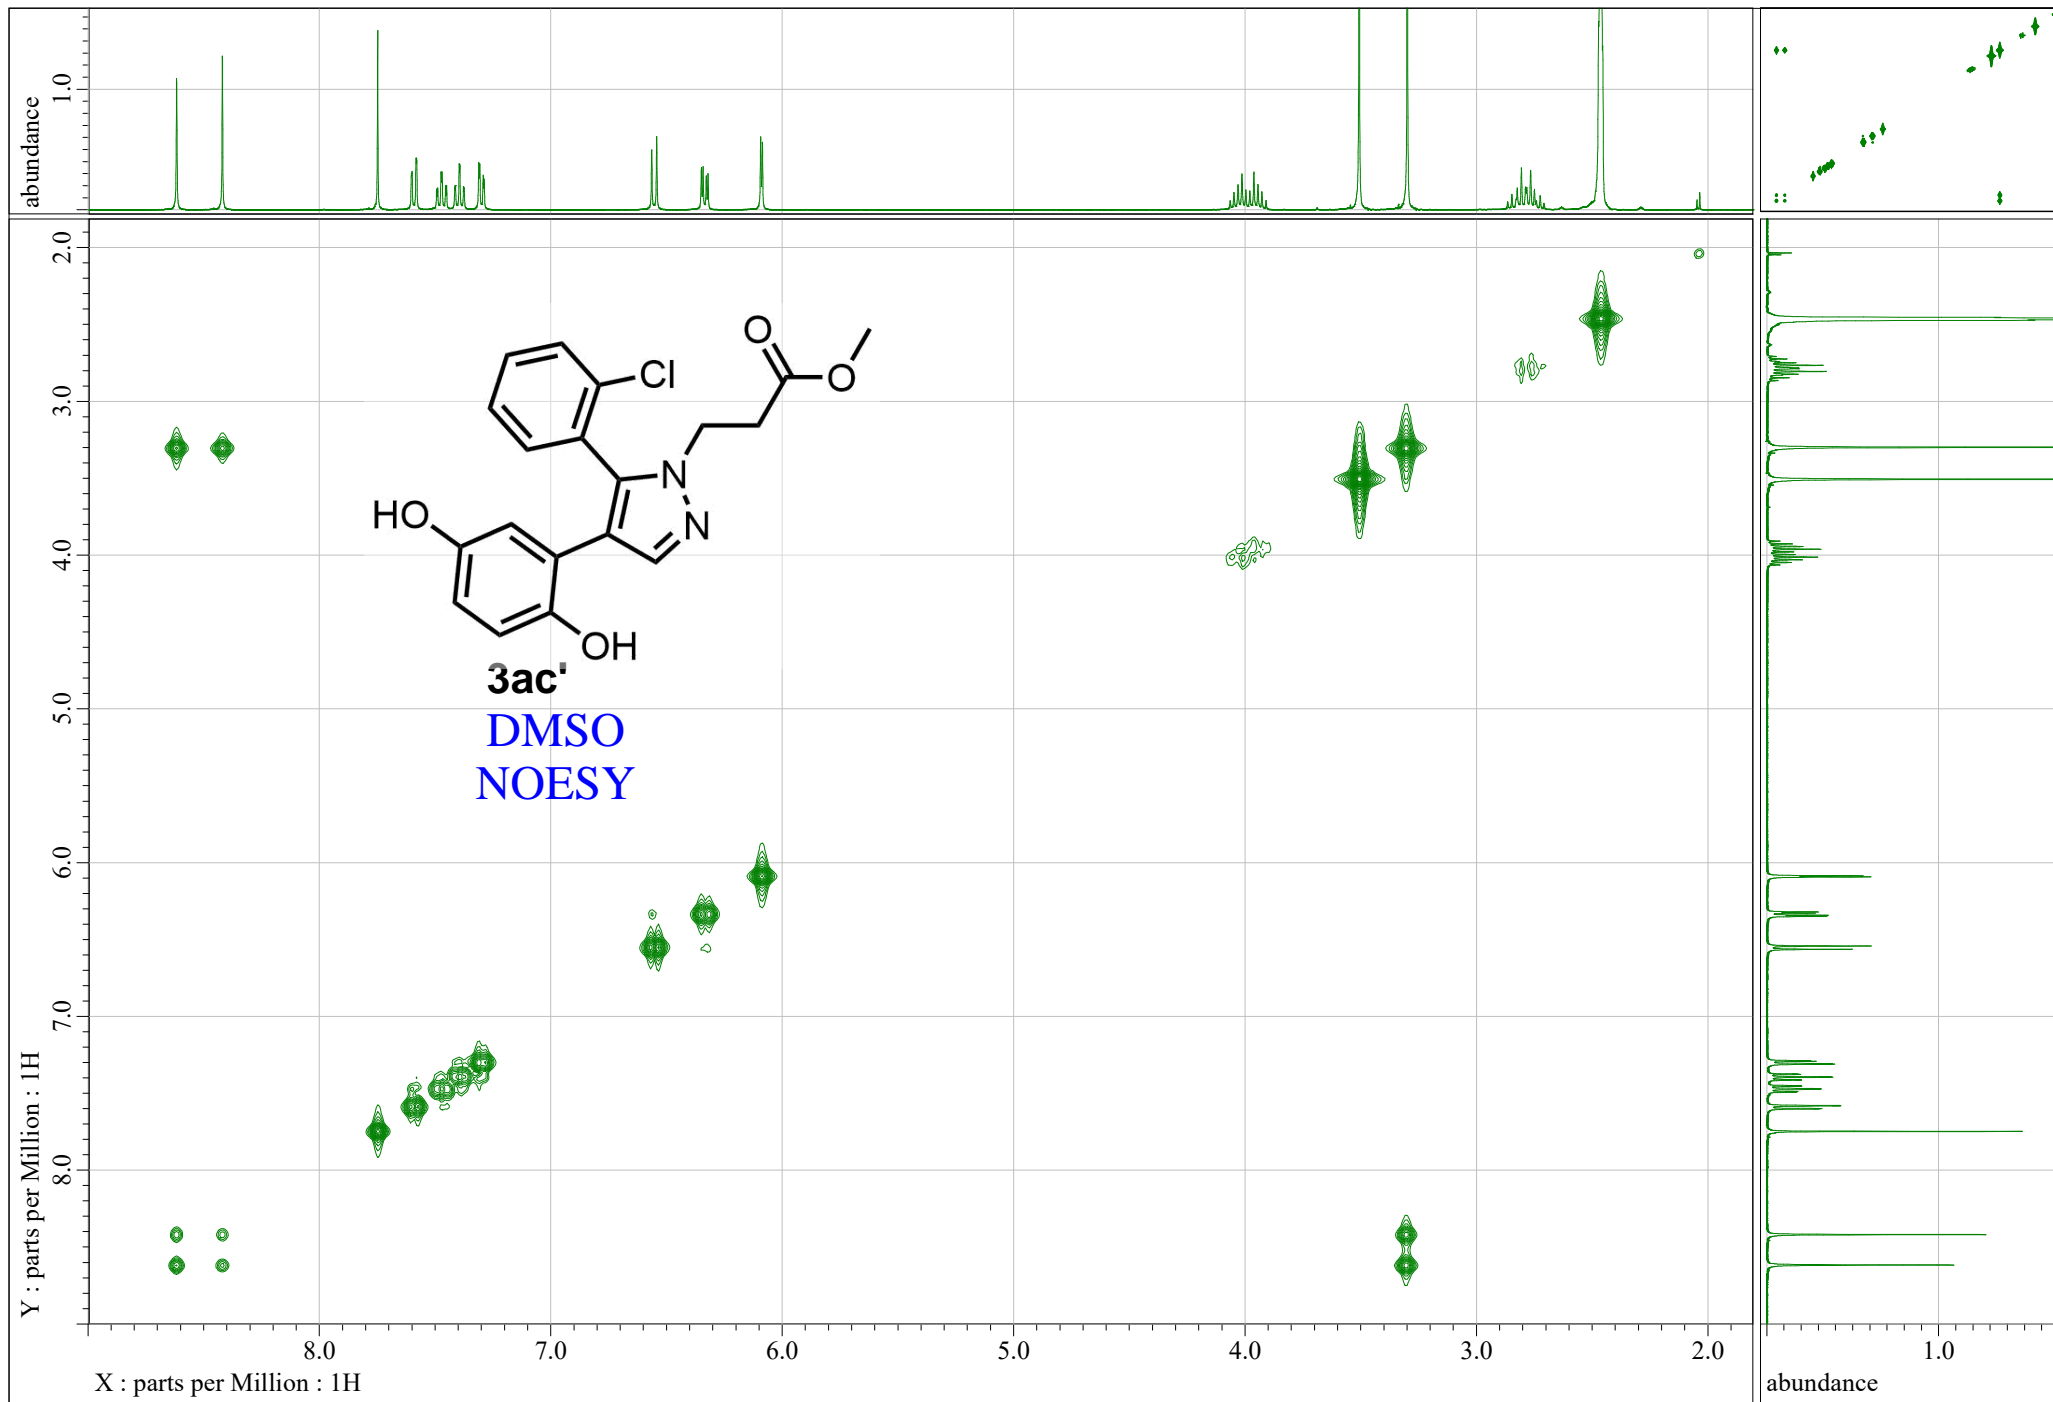

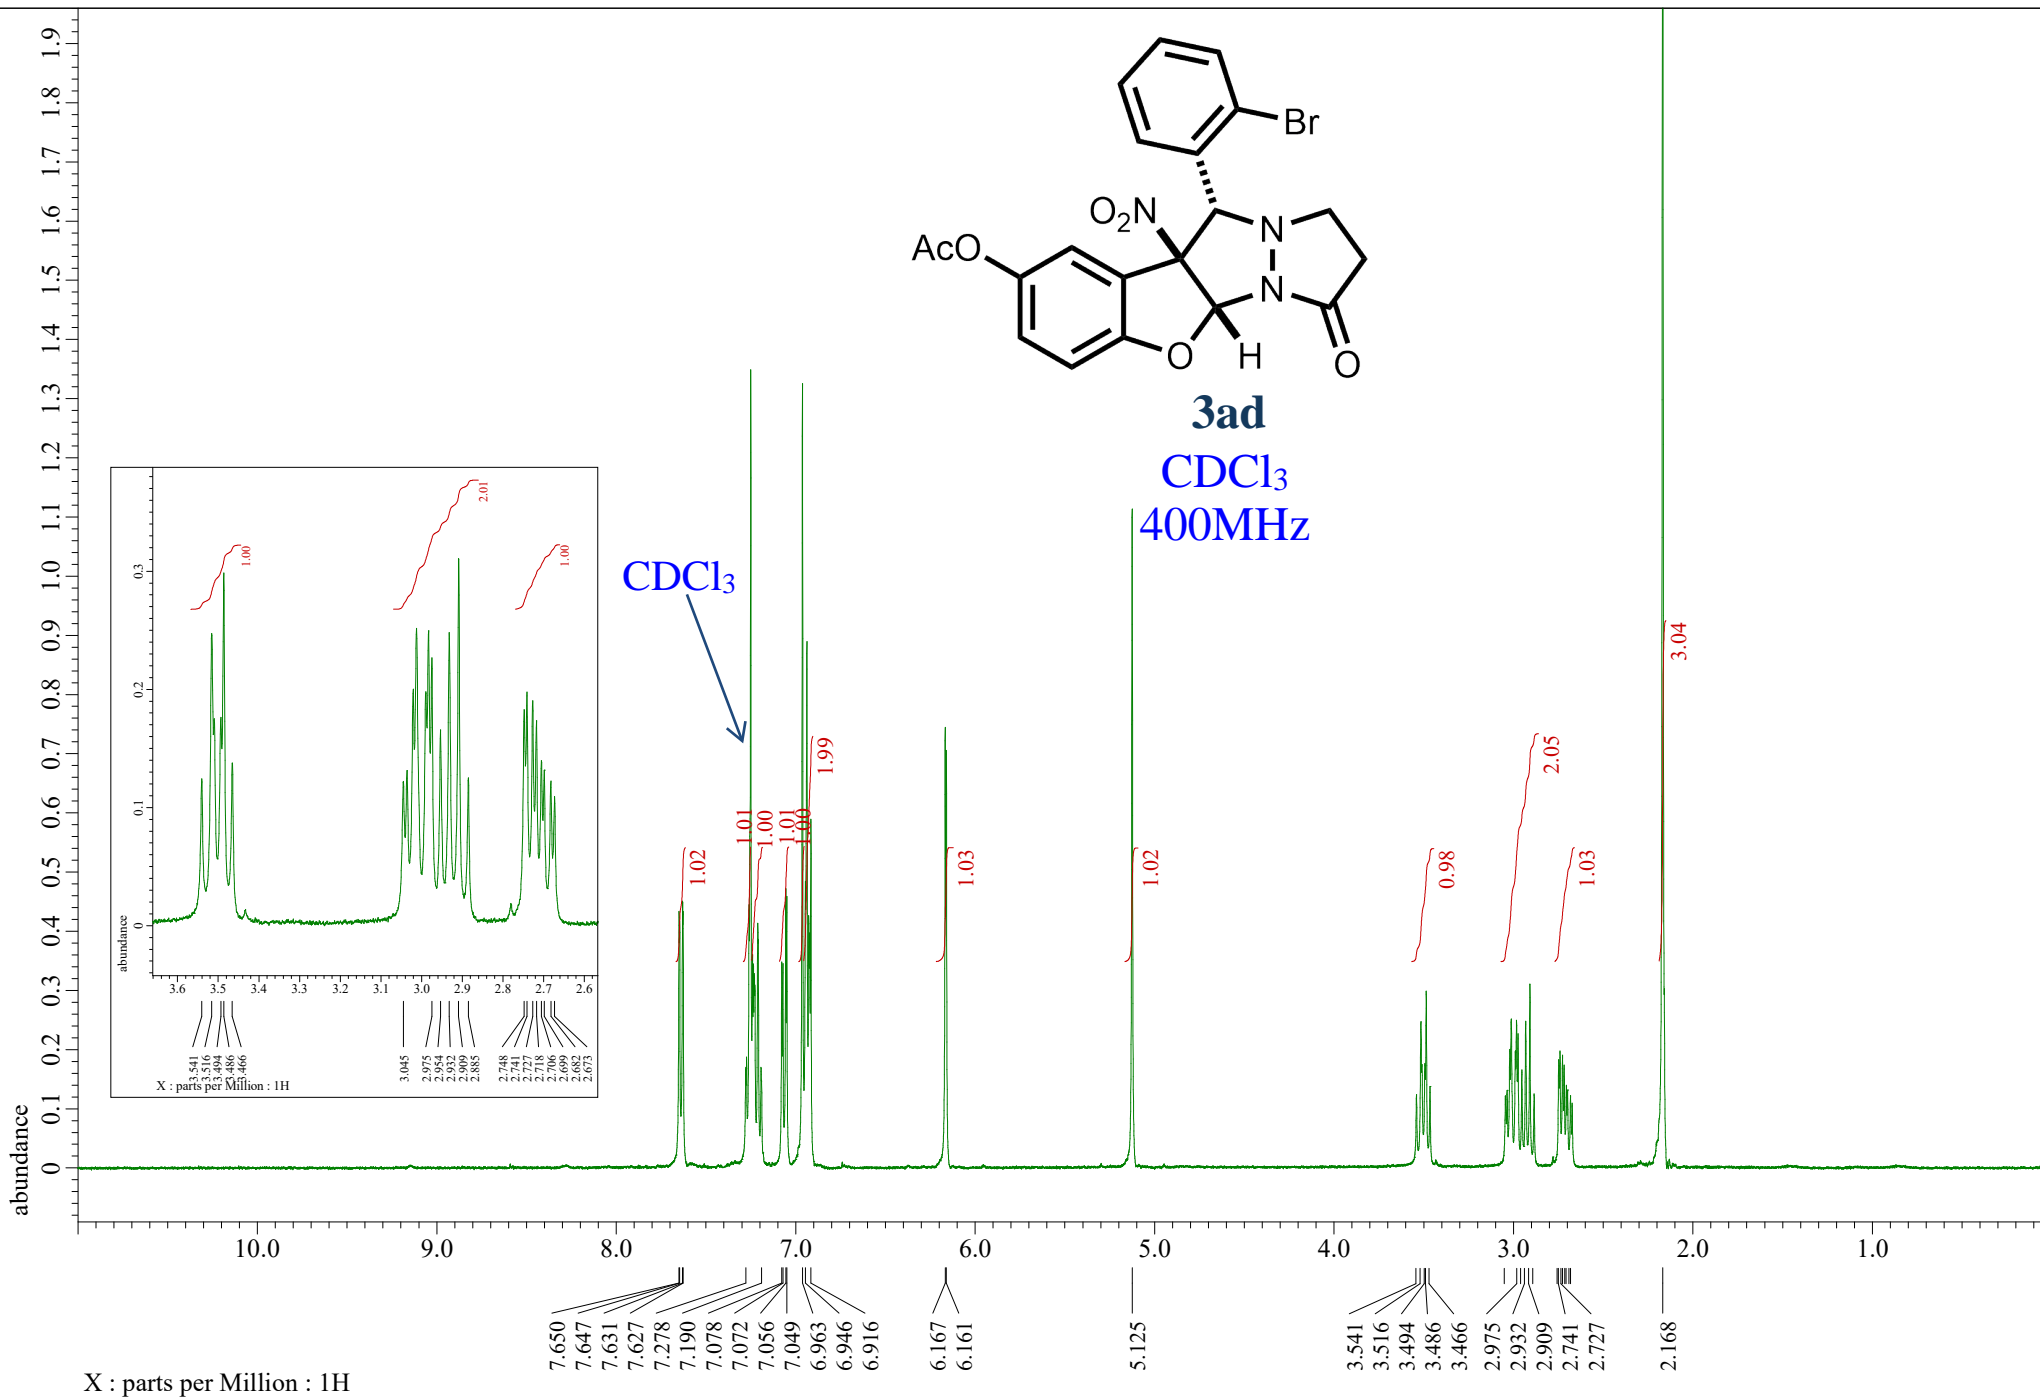



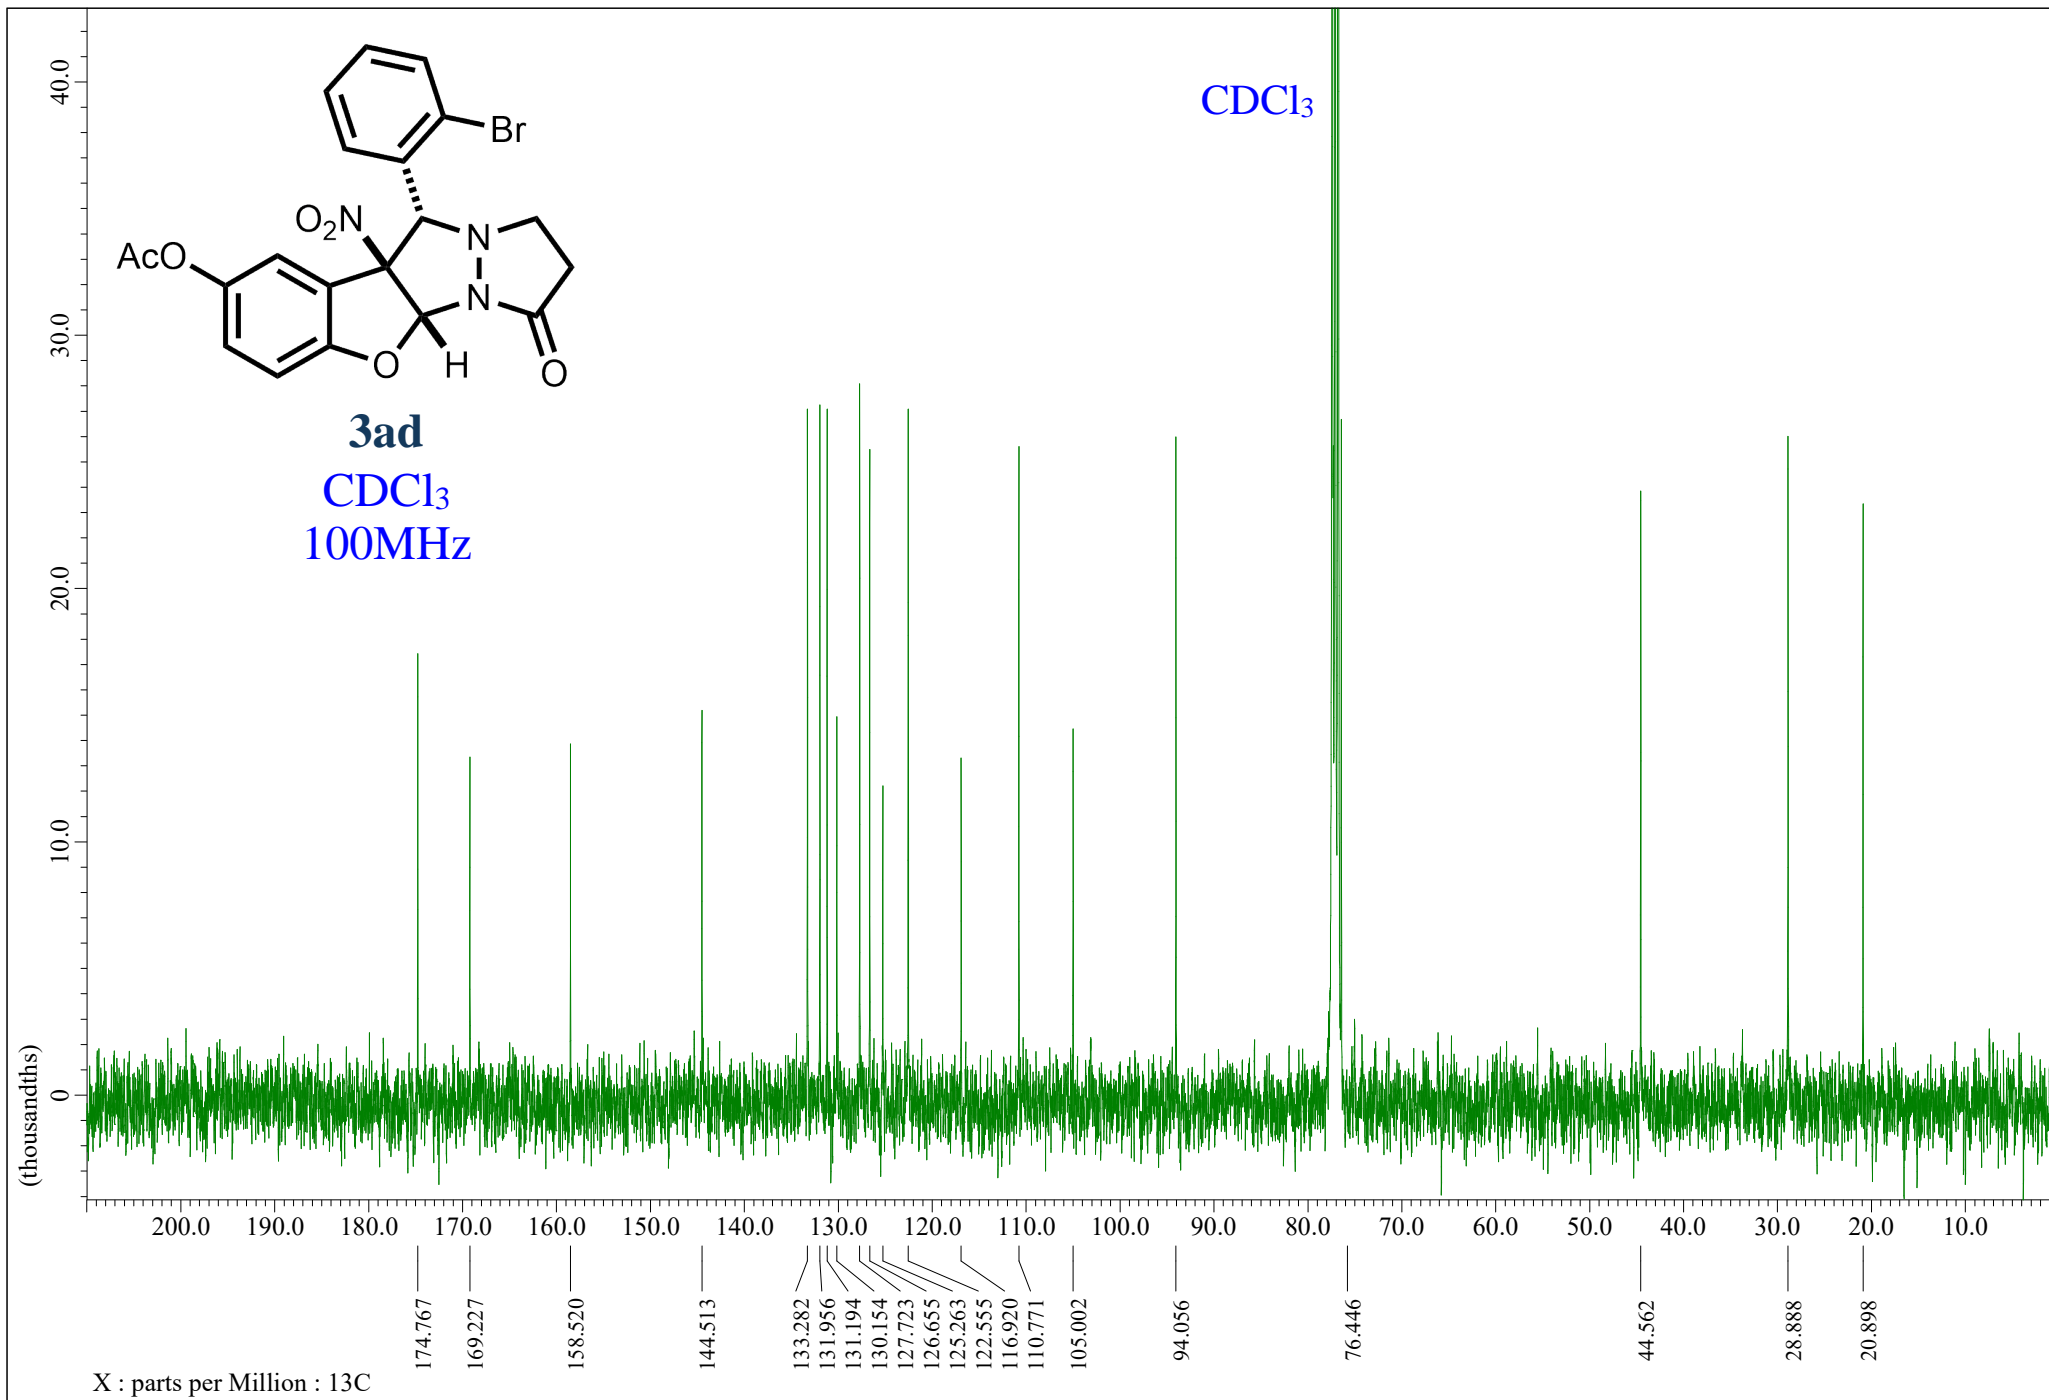

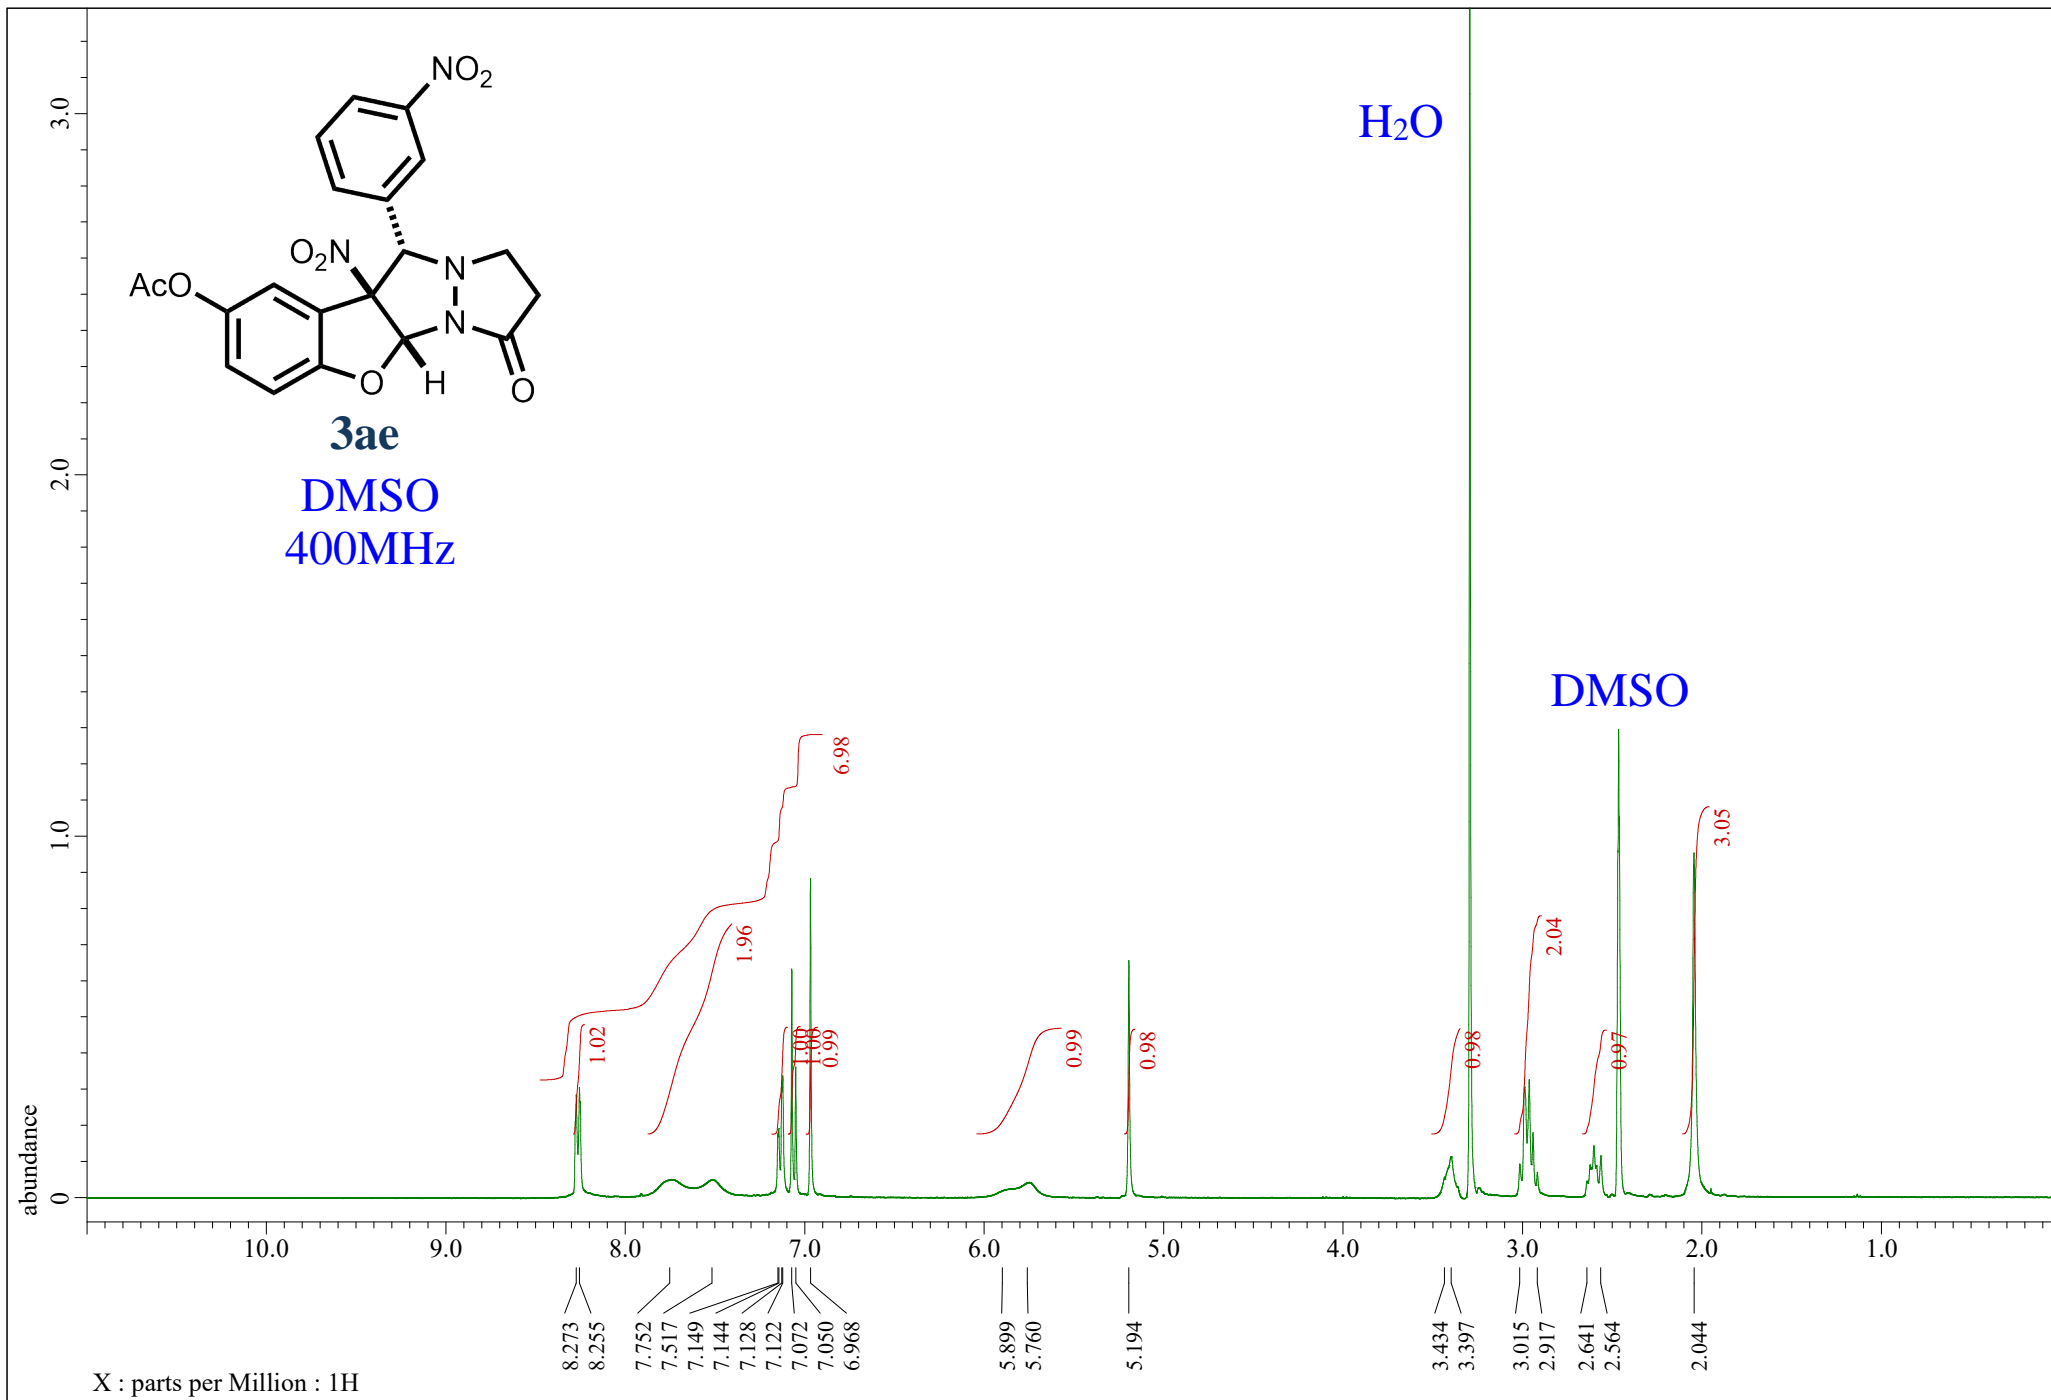

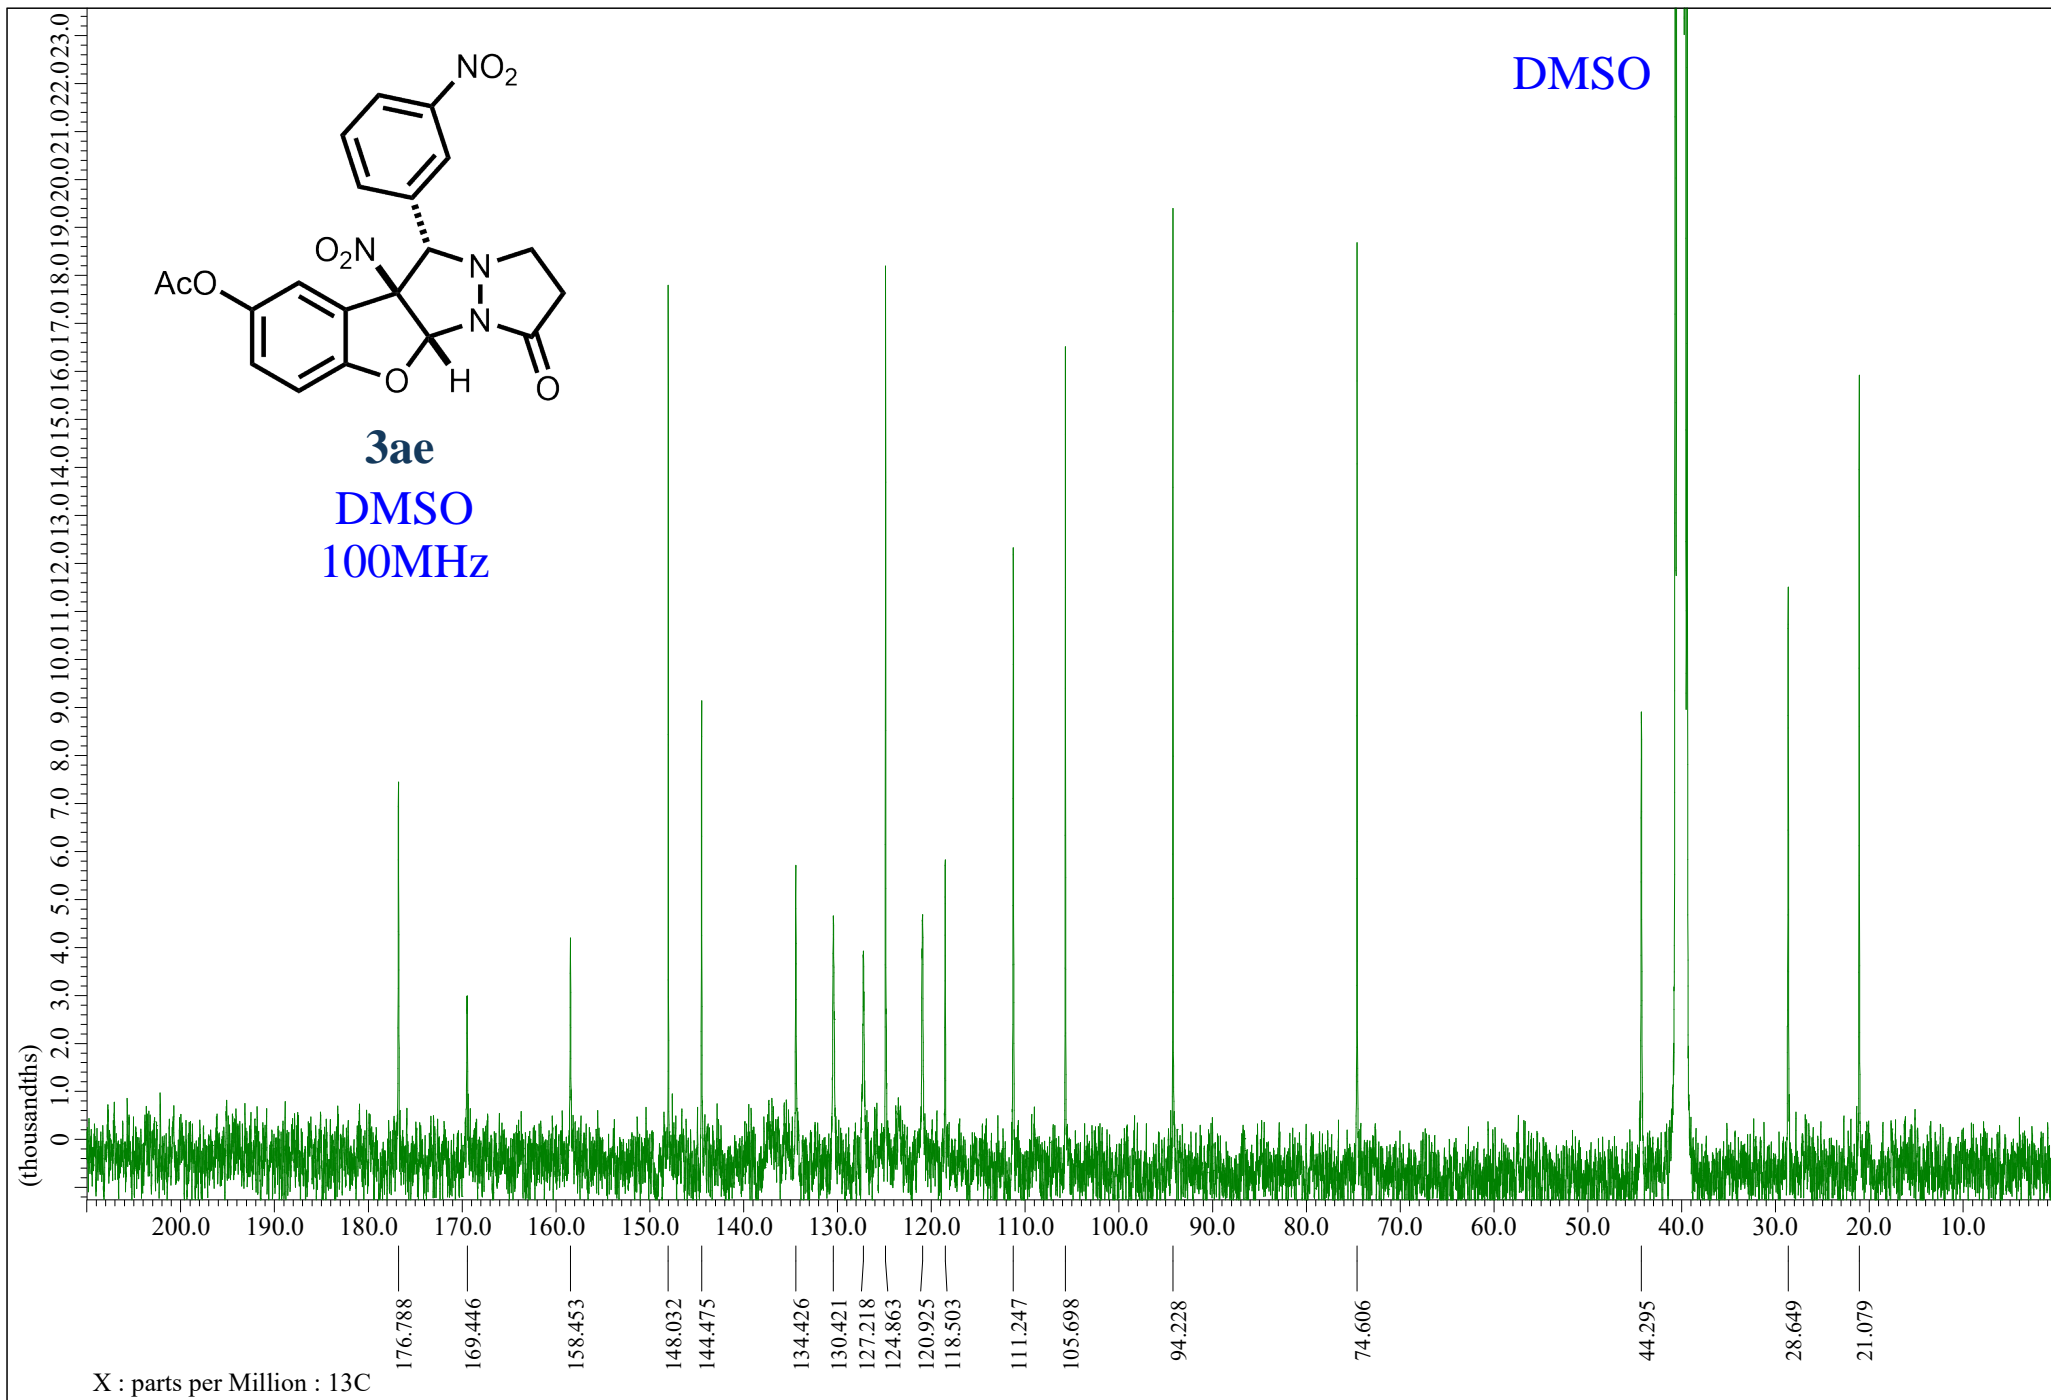

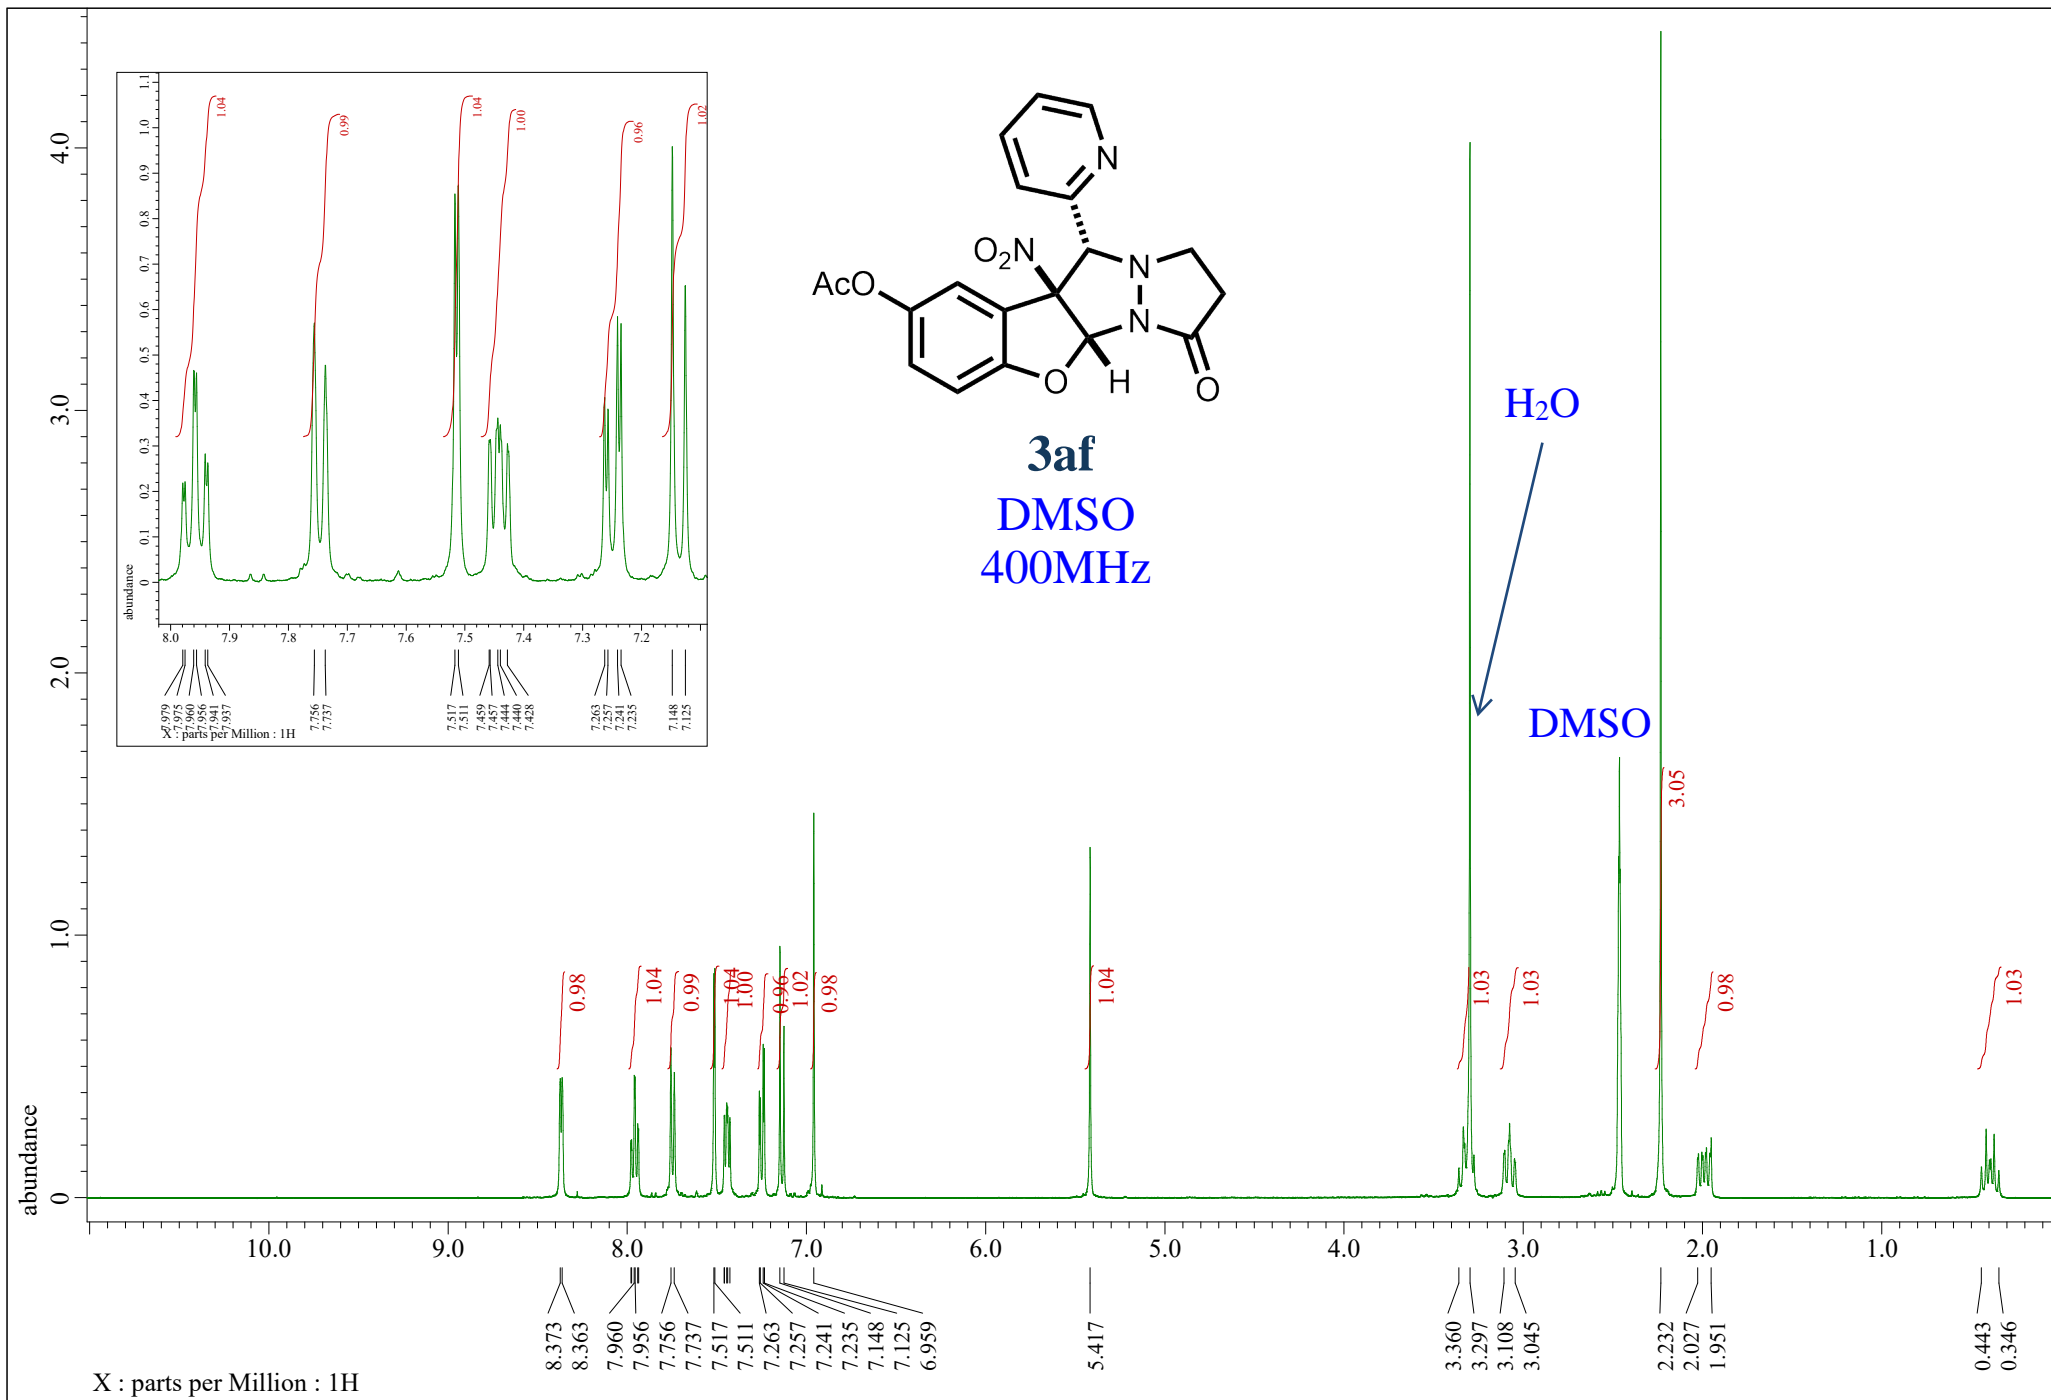

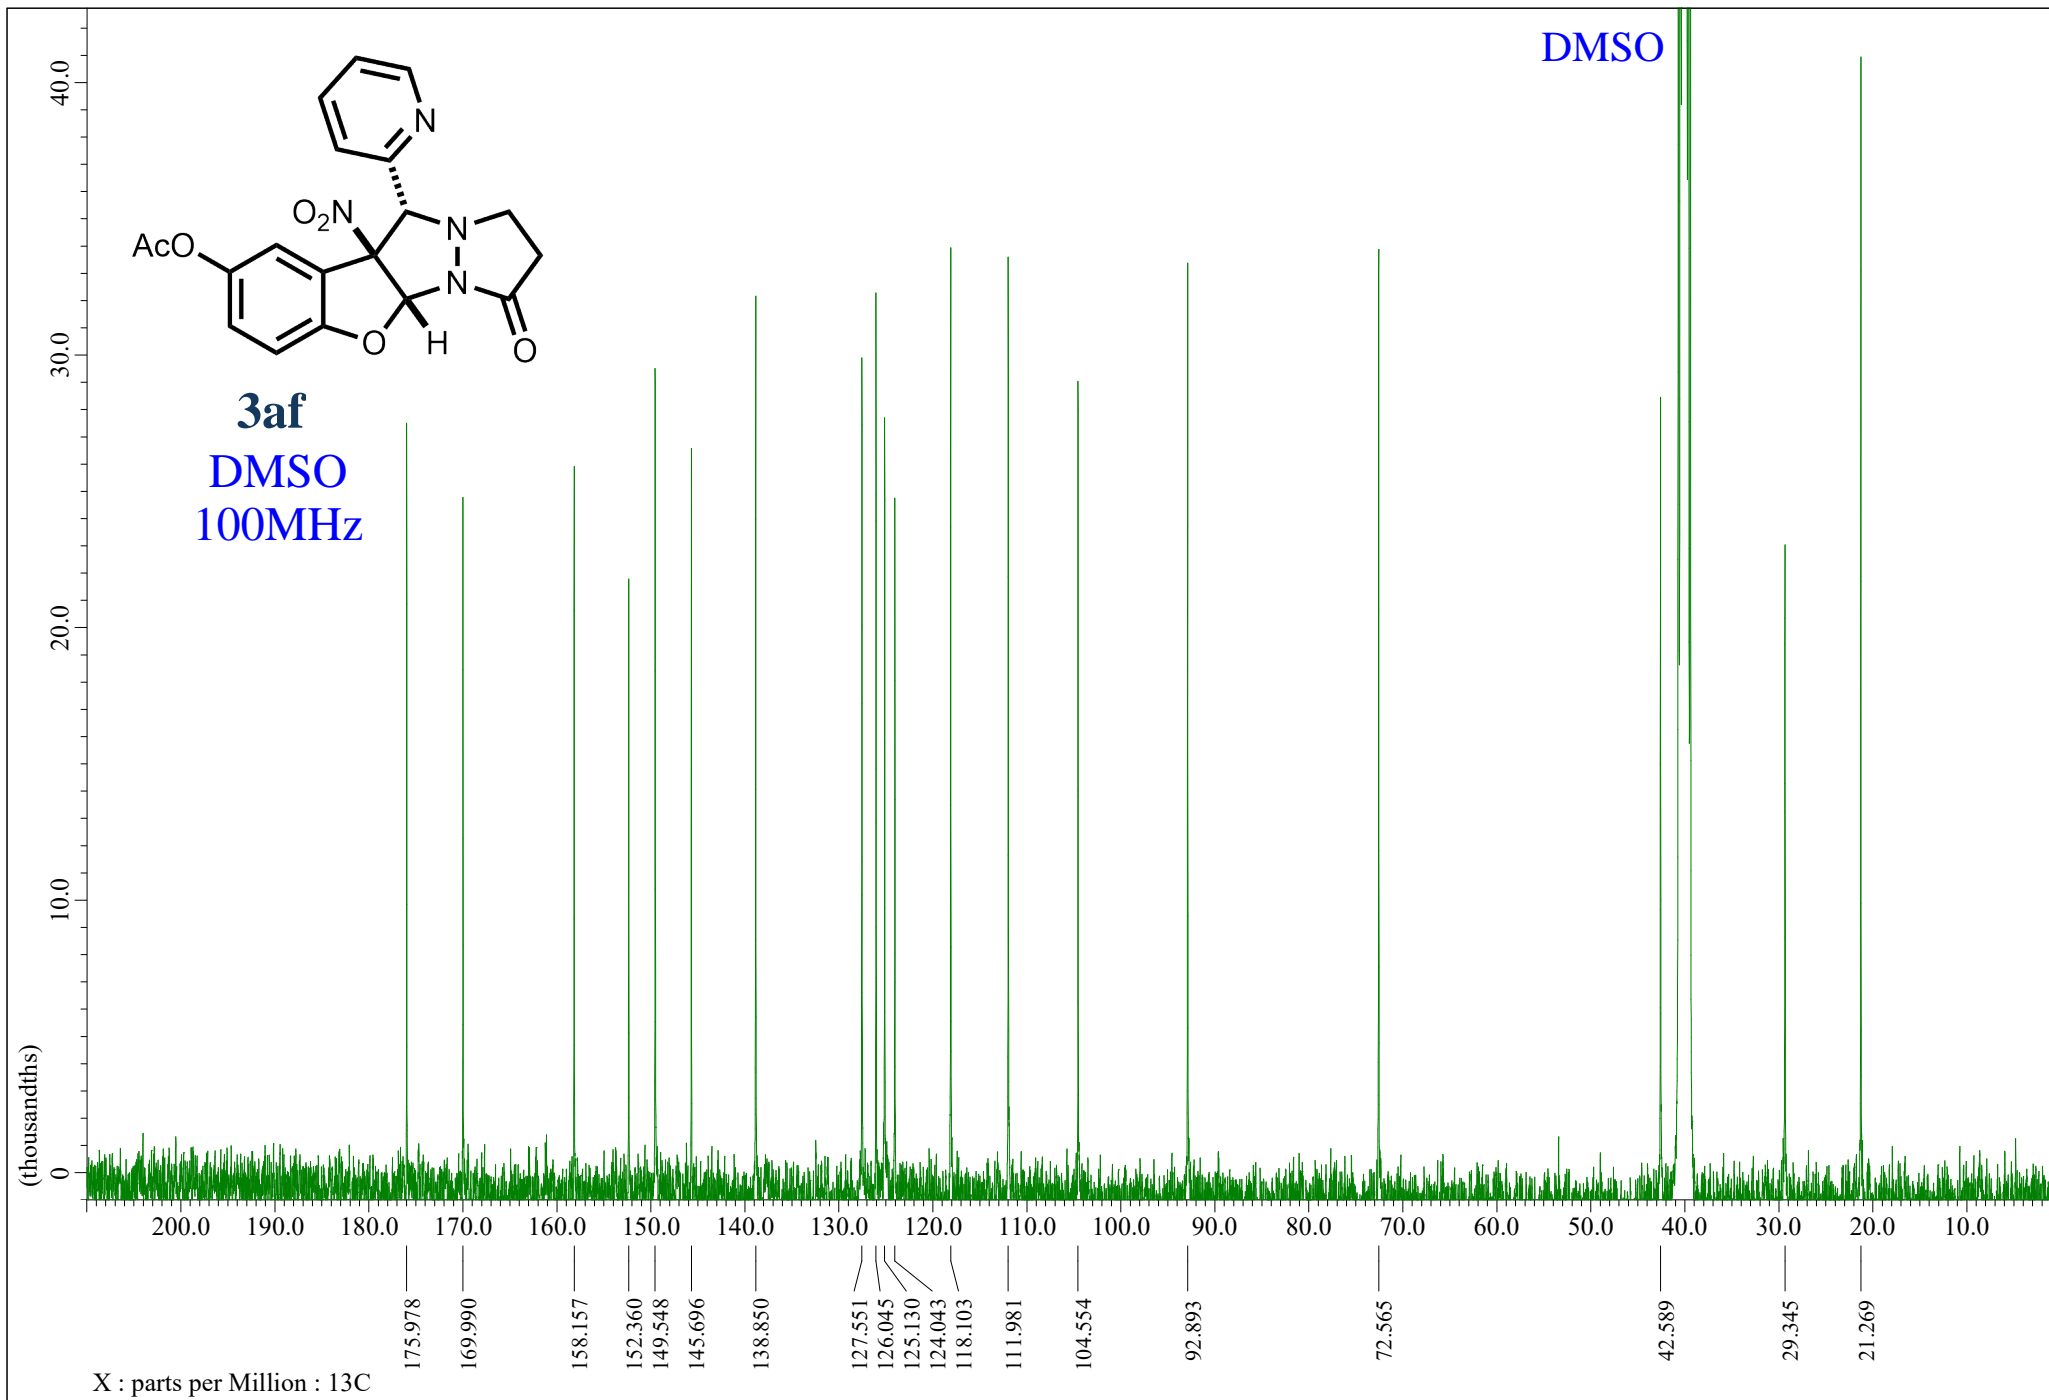

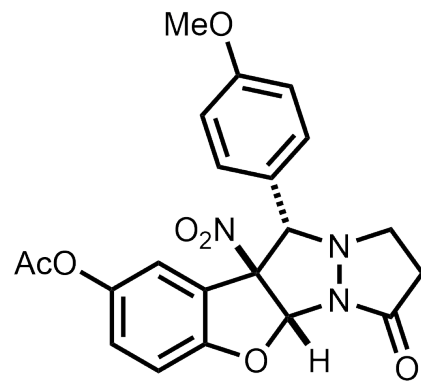

**3ah**

CDCl<sub>3</sub>  
400MHz

CDCl<sub>3</sub>

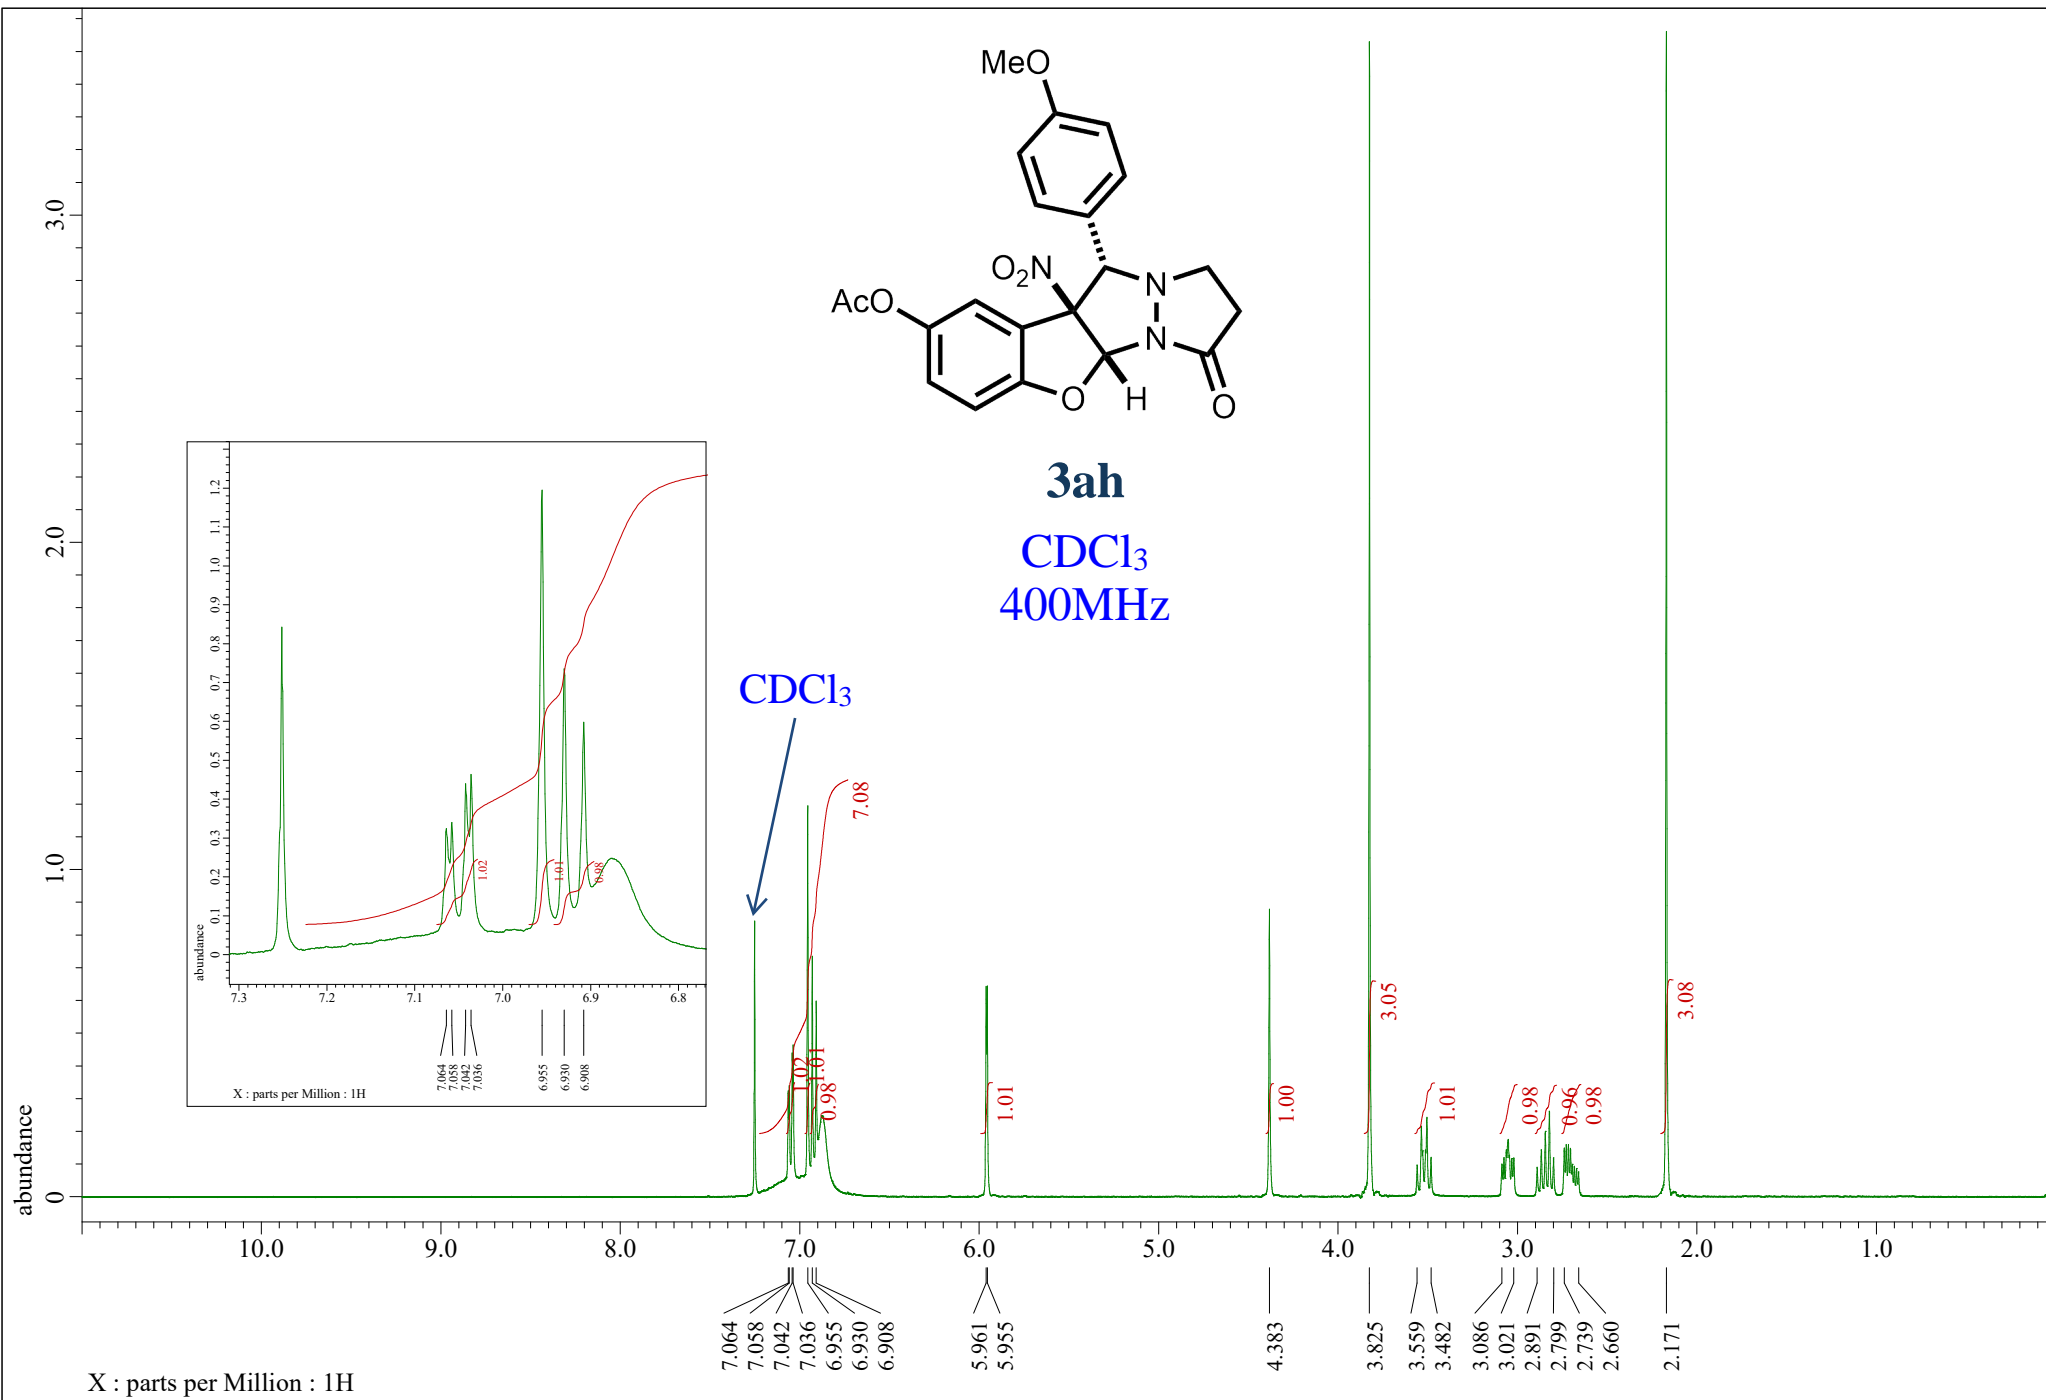

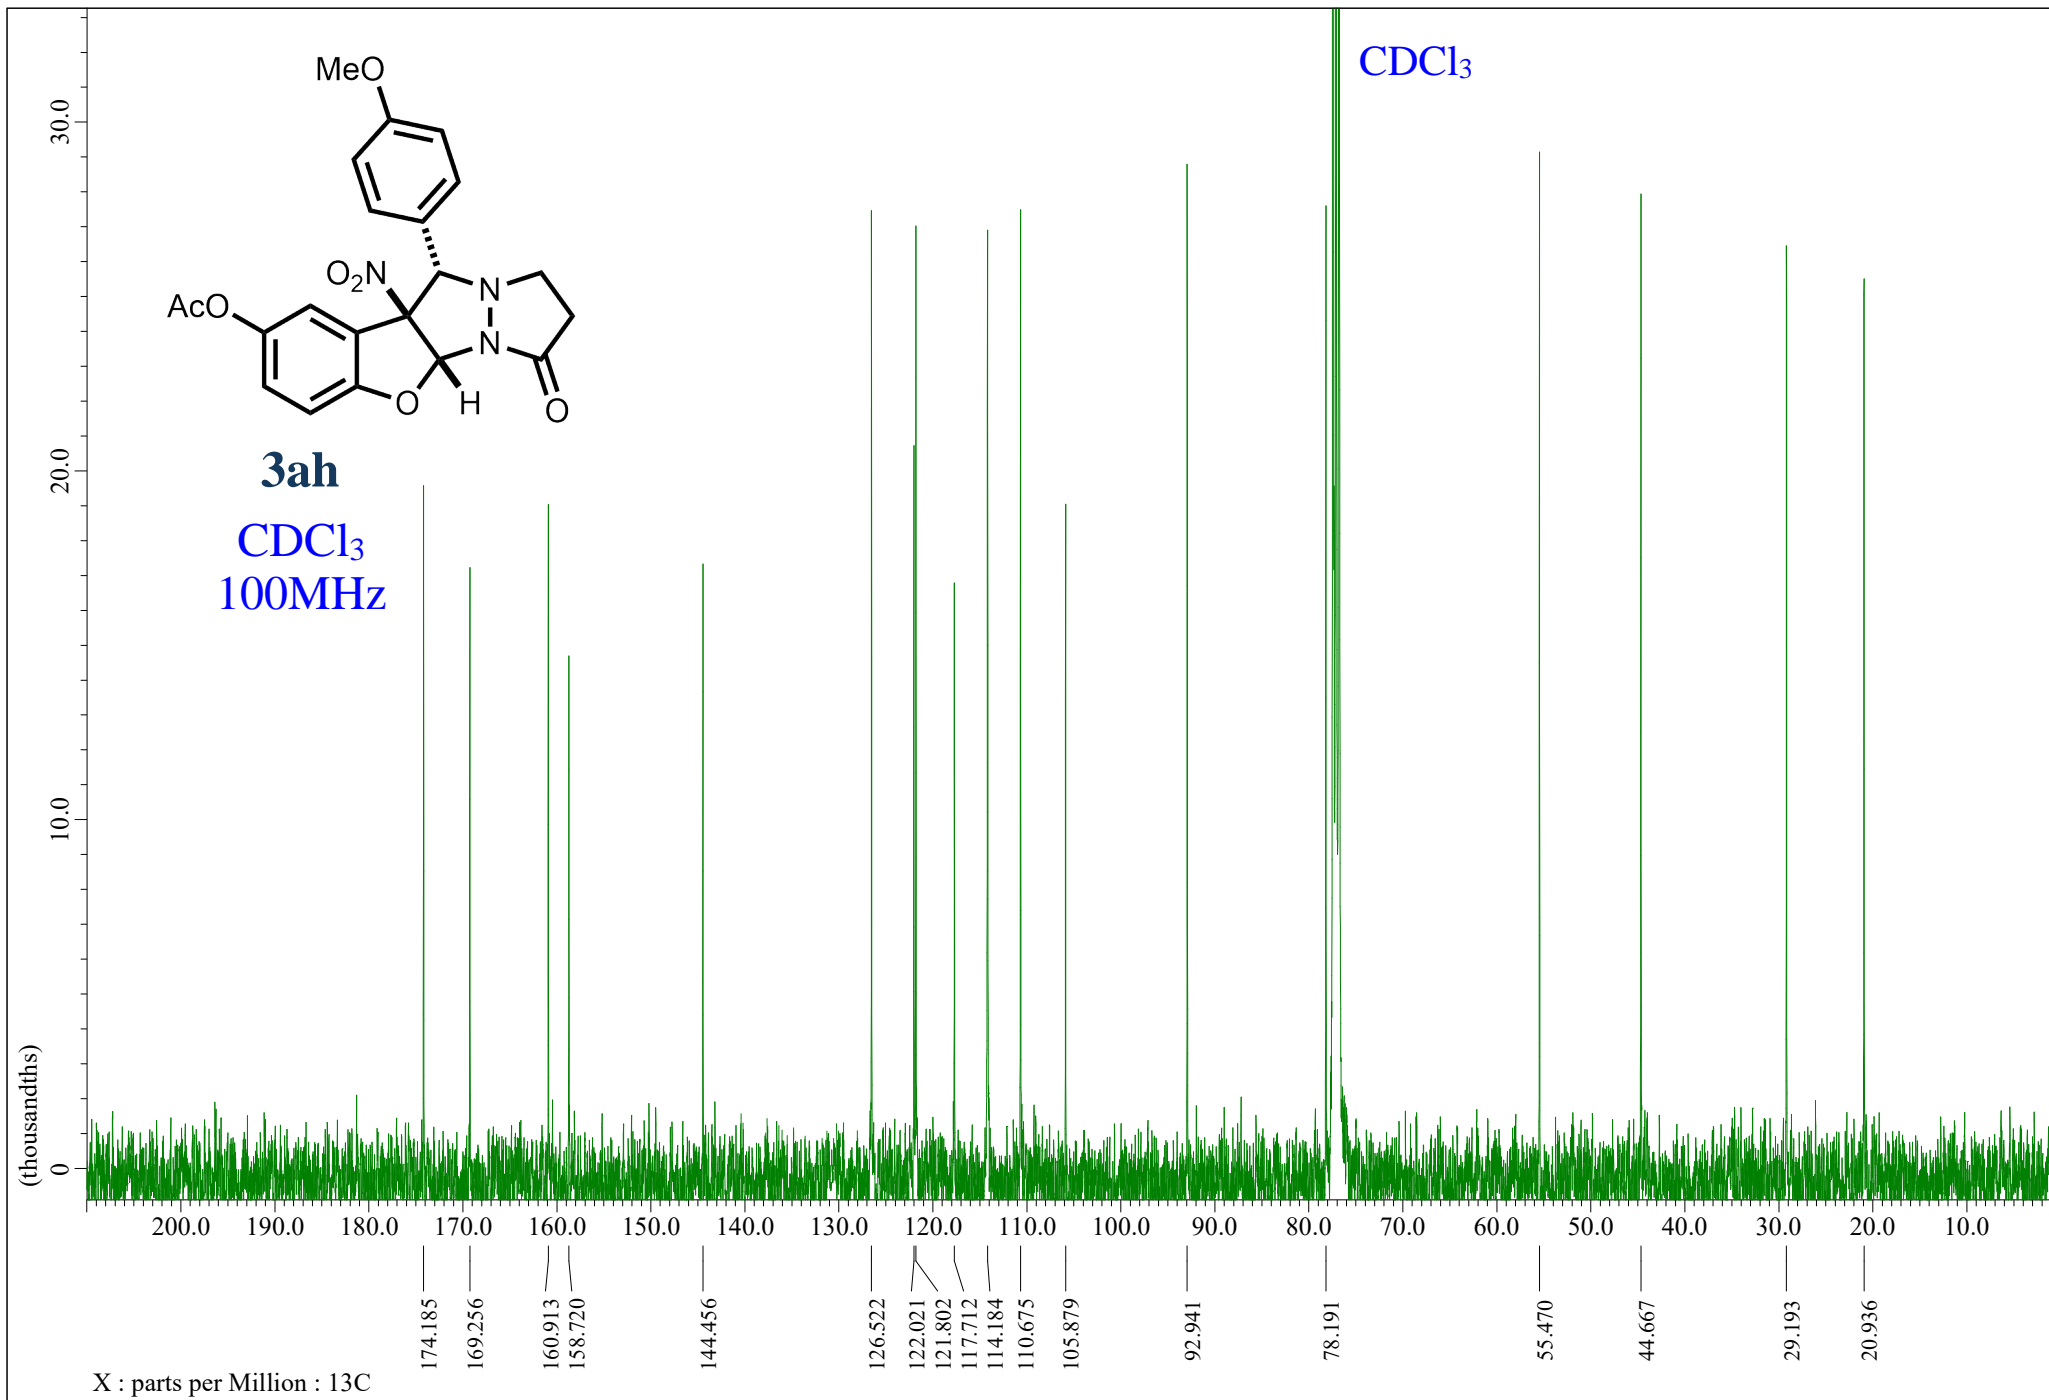

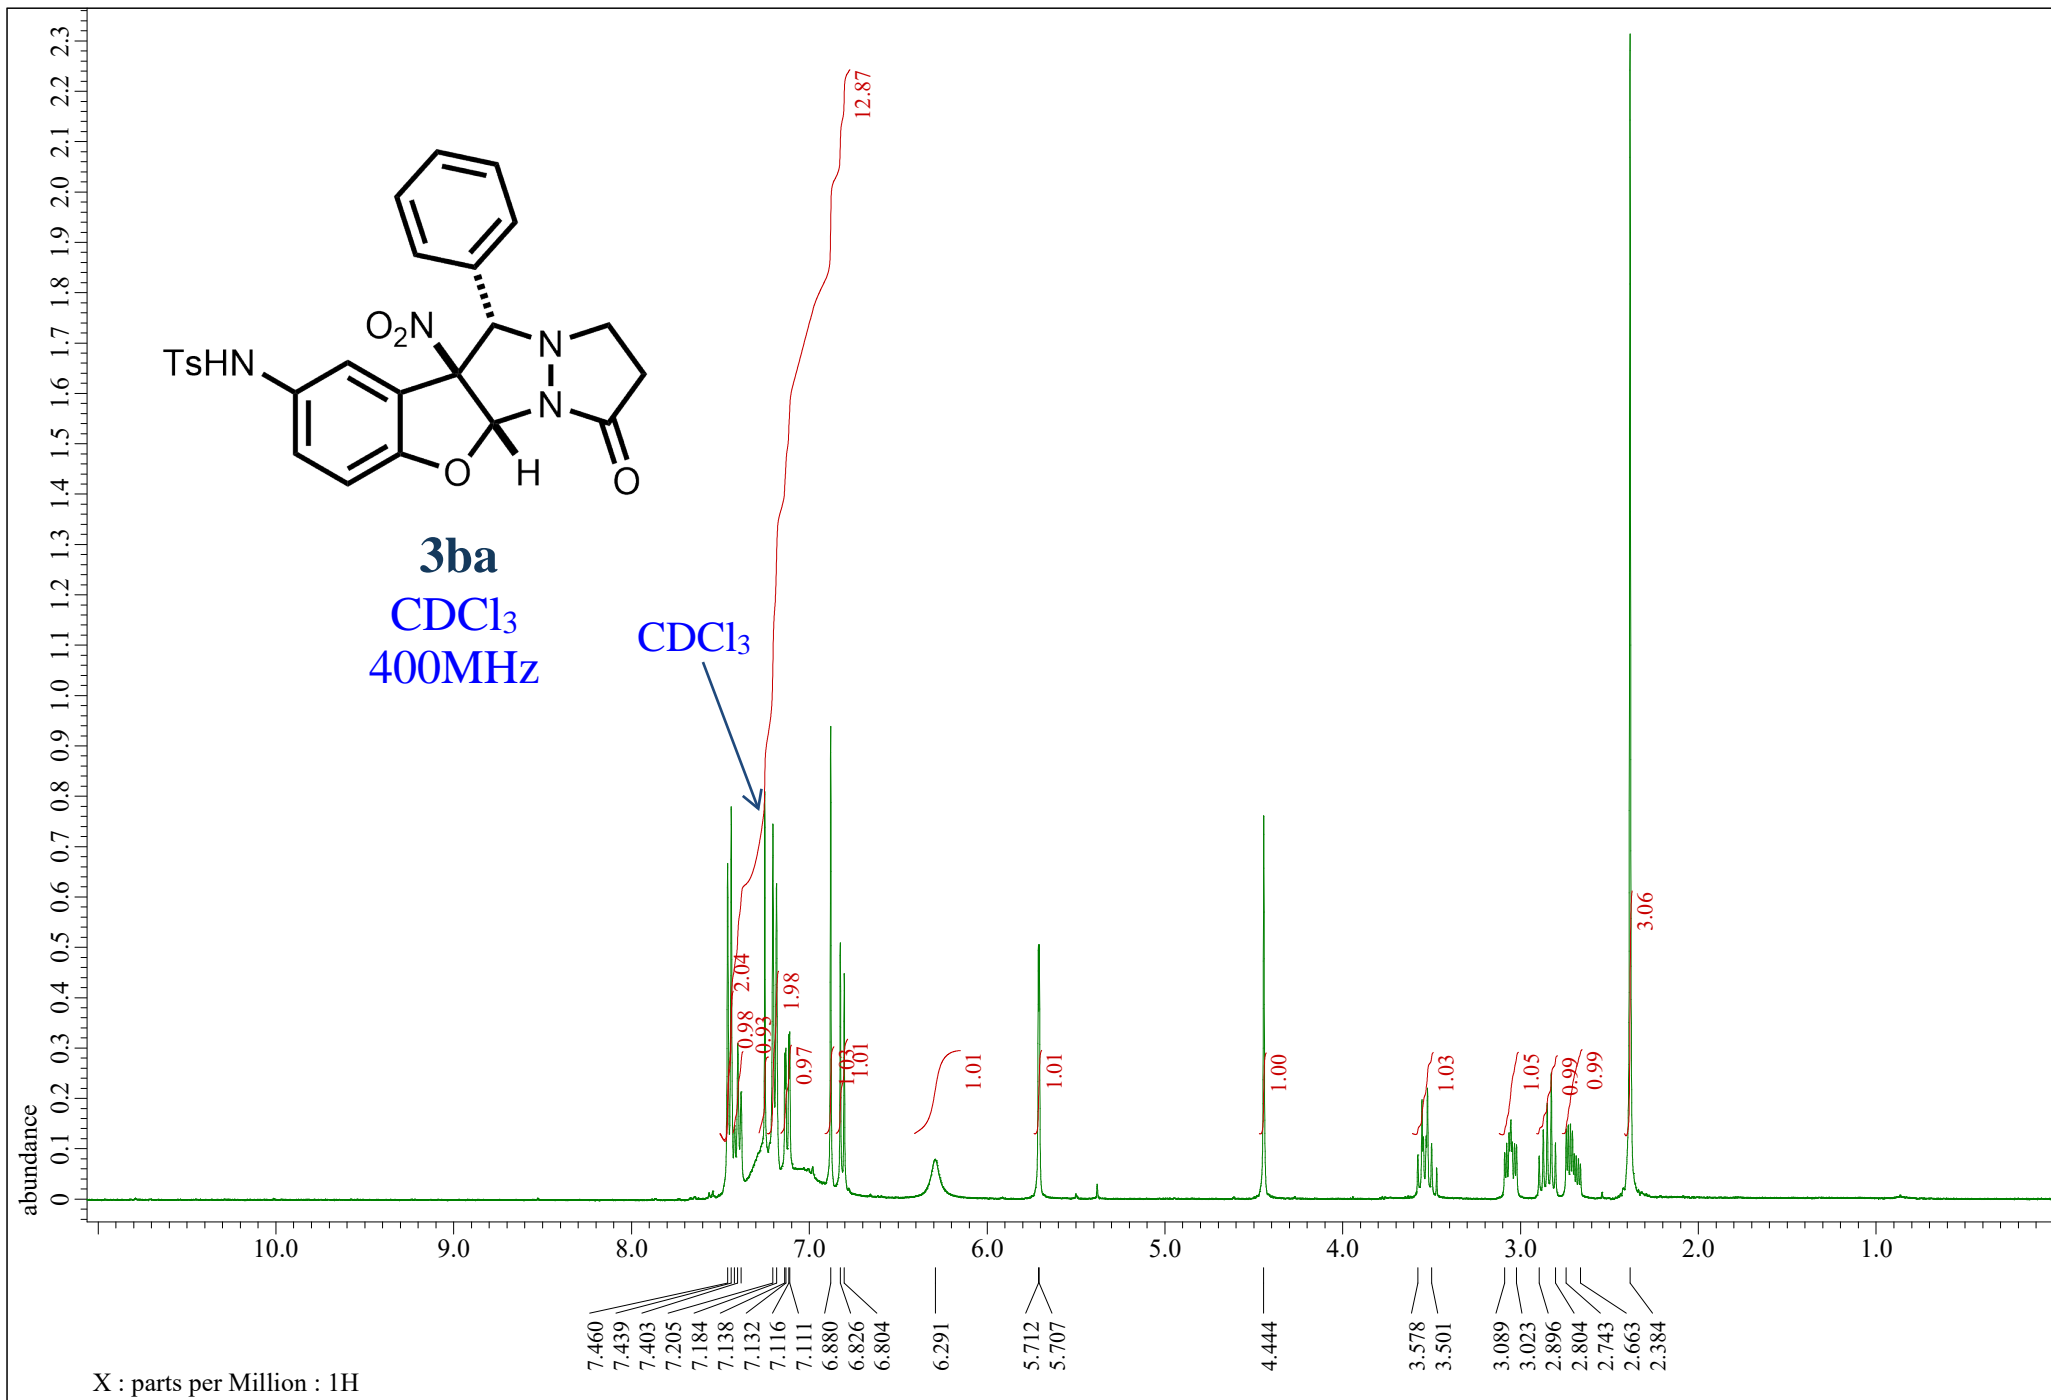



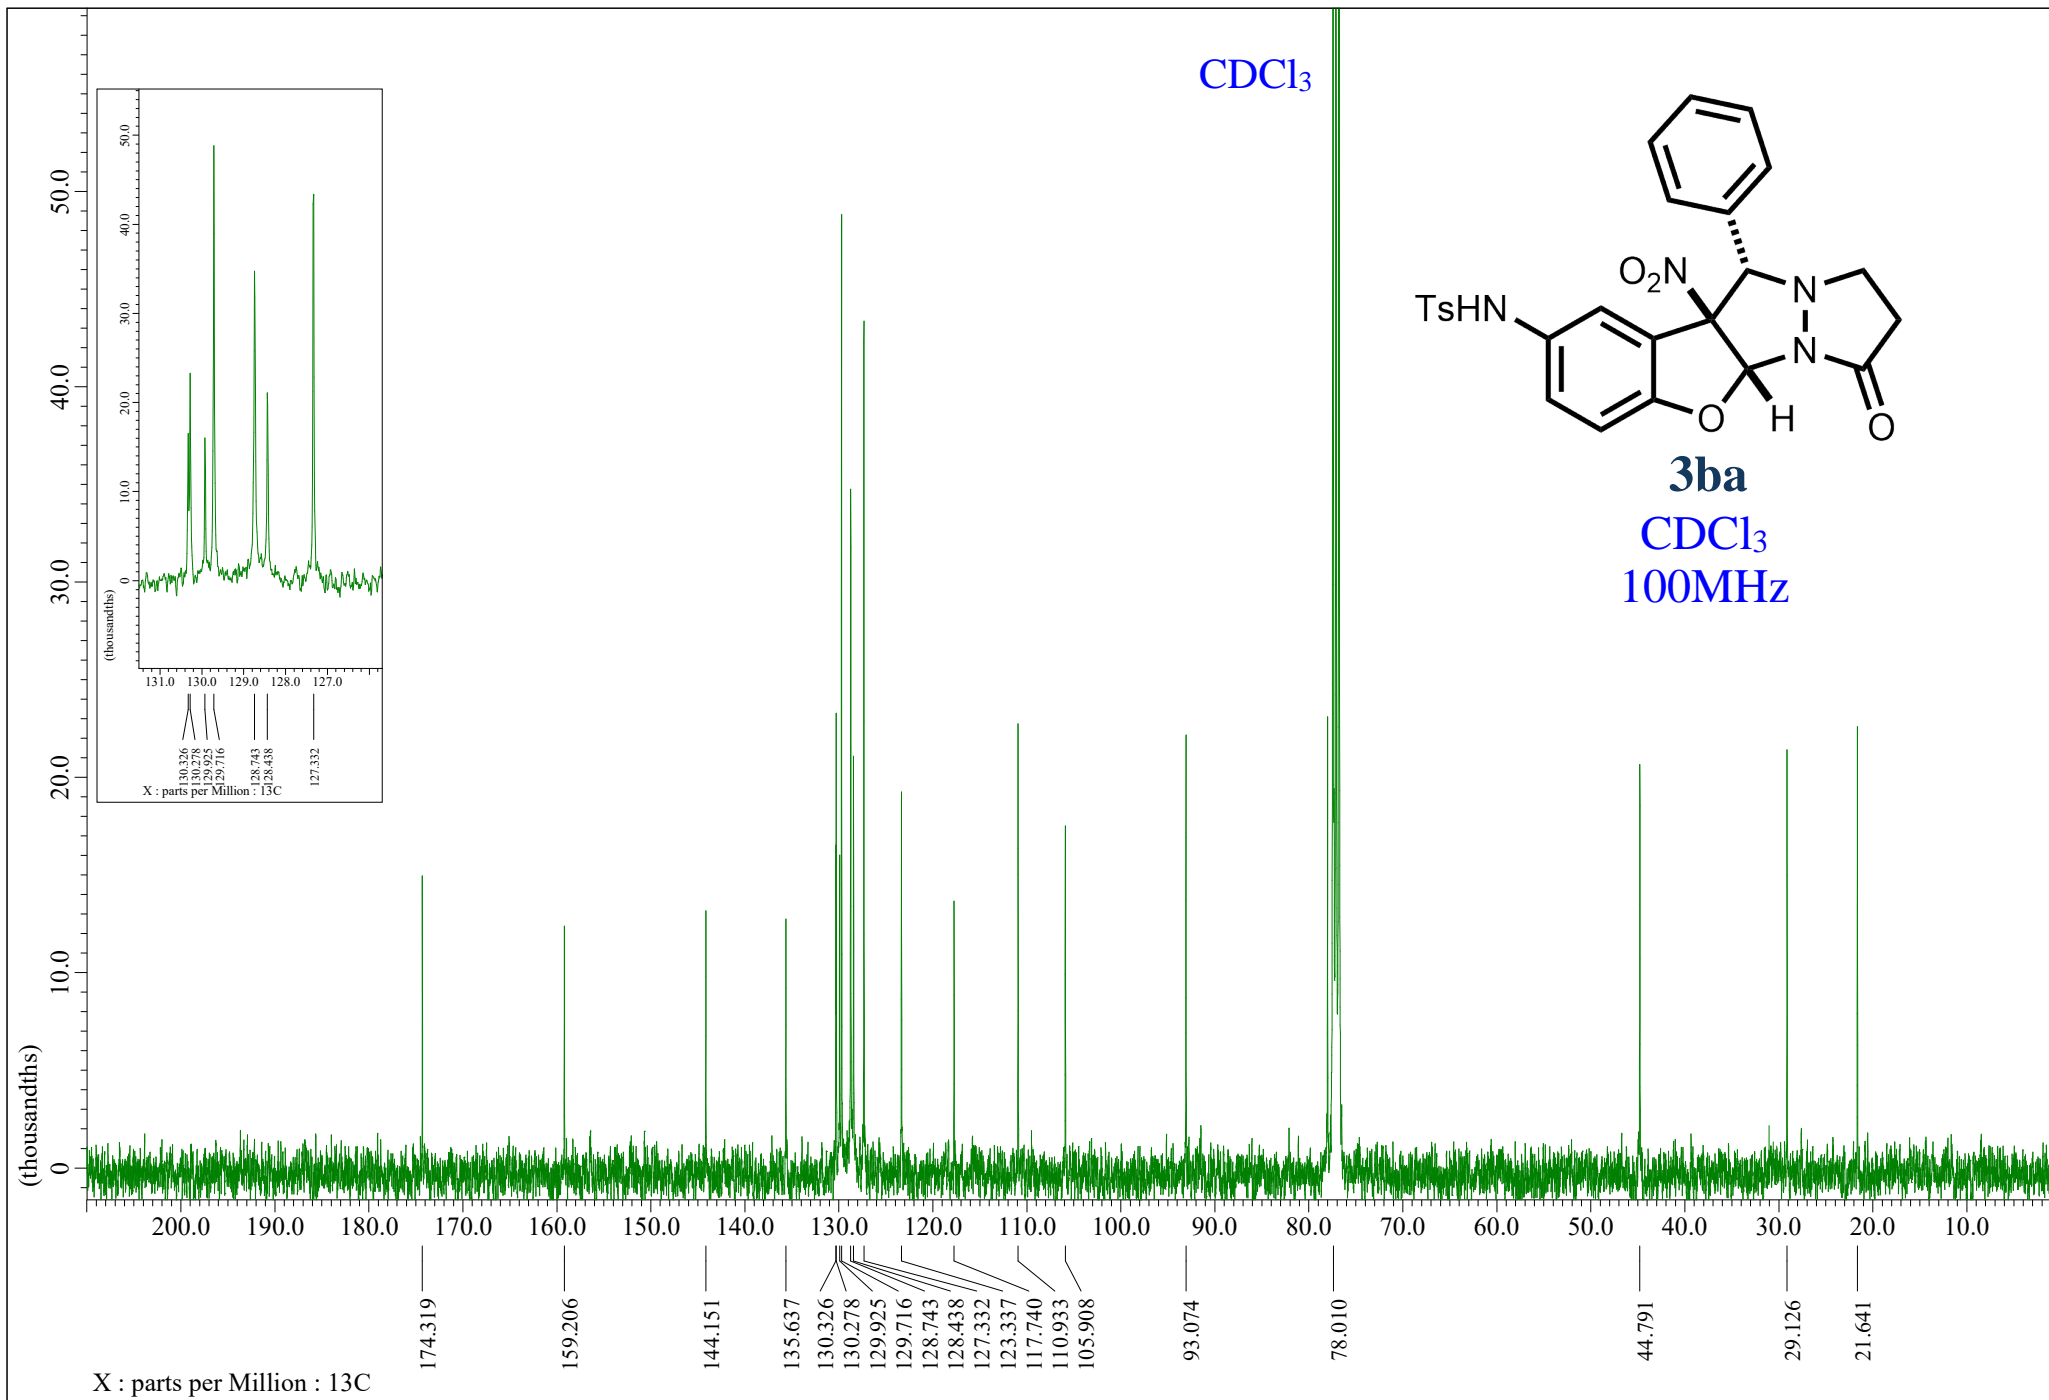

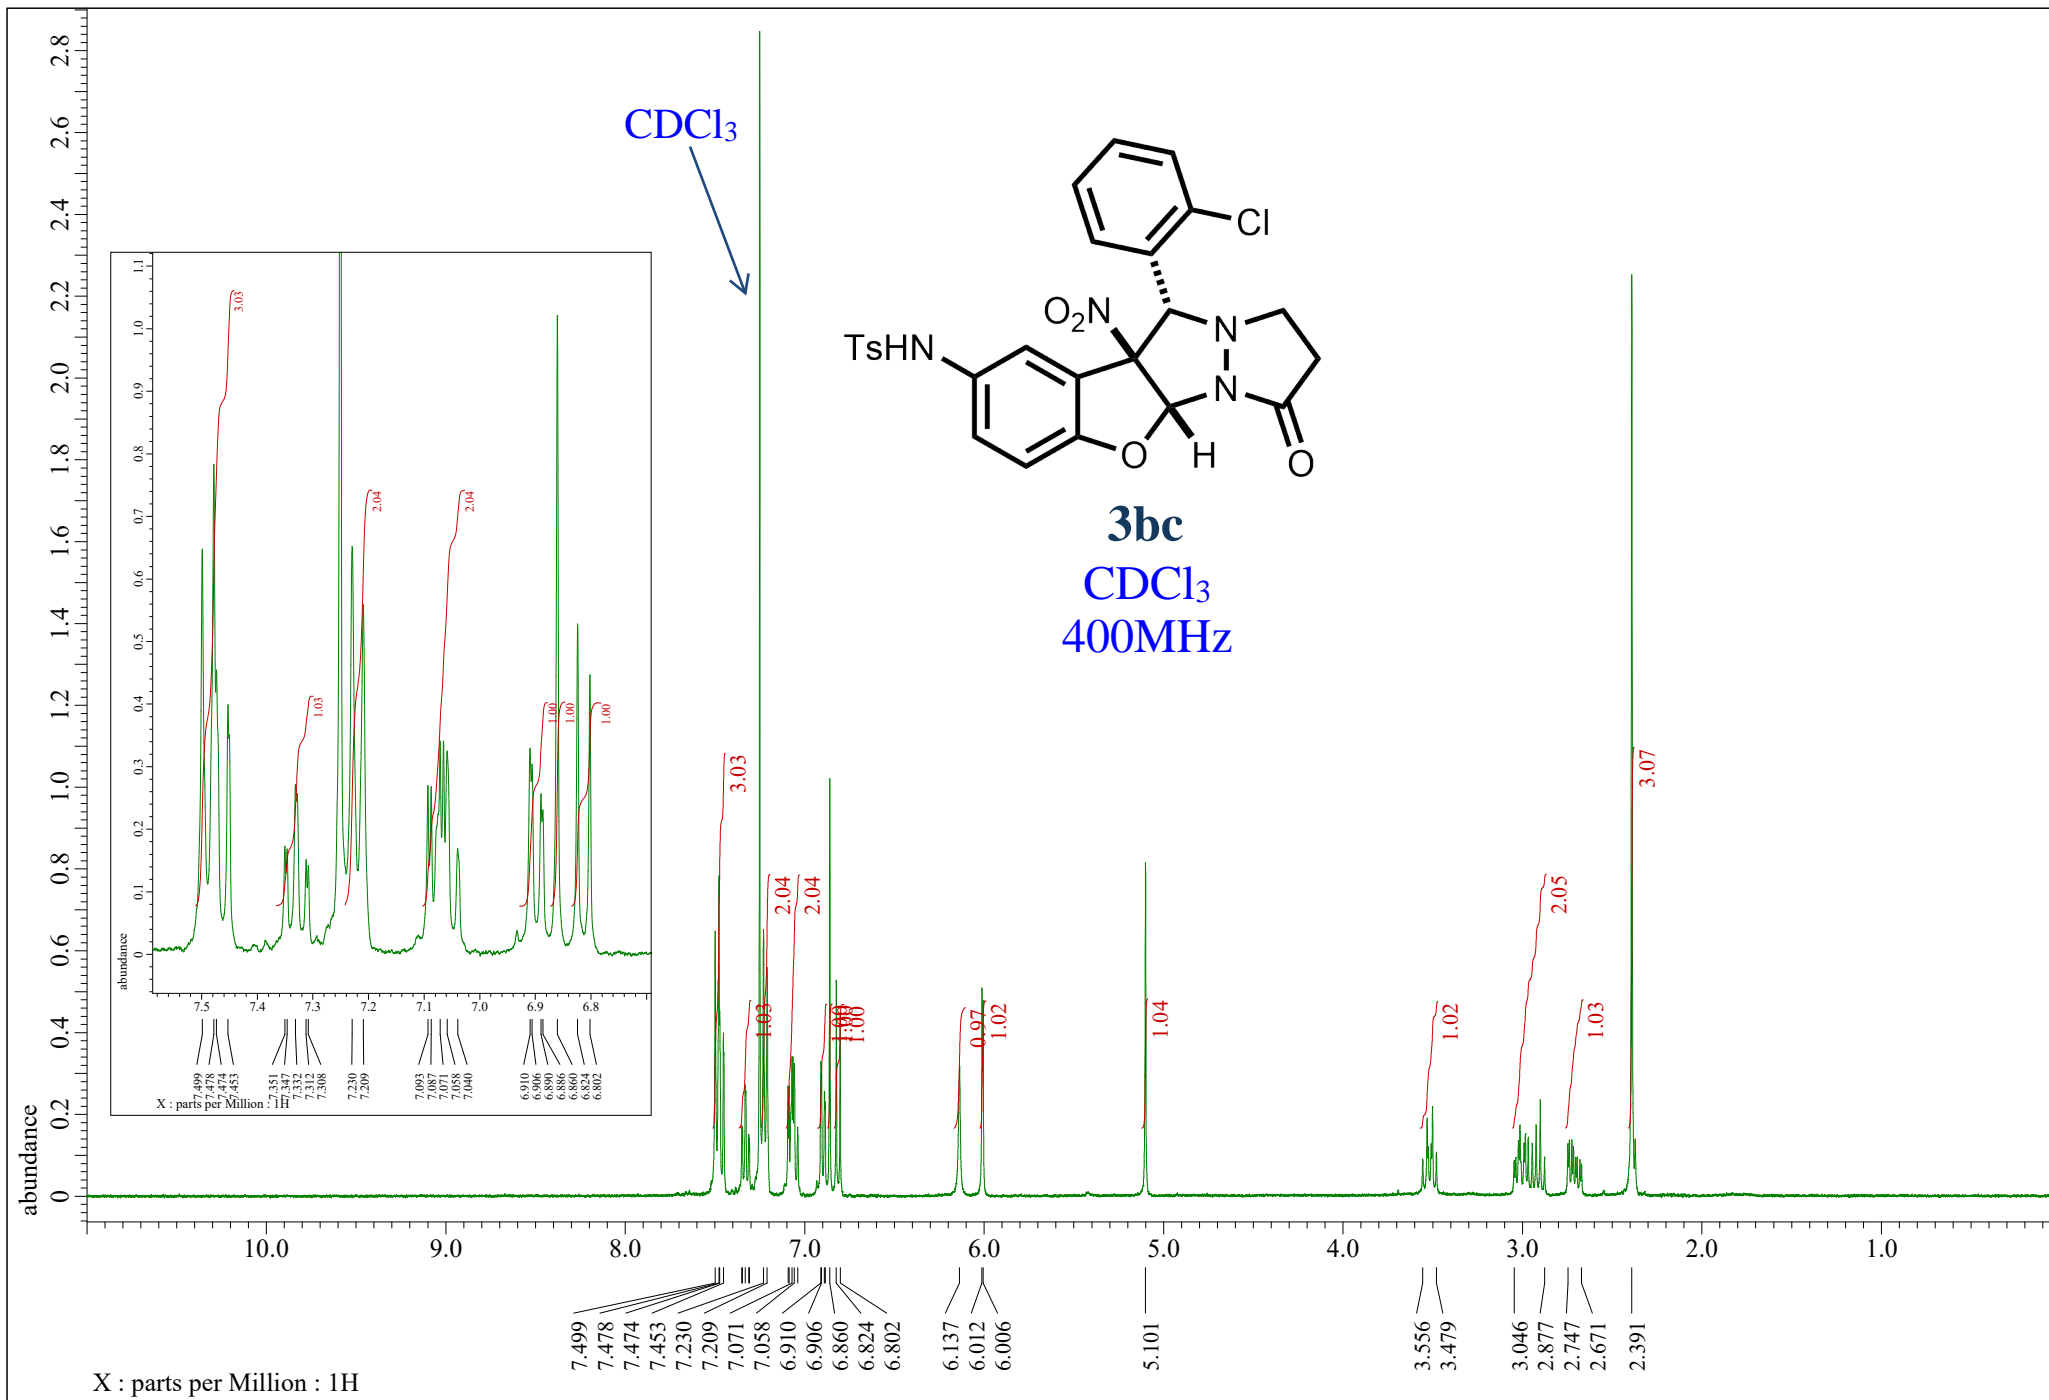

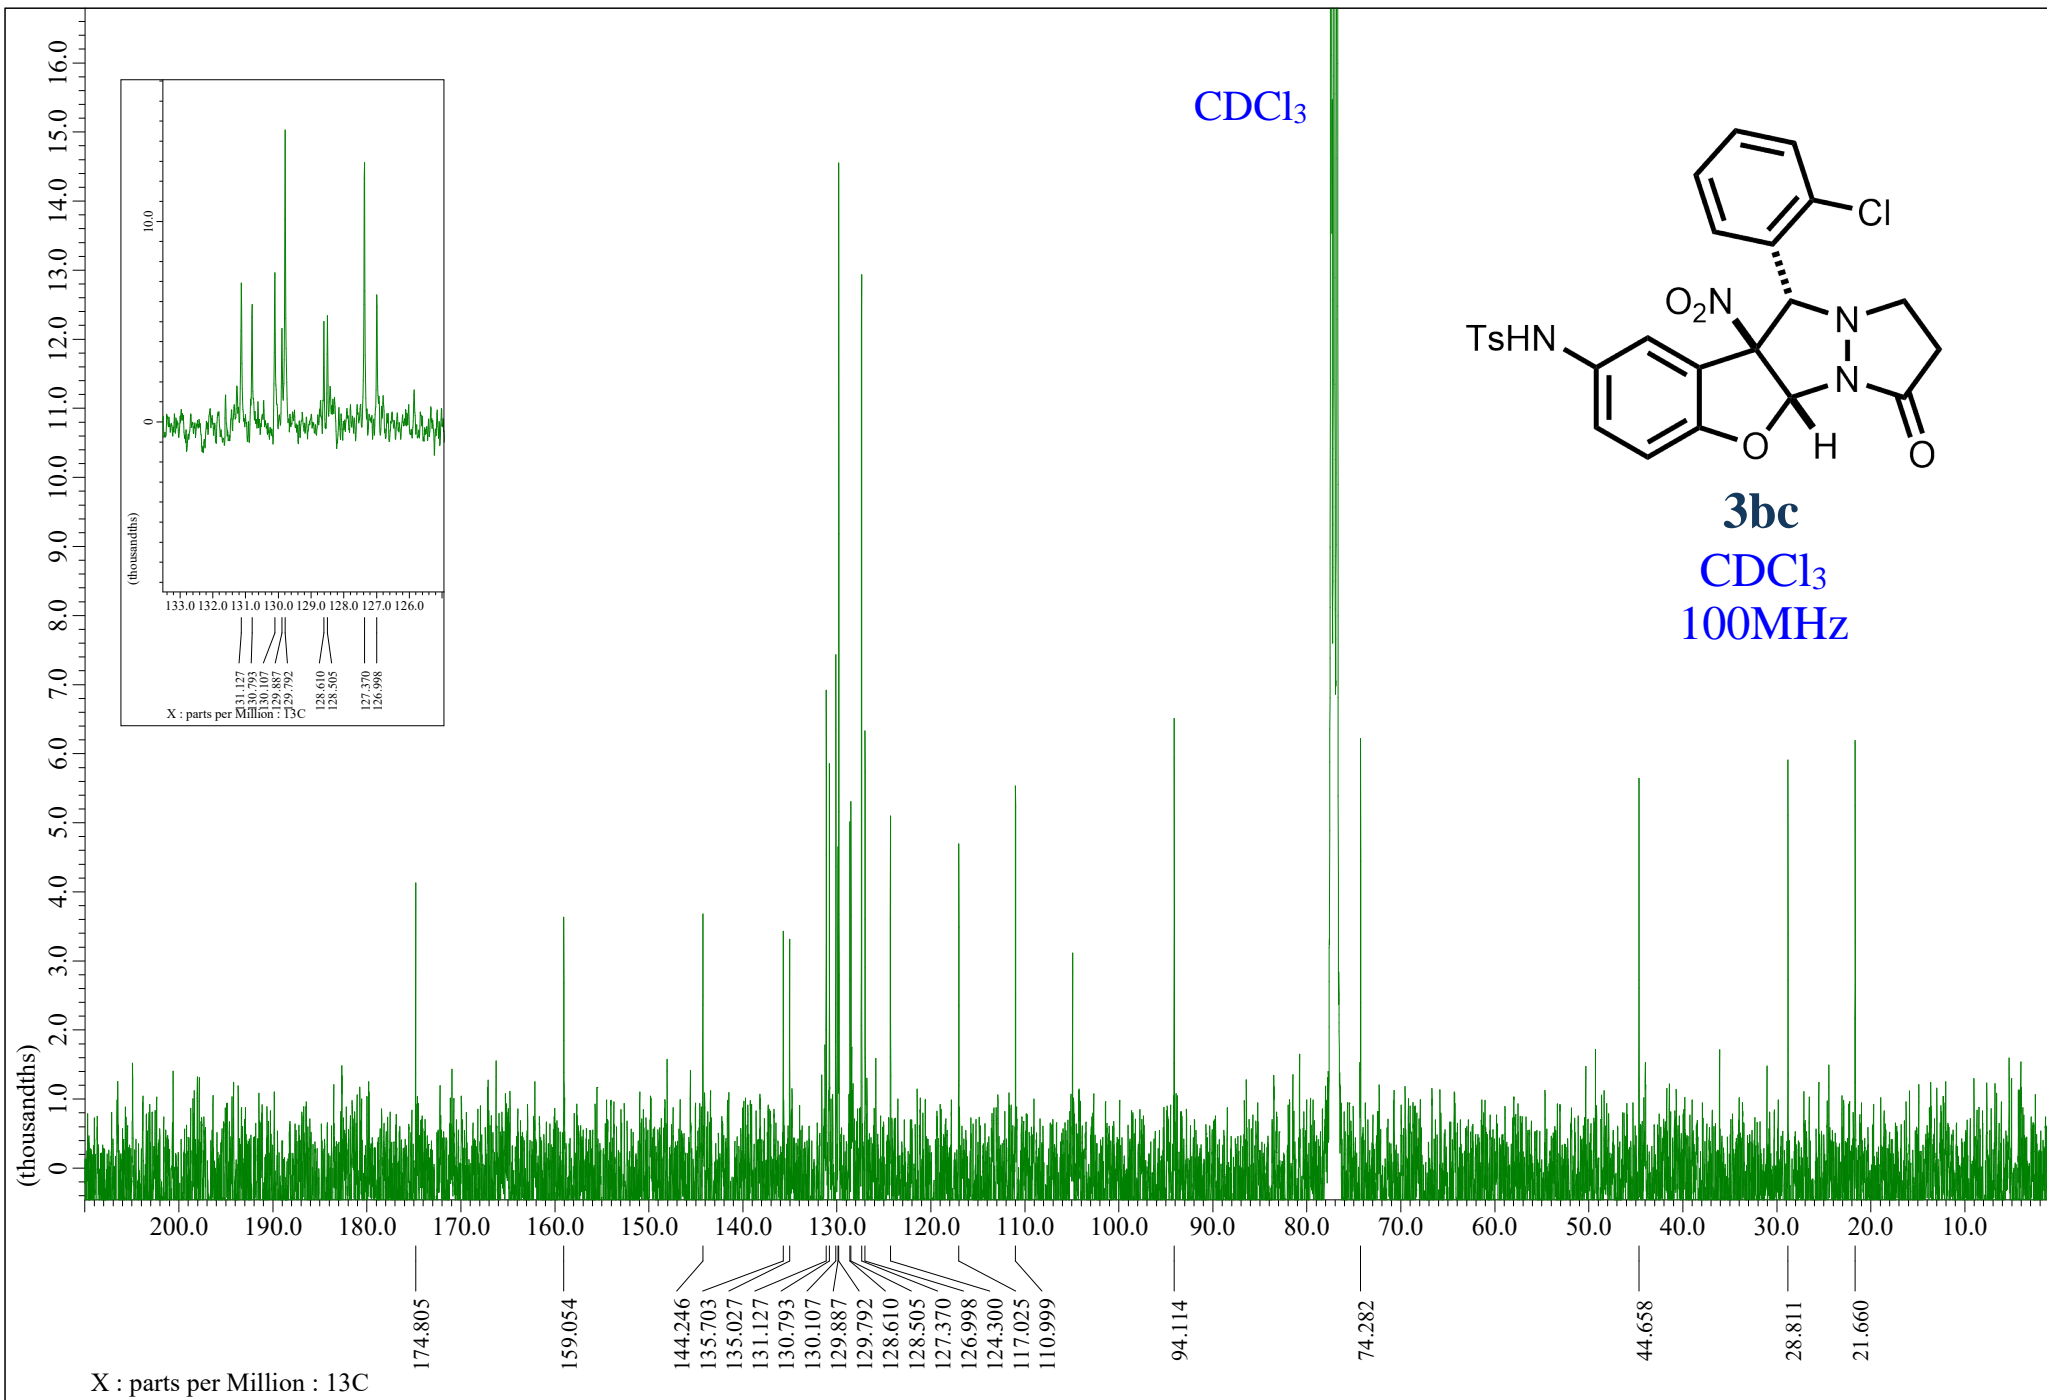

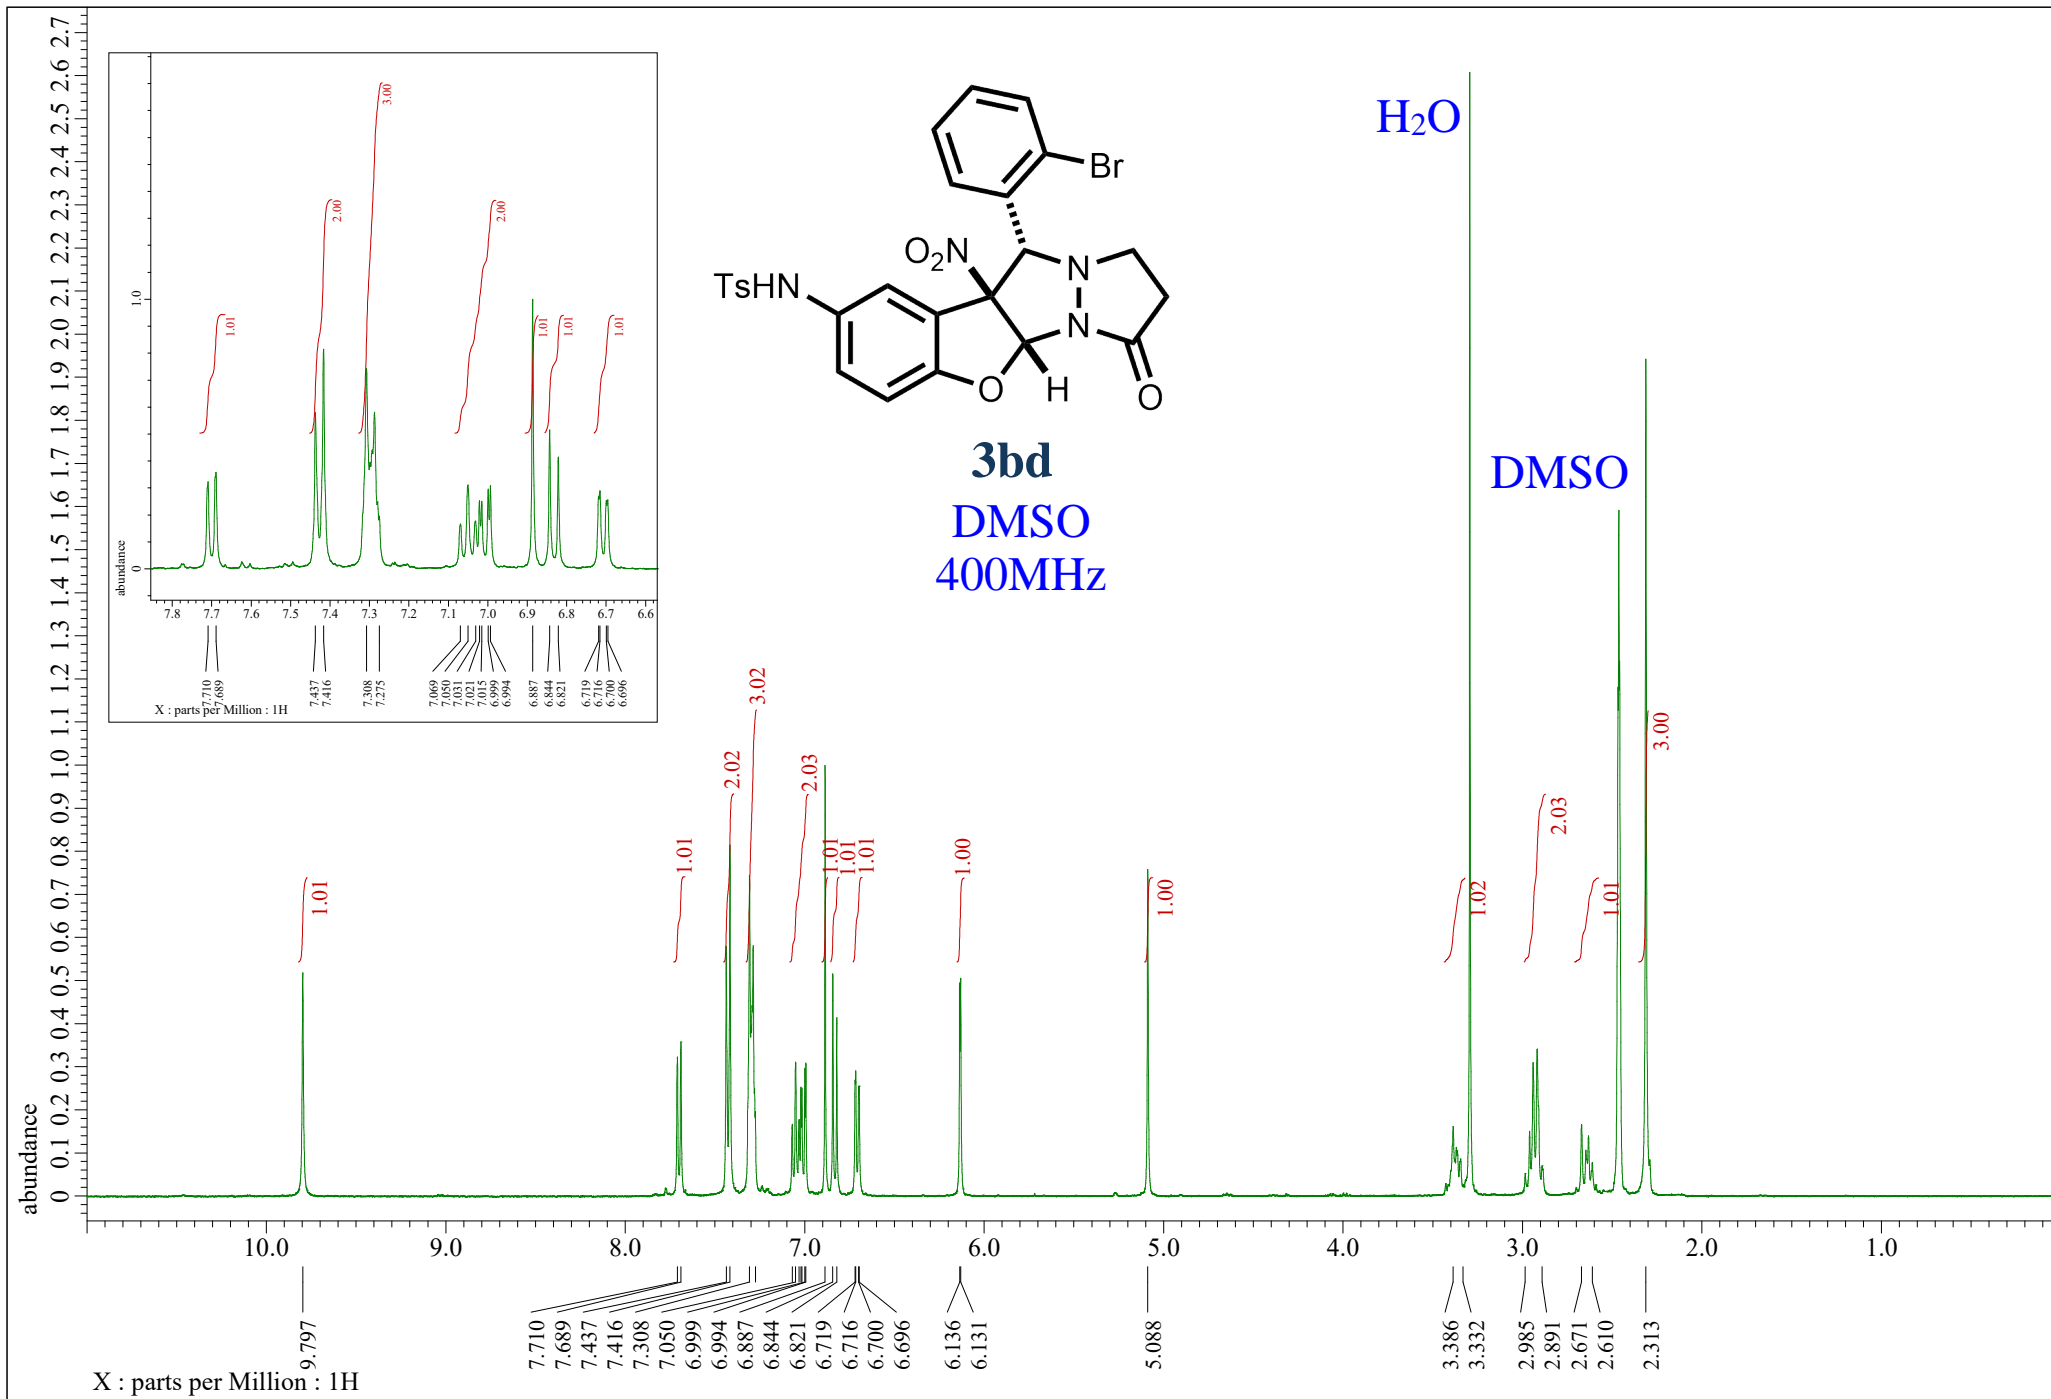

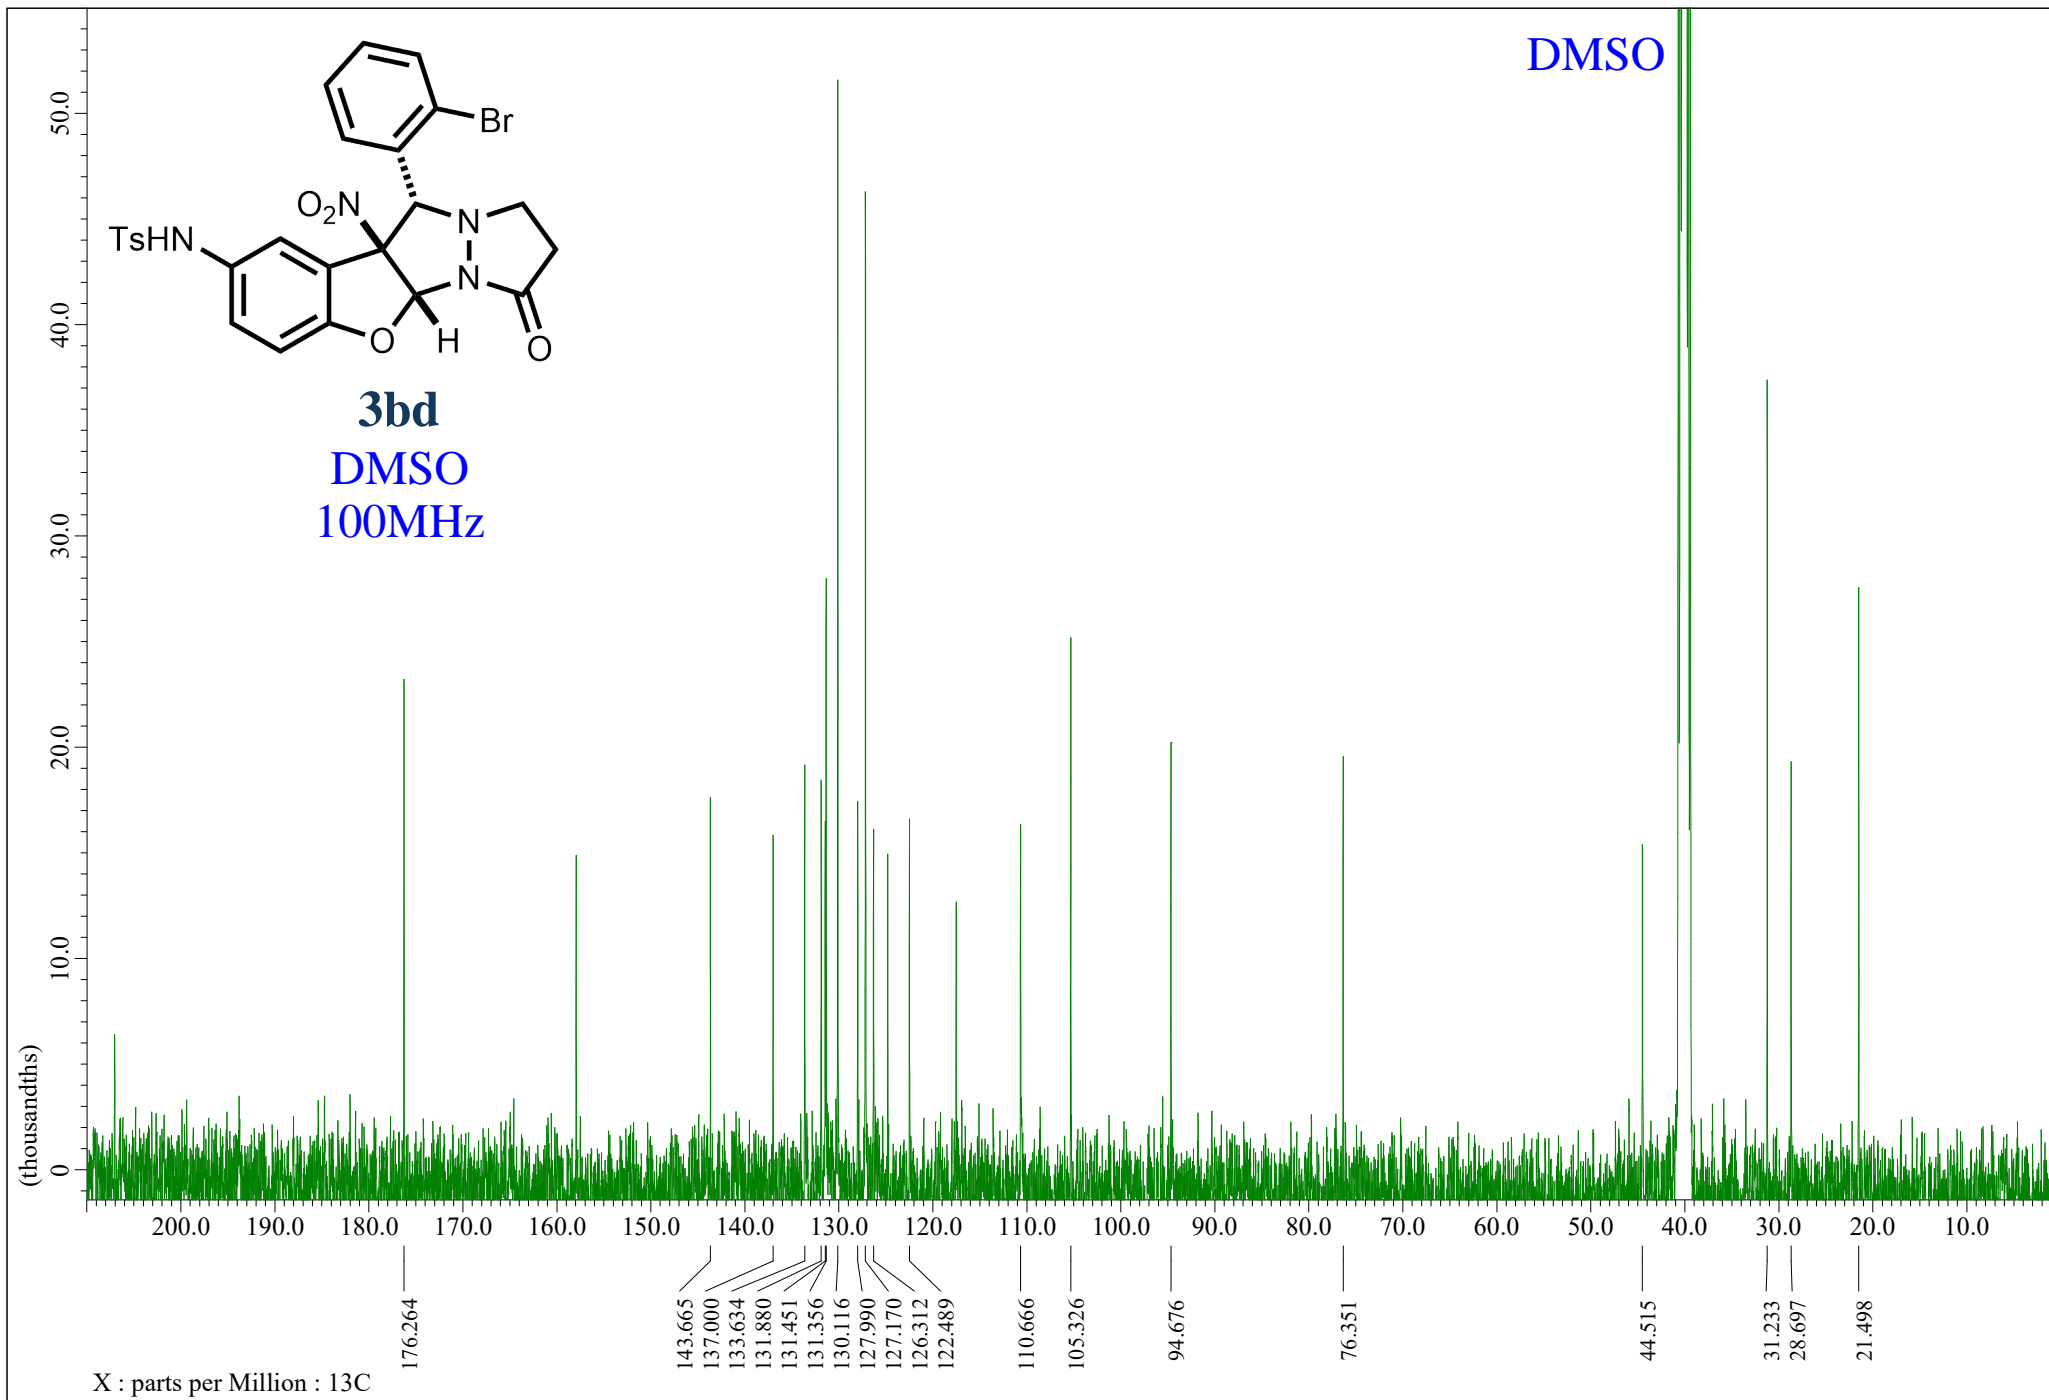

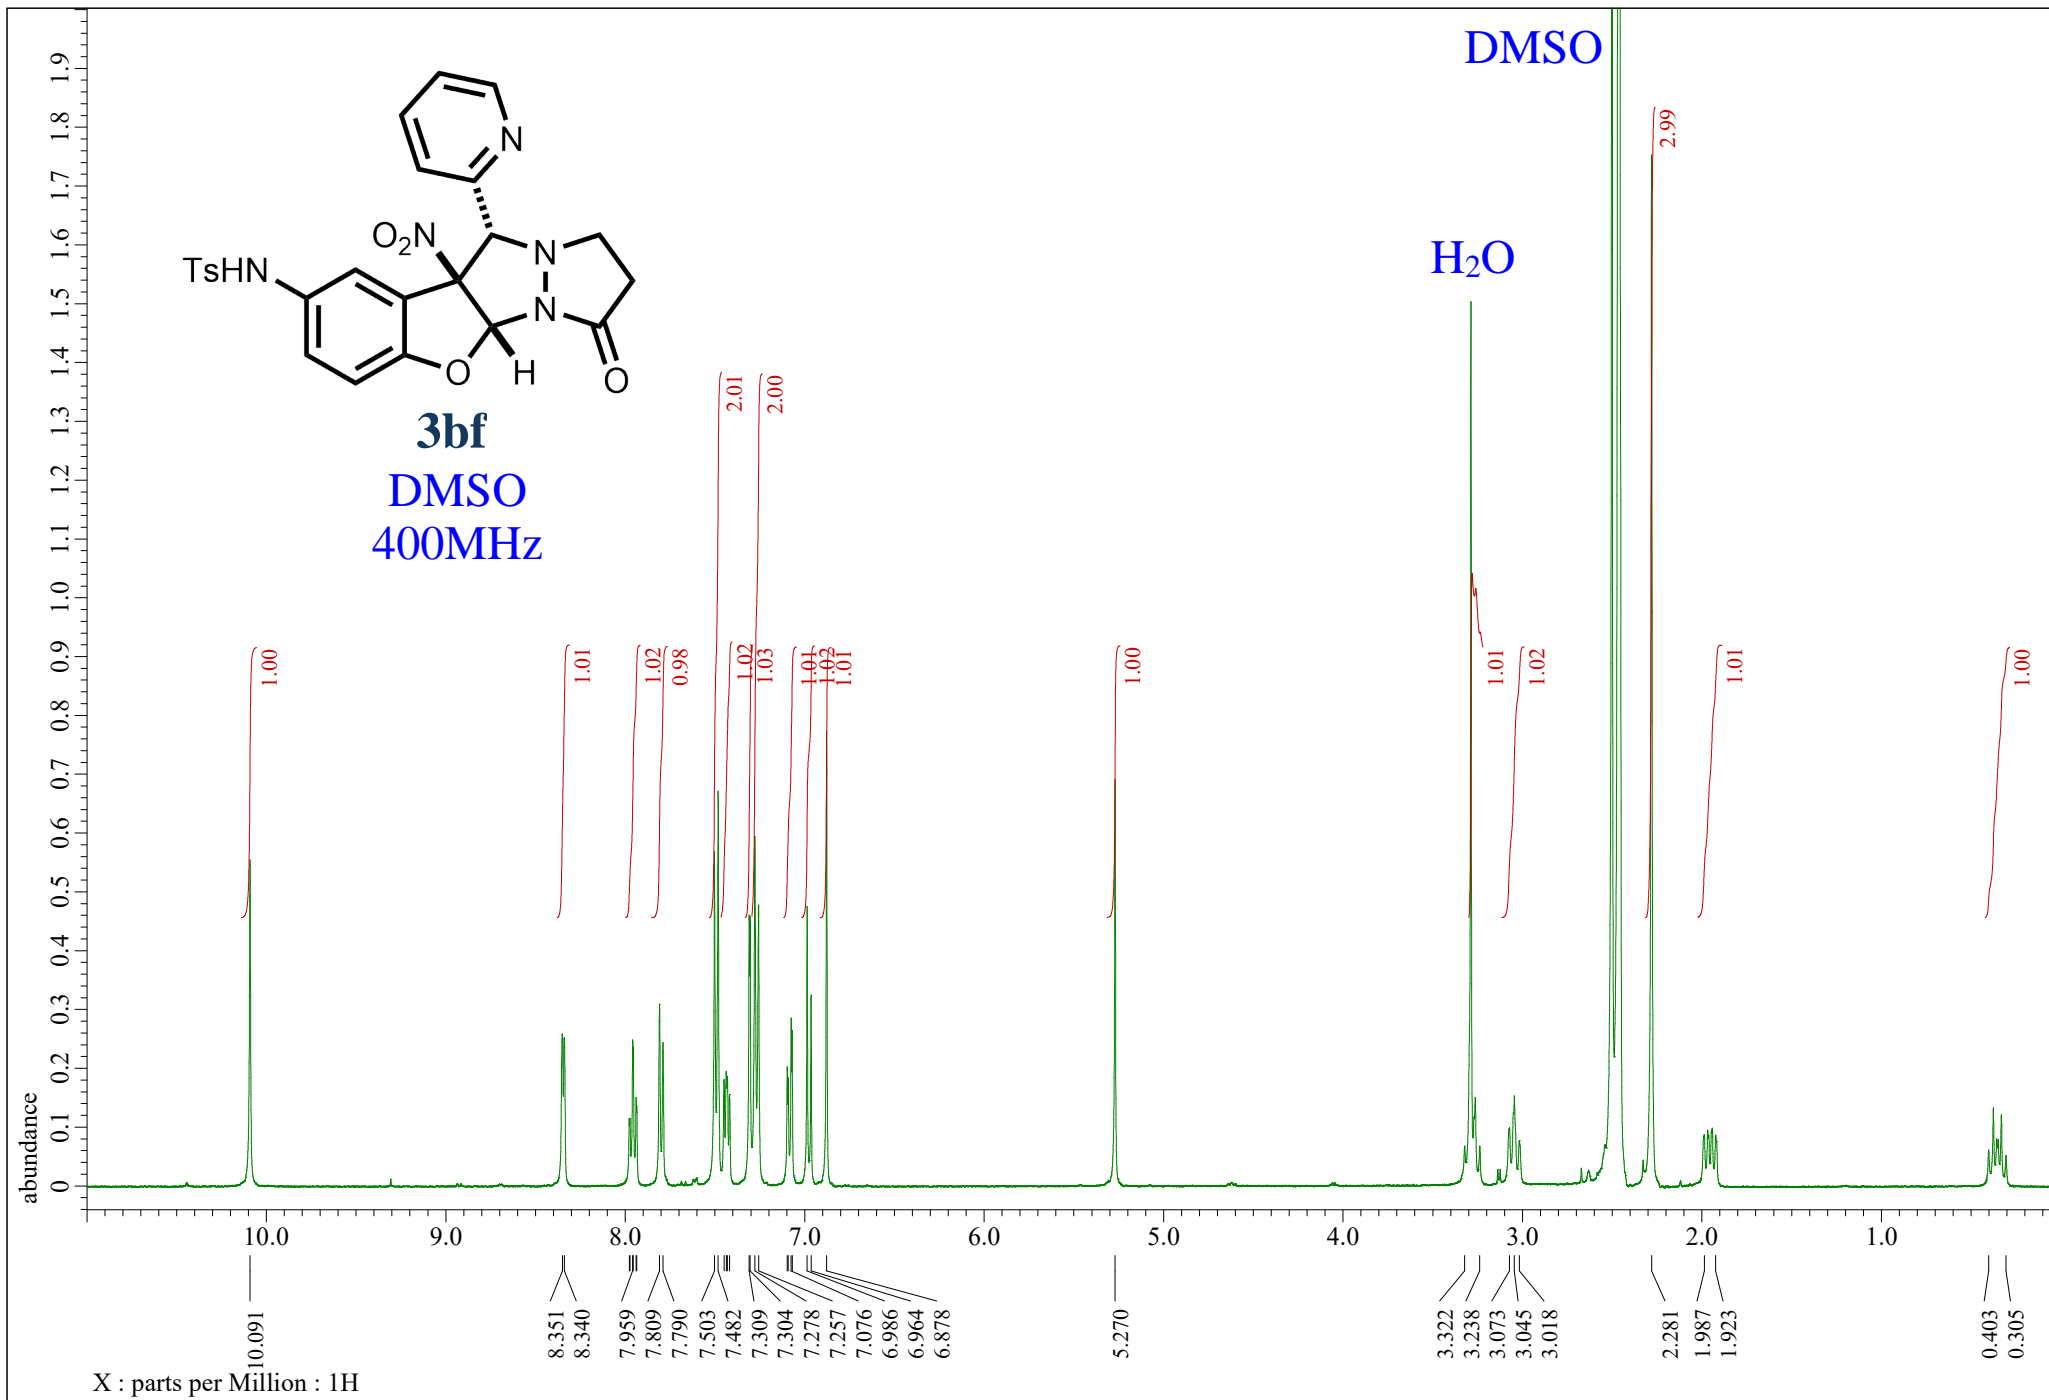

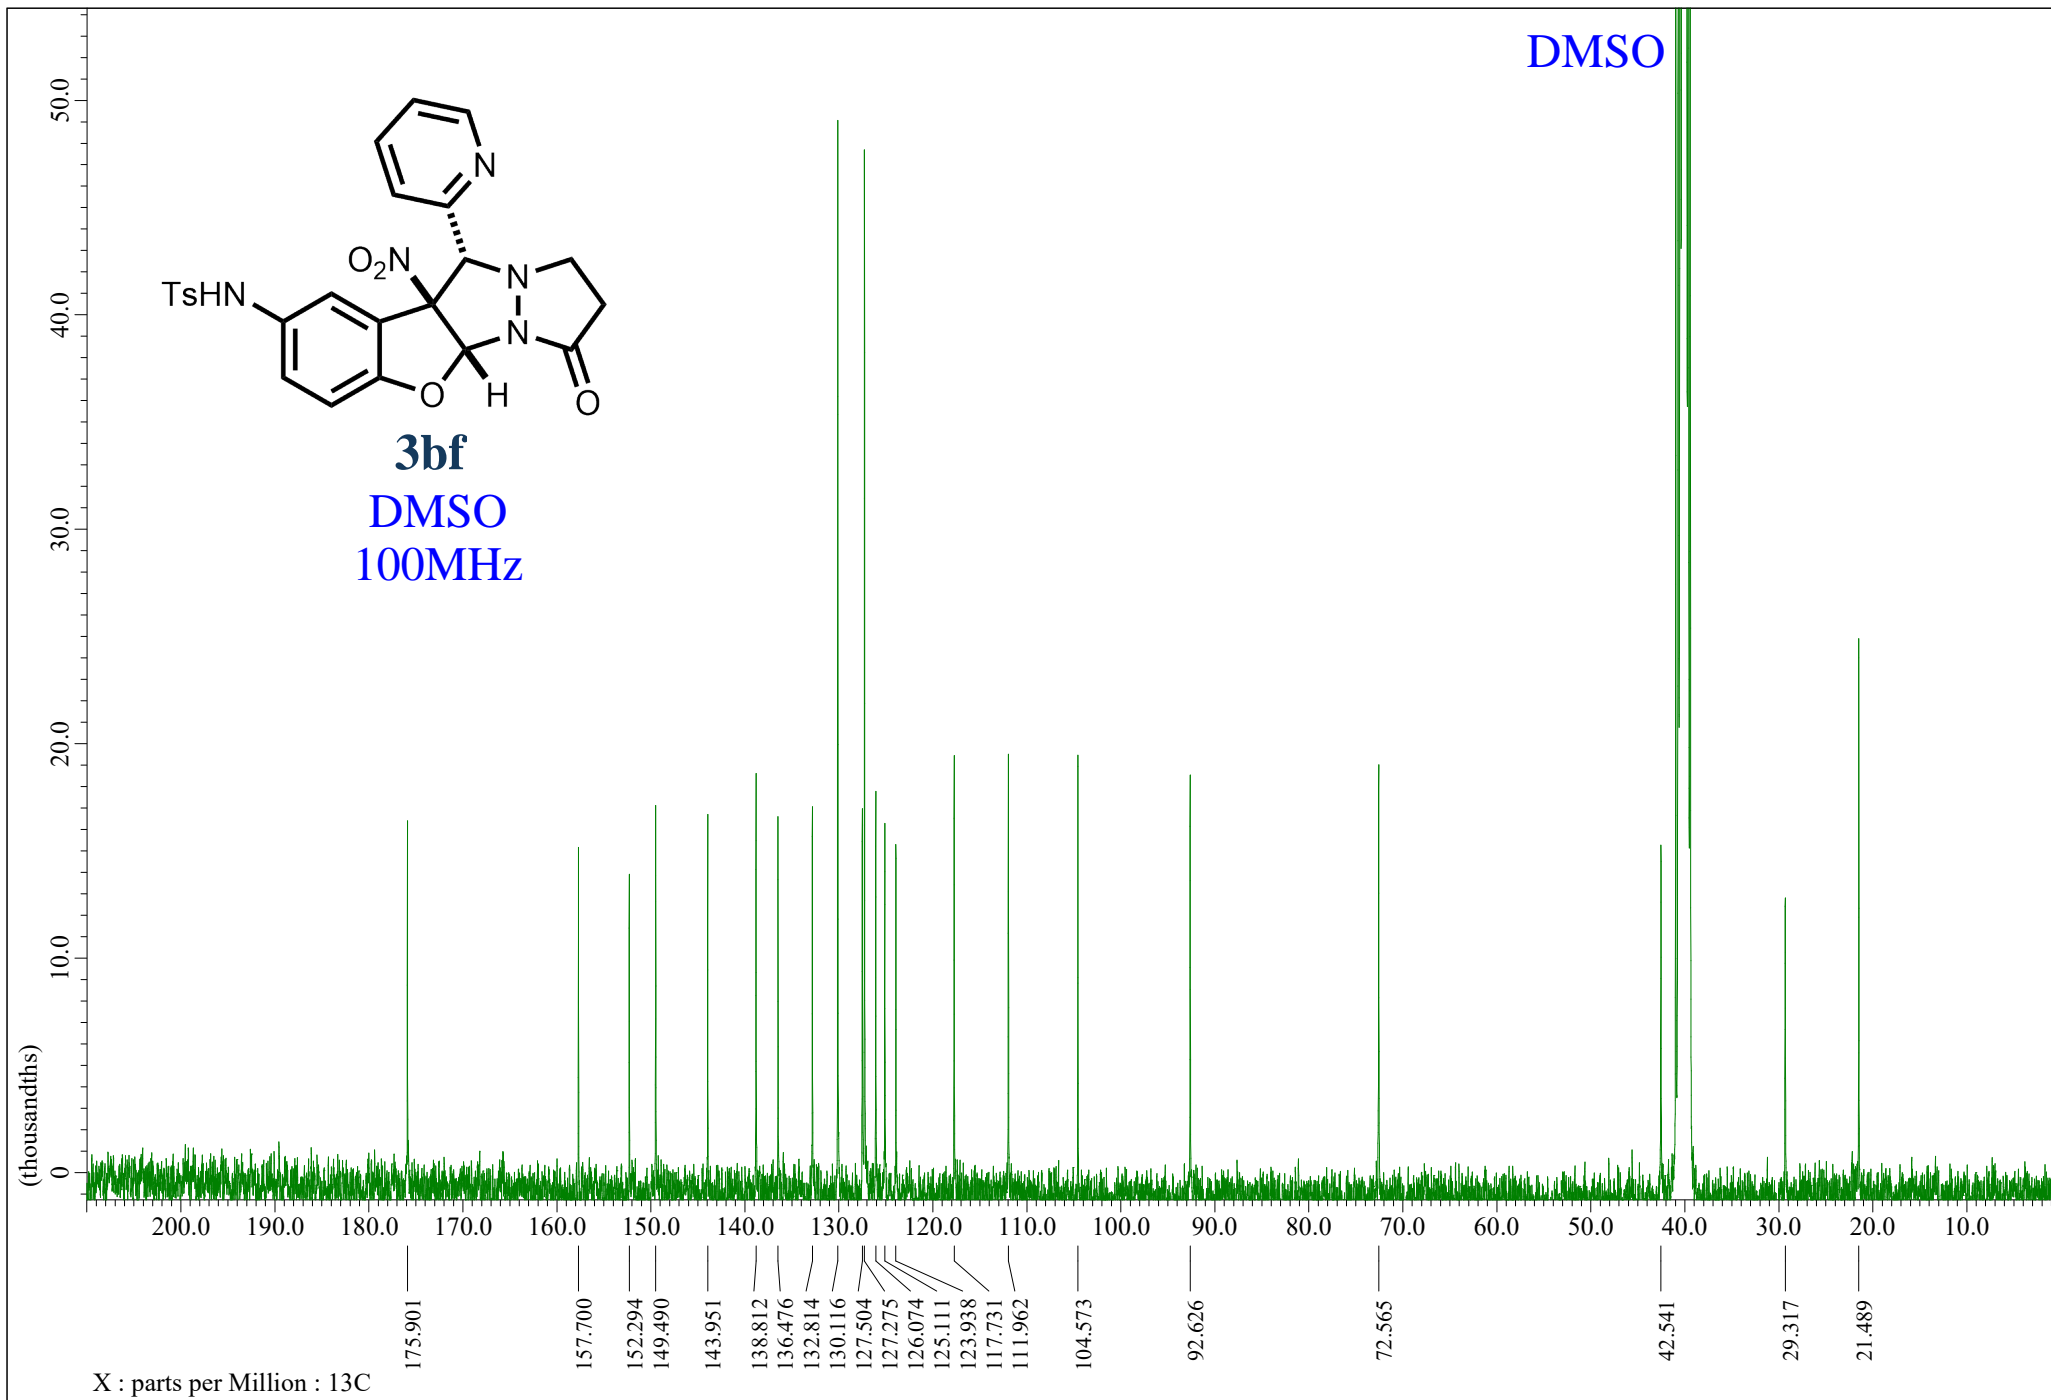

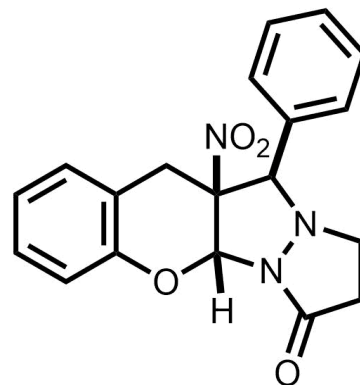

**5aa**  
DMSO  
400MHz

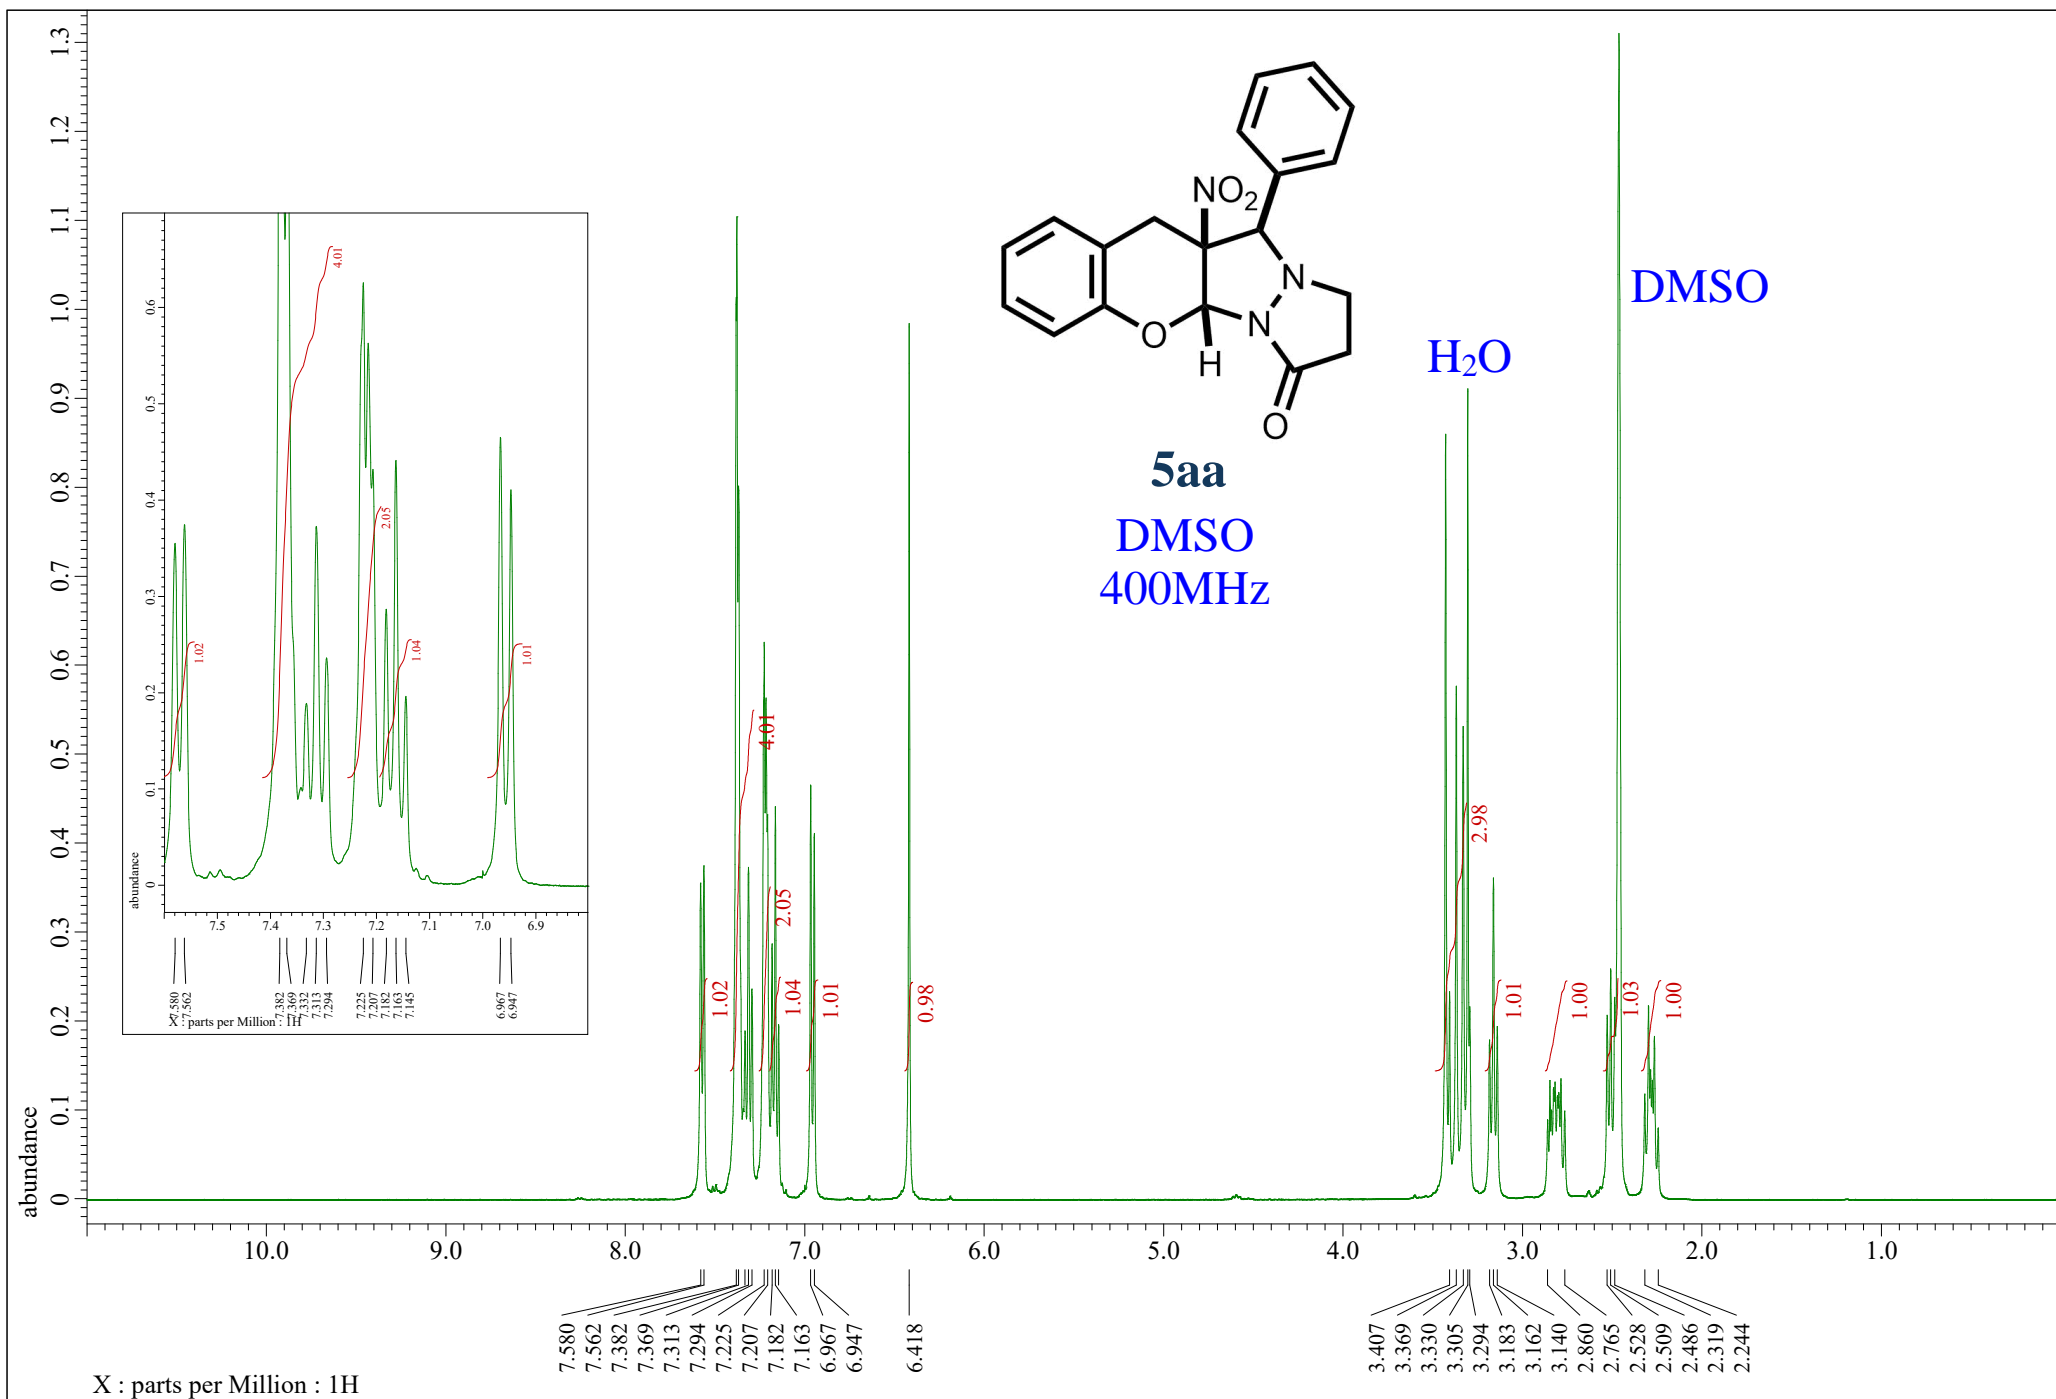

X : parts per Million : 1H



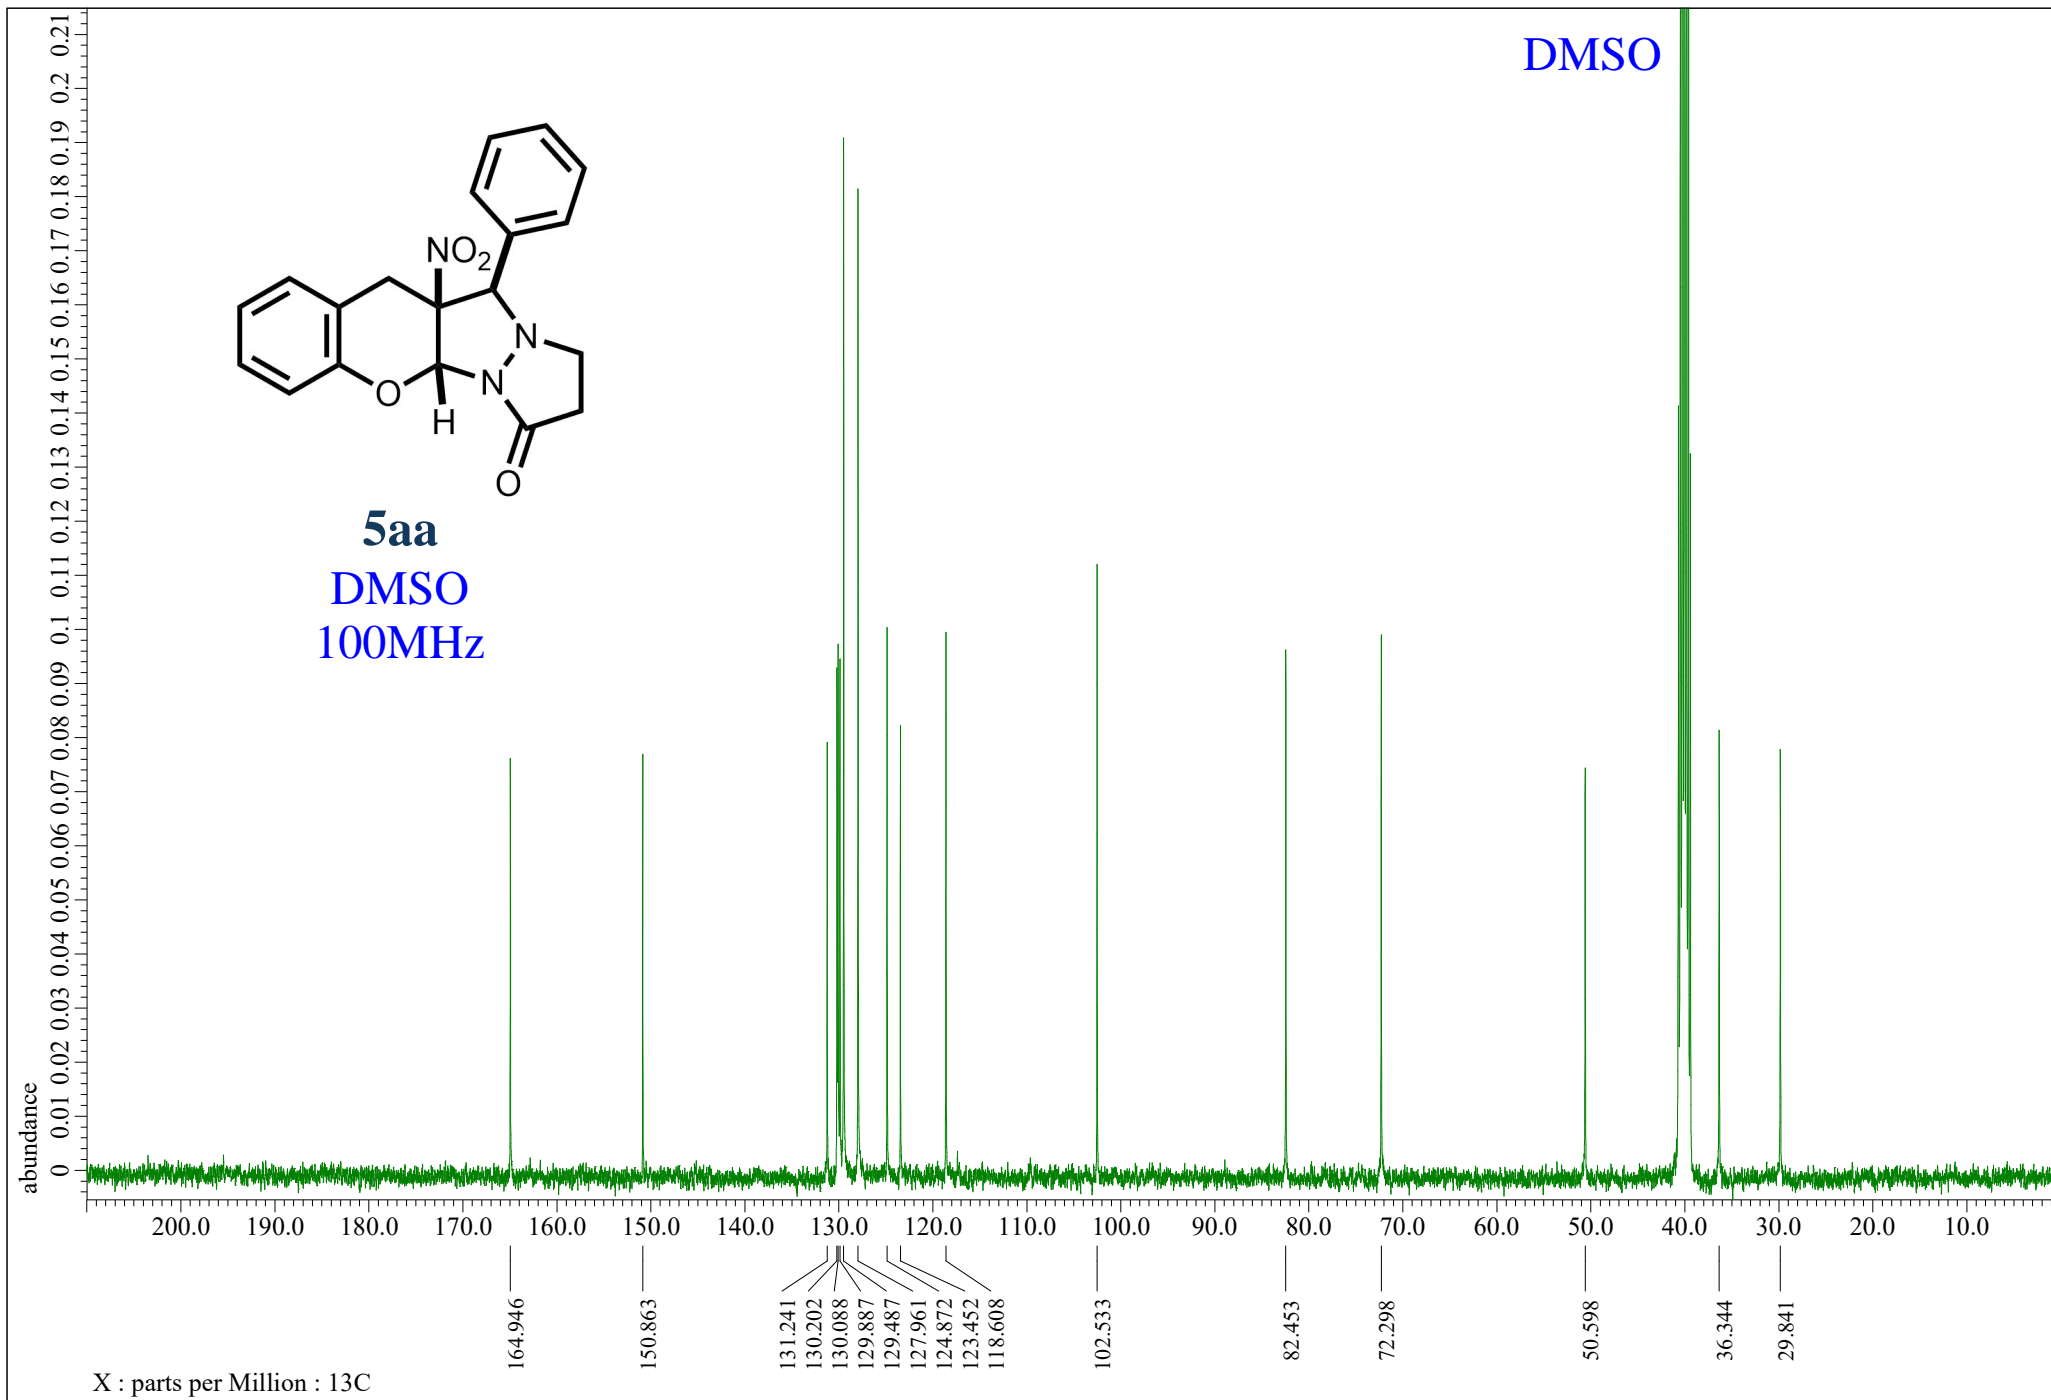

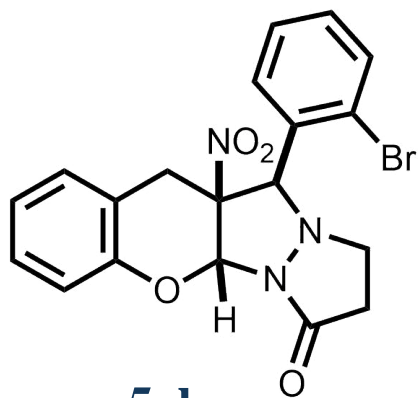

**5ab**  
DMSO  
400MHz

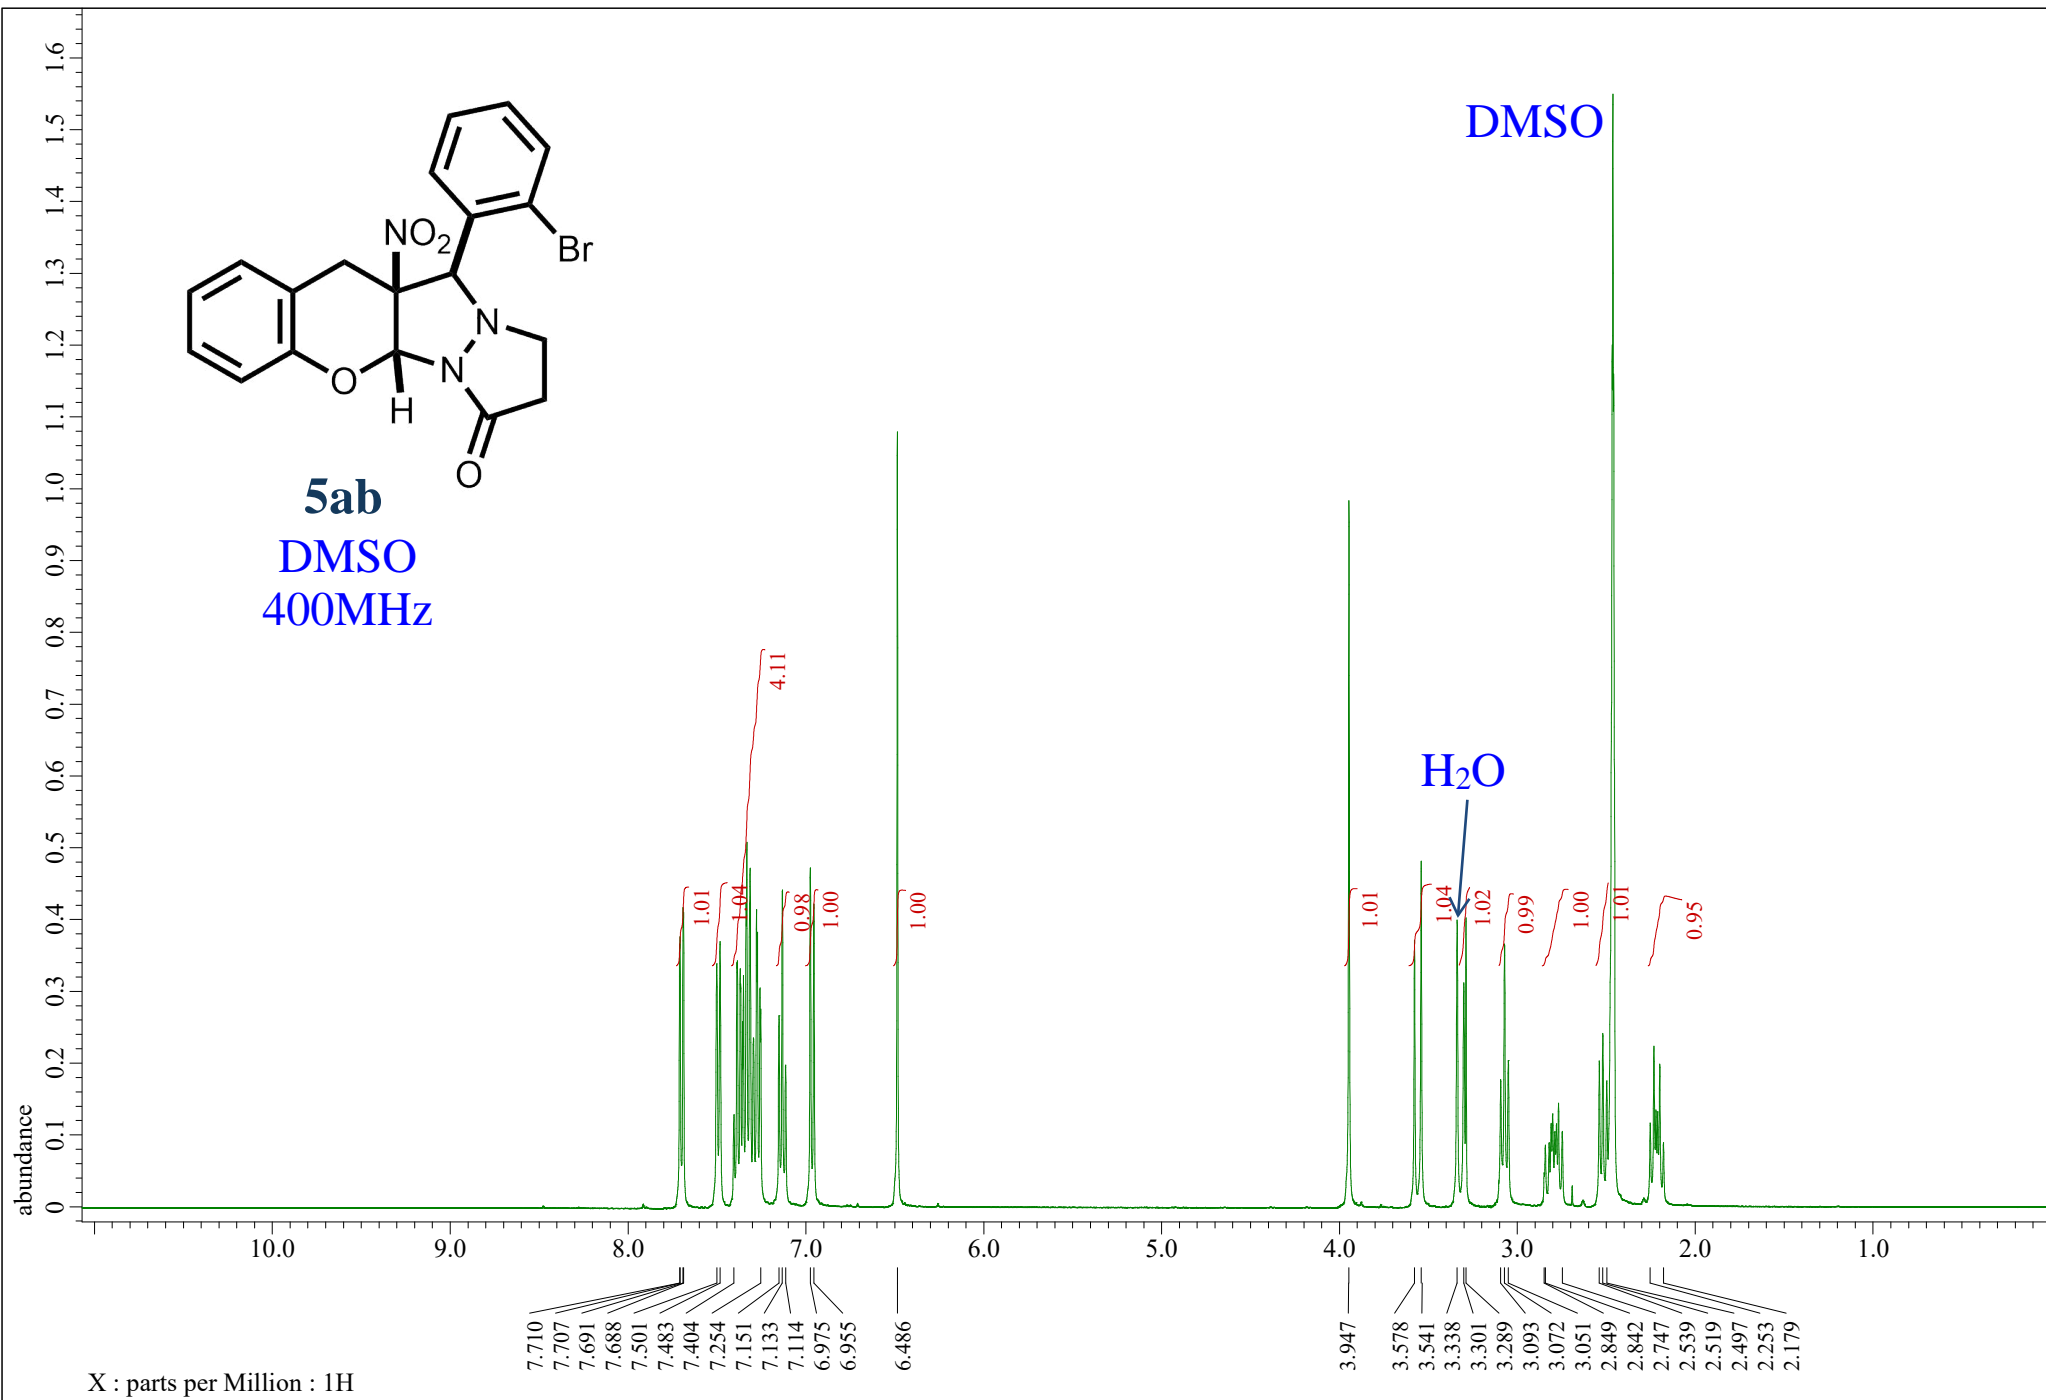

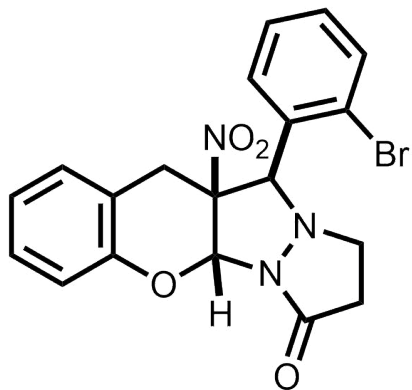

**5ab**  
DMSO  
100MHz

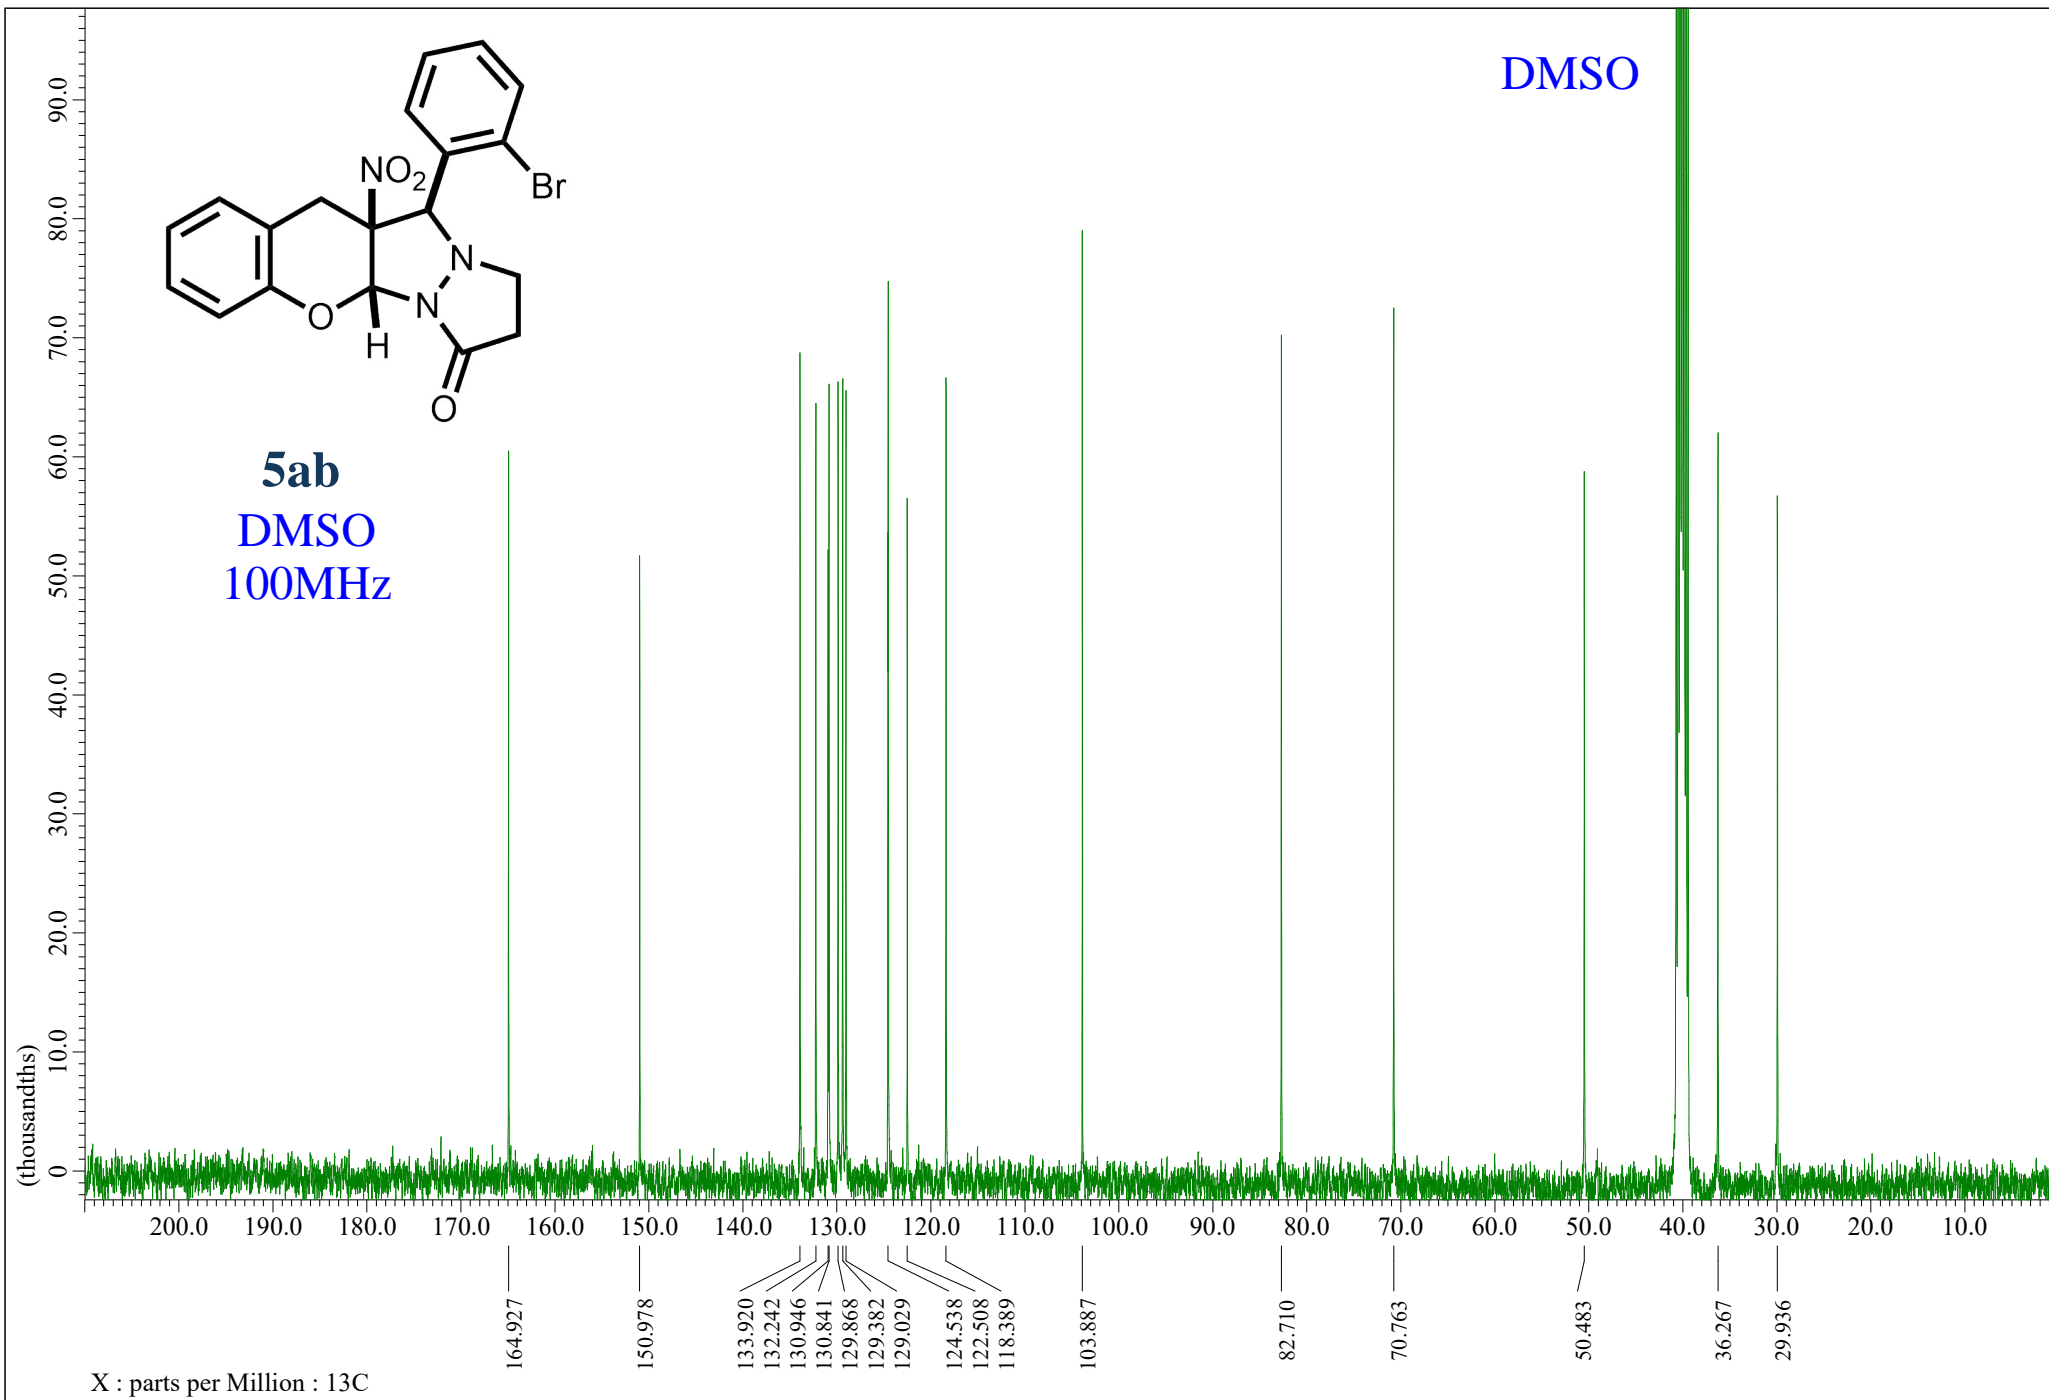



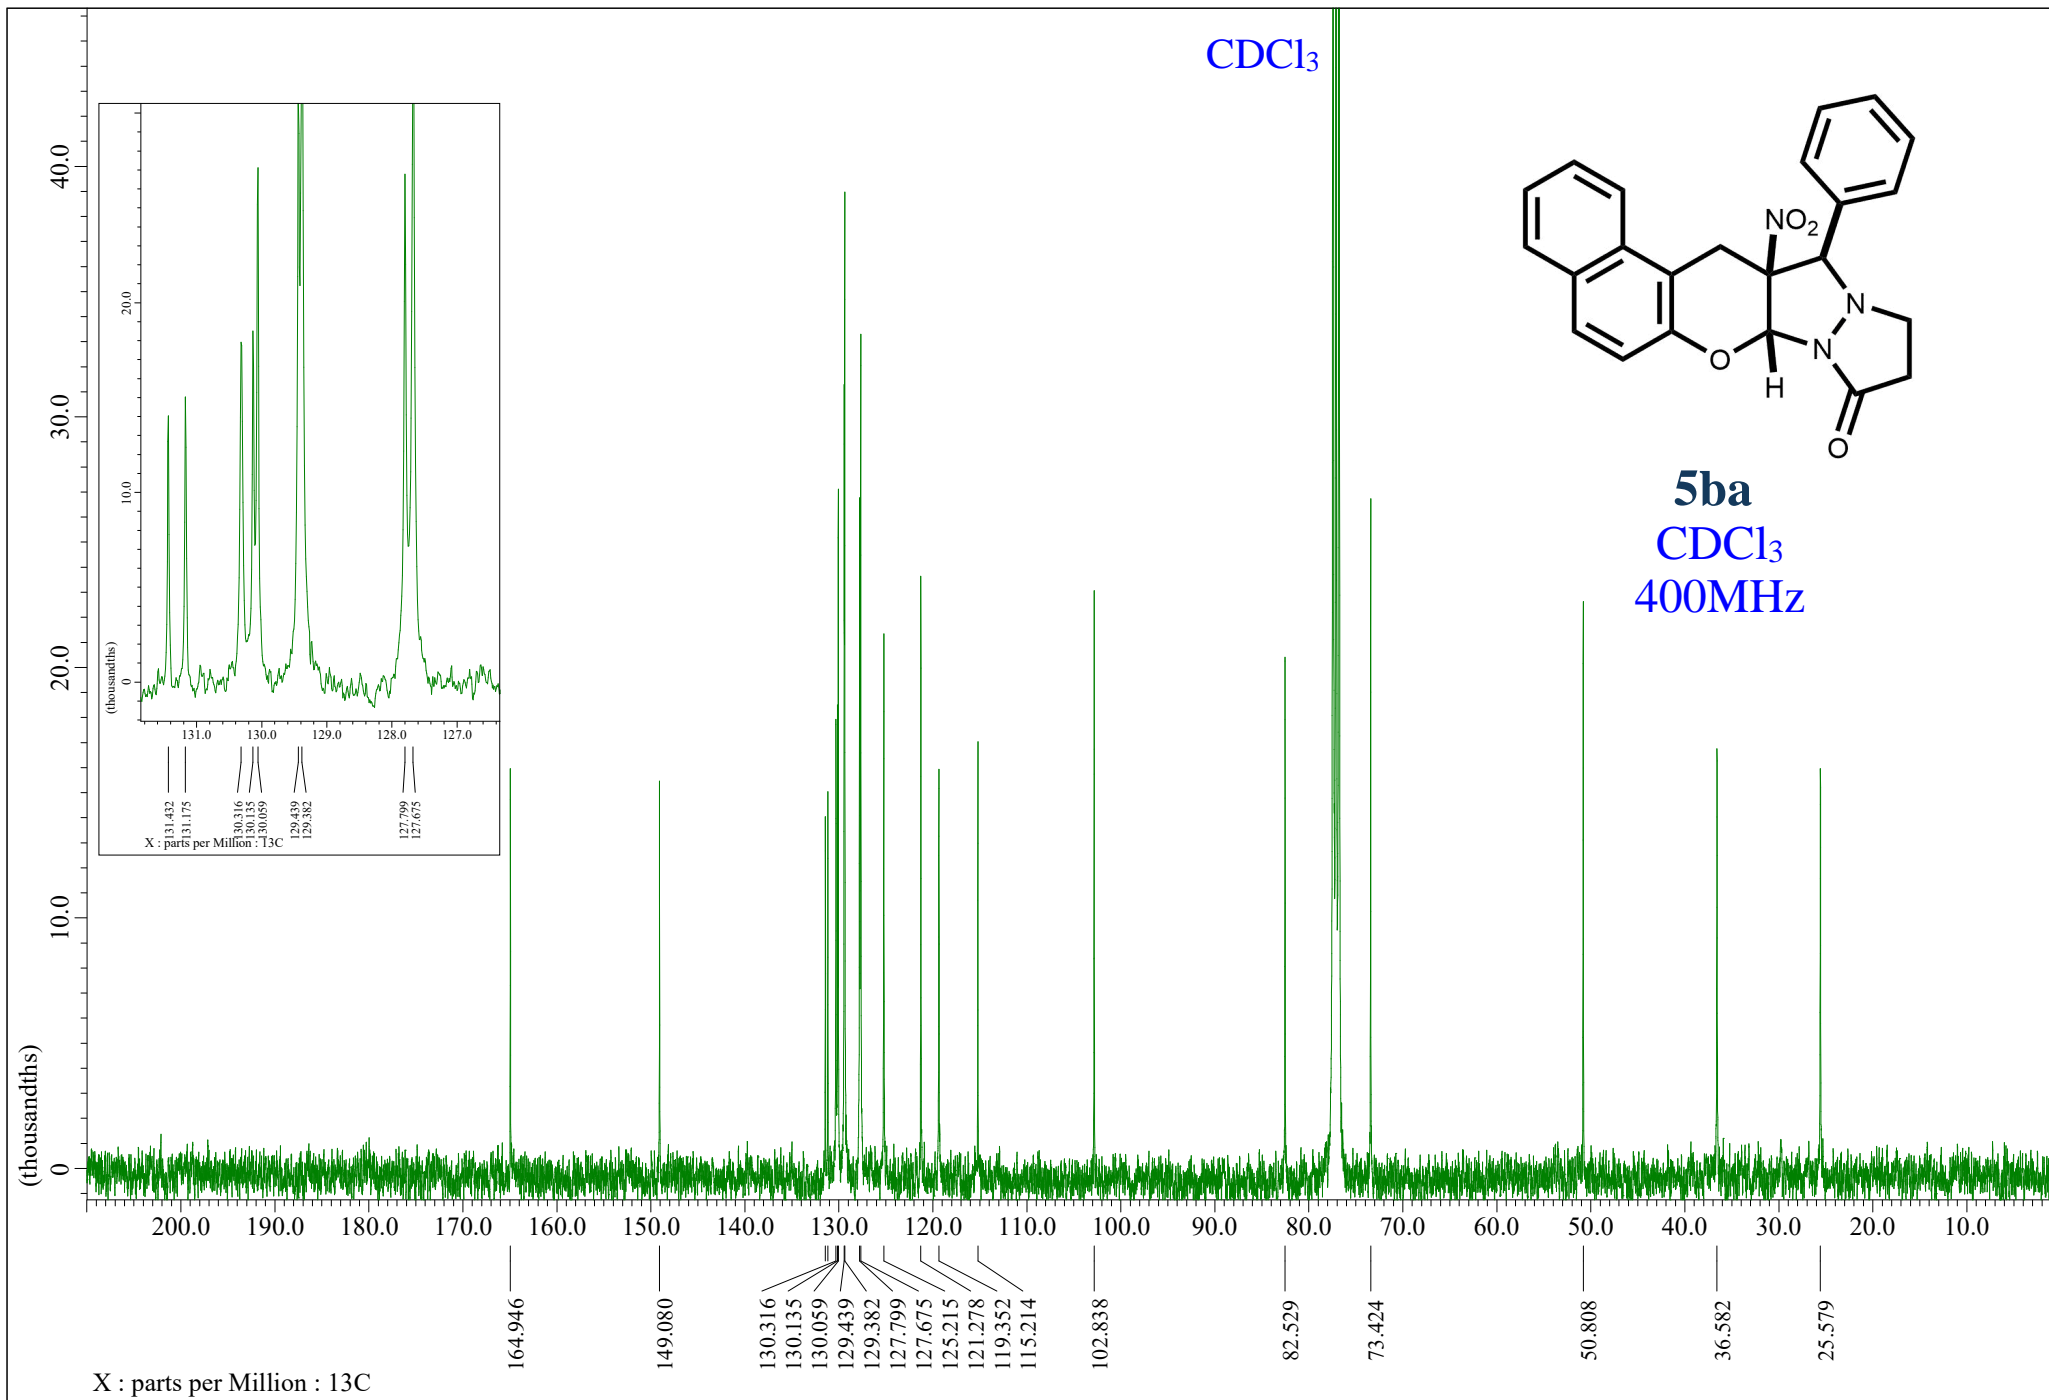

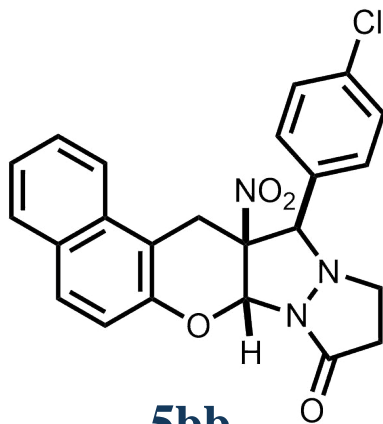

**5b**  
DMSO  
400MHz

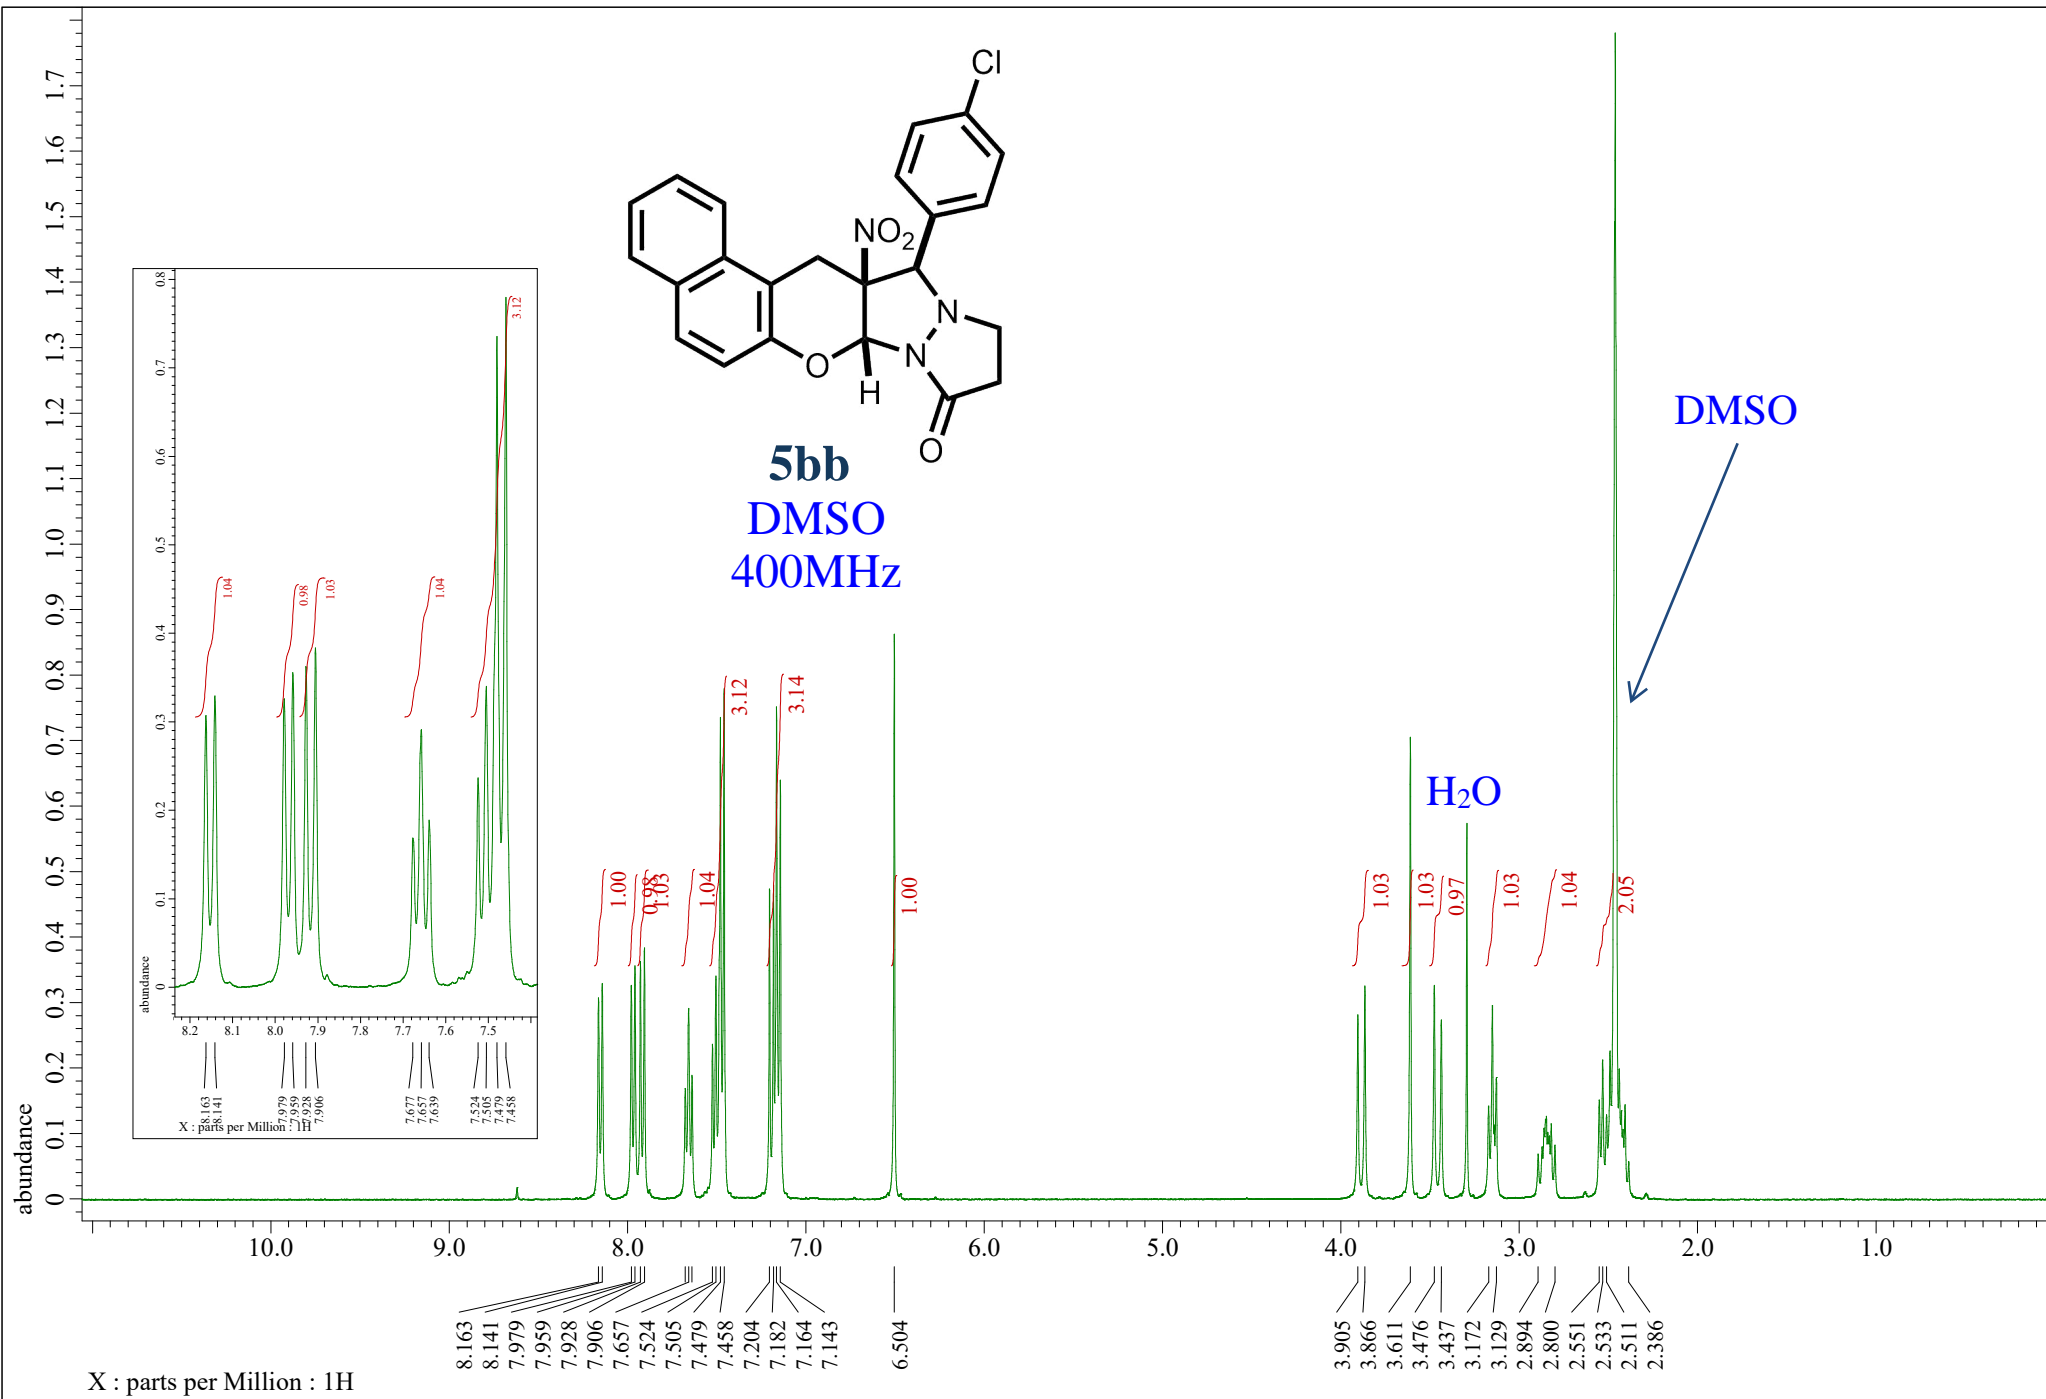

X : parts per Million : <sup>1</sup>H

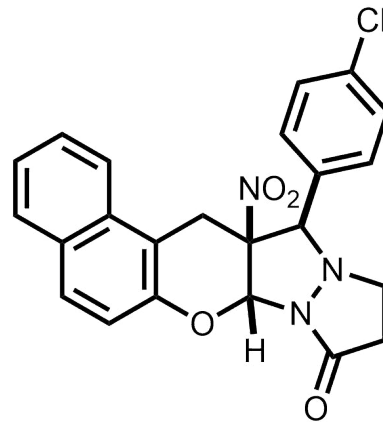

**5bb**  
DMSO  
100MHz

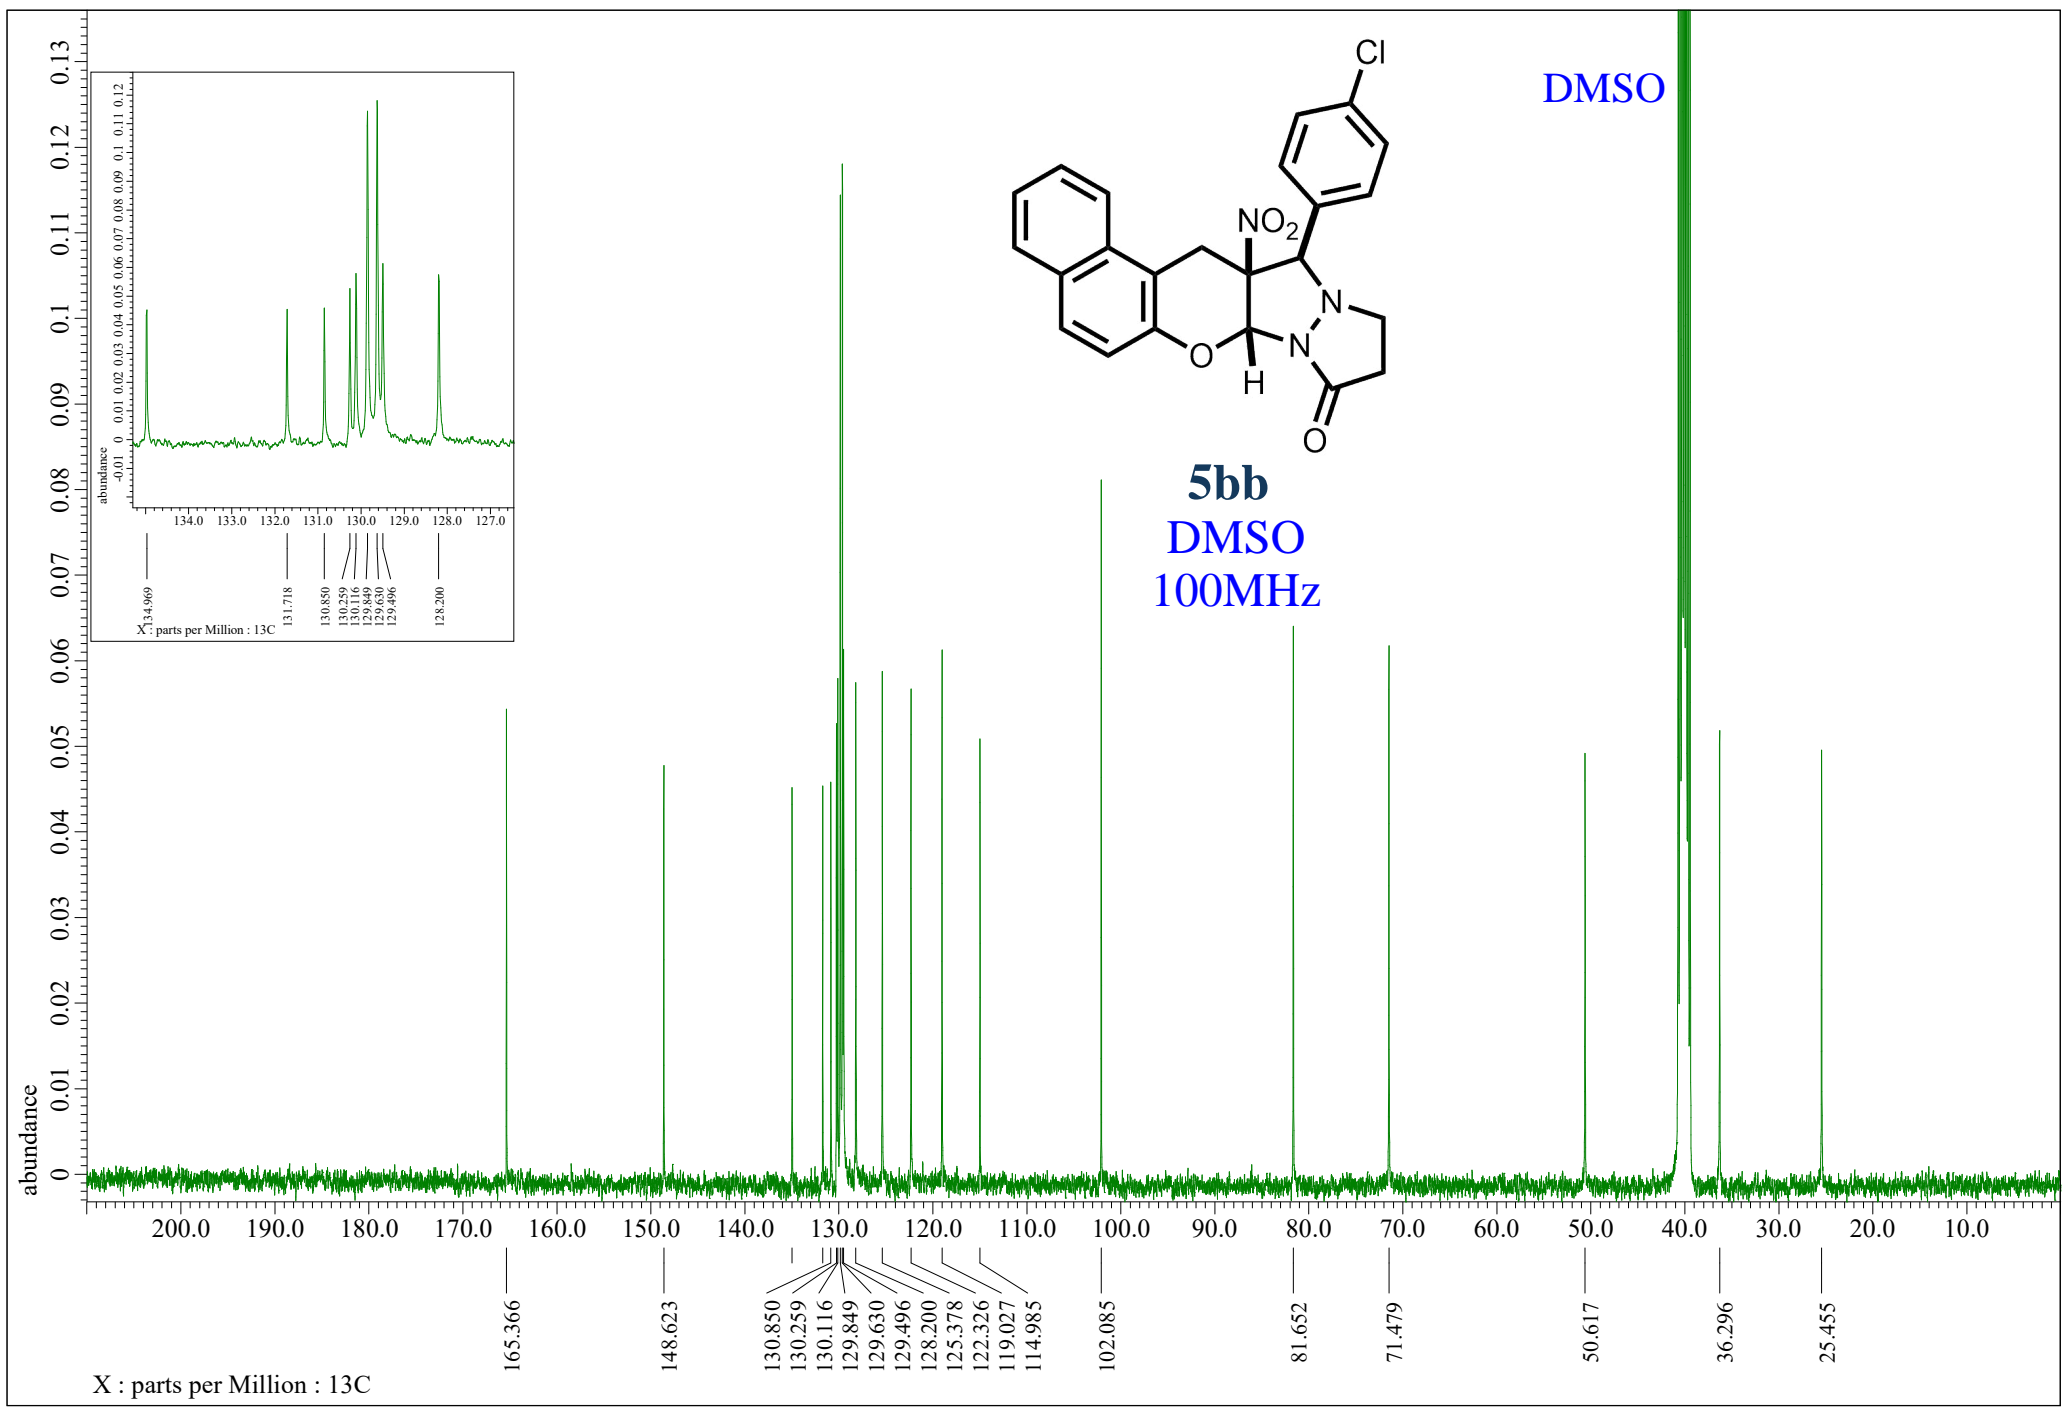

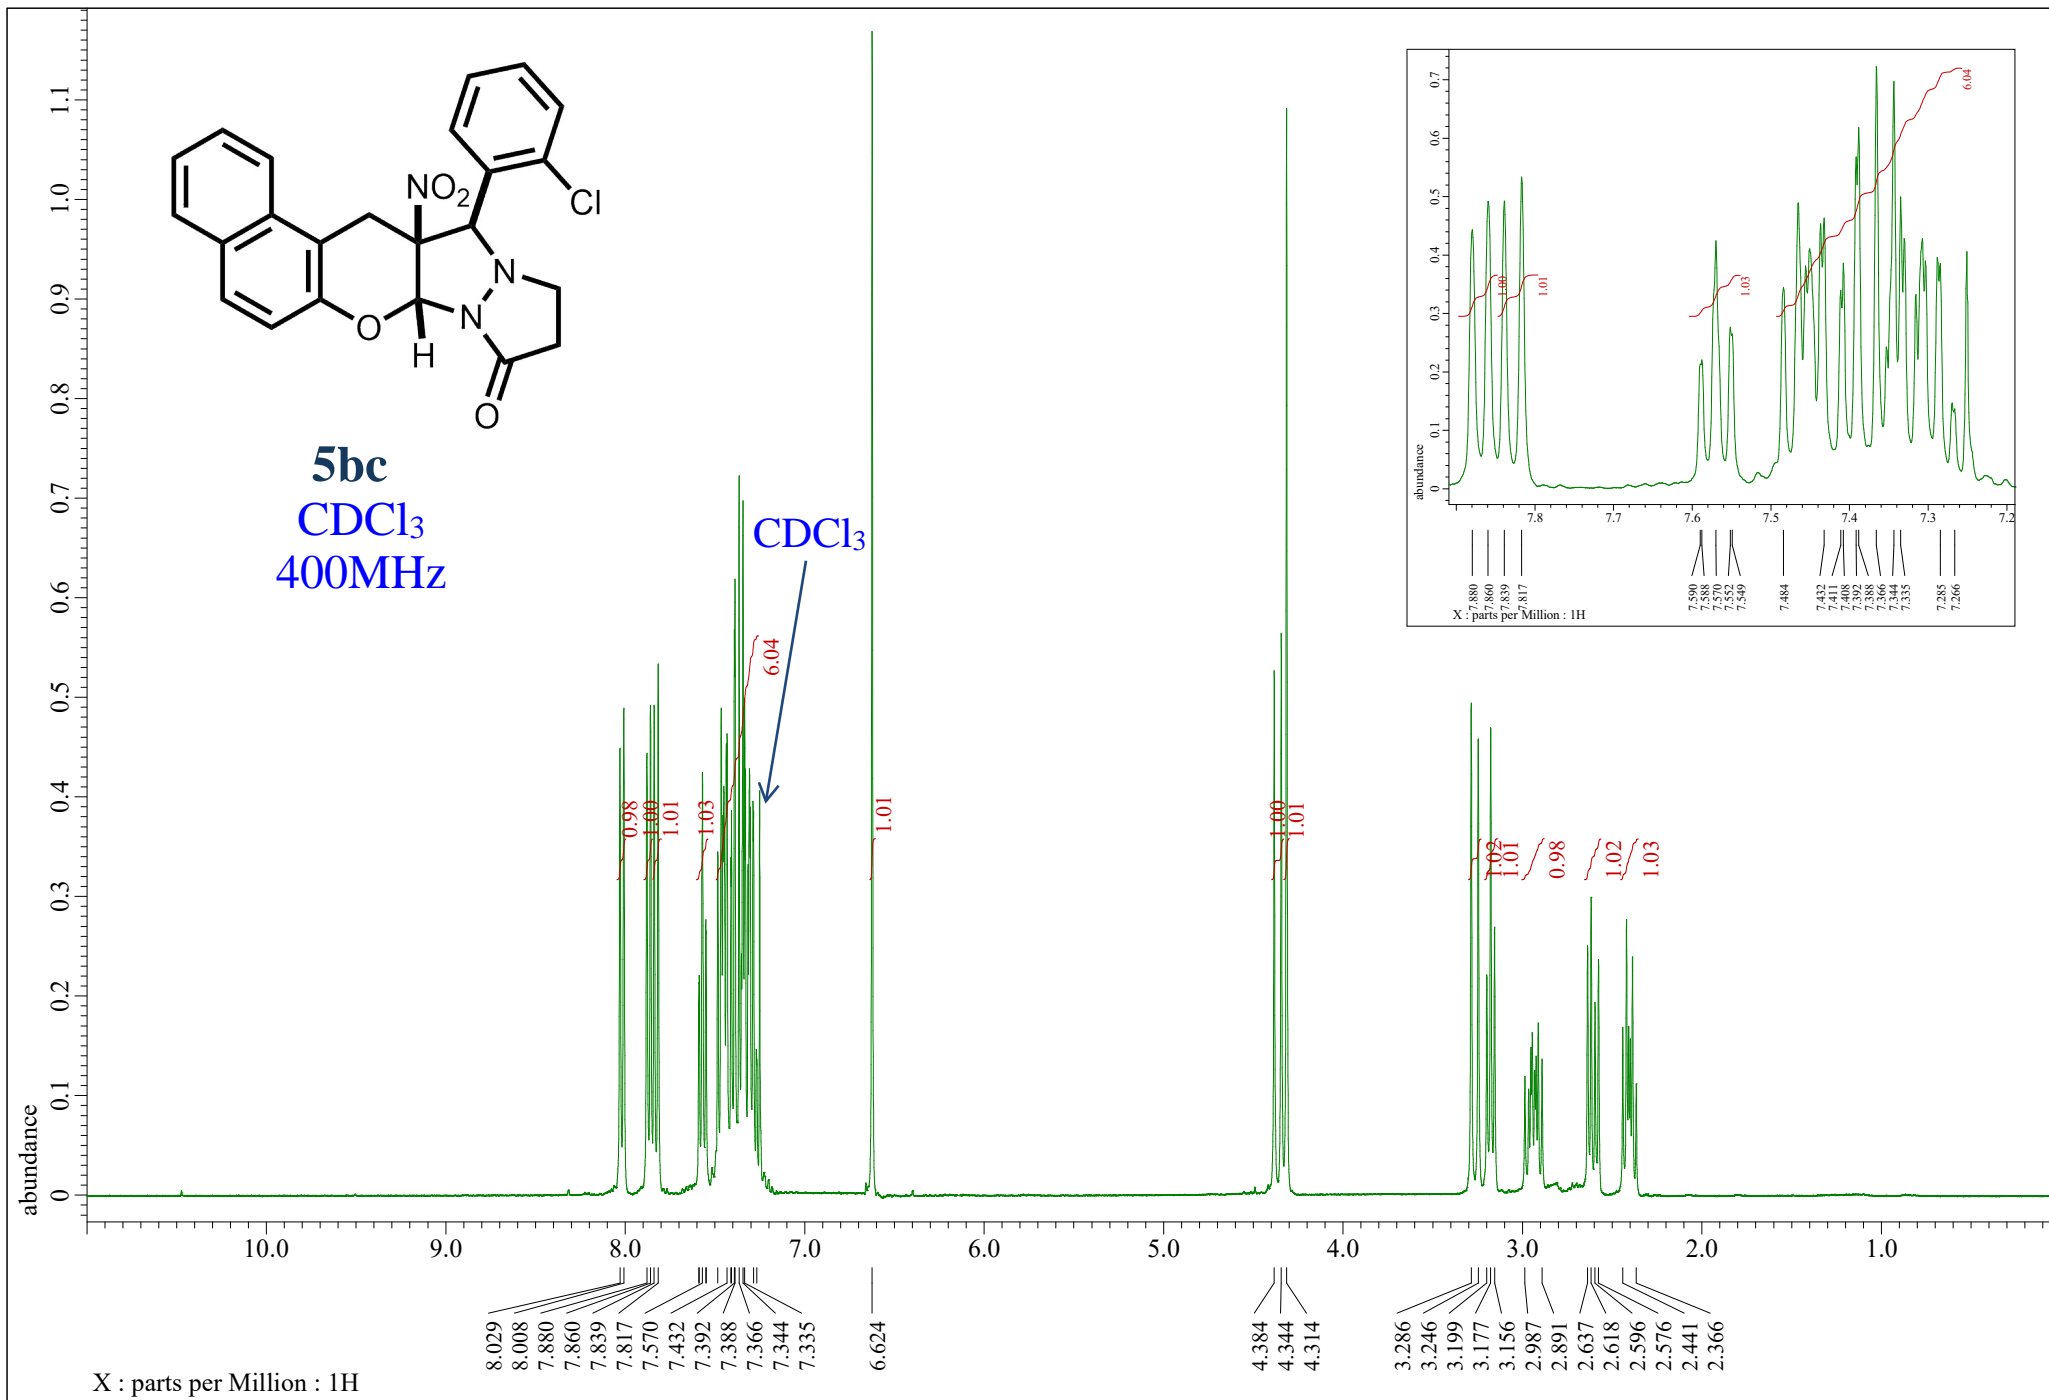



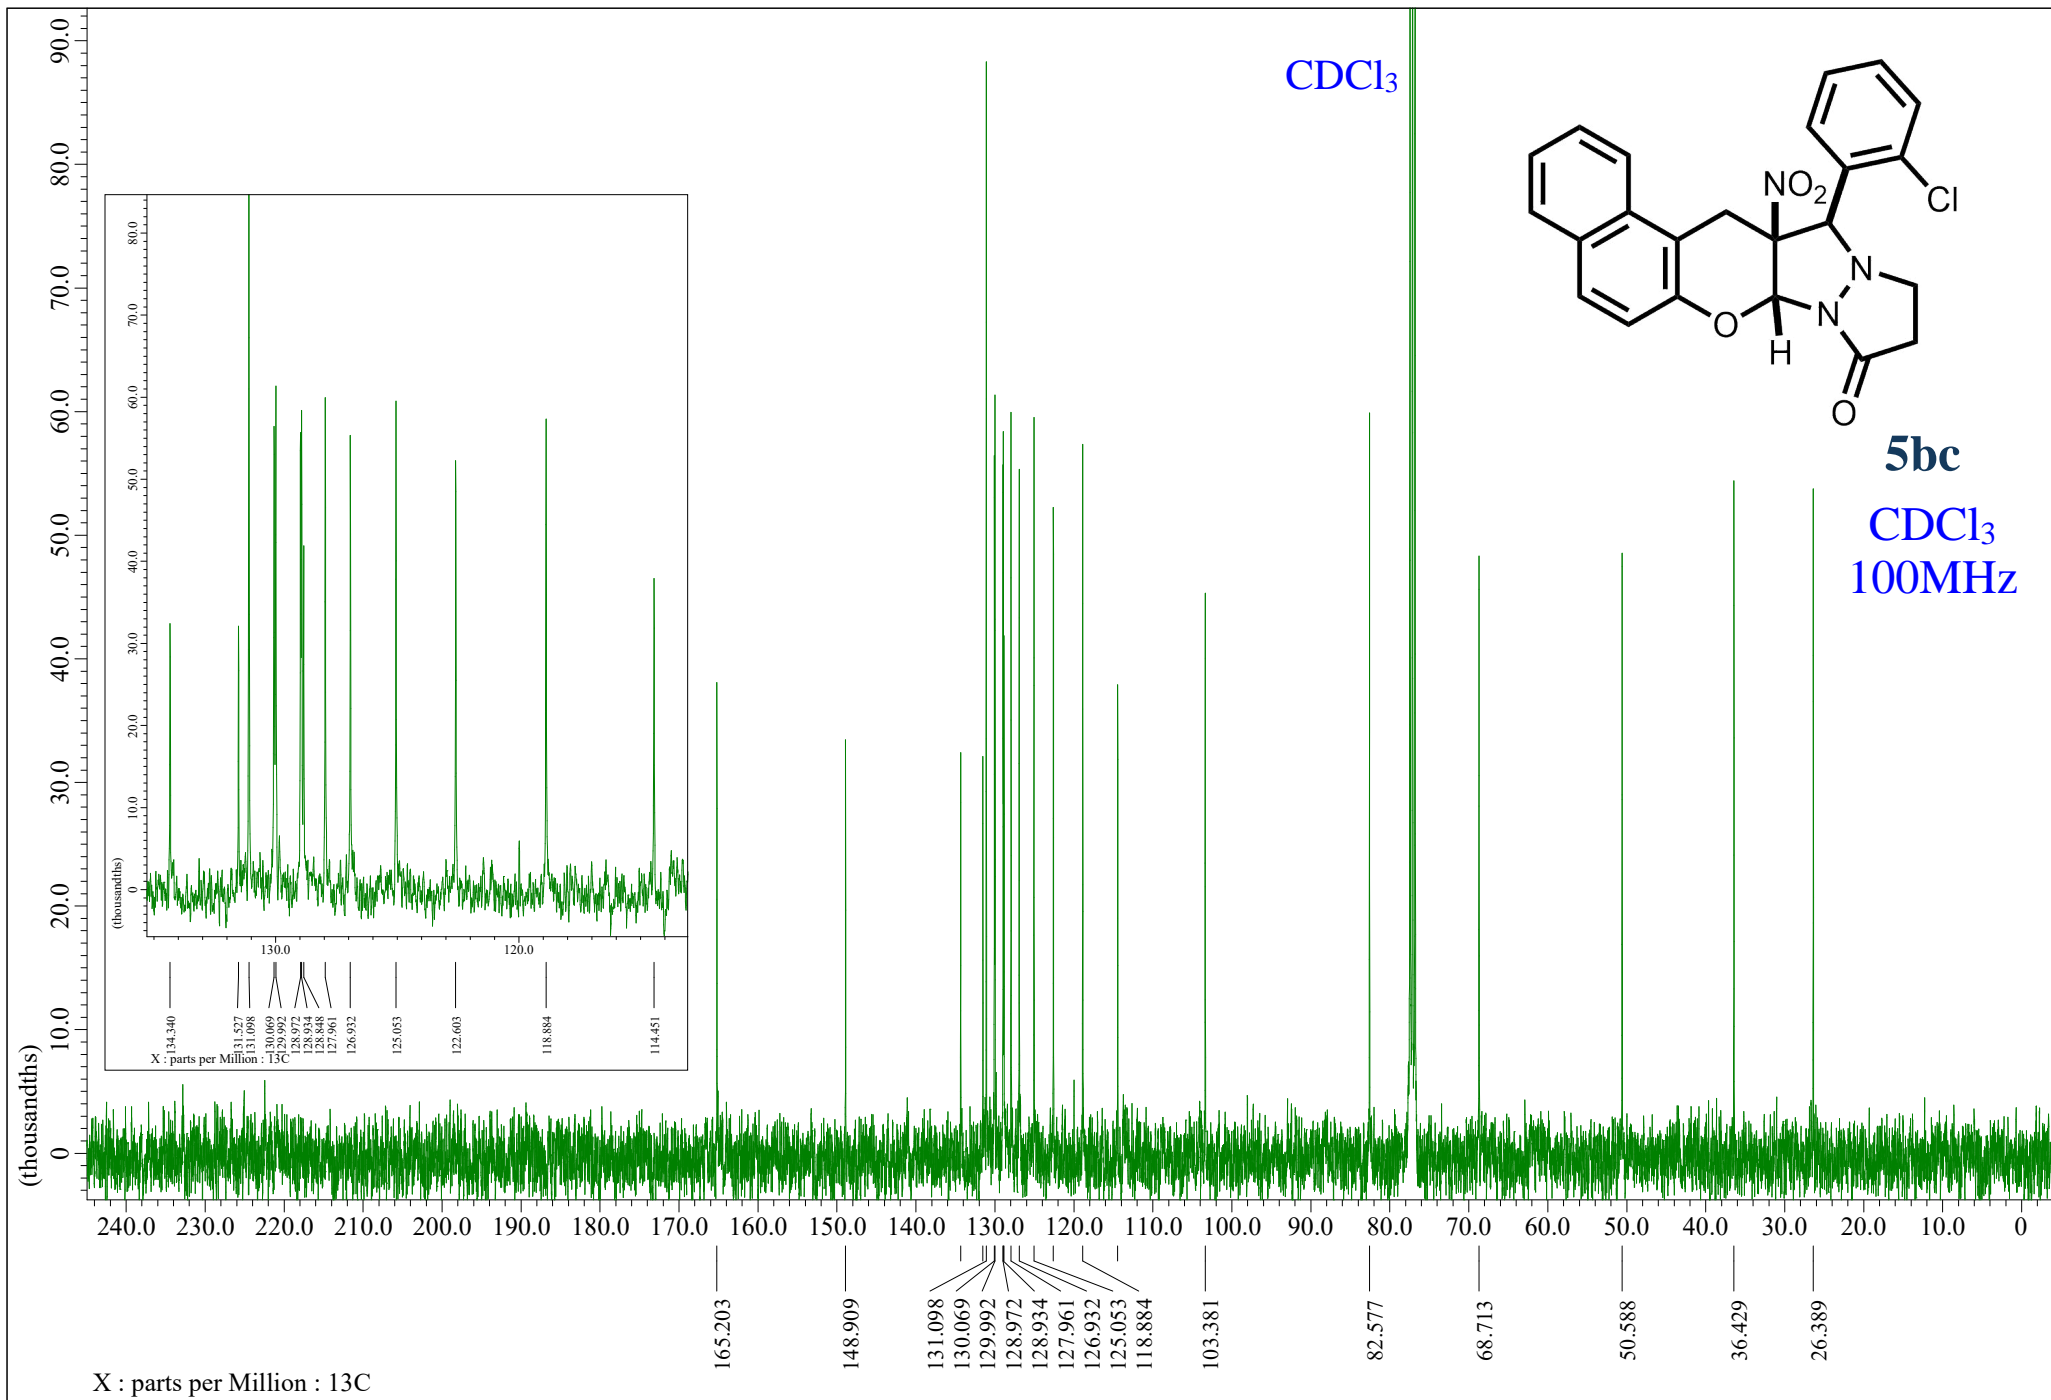

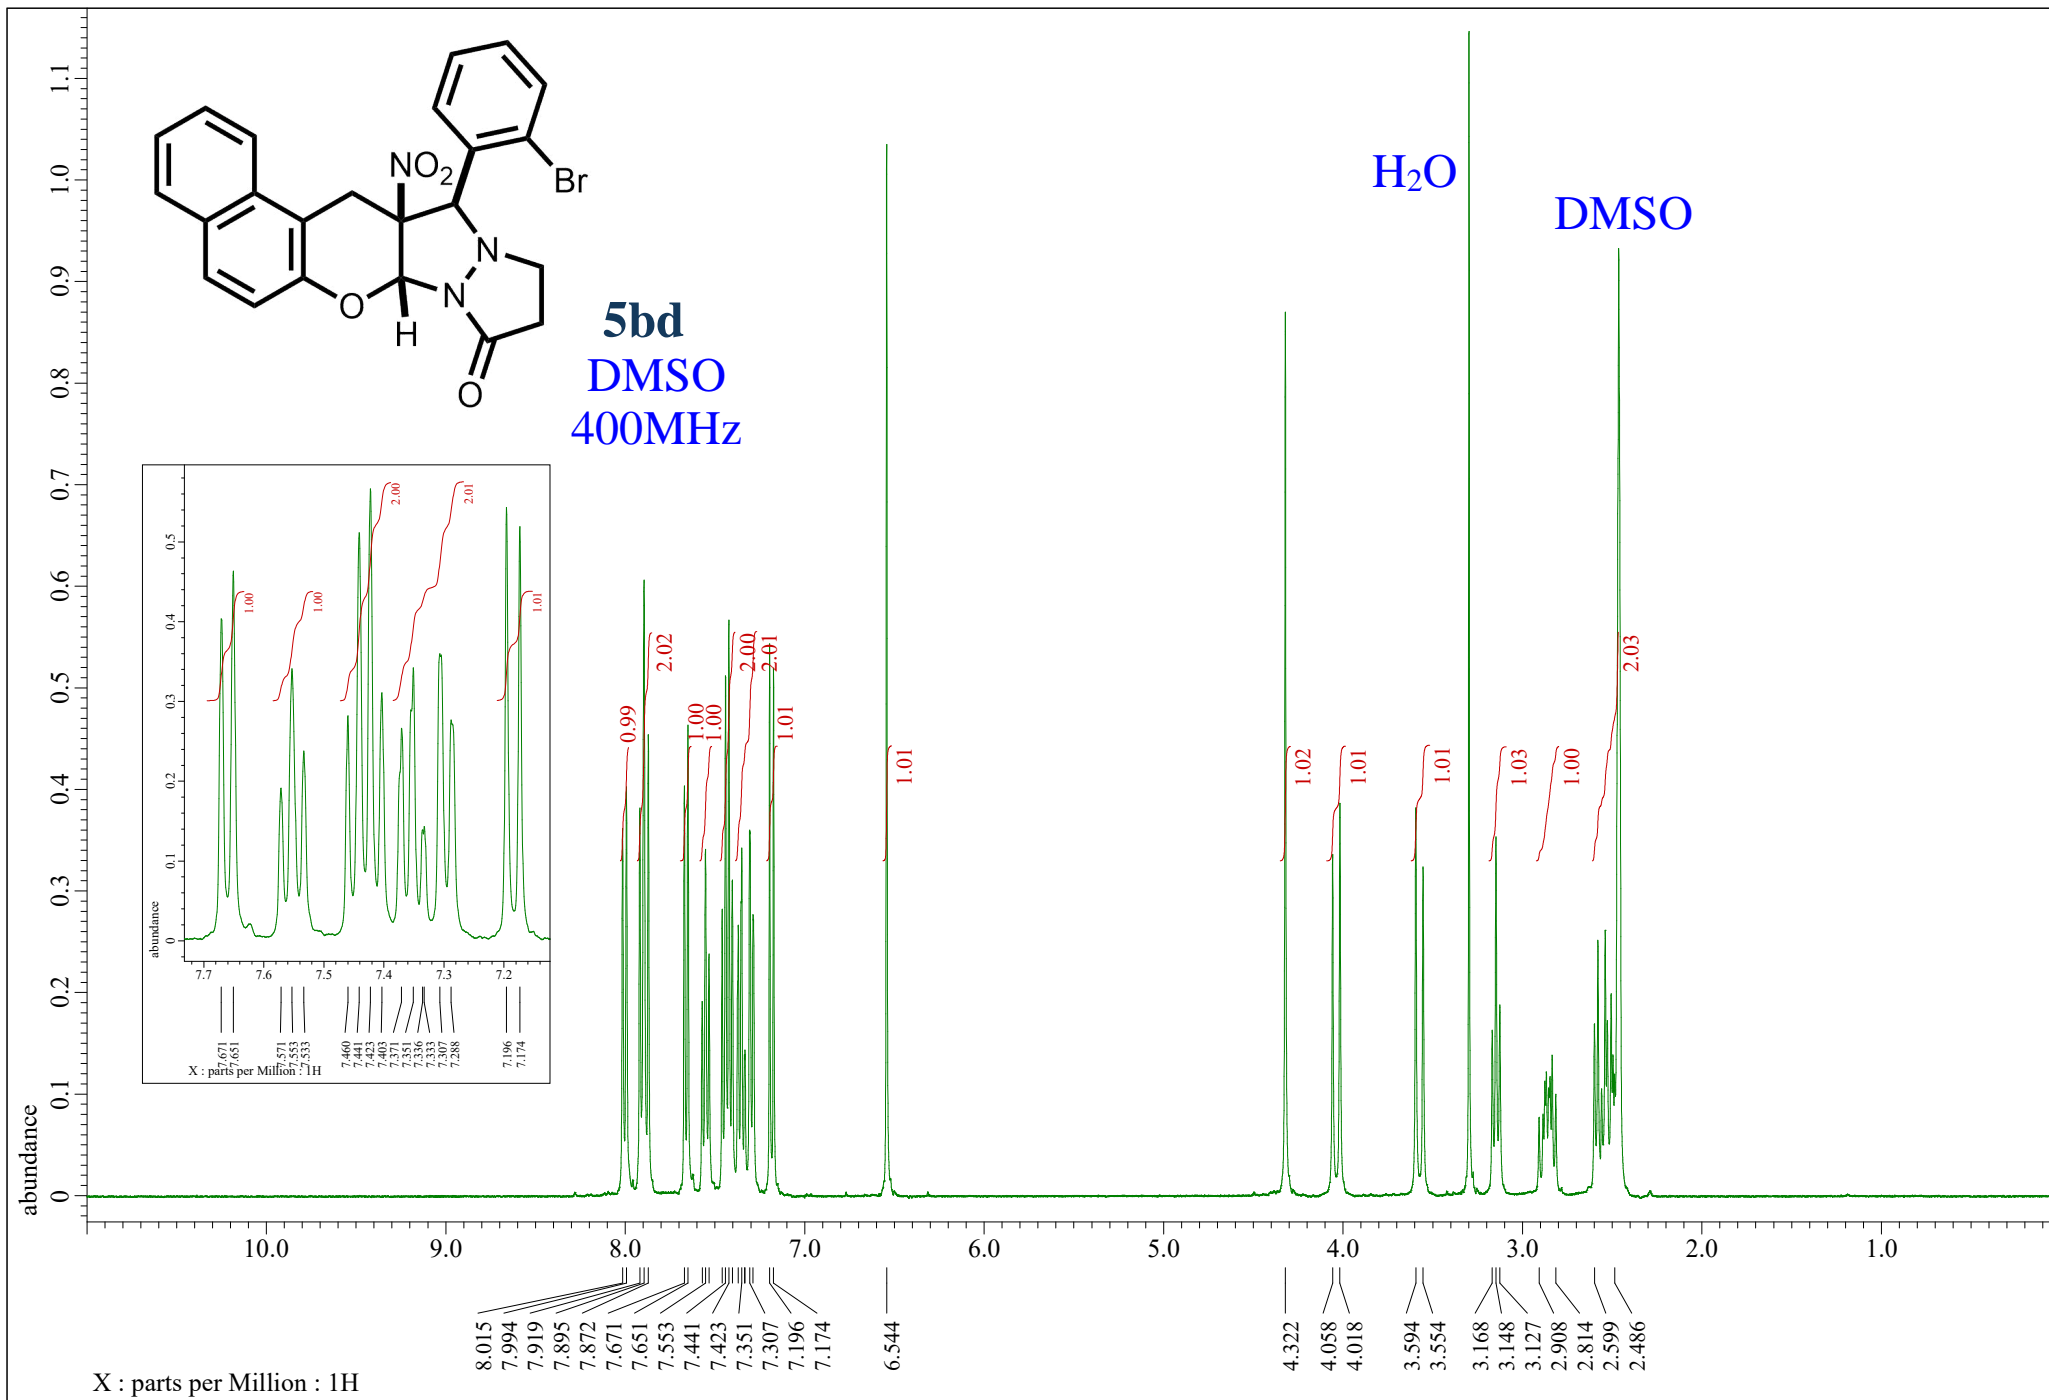

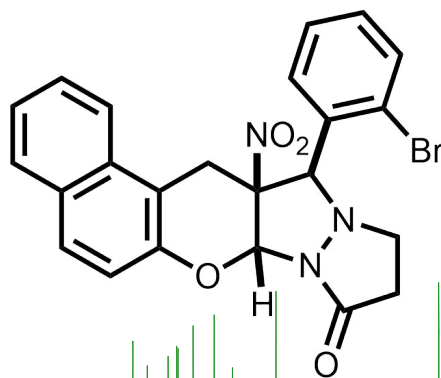

5bd  
DMSO  
100MHz

DMSO

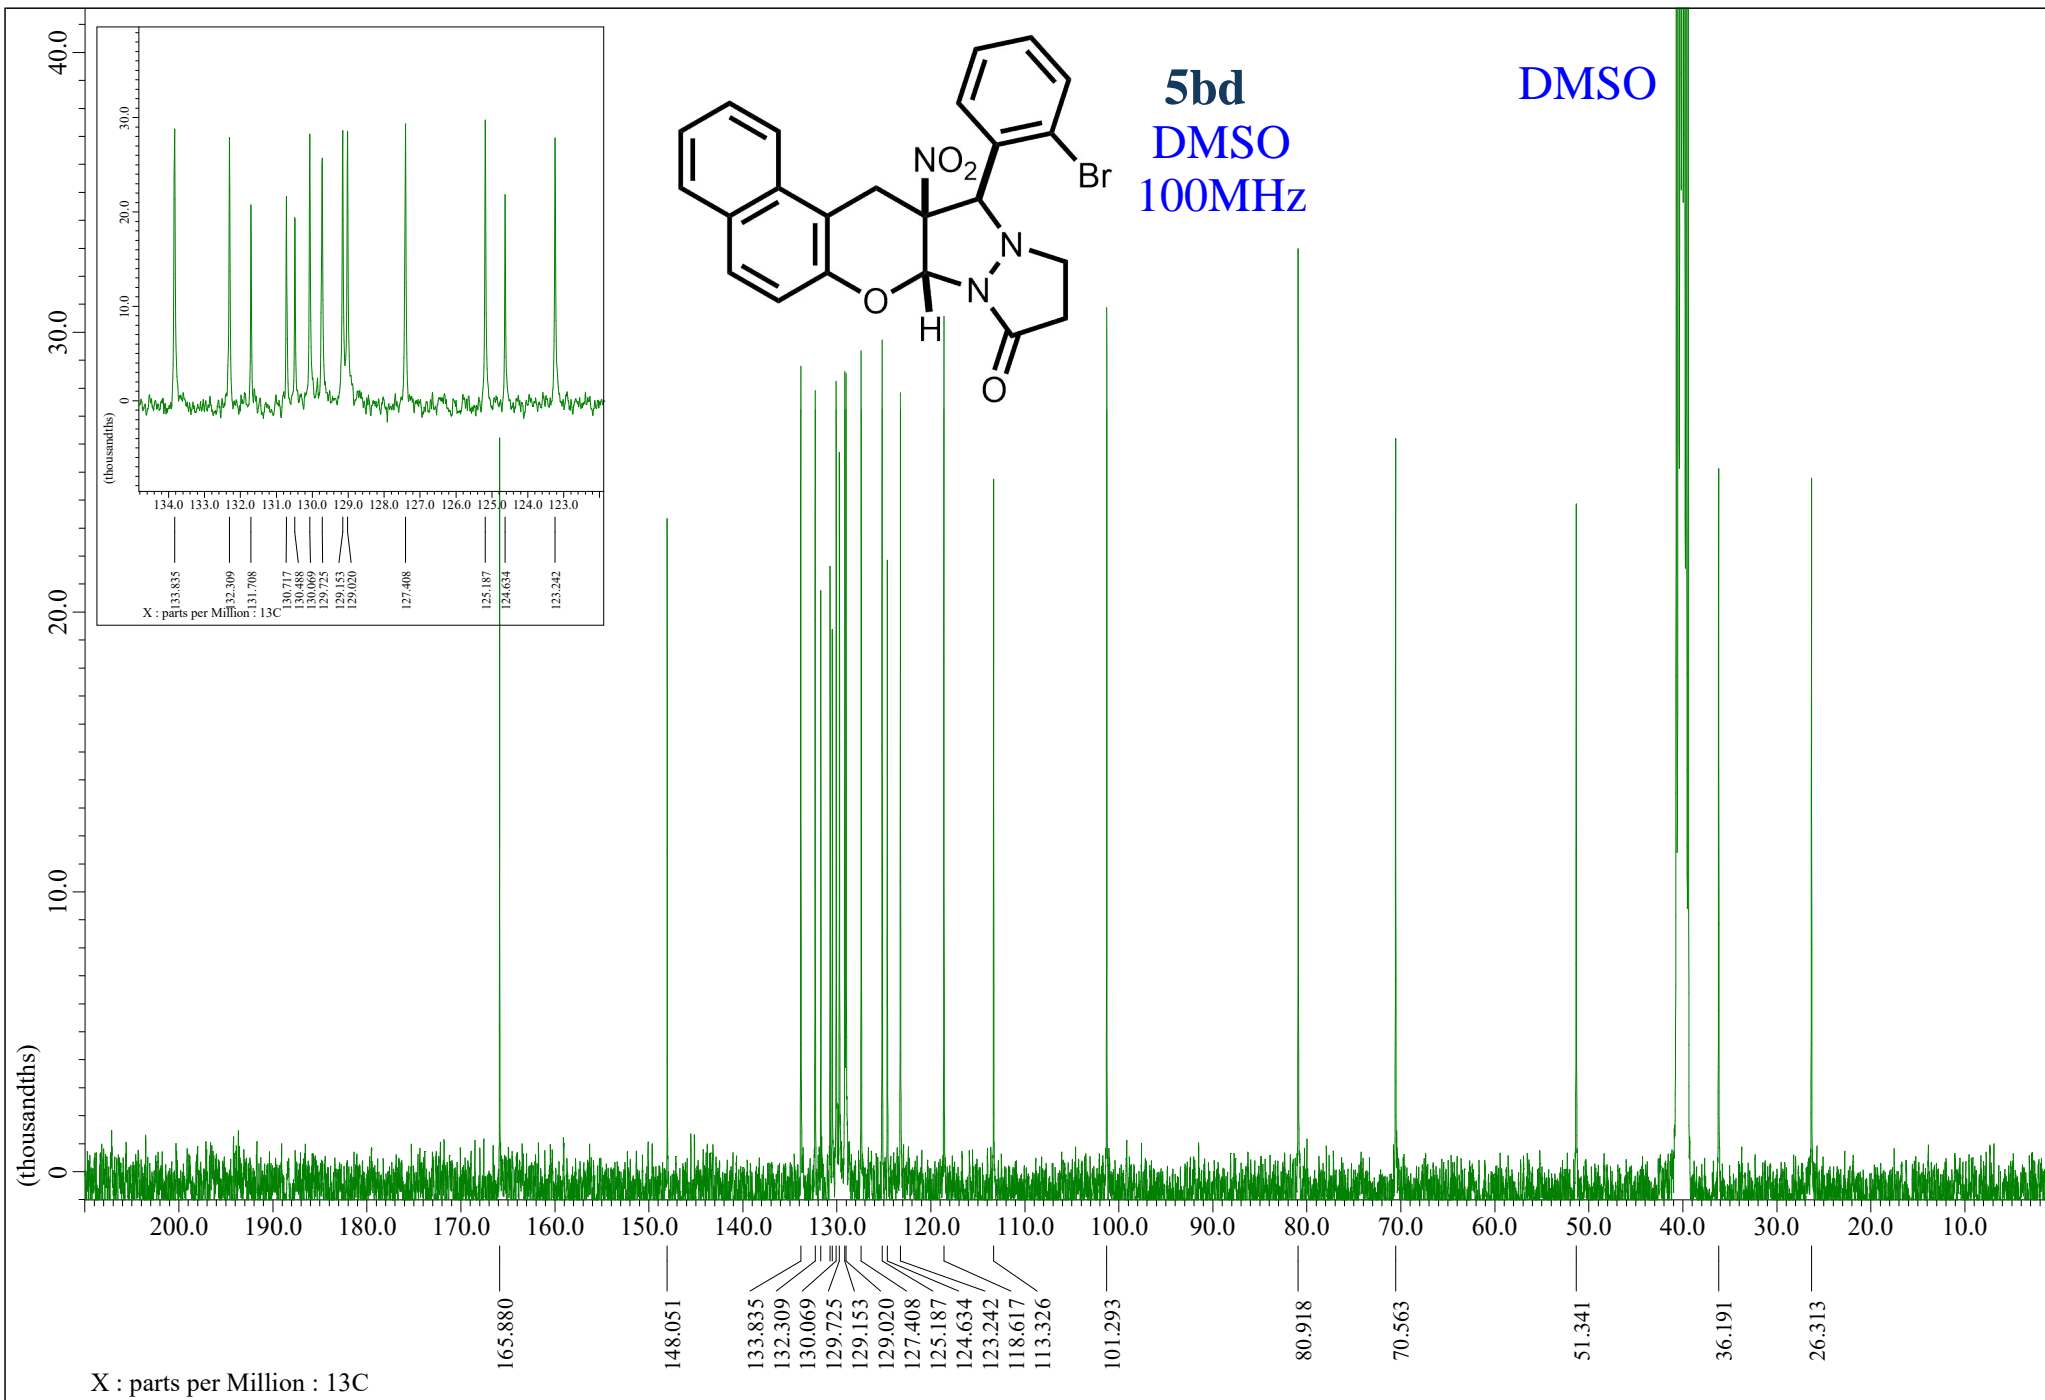

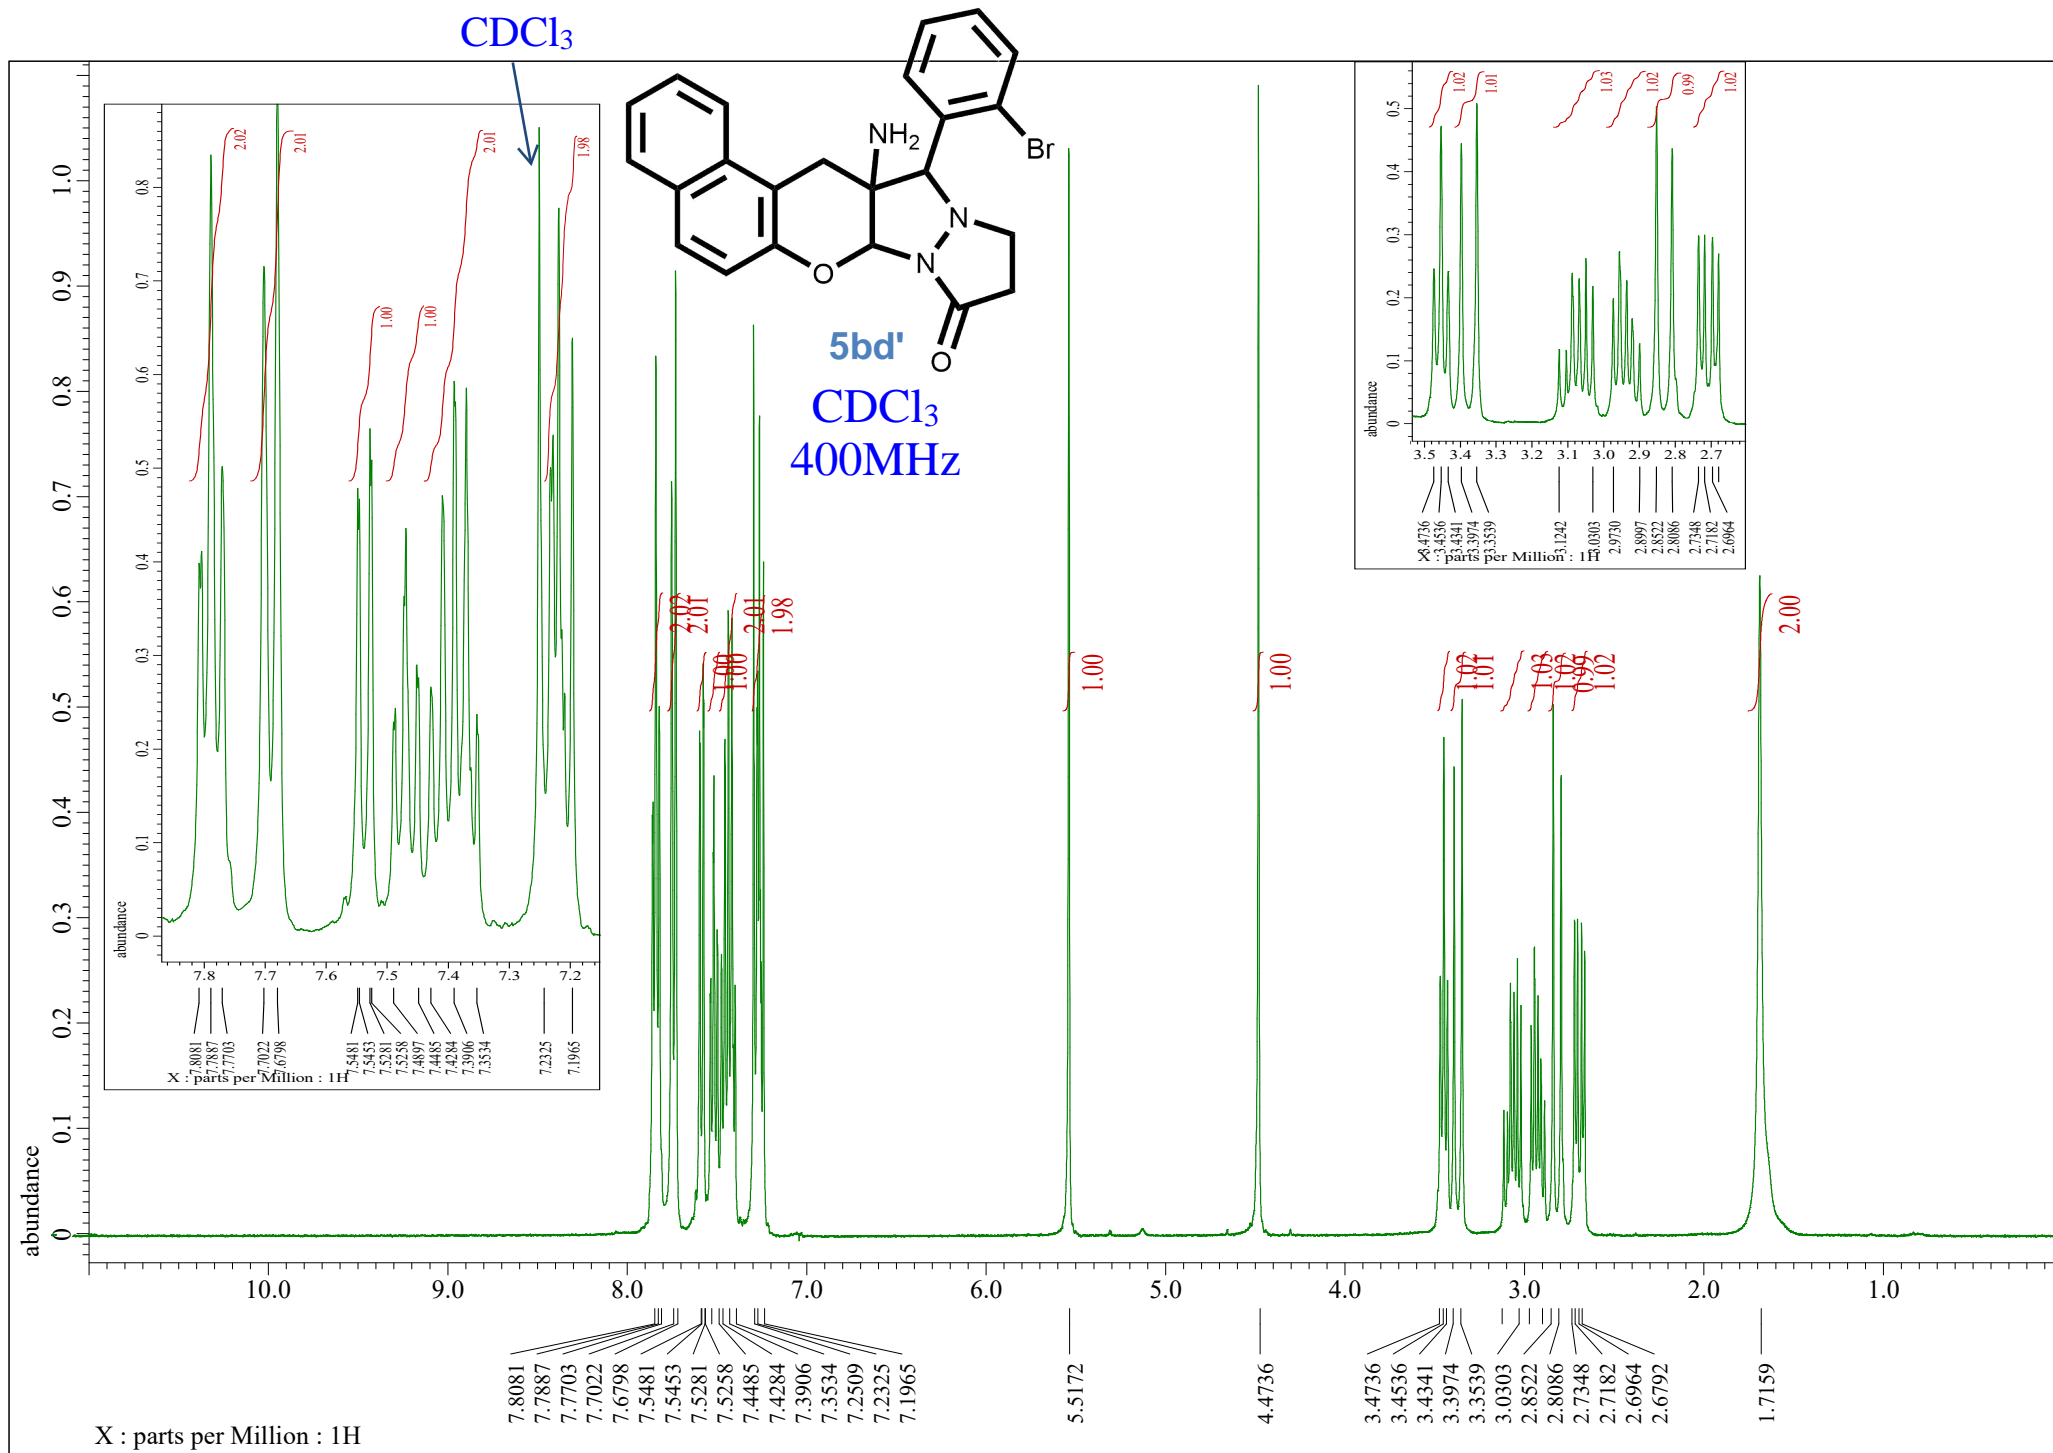

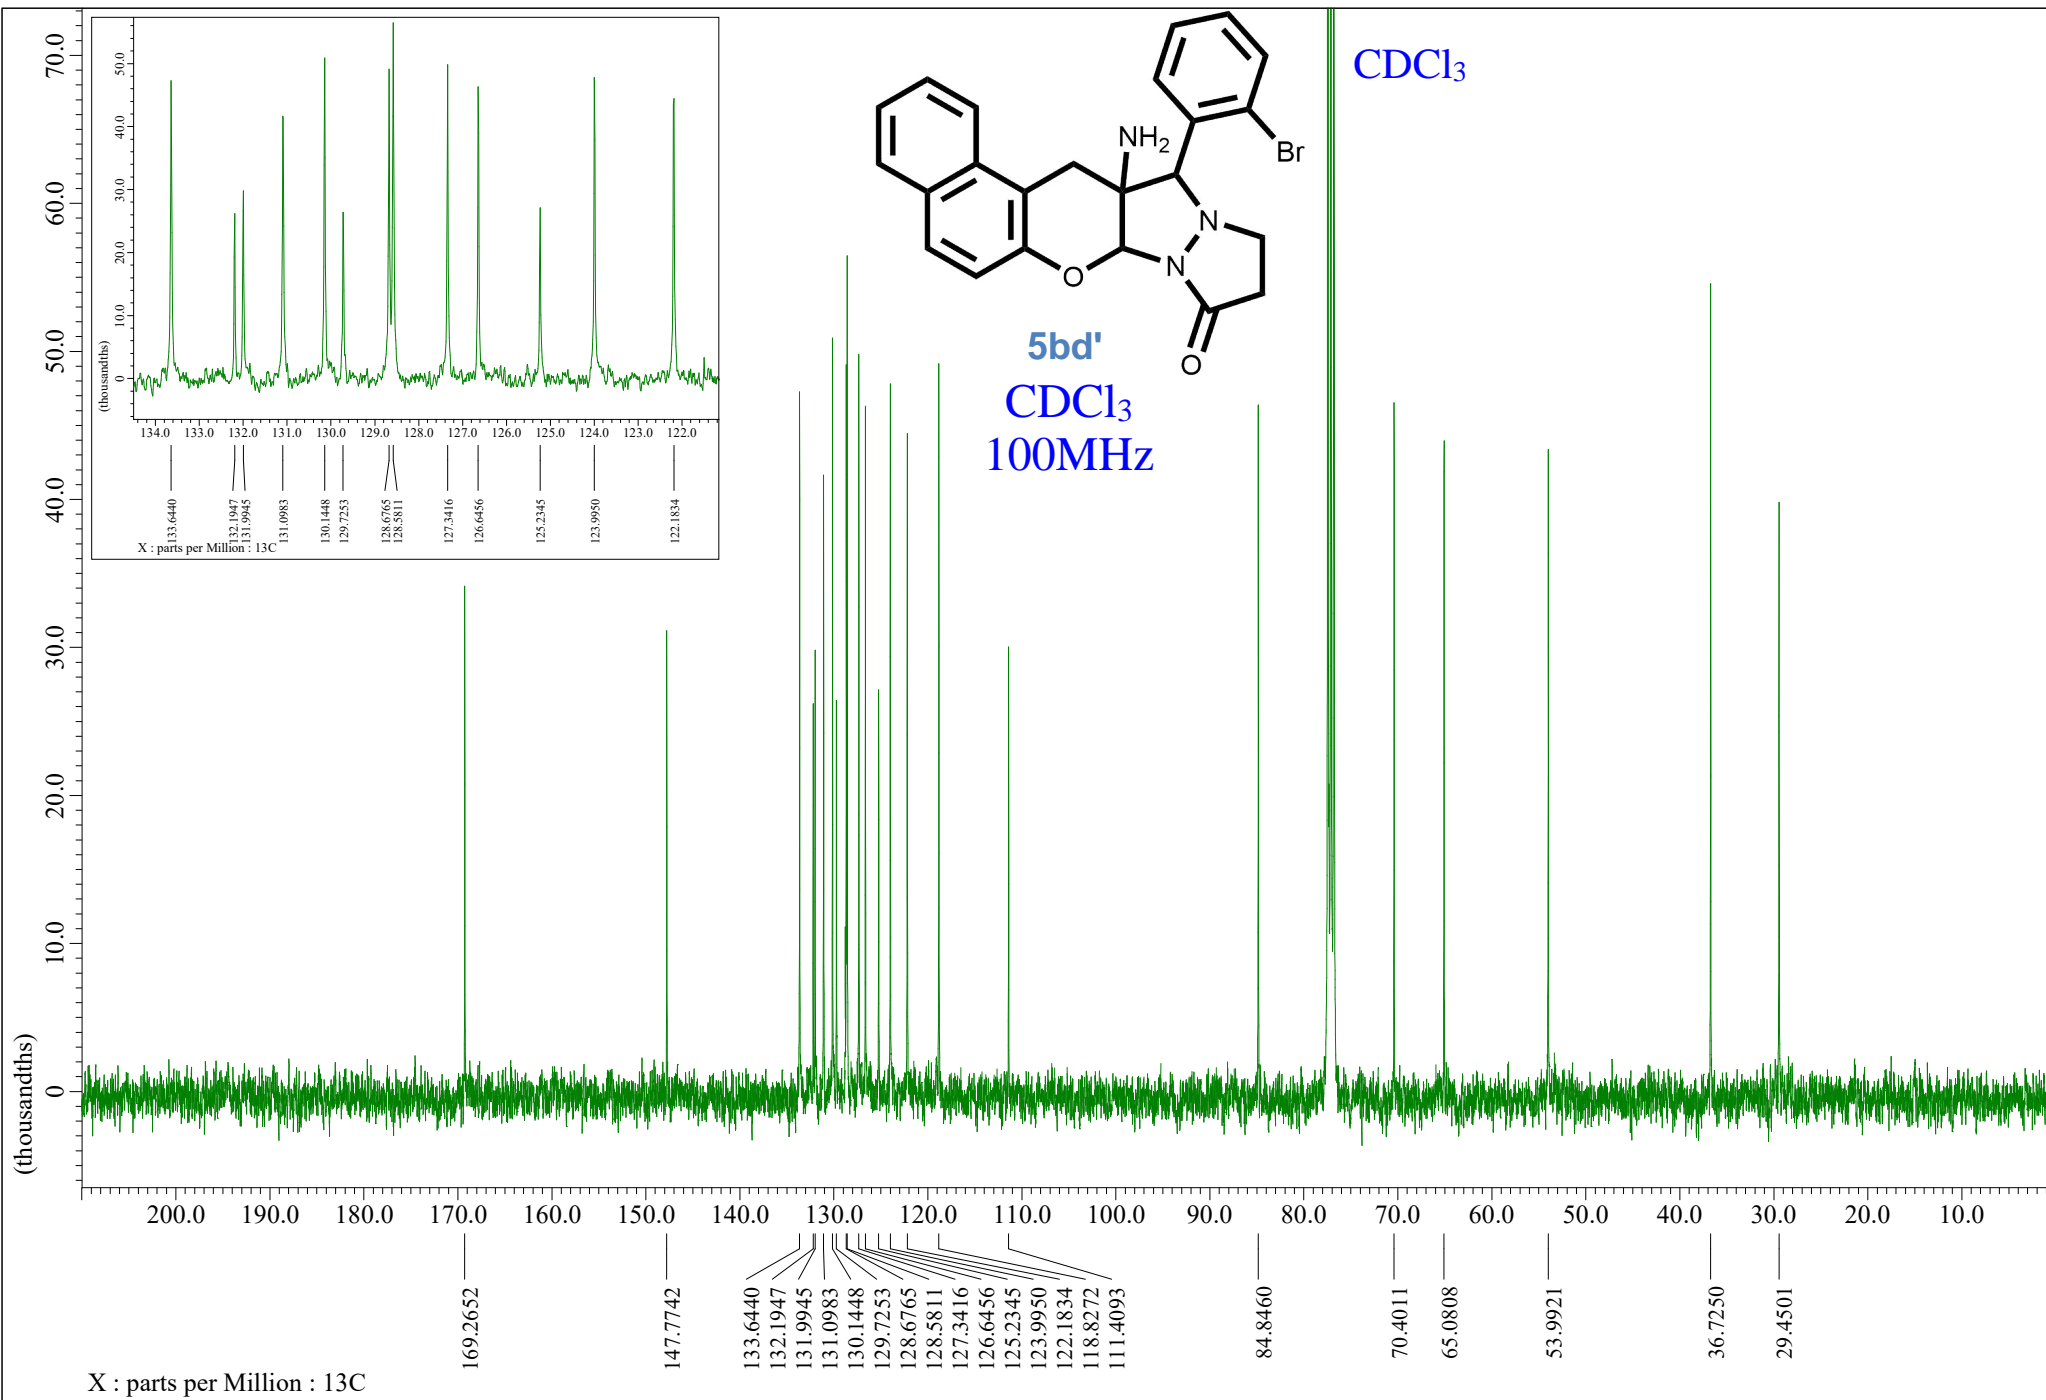

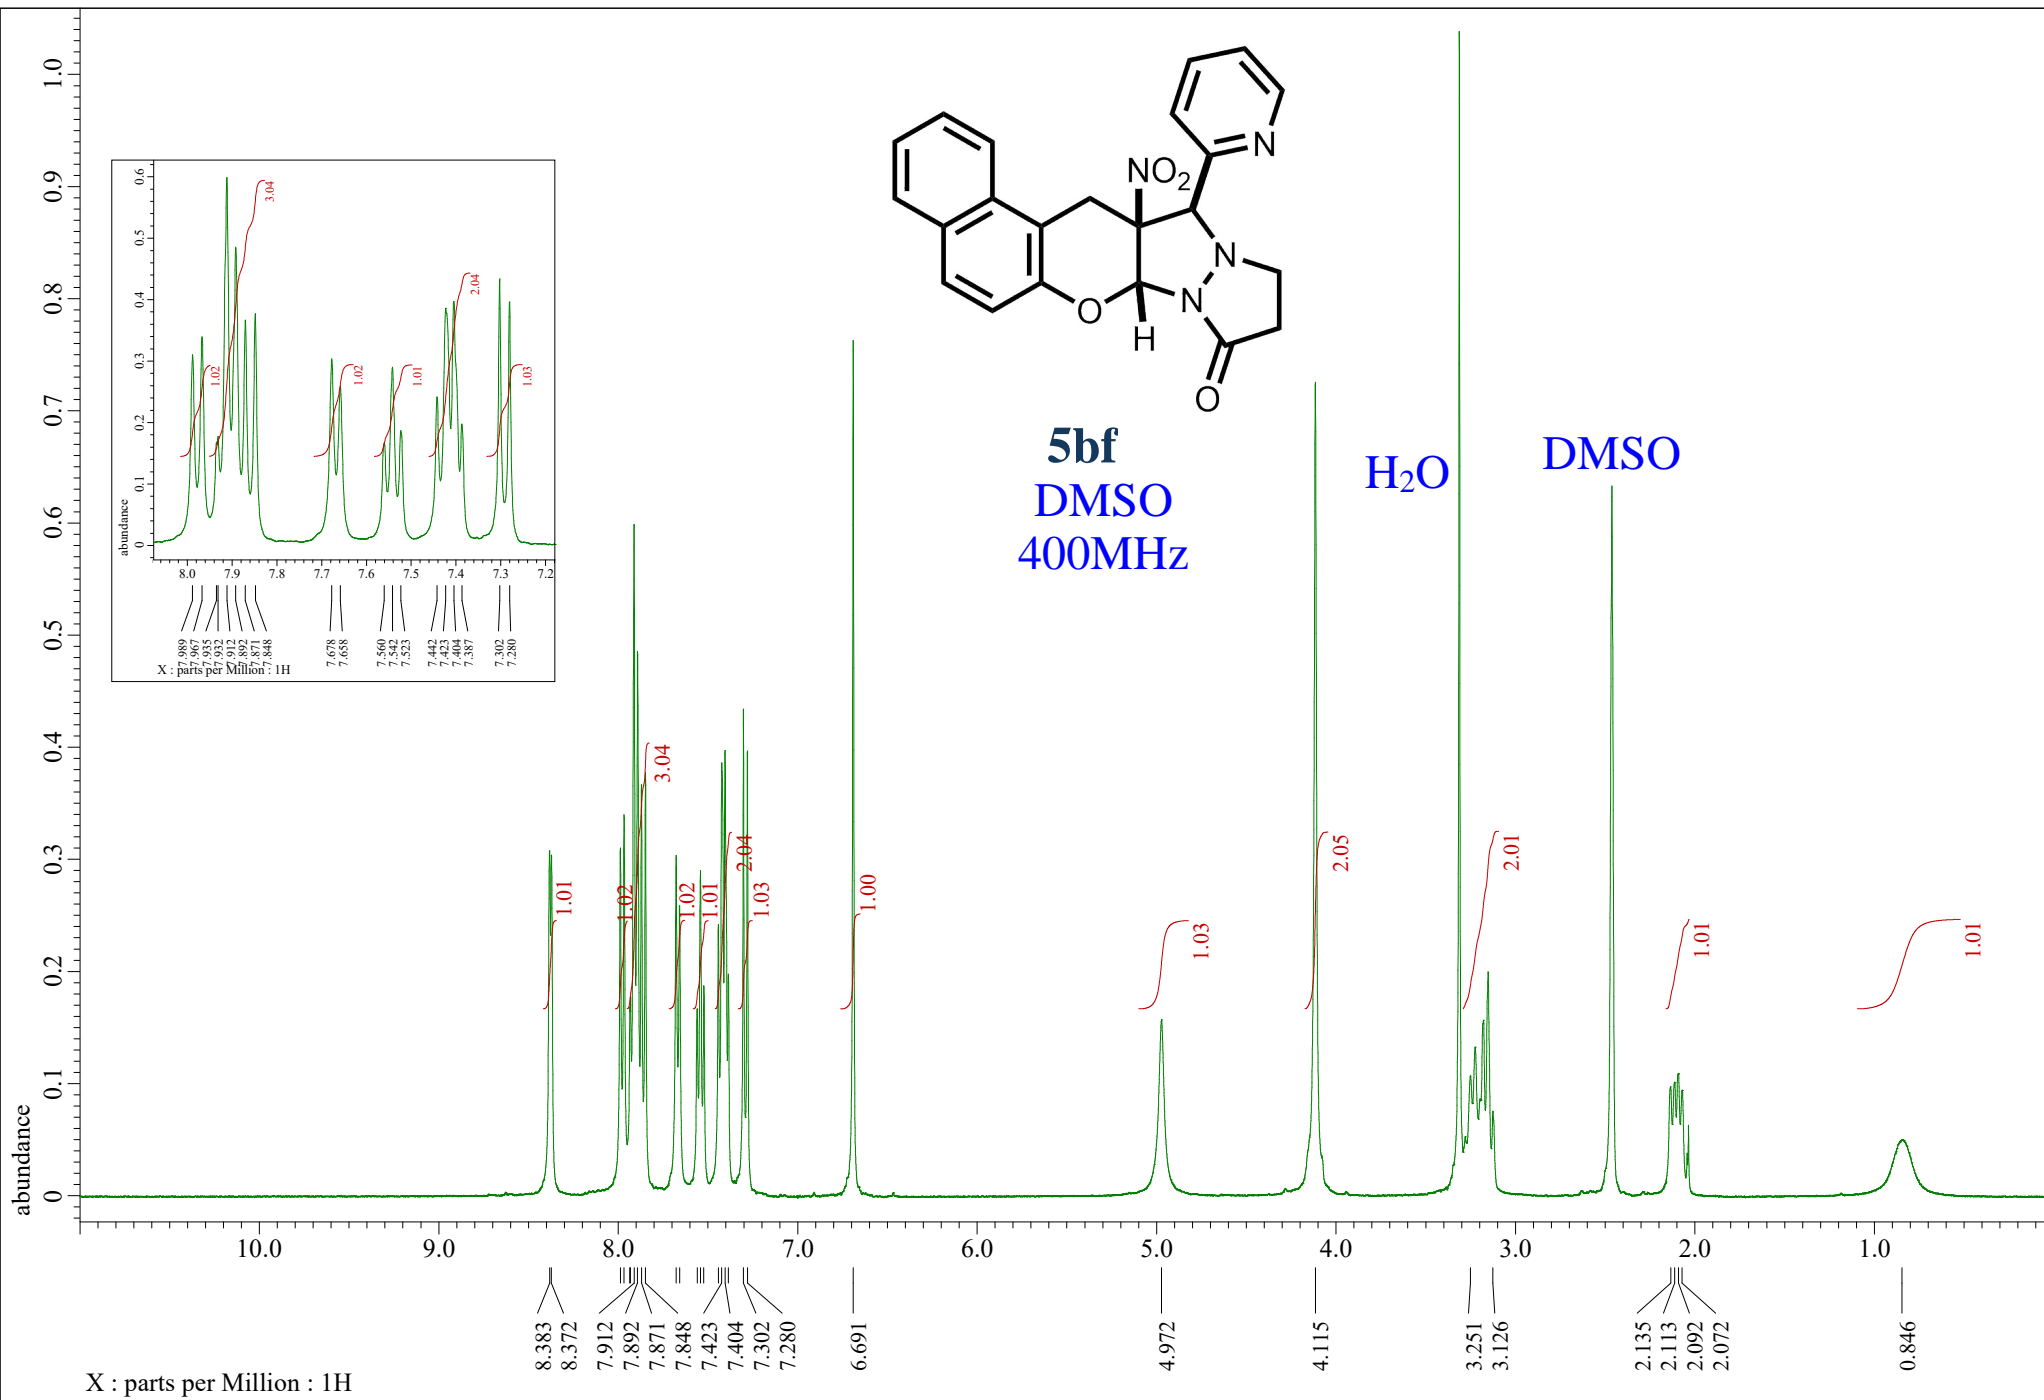



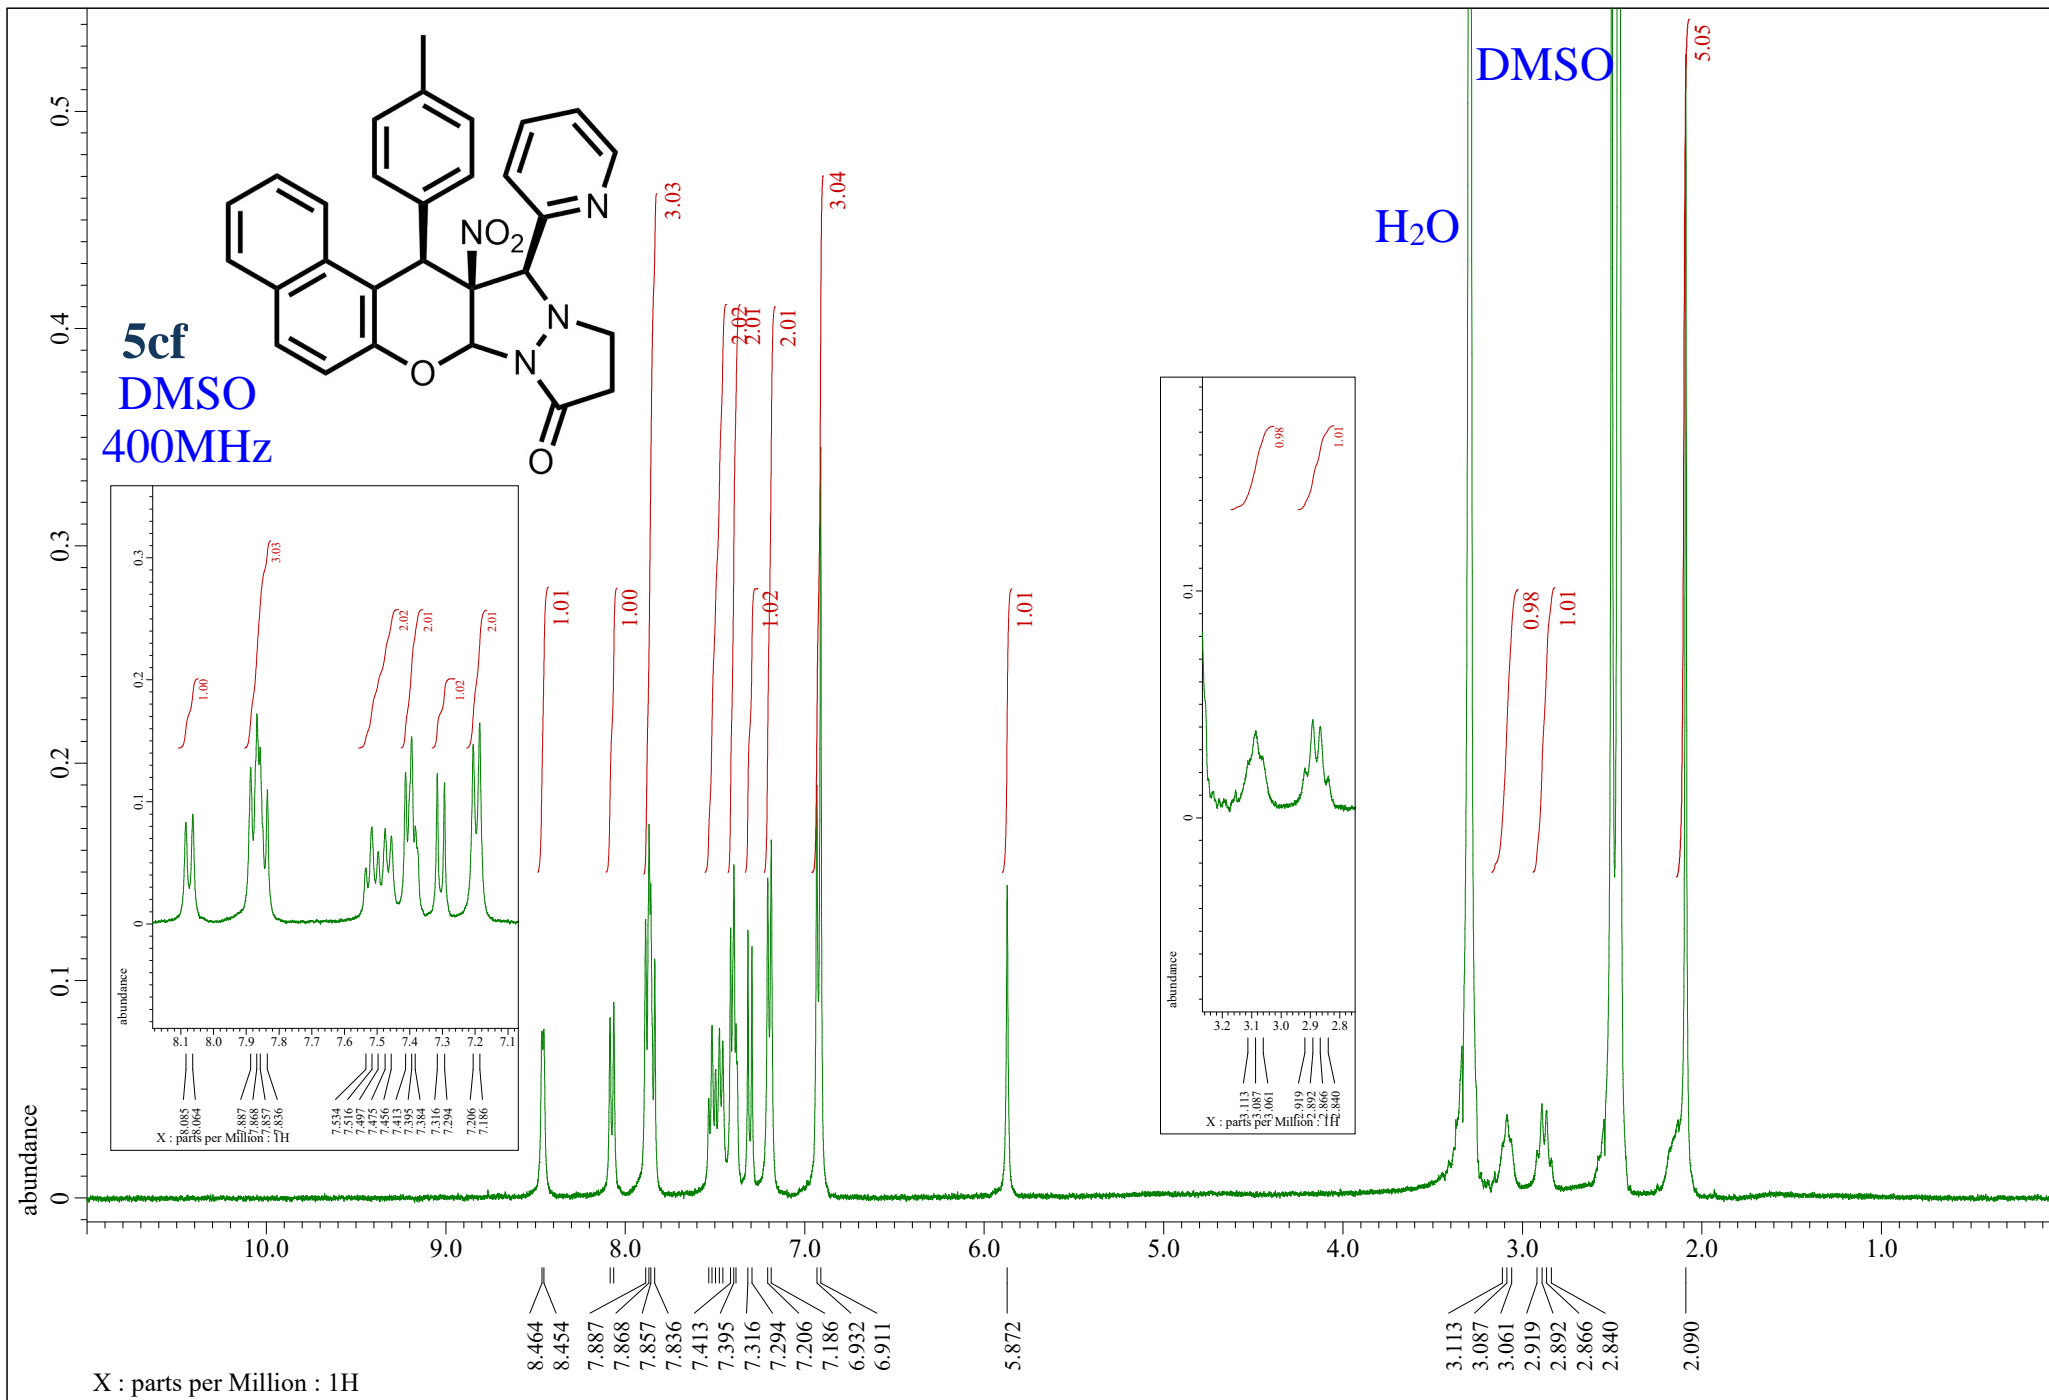



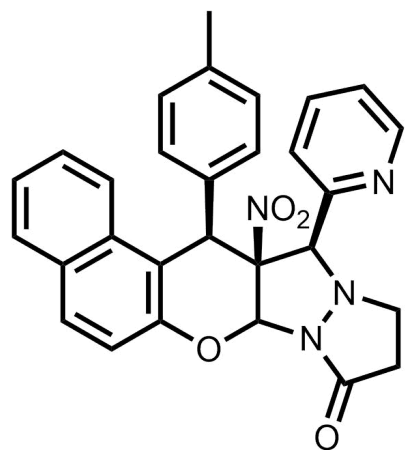

**5cf**  
**DMSO**  
**100MHz**

DMSO

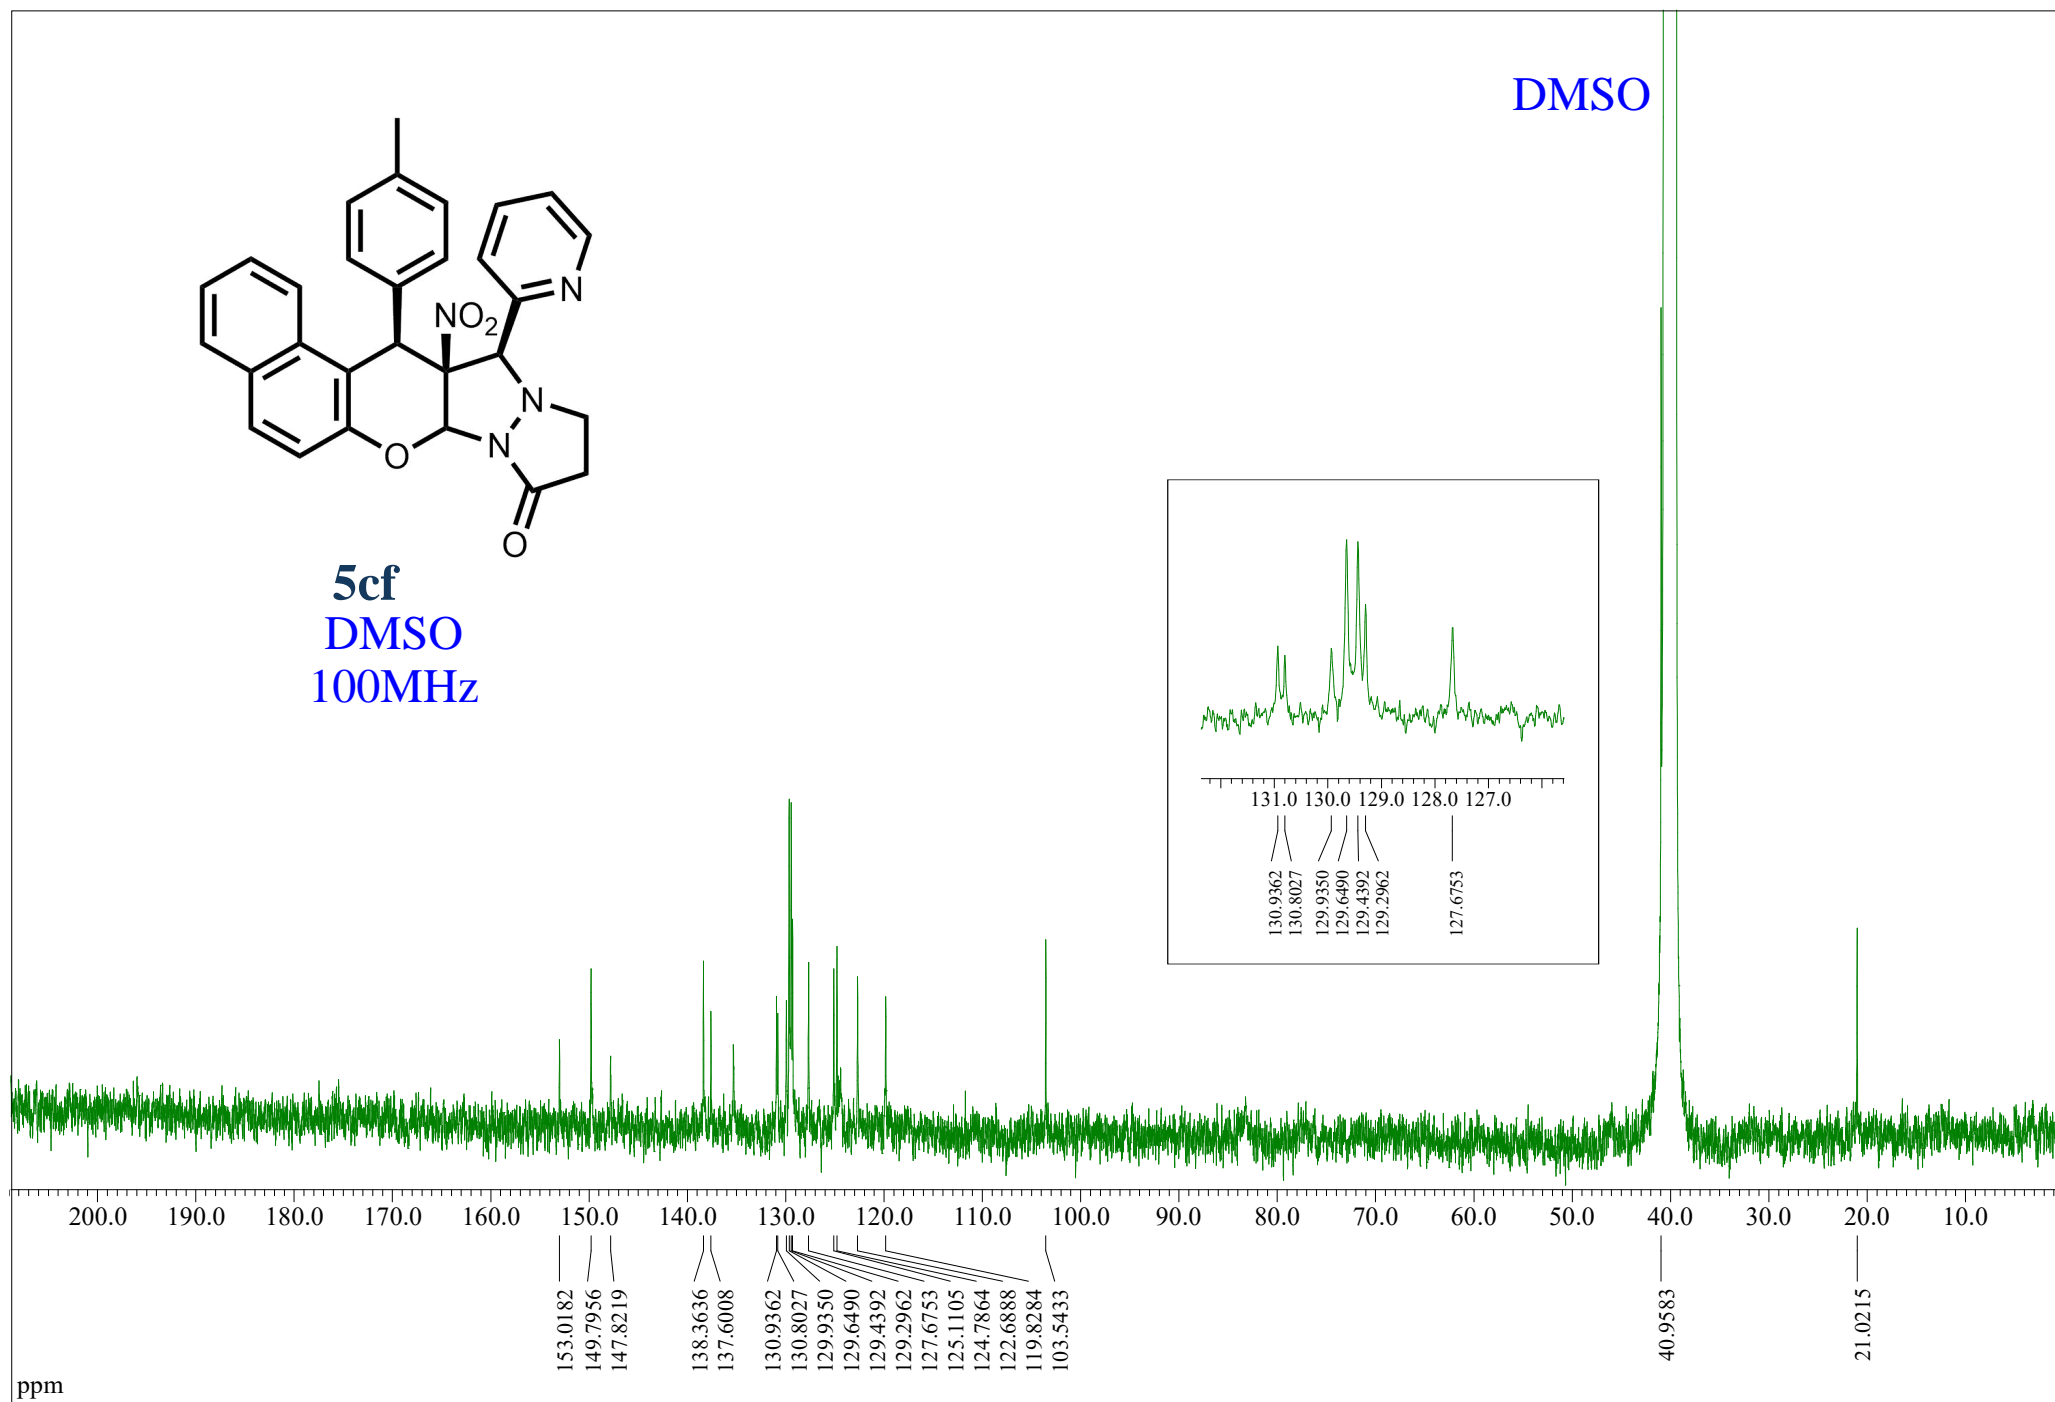

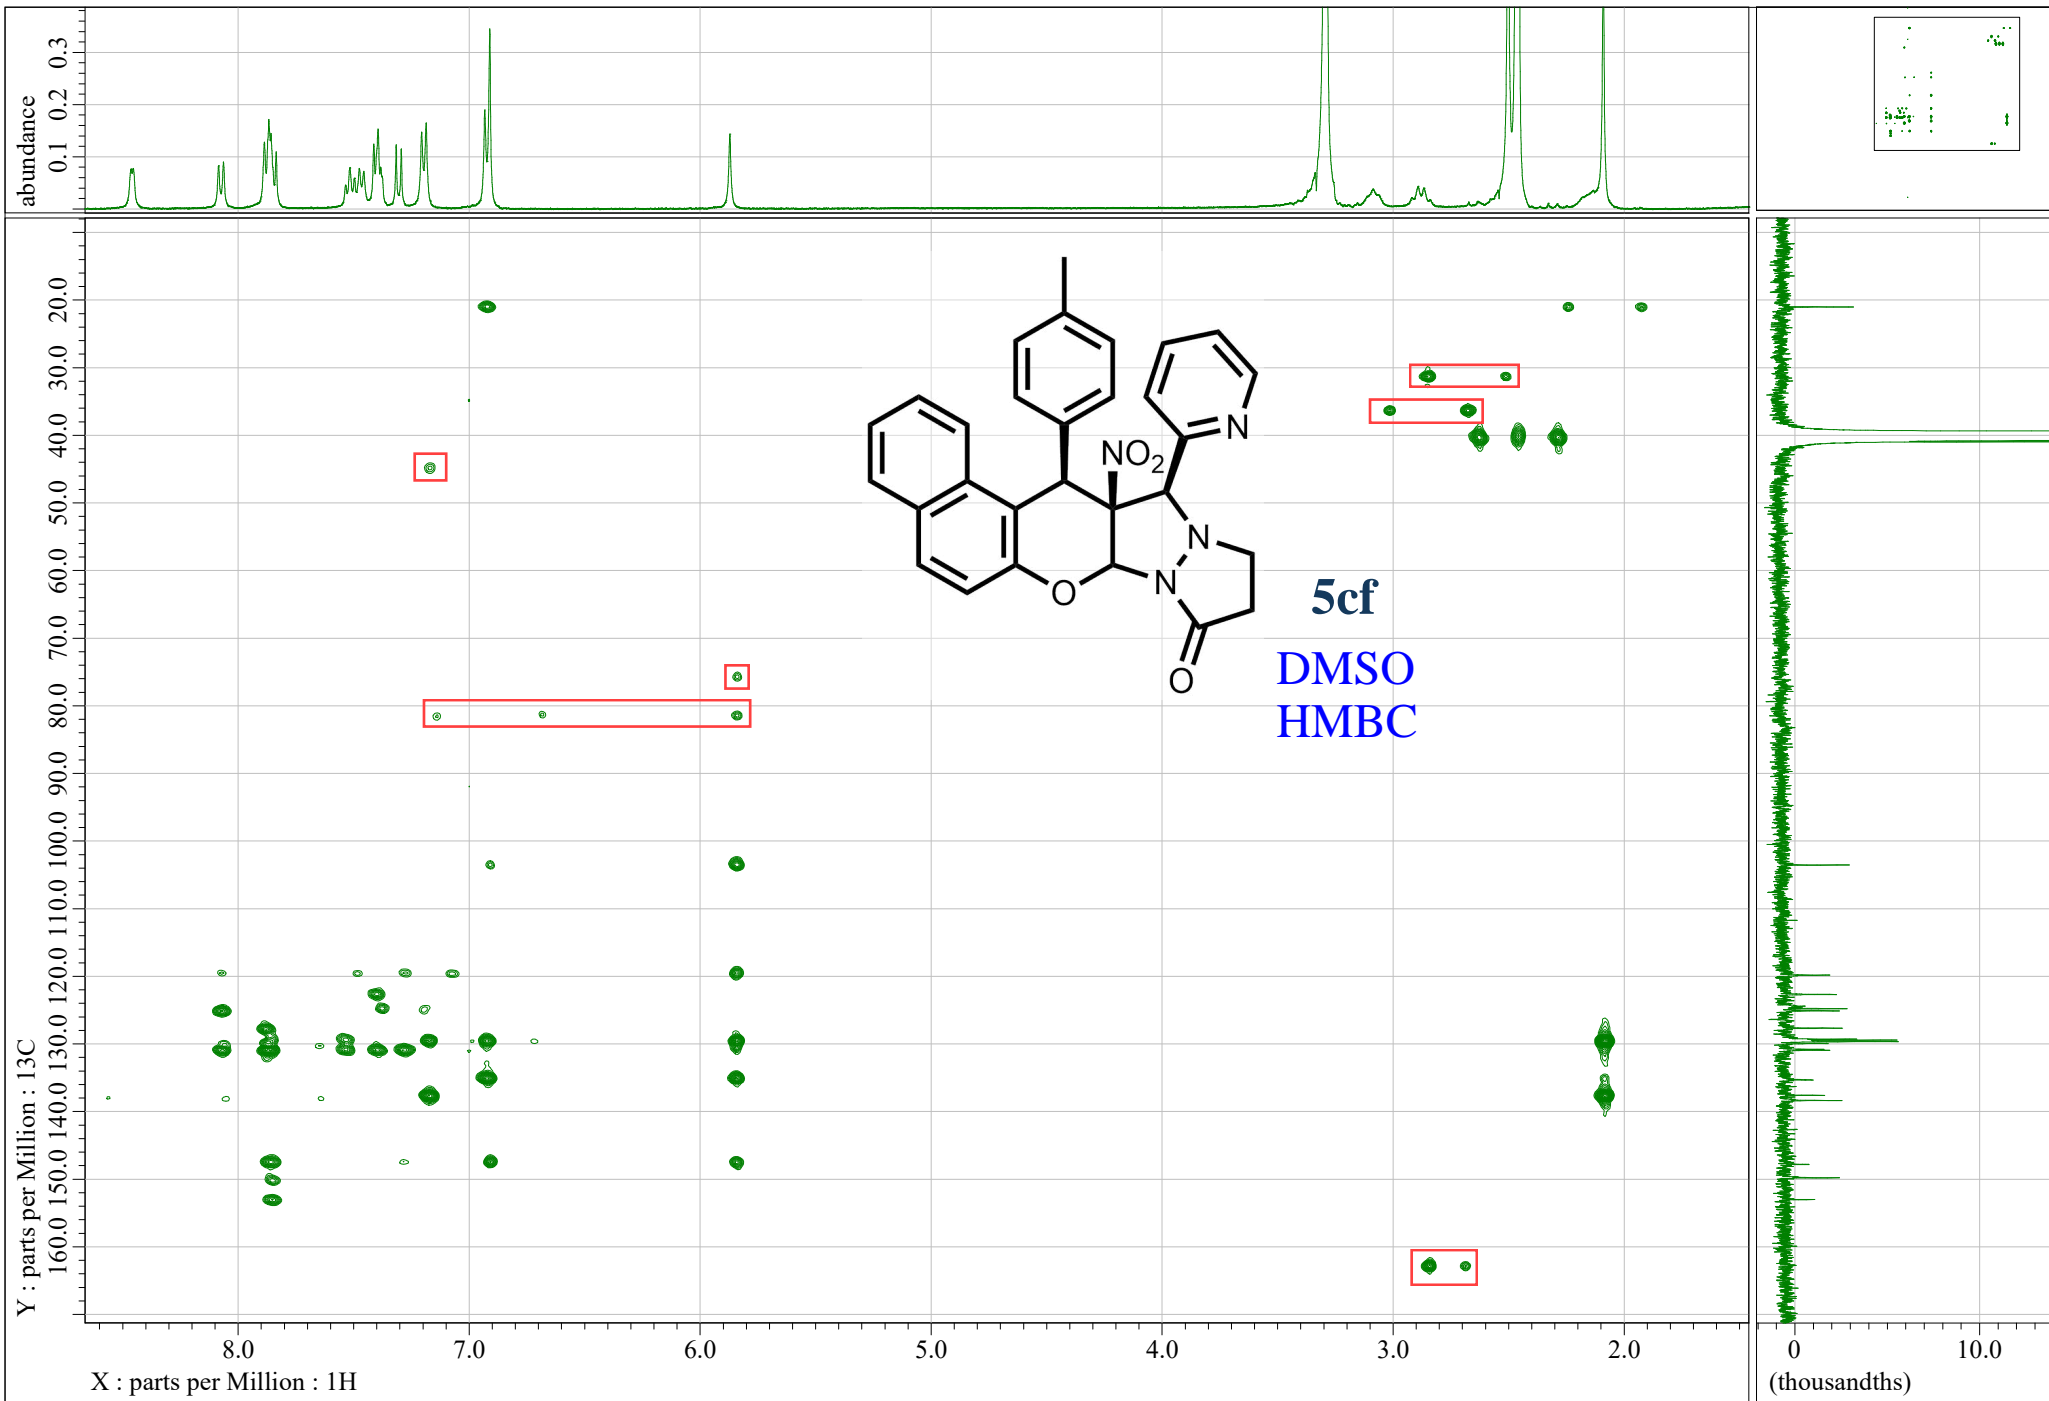

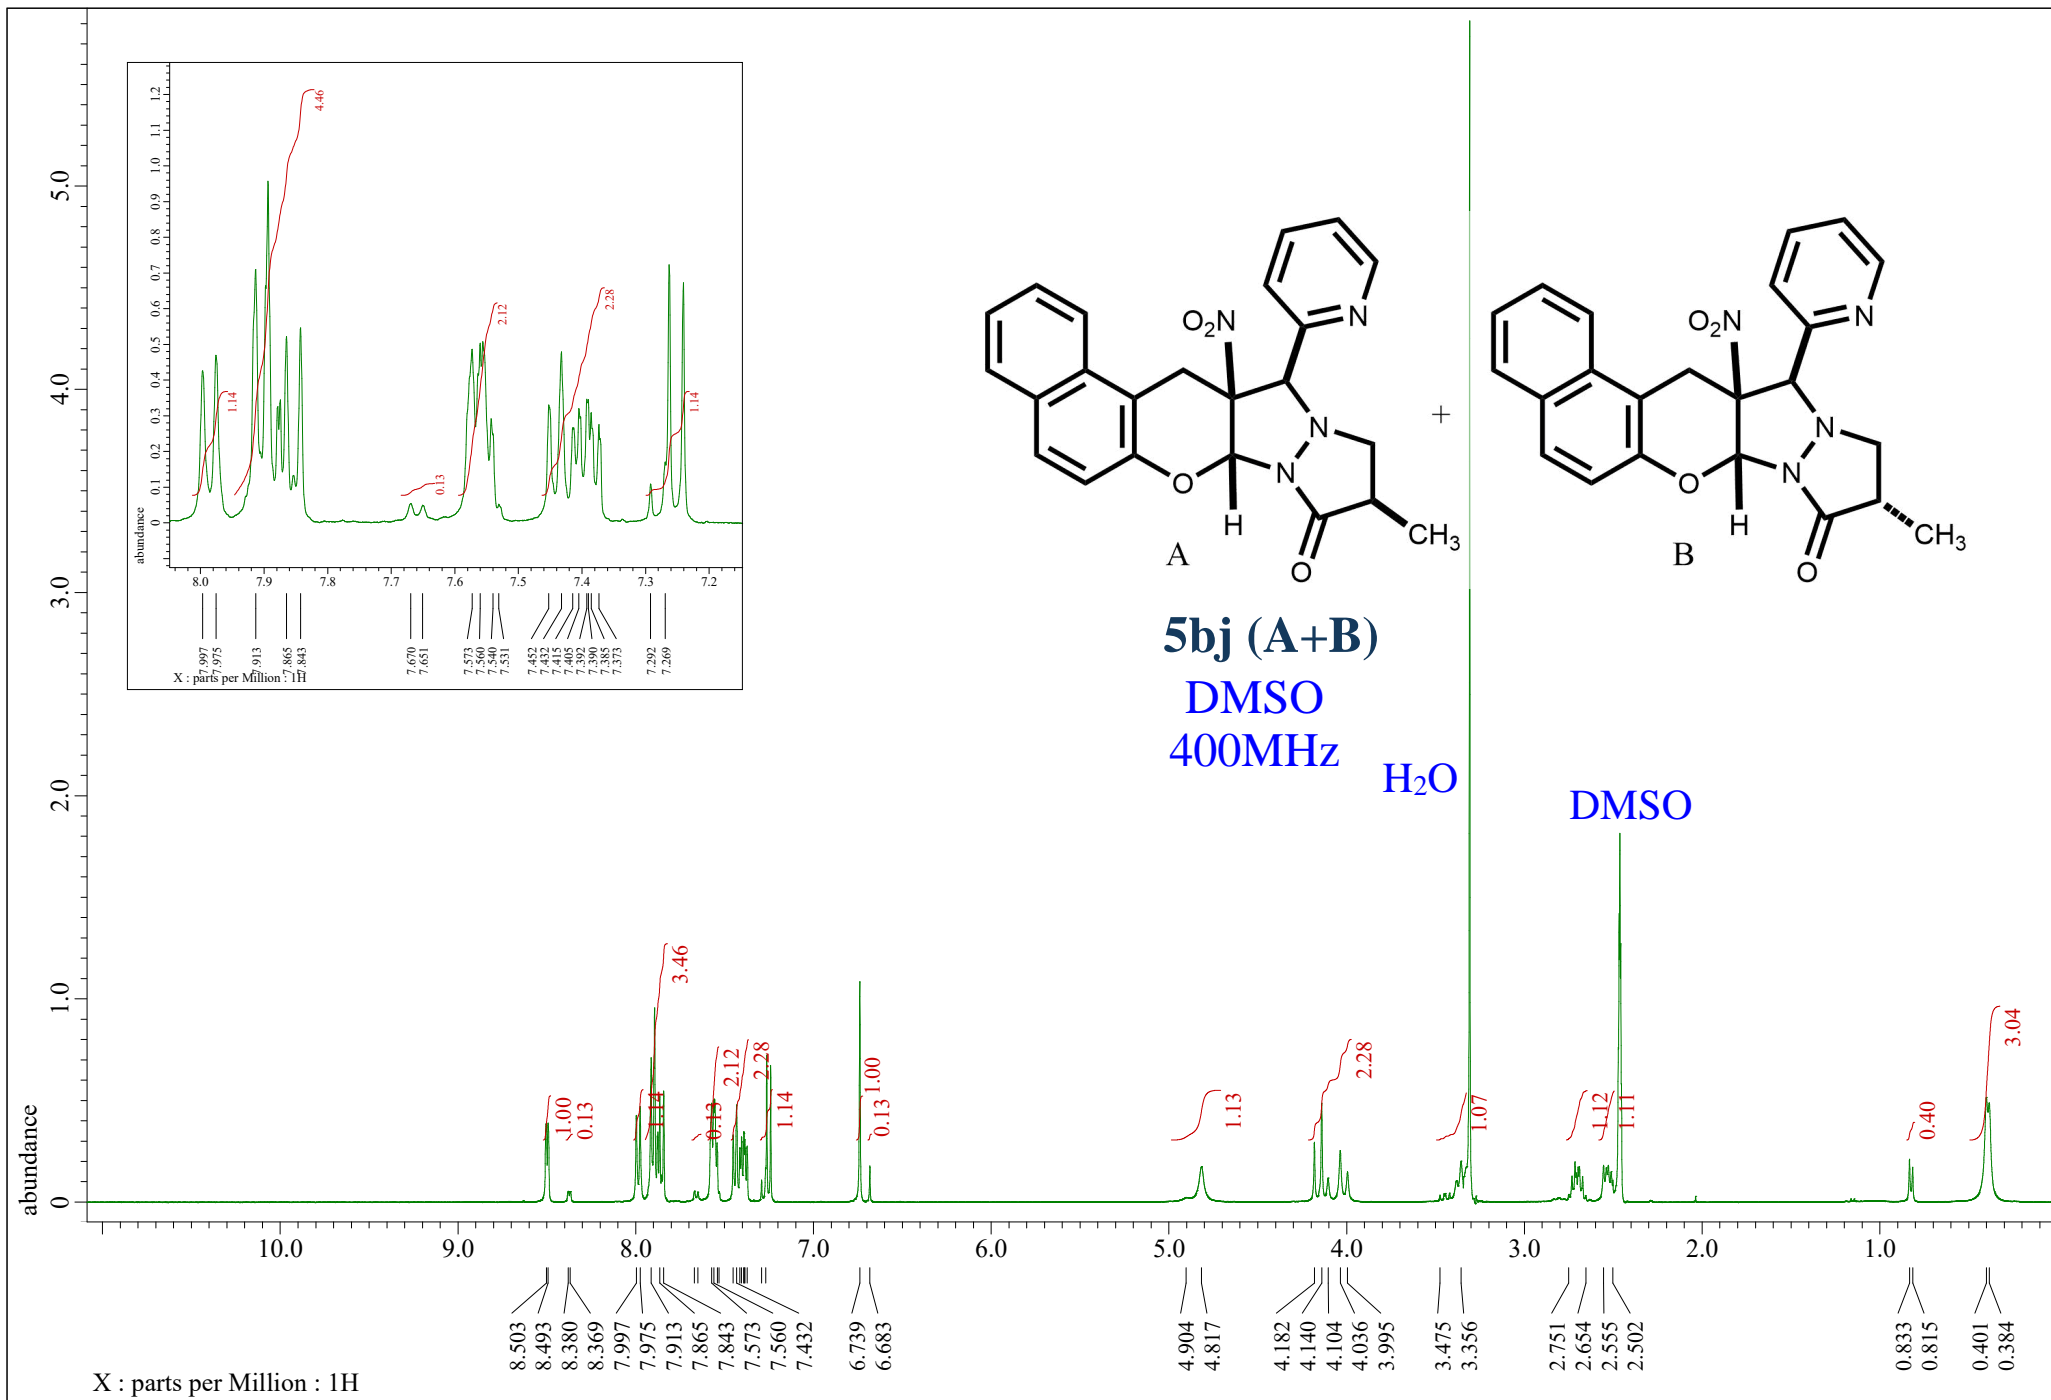

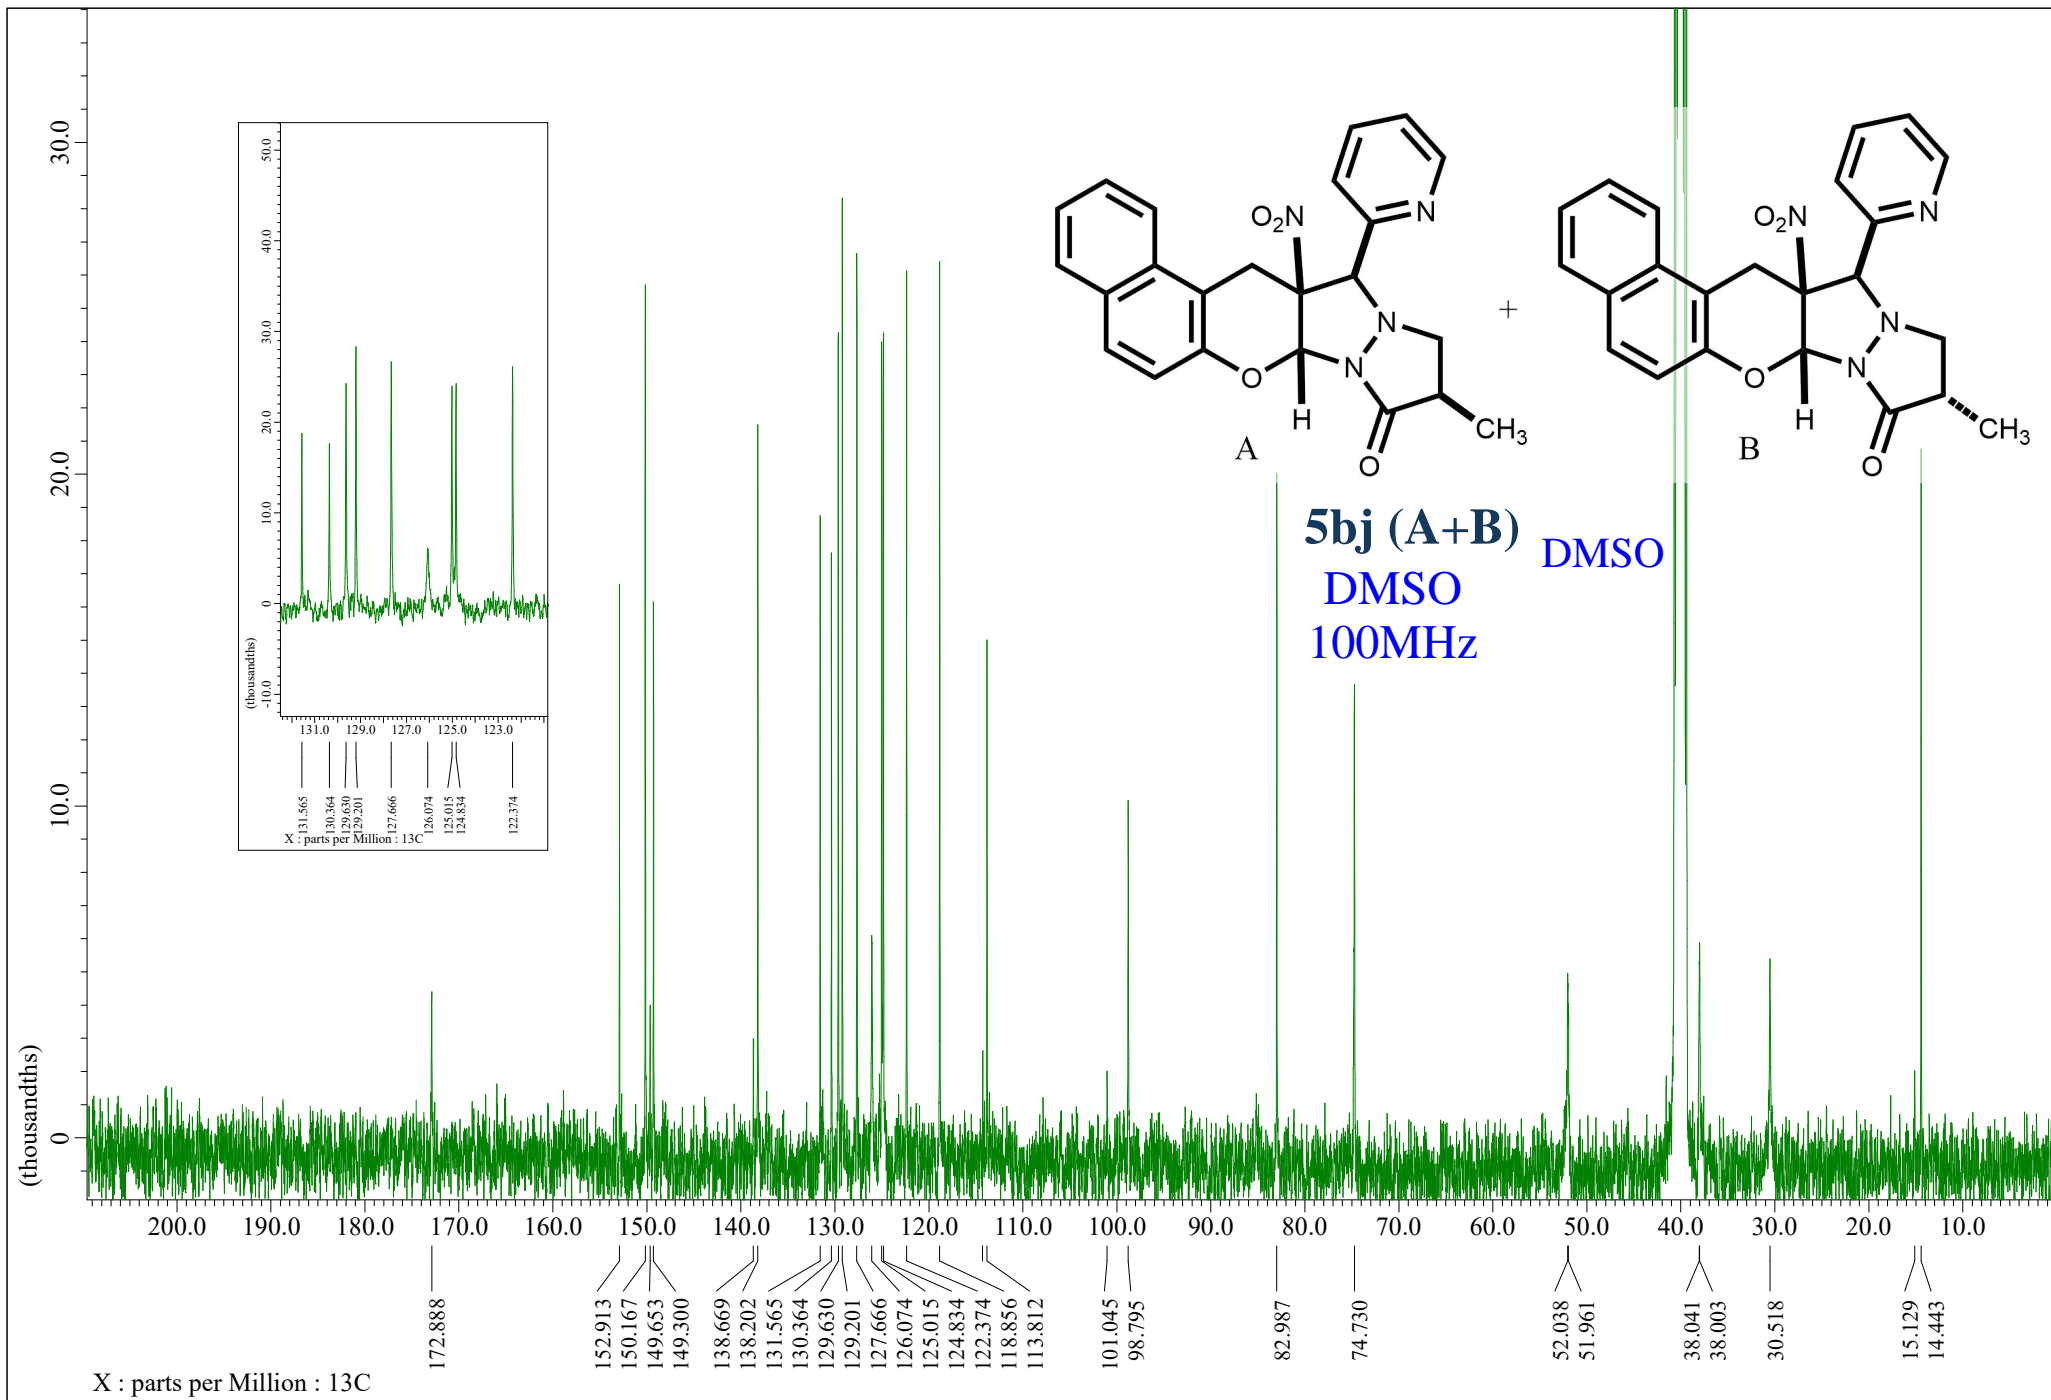

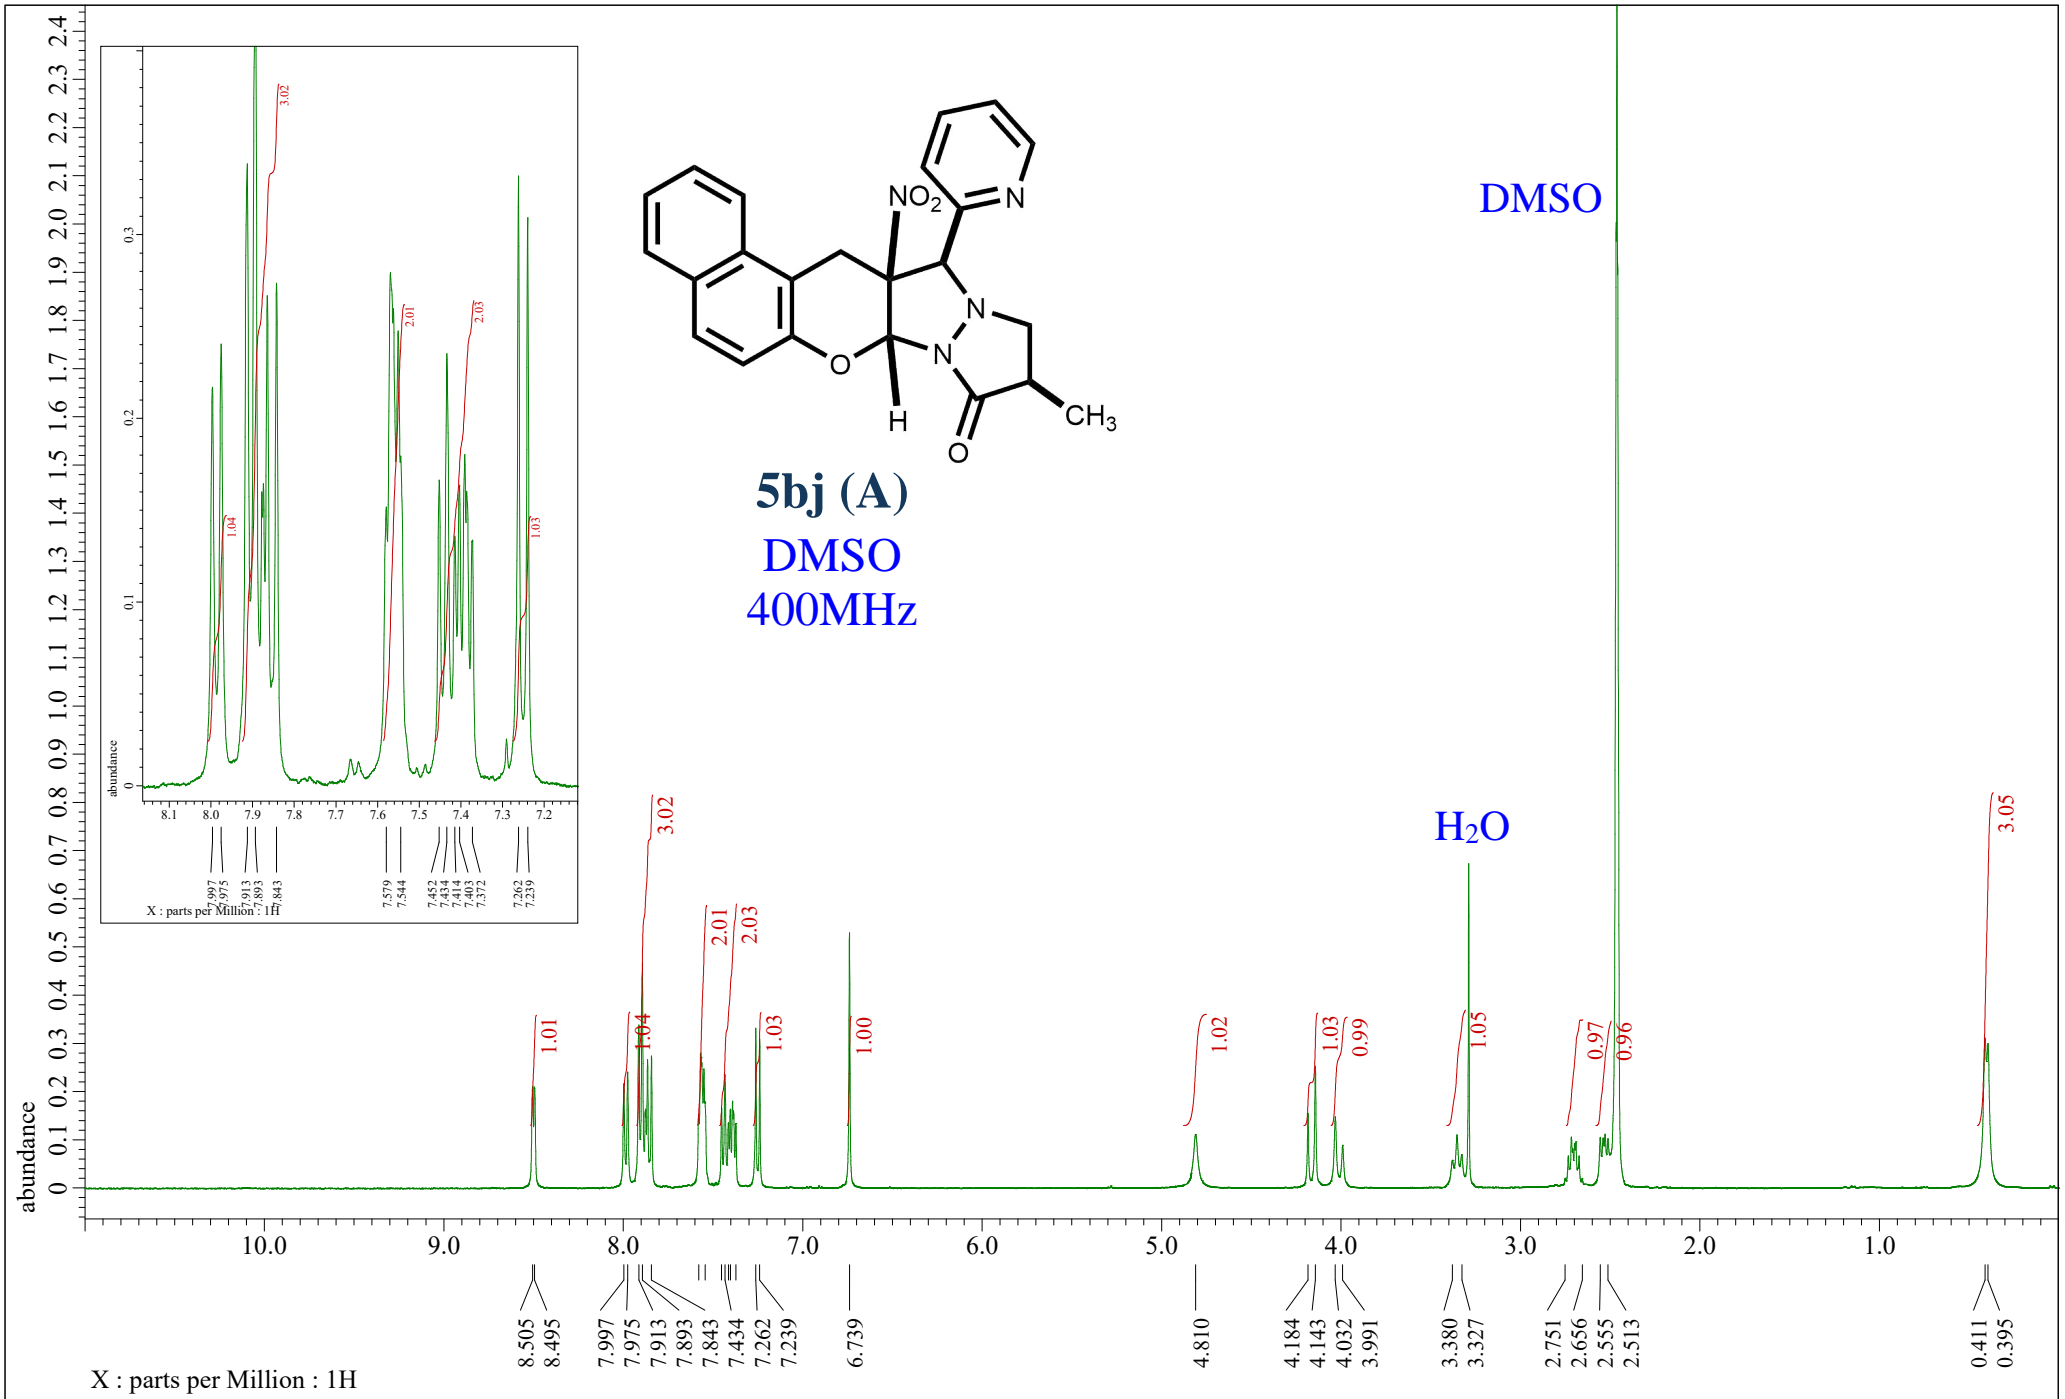

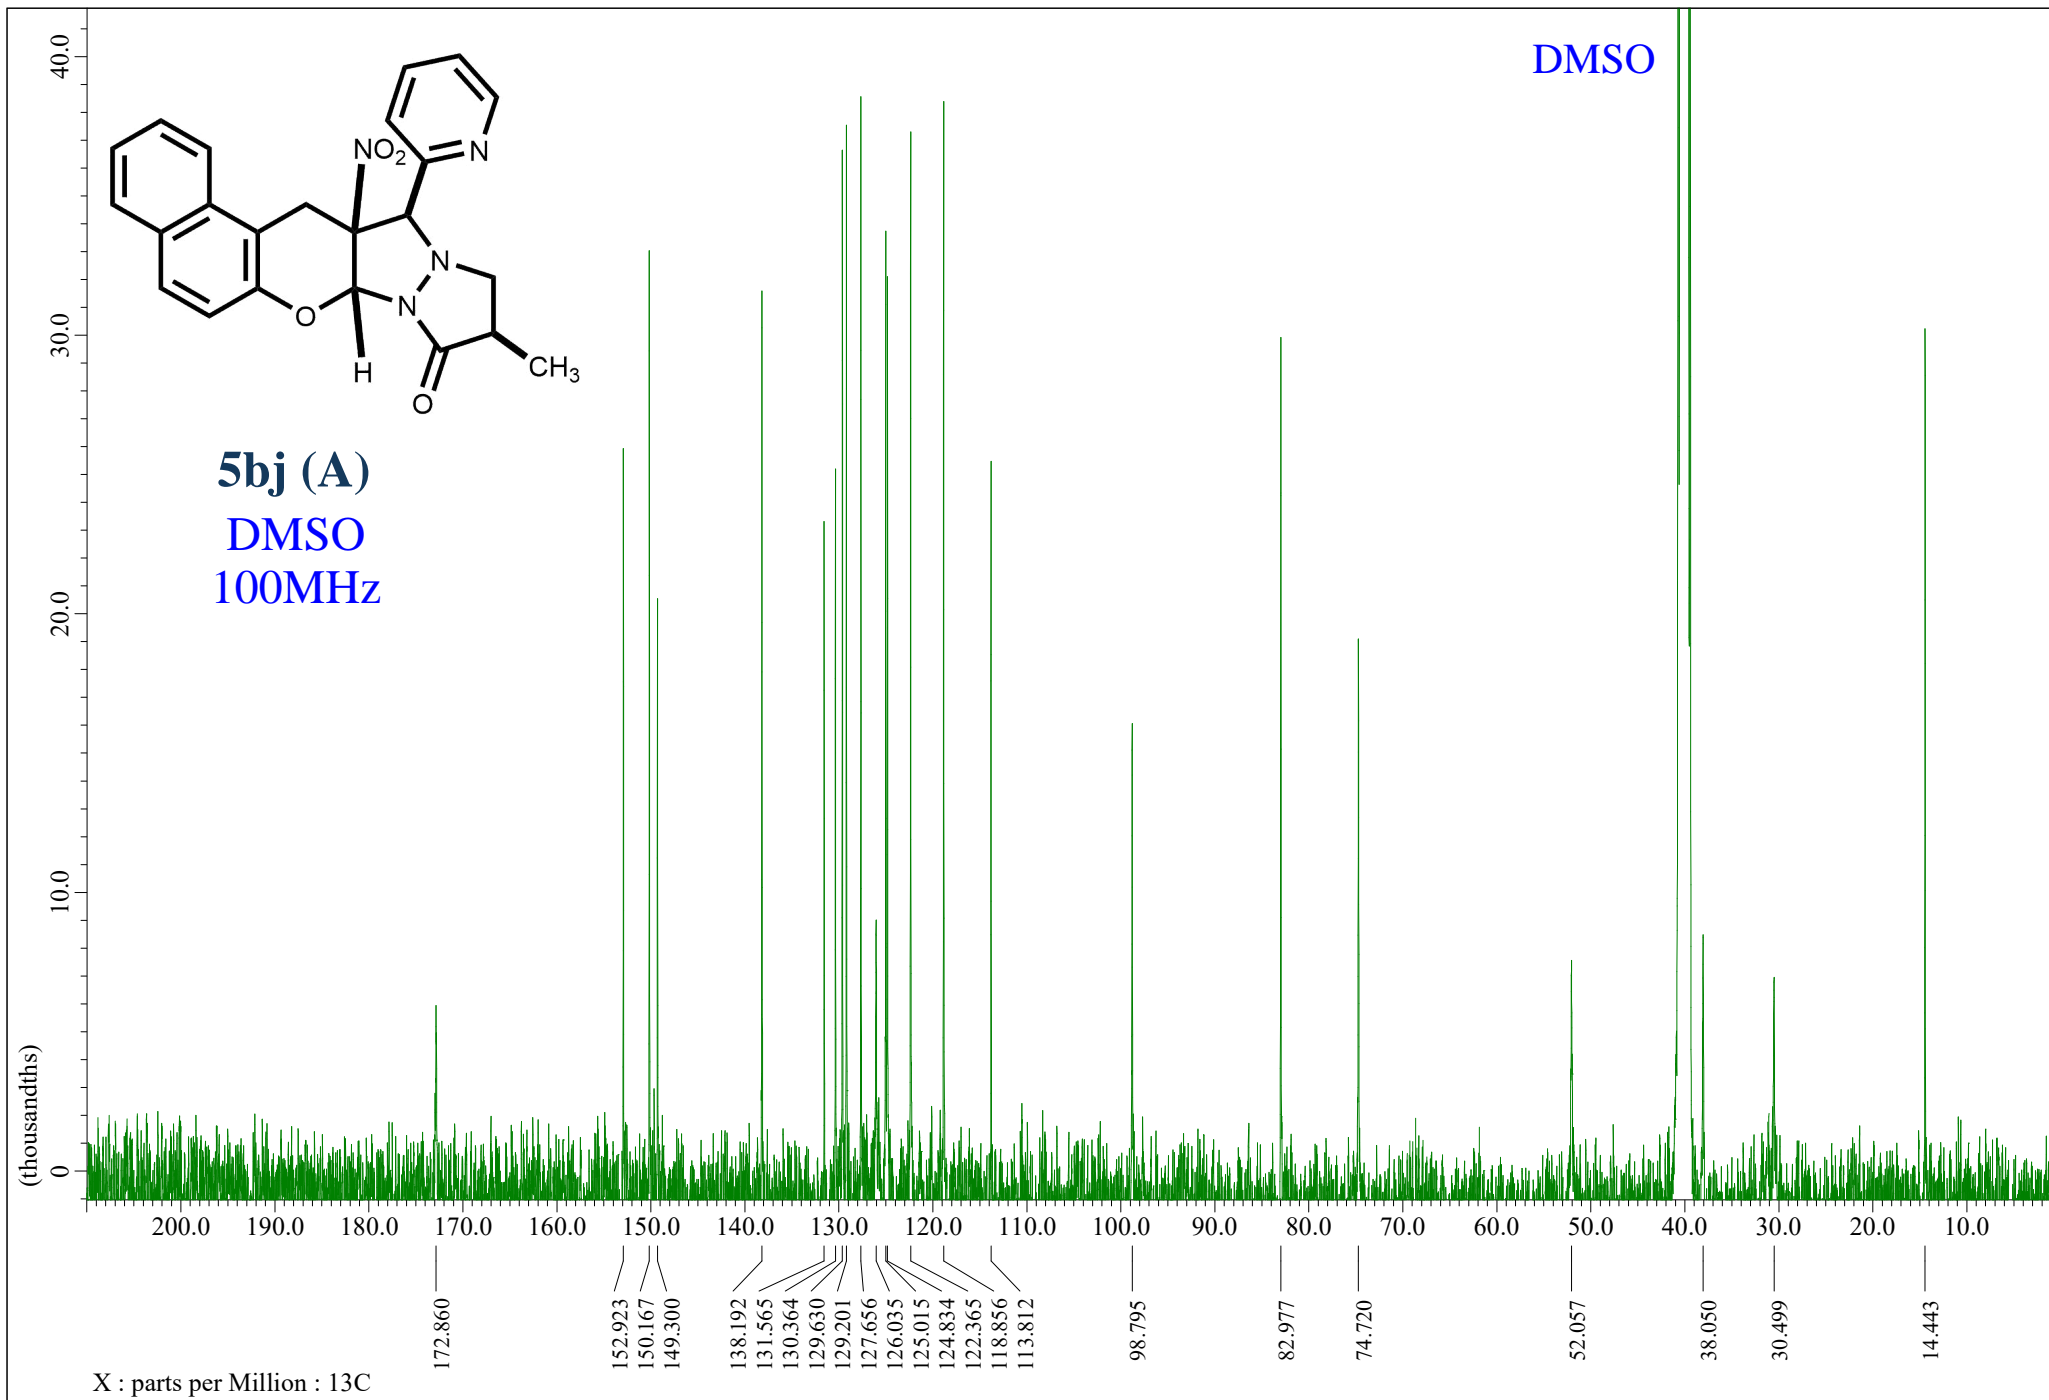

Supplement: d1ob01377g2.pdf [file d1ob01377g2.pdf]
